# Supplementary material
Source: MDPI journal article supplement (https://www.mdpi.com/2227-9040/11/11/558)
Supplement: s1 [file s1]

Archive with 2 entries (2 files):
- Supplementary material-Table S1-3.xlsx
- Supplementary material.pdf
