# Supplementary material
Source: MDPI journal article supplement (https://www.mdpi.com/2227-9040/11/11/558)
Supplement: s1 [file s1 › Supplementary material-Table S1-3.xlsx]

## Sheet: S1-root
Alignment ID	Average Rt(min)	Average Mz	Metabolite name	Adduct type	MS/MS assigned	Reference m/z	Formula	RT matched	m/z matched	MS/MS matched	Total score	Dot product	Reverse dot product	MS1 isotopic spectrum	MS/MS spectrum	QC_1	QC_2	QC_3	QC_4	QC_5	CK1	CK2	CK3	CK4	CK5	CK6	H1	H2	H3	H4	H5	H6	L1	L2	L3	L4	L5	L6
1160	8.681	121.029	4-Hydroxybenzaldehyde	[M-H]-	TRUE	121.029	C7H6O2	TRUE	TRUE	TRUE	71.1	92.6	94.9	121.03046:6819 122.03381:475 123.03717:190	65.0383:14 91.01847:37 92.02984:396 93.03726:65 93.05496:23 95.01491:19 108.01904:28 120.02534:102 121.02789:435 121.06205:19	2805	3114	3160	3843	4040	11688	13560	10818	11419	9058	10332	7317	6289	6464	5377	6635	6819	9384	11243	10150	9272	8980	7929
10490	24.841	284.294	1-desoxymethylsphinganine	[M-H2O+H]+	TRUE	284.294	C17H37NO	TRUE	TRUE	TRUE	77.3	71.7	67.3	284.29163:33146 285.29498:7198 286.29834:1111	57.07129:56 72.04836:56 81.07018:19 100.0735:19 109.10065:19 116.10816:167 123.11597:19 130.11972:111 131.12637:19 266.28922:19 283.39771:56 283.59973:58 284.29187:5580 284.57516:51	30167	33146	33035	39949	36381	43220	47865	49909	49558	55556	42662	30777	30898	31895	34782	53500	61546	39444	39743	42859	51126	43926	35153
25017	7.09	474.173	Folinic acid	[M+H]+	TRUE	474.173	C20H23N7O7	TRUE	TRUE	TRUE	77	77.2	64.8	474.16937:2244 475.17272:625 476.17608:272	117.0555:1 130.04678:1 132.04398:7 134.05963:4 198.08554:1 242.08713:4 259.1207:9 284.11032:17 301.13876:3 326.29742:6 327.11639:373 328.86752:3 331.26013:3 338.09534:3 341.98926:1 345.13409:9 416.06805:3 456.16168:4 474.17432:31	734	821	945	1113	1025	1357	1584	2040	2162	2244	2358	1333	1577	1832	1911	2075	2355	1410	1575	2154	2546	2705	2990
21106	9.198	785.193	Flavone base + 4O, C-Hex-FeruloylHex	[M-H]-	TRUE	785.193	C37H38O19	TRUE	TRUE	TRUE	87.9	90.9	71.9	785.19647:16645 786.19982:8326 787.20318:2270	235.06186:37 282.07242:9 295.08368:9 309.04047:74 309.07025:46 325.0351:19 327.05099:19 339.04071:19 351.077:19 357.06317:46 358.82825:9 411.08124:28 429.07639:224 447.08688:19 489.10083:28 563.22015:19 591.12817:9 609.1524:111 623.1626:28 665.15125:102 665.22406:19 724.12476:9 782.70575:37 784.97394:20 785.19543:3319 785.49994:67 785.66614:20	17396	15299	13758	14099	16645	215	46	30	63	38	130	108	242	51	0	77	83	85	99	98	133	135	65
42088	13.16	771.26	Sylvestroside I	[M+Na]+	TRUE	771.26	C33H48O19	TRUE	TRUE	TRUE	83.6	67.5	75	771.26007:696 772.26342:442 773.26678:0	318.68323:6 771.26959:130 771.46167:12	330	381	528	696	625	441	485	494	470	576	674	542	336	641	553	571	703	333	371	516	598	454	587
5400	17.601	325.238	Avocadyne Acetate	[M-H]-	TRUE	325.238	C19H34O4	TRUE	TRUE	TRUE	64.5	88.5	79.2	325.23837:9484 326.24172:5175 327.24508:1265	79.95802:19 119.04713:74 125.09572:19 147.11629:9 170.00157:130 182.43115:37 183.01115:2066 184.01688:65 195.0094:19 197.02698:65 198.03271:56 211.04286:19 212.05699:19 225.05725:65 226.06841:46 239.06145:19 239.06799:46 240.07948:37 248.25937:9 256.42029:19 261.22507:37 307.19681:19 324.15506:65 324.38126:19 324.68893:20 325.1647:256 325.18506:9922 325.37344:345 325.50583:106 325.63571:74 325.65…	8669	8539	8548	11254	7598	10362	6361	9595	11605	9484	11070	9500	9430	11083	11070	13376	14286	8706	8401	7144	9653	11681	11399
33579	25.407	609.296	(+)-Tubocurarine chloride	[M+H]+	TRUE	609.296	C37H40N2O6	TRUE	TRUE	TRUE	84.4	70.8	75	609.2934:24807 610.29675:3582 611.30011:678	326.33926:19 436.24792:19 449.46289:9 461.22147:19 462.24359:19 489.24445:19 547.27081:19 549.27704:130 577.28778:19 595.48138:19 607.35791:19 607.40662:28 607.78241:20 608.8512:22 609.29358:2753	17322	24807	23117	27337	25356	94	73	126	77	96	75	70	63	62	71	51	63	83	111	116	97	73	72
22690	15.634	439.21	Kurarinone	[M+H]+	TRUE	439.21	C26H30O6	TRUE	TRUE	TRUE	87.5	85.4	79.3	439.20987:25853 440.21322:8911 441.21658:1632	109.09959:4 121.02682:7 137.05846:30 137.13779:7 149.01651:7 149.02513:19 151.03587:26 153.05138:11 163.04071:26 163.06053:7 167.03363:45 167.05553:7 178.47343:22 178.59604:15 178.93764:16 179.03394:2678 179.1794:17 179.26443:11 179.99846:7 181.04913:7 182.25337:7 191.0874:4 193.04948:11 205.0446:11 219.06313:7 221.07964:11 230.61211:4 235.09439:59 235.11603:15 243.06914:7 247.09309:15 247.11528:…	188	238	235	287	248	974	1182	5129	25853	1157	1081	60	106	93	98	89	79	93	131	196	148	135	118
13450	21.42	321.242	(3S)-5-[(1S,8aR)-2,5,5,8a-tetramethyl-4-oxo-4a,6,7,8-tetrahydro-1H-naphthalen-1-yl]-3-methylpentanoic acid	[M+H]+	TRUE	321.242	C20H32O3	TRUE	TRUE	TRUE	82.3	88	64.8	321.24036:4341 322.24371:1093 323.24707:913	321.23697:37	1051	1015	1243	1177	1342	1617	1626	1959	1881	2201	2438	669	724	818	886	888	1163	3344	3676	4472	4341	5355	5828
5025	13.605	177.055	trans-Ferulic acid	[M+H-H2O]+	TRUE	177.055	C10H10O4	TRUE	TRUE	TRUE	77.8	72.7	70.2	177.05254:5985 178.05589:800 179.05925:430	55.93525:19 63.02452:28 72.98664:9 77.04023:28 78.04704:74 88.84553:19 89.03989:284 91.05576:46 95.0891:9 103.05513:28 105.0334:19 106.04122:37 107.42074:9 117.03214:251 118.05901:19 128.94931:19 134.03477:93 145.02724:102 149.05981:93 152.40967:9	2202	2216	2222	2204	2375	4751	4781	5239	6123	5628	5647	5034	5382	5578	5980	5985	6555	4255	4370	4782	5580	5495	4816
15711	1.592	348.07	Adenosine Monophosphate	[M+H]+	TRUE	348.07	C10H14N5O7P	TRUE	TRUE	TRUE	91	84.2	85.7	348.0676:2395 349.07095:379 350.07431:166	86.10149:3 97.03181:13 115.08576:3 119.03339:16 133.06067:3 135.63747:8 136.06029:436	2123	3160	2732	2380	3634	2395	2842	3091	3399	3543	3647	1910	2331	2345	2711	2518	2819	2455	2516	2812	3332	3535	3581
20918	16.986	415.211	6-[3-[(3,4-dimethoxyphenyl)methyl]-4-methoxy-2-(methoxymethyl)butyl]-4-methoxy-1,3-benzodioxole	[M-H2O+H]+	TRUE	415.211	C24H32O7	TRUE	TRUE	TRUE	88.1	87.9	78.7	415.21082:48864 416.21417:14113 417.21753:3383	55.05877:3 61.95153:3 65.03762:9 69.03941:15 73.06532:3 77.04417:15 81.03062:15 81.07383:3 83.39443:3 91.05981:65 93.06693:6 99.0467:6 103.05638:12 104.06044:19 105.0737:9 107.08281:34 109.99888:3 115.05351:50 117.06989:90 118.72052:40 118.79743:19 118.99752:10 119.08685:4268 119.20548:21 119.27484:12 119.28717:12 119.36118:15 119.54631:12 119.61269:9 119.77792:9 119.89999:9 120.24026:9 127.04196…	57021	53899	51806	50313	48864	26024	29292	47448	106422	34608	40951	28073	30431	28764	30256	32409	36482	23101	24200	29937	37922	45548	39987
34109	9.111	617.15	Vicenin II	[M+Na]+	TRUE	617.15	C27H30O15	TRUE	TRUE	TRUE	81.1	70.2	84.8	617.15021:1389 618.15356:537 619.15692:336	194.08662:19 209.07854:37 211.09375:56 437.11279:19 581.12817:19 599.14343:56 601.32556:19 617.14618:186 617.17419:56	676	885	1169	1612	1389	60	51	55	78	47	125	74	65	146	71	79	103	76	35	61	55	103	48
9726	9.758	451.256	(E)-5-hydroxy-N-[3-[5-[3-[[(E)-5-hydroxy-3-methylpent-2-enoyl]amino]propyl]-3,6-dioxopiperazin-2-yl]propyl]-3-methylpent-2-enamide	[M-H]-	TRUE	451.257	C22H36N4O6	TRUE	TRUE	TRUE	60.1	71.7	78.5	451.25742:1788 452.26077:232 453.26413:116	123.08302:19 125.09704:93 125.11283:56 451.24982:148 451.32477:56	1505	1788	1777	1765	1523	1997	1359	1102	1304	1275	1155	1435	1434	1316	1431	1272	1404	1337	1722	1150	1236	974	1300
5301	9.656	183.065	Syringaldehyde	[M+H]+	TRUE	183.065	C9H10O4	TRUE	TRUE	TRUE	82.4	67.3	85.4	183.06438:2214 184.06773:354 185.07109:345	53.23518:6 56.94448:31 65.0414:19 67.06039:19 72.94759:6 77.04095:136 95.04986:93 97.03907:12 97.97013:56 98.98567:19 100.93317:12 105.08468:6 121.03821:6 123.04195:25 125.01953:19 125.02426:62 125.03689:25 140.04469:43 183.09549:19	574	714	646	954	921	1987	2067	2044	2419	2214	2301	1347	1334	1370	1308	1284	1490	1826	2040	1940	2225	2169	2171
11775	17.39	301.216	Retinoic acid	[M+H]+	TRUE	301.216	C20H28O2	TRUE	TRUE	TRUE	80.4	76	70.6	301.21402:10820 302.21737:2942 303.22073:4342	60.04927:19 69.08234:19 77.04259:9 81.07229:28 81.07864:28 85.0289:28 93.07233:37 95.08215:19 95.08491:37 105.07245:56 107.08451:28 107.10058:28 109.1068:37 117.06881:28 119.08579:74 121.10136:102 123.08059:19 123.11504:37 129.06802:28 131.08035:28 131.08682:121 133.10173:56 135.08116:37 137.09502:19 141.06853:19 142.07791:19 143.08246:65 145.09879:93 147.07956:28 147.11893:93 149.09616:37 149.13…	2675	2579	2703	2684	2736	5142	5505	5758	6079	5832	6564	10206	12746	10072	11130	10574	10820	6389	6529	7425	7639	8082	7974
31005	26.323	568.428	Cryptocapsin	[M]+	TRUE	568.427	C40H56O2	TRUE	TRUE	TRUE	77.7	63.2	70.2	568.42584:77133 569.42919:34610 570.43255:9460	79.05406:19 81.06847:12 83.08635:9 91.05002:9 93.07199:34 94.07556:9 95.04874:12 95.08452:22 105.07032:40 107.08377:40 109.10159:37 112.5369:3 117.06777:34 118.07638:19 119.08469:238 119.10009:40 120.09264:37 121.06757:9 121.09863:102 123.07936:65 123.11694:34 125.09509:12 128.05992:28 129.06981:43 130.07402:19 131.08372:96 132.09084:68 133.10019:192 134.10684:56 135.11565:118 137.095:53 138.1016…	65778	77133	74038	77980	76148	2976	1788	1754	1410	1411	2296	1512	2579	1263	1382	1040	837	4447	3518	4271	4783	4001	3246
5204	8.757	181.049	Caffeic Acid	[M+H]+	TRUE	181.05	C9H8O4	TRUE	TRUE	TRUE	87.4	93.1	79	181.05074:953 182.05409:182 183.05745:663	163.03568:19 181.06664:37	386	519	434	551	450	602	809	876	1064	897	1085	833	815	974	953	999	1115	398	431	605	638	648	537
9464	9.78	271.06	Aloe-emodin	[M+H]+	TRUE	271.06	C15H10O5	TRUE	TRUE	TRUE	91.4	83.2	87.7	271.05829:5298 272.06164:889 273.065:376	114.09059:37 119.0524:19 153.01291:130 201.00317:19 269.79803:39 271.05609:1159	3972	5298	5809	8237	6929	362	281	436	490	364	486	204	302	348	341	249	387	400	386	517	642	527	481
9463	12.905	271.06	5,7-dihydroxy-2-(4-hydroxyphenyl)-4H-chromen-4-one	[M+H]+	TRUE	271.06	C15H10O5	TRUE	TRUE	TRUE	94.1	94.4	90.9	271.05795:2048 272.0613:330 273.06466:4653	55.24702:1 57.07379:4 63.03345:1 69.00496:3 79.05261:3 81.06957:3 91.05532:4 95.08585:3 103.07458:3 109.1002:4 115.05914:3 117.10918:3 119.04791:7 121.02586:4 123.07803:3 127.03837:3 128.06021:3 131.08566:3 133.09891:3 141.0705:3 145.02592:9 147.12085:3 153.01874:63 153.03445:19 155.08252:3 161.13994:4 163.03764:6 165.06975:7 170.11118:3 173.13268:3 181.06862:3 183.11621:3 185.10616:3 187.03545:3…	630	615	738	890	862	1895	1855	2048	2287	2121	1929	809	998	877	959	893	824	2185	2470	2648	2878	3011	2331
11759	24.05	301.21	linolenic acid	[M+Na]+	TRUE	301.21	C18H30O2	TRUE	TRUE	TRUE	85.8	88	79.7	301.21127:1658 302.21462:506 303.21798:236	301.20792:37	1135	1243	1077	1117	1038	1014	1171	1394	1167	1505	1658	1185	1529	1397	1310	1801	2173	1156	1156	1349	1294	1617	1864
11016	9.616	491.119	Flavone base + 3O, 2MeO, O-Hex	[M-H]-	TRUE	491.12	C23H24O12	TRUE	TRUE	TRUE	92.4	83.6	90.1	491.11938:287170 492.12273:69846 493.12609:16414	121.02842:19 141.03468:19 149.0175:56 149.02266:148 151.002:56 161.02113:37 163.03691:19 177.05864:37 195.05794:19 199.03226:56 219.08073:19 227.0295:93 234.05199:19 239.04686:37 243.03058:93 243.05917:56 248.20657:19 255.02367:37 255.02817:74 258.05063:19 269.0437:37 270.04709:74 271.02441:246 279.09299:19 283.02322:56 285.03558:130 285.07608:130 294.47723:19 298.04837:112 299.01651:1402 300.022…	283919	283026	272867	285120	287170	607	453	571	341	347	361	347	486	324	351	264	279	667	652	462	652	389	388
2885	2.703	121.065	Phenylacetaldehyde	[M+H]+	TRUE	121.065	C8H8O	TRUE	TRUE	TRUE	80	62.9	78.1	121.06474:3433 122.06809:518 123.07145:435	50.01715:6 51.02645:20 51.05368:4 53.04343:9 60.98972:4 62.93296:3 65.04093:14 65.05914:3 66.04196:3 71.95703:3 74.01544:1 76.80391:3 77.04037:223 78.05091:4 79.05675:34 79.07181:4 82.7434:1 84.96006:7 89.0452:1 91.05571:51 93.07096:7 94.04031:11 102.04577:3 103.05493:47 105.07224:23 105.08815:6 106.07732:3 119.08533:4 121.06358:7 121.0993:6	1779	1742	2004	1768	2044	2733	2287	2526	2410	2253	2316	1954	2240	1856	1812	1936	1902	3271	3433	3257	3393	2878	3460
12777	11.574	314.138	feruloyltyramine	[M+H]+	TRUE	314.139	C18H19NO4	TRUE	TRUE	TRUE	91.8	86.9	88.5	314.13791:6925 315.14126:1511 316.14462:270	89.05513:5 91.05365:19 93.06889:9 101.04233:5 103.05571:23 117.03423:84 121.06459:195 122.07154:14 145.02774:471 149.06032:28 177.05539:633 178.05412:19 186.92404:5 196.03523:5 297.27728:5 314.13708:14	1183	1456	1541	1716	1614	5349	6008	6177	6503	6925	6459	2640	3278	2797	3046	3045	2566	5547	6777	6050	7770	7036	6578
22605	16.949	438.19	Protostemotinine	[M+Na]+	TRUE	438.19	C23H29NO6	TRUE	TRUE	TRUE	86.7	78.4	75	438.19269:2564 439.19604:890 440.1994:147	89.06326:5 283.18054:5 397.20126:5 437.60367:9 438.19739:406 438.32147:9	2846	2800	3160	2846	3054	1670	1585	1665	5261	1861	2564	1829	1519	1648	1508	1993	2693	1441	1353	1456	1901	2548	2573
33693	8.616	611.159	Meloside L	[M+H]+	TRUE	611.159	C27H30O16	TRUE	TRUE	TRUE	77.4	70.2	63	611.159:131978 612.16235:48171 613.16571:13993	61.033:9 83.4591:9 85.0293:37 127.03587:28 137.02007:19 145.04701:56 165.01784:28 173.02008:9 249.94005:9 255.0719:9 283.05731:37 286.04791:19 287.05386:269 297.07654:56 298.10654:28 298.31128:28 299.05533:2066 299.24329:23 300.05695:37 301.07495:19 311.05853:139 311.08841:28 313.0658:28 323.05176:19 325.03369:46 325.07184:158 327.04971:65 328.03323:47 328.61127:20 329.06689:4317 329.2692:30 329.…	75673	98917	95379	131978	126090	438	432	356	459	413	340	344	292	401	285	364	284	284	311	340	312	290	254
23842	14.373	861.189	Sennoside B	[M-H]-	TRUE	861.188	C42H38O20	TRUE	TRUE	TRUE	82.1	62.3	74.4	861.18896:2785 862.19231:742 863.19567:636	160.01006:28 160.01541:56 160.03683:19 161.0186:28 161.84532:9 175.03931:186 180.32022:9 307.08923:19 361.10336:19 513.17932:9 555.14124:28 583.15448:19 601.17902:19 625.18188:19 643.18811:46 653.1958:9 667.19415:46 685.1853:56 759.2088:37 777.21155:28 801.22778:121 819.23425:139 826.13263:19 858.50879:19 861.04578:20 861.25287:2585 861.5553:29	3210	2307	1860	2606	1622	4788	4156	2785	3061	2937	4075	5552	5705	4041	4546	6467	1332	3440	5469	4433	3588	2576	2145
30787	8.925	565.153	5,7-dihydroxy-2-(4-hydroxyphenyl)-6-[3,4,5-trihydroxy-6-(hydroxymethyl)oxan-2-yl]-8-(3,4,5-trihydroxyoxan-2-yl)chromen-4-one	[M+H]+	TRUE	565.153	C26H28O14	TRUE	TRUE	TRUE	92.1	85.7	93.1	565.15295:59526 566.1563:23715 567.15966:5828	203.02634:19 217.07227:9 255.03172:9 283.05743:46 294.05045:19 295.0582:223 295.07761:56 297.06918:19 307.05579:121 308.06824:19 309.06995:19 313.07056:111 317.08685:9 321.07056:56 322.08557:19 323.06158:19 323.31281:9 325.06894:330 333.0704:19 335.08792:37 336.07565:19 337.06744:401 337.09854:65 347.09467:37 349.05392:46 349.06448:299 351.08218:74 353.05795:19 355.07651:102 361.06741:93 363.0898…	59526	82243	69810	81780	101065	420	407	458	479	505	455	375	469	685	416	931	622	556	601	739	943	774	835
4600	16.01	297.15	aurapten	[M-H]-	TRUE	297.15	C19H22O3	TRUE	TRUE	TRUE	64.2	82.3	72.2	297.15076:34368 298.15411:5423 299.15747:1728	79.96002:37 119.05019:111 130.99161:28 155.10101:19 170.00217:130 182.43721:56 182.56305:22 183.01147:4246 183.15852:44 184.01718:176 197.02898:93 198.03271:130 211.04051:37 212.05051:56 212.07516:28 225.05664:65 226.06564:84 230.44118:9 233.18748:56 239.06705:56 239.08232:37 240.08069:56 253.09613:19 254.09857:28 268.10959:28 296.20682:56 297.1525:9801 297.24252:98 297.33502:287 297.4567:139	34368	30769	30515	36017	32688	39490	30854	27458	29217	26632	27751	34136	29345	24448	27484	26993	27923	34263	30189	28352	28059	24588	32360
14992	16.915	339.19	Cafestol	[M+Na]+	TRUE	339.19	C20H28O3	TRUE	TRUE	TRUE	80.3	75	74.1	339.18964:1876 340.19299:500 341.19635:920	339.19077:93	476	481	416	479	410	748	856	742	882	1060	855	1876	2498	1814	2028	1859	2182	980	1112	1270	1414	1367	1196
11946	20.238	303.231	16,17-dihydroxy-7-kauranone	[M-H2O+H]+	TRUE	303.231	C20H32O3	TRUE	TRUE	TRUE	83.3	71.3	80.2	303.23019:7168 304.23354:1471 305.2369:1050	55.05856:4 59.0812:1 61.03262:3 67.05746:6 69.07556:3 77.04147:3 79.05411:3 81.06853:4 81.0698:13 83.04913:7 83.08643:4 86.11919:1 91.05556:6 93.07081:7 95.09022:10 97.06454:4 101.06126:1 105.07205:11 105.08363:3 107.08554:7 109.10191:11 111.12519:3 115.05635:6 117.07124:16 119.08511:20 121.1022:19 123.0814:10 123.11898:19 125.10664:6 128.06364:6 129.07034:9 131.08427:19 133.06494:4 133.10077:30 …	1354	1549	1399	1750	1549	3154	3120	3195	3665	3362	4848	7168	7179	7704	8346	8063	9244	2623	2751	3187	3205	3388	3532
16203	7.272	651.122	Flavone base + 3O, 1MeO, O-HexA-HexA	[M-H]-	TRUE	651.122	C28H28O18	TRUE	TRUE	TRUE	89.1	86.7	79.5	651.12164:1880 652.12499:294 653.12835:294	102.53159:3 157.0233:3 175.02632:11 191.04121:3 193.03229:24 289.05173:5 291.53586:3 299.04706:8 327.04123:3 351.05612:188 651.12225:77	1880	1709	1728	1208	1208	108	94	63	87	168	98	58	77	39	82	118	112	124	133	45	84	82	35
13182	16.427	318.301	Phytosphingosine	[M+H]+	TRUE	318.3	C18H39NO3	TRUE	TRUE	TRUE	94	90.4	93.3	318.30057:102578 319.30392:24137 320.30728:3098	55.05928:56 56.05245:111 57.0385:23 57.04703:19 57.07582:56 58.06972:14 59.86463:42 60.04825:1217 60.08107:28 60.27378:19 67.05714:79 69.07288:102 70.06655:42 71.08516:37 72.04641:28 73.02979:14 74.06236:65 77.03867:14 79.05753:42 79.06632:19 81.06947:88 82.06382:28 83.05137:23 83.08611:70 85.10276:28 86.05991:46 90.05588:23 90.07195:14 91.57048:5 93.06911:56 95.08714:88 96.0835:19 97.10176:42 10…	47234	42947	47836	43396	43910	93372	100456	102578	98518	91857	69653	134736	129594	119861	123225	113066	71462	86286	95248	96416	120677	126563	93167
5113	6.253	315.074	4-O-galloyl-1,5-anhydro-d-glucitol	[M-H]-	TRUE	315.073	C13H16O9	TRUE	TRUE	TRUE	90.9	85.8	79.1	315.07327:3490 316.07662:719 317.07998:144	65.05479:6 109.03069:161 125.02121:12 153.01649:297 253.14253:6 297.06219:6 315.06335:31	18770	16215	15744	13769	17714	1922	2027	1572	1288	1652	1439	4408	3913	2823	2751	2589	2805	3490	2484	2730	2523	3047	2809
17483	8.088	369.117	methyl chlorogenate	[M+H]+	TRUE	369.117	C17H20O9	TRUE	TRUE	TRUE	84.8	80.1	78.4	369.11816:5363 370.12151:1167 371.12487:5828	117.03359:56 145.02838:260 149.05919:65 155.08504:9 176.50578:19 177.05191:653 267.09982:19	4110	5063	4884	5804	5761	5363	6615	5965	7046	7684	8253	6211	6501	6942	7414	7311	7013	4732	4974	5986	7132	7514	6427
42181	8.953	773.192	[(2S,3R,4S,5S,6R)-2-[(2S,3R,4S,5S,6R)-2-[5,7-dihydroxy-2-(4-hydroxyphenyl)-4-oxochromen-3-yl]oxy-4,5-dihydroxy-6-(hydroxymethyl)oxan-3-yl]oxy-4,5-dihydroxy-6-(hydroxymethyl)oxan-3-yl] (E)-3-(3,4-dihydroxyphenyl)prop-2-enoate	[M+H]+	TRUE	773.193	C36H36O19	TRUE	TRUE	TRUE	82	81.2	73.4	773.19208:2577 774.19543:961 775.19879:343	163.02888:19 163.03429:74 163.04871:19 283.05298:9 299.05798:28 325.09219:28 329.05914:65 345.12555:9 353.06894:37 377.06296:9 383.07559:37 413.08282:19 431.09906:84 449.08392:19 449.10785:149 611.15271:19 742.91699:9 773.18958:149 773.23273:19	2577	3219	3343	4022	4746	30	24	18	37	26	24	33	31	18	30	16	21	26	24	43	25	47	26
2772	16.664	118.086	Betaine	[M+H]+	TRUE	118.086	C5H11NO2	TRUE	TRUE	TRUE	87.7	73.3	85.4	118.0849:1360 119.08825:667 120.09161:419	58.06396:37 58.06719:130 59.0729:37 72.94009:37 118.09722:37	1120	1123	1176	1258	1269	1217	1436	1589	1927	1579	1625	1349	1373	1492	1635	1859	1699	1360	1451	1489	1604	1729	1689
15933	0.966	351.07	bergenin	[M+Na]+	TRUE	351.07	C14H16O9	TRUE	TRUE	TRUE	78.7	75	73.8	351.0654:7308 352.06875:1106 353.07211:13763	351.09329:37	2317	2868	2993	2879	2985	6170	7215	7654	6891	7838	7734	6167	6593	6779	7561	6936	7308	6449	8398	7005	7730	8589	7262
6264	15.943	205.122	1-[4-hydroxy-3-(3-methylbut-2-enyl)phenyl]ethanone	[M+H]+	TRUE	205.122	C13H16O2	TRUE	TRUE	TRUE	80.2	68.8	82.6	205.11949:3058 206.12284:390 207.1262:615	56.95786:19 65.0396:28 77.04:28 82.9575:19 91.05647:19 93.06898:19 100.93444:19 105.03526:102 105.04827:19 107.08341:19 121.02832:102 146.07387:19 149.02113:269 149.04527:65	3058	2903	2906	3180	3246	3057	3040	2586	2301	2697	2397	2839	2920	2925	2498	2771	2877	2629	3483	3262	2667	2632	2399
21953	23.003	429.299	Neoruscogenin	[M+H]+	TRUE	429.3	C27H40O4	TRUE	TRUE	TRUE	85.6	88	78.2	429.29938:1474 430.30273:141 431.30609:846	429.31583:56	832	1026	986	891	1007	1220	1474	1121	860	1203	1545	1050	867	1240	777	956	1435	961	1266	1281	1033	1249	1112
36949	9.625	669.166	Flavone base + 3O, 2MeO, O-Hex, O-HexA	[M+H]+	TRUE	669.167	C29H32O18	TRUE	TRUE	TRUE	86.9	88.9	78.5	669.16583:23093 670.16918:7874 671.17254:2478	201.79961:19 273.04166:37 313.03204:19 315.04315:93 316.04861:37 330.04184:56 331.08121:4119 332.08105:93 354.15344:19 491.94968:19 493.14636:132 667.58234:38 669.16974:777	16371	19573	19799	22743	23093	124	89	152	156	126	163	100	112	97	94	147	82	123	152	88	163	136	97
22118	24.66	431.311	(2aS,4S,5'R,6aR,6bS,8aS,8bR,9S,10R,11aS,12aS,12bR)-4-hydroxy-5',6a,8a,9-tetramethylicosahydrospiro[naphtho[2',1':4,5]indeno[2,1-b]furan-10,2'-pyran]-2(1H)-one	[M+H]+	TRUE	431.31	C27H42O4	TRUE	TRUE	TRUE	86	75	75	431.3114:2426 432.31475:636 433.31811:1268	431.30035:111 431.32379:93	2585	3054	2426	2315	2158	481	537	551	706	778	702	335	476	387	388	540	645	447	554	580	573	652	572
14434	15.948	333.207	7-ethenyl-4b-hydroxy-1,1,7-trimethyl-9-oxo-3,4,5,6,10,10a-hexahydro-2H-phenanthrene-4a-carboxylic acid	[M+H]+	TRUE	333.206	C20H28O4	TRUE	TRUE	TRUE	79.2	79	60.5	333.20651:27267 334.20986:6324 335.21322:5971	93.06817:19 95.08755:25 105.07505:25 107.04767:12 107.09003:31 109.10055:80 117.07136:19 119.08063:19 119.08678:87 121.06505:31 121.09922:56 123.11755:25 129.06248:19 131.04726:19 131.08443:43 132.05426:31 133.10092:50 135.07866:80 135.11639:43 137.05777:25 142.08029:19 143.08821:31 145.10283:50 146.7209:13 147.08189:349 147.11099:37 149.09158:37 156.09357:19 157.10217:50 159.07925:62 161.09558:5…	5846	5668	6176	6301	6052	15156	16338	16378	15959	16697	15836	15143	27267	13257	16899	15398	16042	15472	16152	17315	18719	18098	15516
3382	32.231	255.233	Palmitic acid	[M-H]-	TRUE	255.233	C16H32O2	TRUE	TRUE	TRUE	65.2	86.9	77.5	255.23256:7762 256.23591:5235 257.23927:215	115.07898:5 184.0489:5 225.10463:5 237.21938:9 255.23088:500 255.25569:98	4814	4765	4431	7762	4266	3824	3384	3340	3298	2888	3374	3312	3501	3292	3208	2872	2877	3745	2936	2945	3047	3812	3038
15184	15.801	341.211	andrograpanin	[M+Na]+	TRUE	341.21	C20H30O3	TRUE	TRUE	TRUE	93	87.5	87.5	341.20987:1691 342.21322:527 343.21658:272	341.09134:37 341.20605:186	1228	1237	1238	1114	1104	1691	1699	1528	1585	1546	1979	2770	2843	2546	2569	2660	3211	1597	1771	1595	1442	1697	1885
23330	9.67	449.107	Cyanidin-3-O-glucoside	[M]+	TRUE	449.107	C21H21O11	TRUE	TRUE	TRUE	84.6	76.9	82.1	449.10657:4739 450.10992:1039 451.11328:654	245.01169:19 269.07932:38 287.05258:644 287.96686:20 297.70807:19 329.08844:19	3528	4508	4092	4699	4739	66	110	86	123	113	121	101	172	86	115	75	87	76	79	121	88	106	75
4942	14.816	309.205	FA 18:3+2O	[M-H]-	TRUE	309.205	C18H30O4	TRUE	TRUE	TRUE	82.9	68.2	72.3	309.20789:2991 310.21124:863 311.2146:4314	73.02998:9 127.11562:19 136.08939:9 137.09564:65 139.11925:19 153.08604:19 155.10268:28 161.12067:9 167.10718:19 171.09732:28 171.09917:74 185.11269:9 221.12039:9 247.1987:19 251.04601:9 265.21536:19 281.20618:9 291.19153:65 291.21561:37 309.20538:37	2375	2366	2732	2779	2174	6447	6136	4917	5852	5557	5619	3235	3011	3067	3279	2991	3143	3549	4275	3186	3464	3897	3550
11780	7.634	515.118	3,4-di-O-caffeoylquinic acid	[M-H]-	TRUE	515.119	C25H24O12	TRUE	TRUE	TRUE	62.8	84.1	77.4	515.1214:612 516.12475:560 517.12811:140	499.08286:9 515.12042:158 515.16852:28	300	341	398	625	322	589	612	617	692	619	649	747	496	455	771	600	680	1124	823	675	670	619	640
5328	5.697	323.133	Methyl 2-O-alpha-L-rhamnopyranosyl-alpha-L-rhamnopyranoside	[M-H]-	TRUE	323.133	C13H24O9	TRUE	TRUE	TRUE	92	74.6	90.5	323.13345:6284 324.1368:435 325.14016:435	58.00621:6 59.01673:105 60.08081:6 71.01366:31 83.01282:12 89.02689:111 89.66325:6 101.02805:25 113.02575:43 119.03663:74 131.05656:6 143.07318:6 162.04134:6 323.13171:105	5088	6284	5628	5899	4069	2556	2936	1950	1662	2144	2379	1385	1567	1146	961	922	1793	2784	2562	1688	1391	2120	1425
23208	9.657	447.131	Swertisin	[M+H]+	TRUE	447.13	C22H22O10	TRUE	TRUE	TRUE	94.3	87.4	96.6	447.1308:16203 448.13415:4648 449.13751:5273	267.06451:93 281.0842:19 285.07397:38 292.06824:19 297.05139:57 297.0733:924 304.06223:19 309.06931:56 311.09009:37 323.09152:186 325.06339:19 327.08206:245 327.1076:151 329.46561:19 337.09821:56 337.10596:223 339.08109:37 343.0303:37 347.10757:19 351.08725:377 360.06223:19 363.0871:93 365.09634:56 373.11514:19 375.08627:204 376.13675:19 381.09427:111 389.96014:19 393.09668:241 409.81311:19 411.1…	9422	12288	11847	14099	16203	286	257	290	327	307	366	261	263	298	233	231	241	316	295	367	304	273	319
22230	9.766	433.111	Cosmosiin; Apigenin 7-O-glucoside	[M+H]+	TRUE	433.11	C21H20O10	TRUE	TRUE	TRUE	88.7	76	85.2	433.11084:6135 434.11419:1641 435.11755:720	81.03638:19 100.88332:19 153.05072:38 213.05907:19 249.07375:19 263.06754:39 271.05771:1139 271.6134:20 278.84442:19 283.07709:37 386.13766:19	6135	7293	7717	9103	8794	402	496	547	467	567	686	448	366	460	406	396	476	597	735	627	703	759	614
24330	9.981	463.122	Peonidin-3-O-glucoside	[M]+	TRUE	463.123	C22H23O11	TRUE	TRUE	TRUE	85.7	77.3	82.1	463.12265:35660 464.126:9348 465.12936:3083	55.05465:9 81.04612:9 85.02938:56 97.02896:19 114.0901:102 115.09492:28 127.03782:19 134.10829:9 145.056:19 209.16824:37 227.17181:28 228.15578:46 229.1611:46 229.18675:19 246.19974:19 258.05087:74 281.03918:9 286.04715:348 300.11981:38 300.39374:20 301.02771:23 301.06937:4377 301.26288:46 301.37314:19 301.50302:19 301.77267:19 302.0719:28 302.83044:19 305.07233:19 307.70117:19 313.06763:204 313.…	30255	36371	33147	35660	33019	468	440	581	566	600	536	332	444	466	436	490	574	672	835	880	853	860	741
11506	7.109	298.096	5'-S-Methylthioadenosine	[M+H]+	TRUE	298.097	C11H15N5O3S	TRUE	TRUE	TRUE	85.3	67.5	83	298.0957:16767 299.09905:3146 300.10241:1349	61.01278:65 65.04424:5 75.02914:46 97.02982:37 119.03437:93 119.05131:33 135.63531:33 135.65504:23 136.06142:2431 136.18988:12 137.06267:28 137.52577:9 145.02795:79 151.01076:5 163.03799:37 249.98895:23 250.0202:9 265.01602:14 266.02115:51 281.04932:14 282.05118:74 298.09668:46	5784	6649	7710	9811	9202	13340	14372	16767	18680	17710	19104	8940	10716	10474	11843	11037	12909	10275	11036	13086	14653	14826	14501
41321	9.28	757.201	Flavone base + 4O, C-Hex-CoumaroylHex	[M+H]+	TRUE	757.2	C36H36O18	TRUE	TRUE	TRUE	76.7	72.6	66.4	757.20123:8676 758.20458:4669 759.20794:1111	91.05827:19 147.04224:279 149.27922:19 287.05533:19 291.08228:37 299.05923:37 309.09644:111 329.0556:37 329.06073:167 329.09659:37 349.76062:19 353.05756:37 353.07346:56 365.07187:19 383.0723:37 383.0806:111 386.44461:19 395.08032:93 413.08832:74 429.76358:19 431.09604:186 432.14001:38 449.10495:381 593.17468:19 595.16681:37 711.12726:19 756.26831:38 757.20795:302	5343	7868	7169	8370	8676	40	53	36	58	59	69	44	68	59	35	58	131	53	56	50	74	83	50
3846	1.062	147.077	L-glutamine	[M+H]+	TRUE	147.076	C5H10N2O3	TRUE	TRUE	TRUE	80.2	64.9	64.9	147.07825:2670 148.0816:7746 149.08496:4123	56.05135:56 84.04366:74	3327	3822	3112	3277	2857	3041	2424	2735	2966	2868	2823	3643	4447	5203	5237	5946	4971	2288	3098	3585	3604	2670	3594
26268	10.511	493.135	Oenin	[M]+	TRUE	493.134	C23H25O12	TRUE	TRUE	TRUE	89.6	84.5	76.7	493.13251:132269 494.13586:48388 495.13922:10579	127.0369:19 153.03447:37 241.04211:19 255.02798:19 258.05069:56 270.0527:186 286.04193:56 287.05743:56 298.77585:19 301.58578:19 313.03702:38 315.05063:605 316.06113:219 330.05206:167 330.22388:93 330.92966:83 331.08374:25383 331.28152:980 331.38943:394 331.41769:130 331.53592:74 331.68756:205 331.84698:276 332.01157:186 332.07843:56 332.12988:74 332.28424:74 332.4129:37 332.70636:111 333.31168:3…	108153	138367	144085	132269	154668	491	831	325	511	553	672	197	399	141	281	757	405	421	566	491	751	639	673
17411	11.128	687.196	Flavone base + 3O, 2MeO, O-guaiacylglycerol-Hex	[M-H]-	TRUE	687.195	C33H36O16	TRUE	TRUE	TRUE	84.9	76.4	62.2	687.19116:14814 688.19451:5967 689.19787:2153	102.29315:3 135.04546:3 150.03247:43 150.04631:9 165.05093:87 165.05455:158 195.06419:272 293.28754:3 299.0173:25 313.05579:9 314.04047:71 328.06018:12 329.06818:1209 329.25769:7 371.08017:40 476.09436:15 477.12659:22 491.11966:298 523.49042:40 523.79401:9 524.62451:6 525.14191:2630 525.38129:32 525.56891:15 525.93463:9 526.06732:9 526.40082:6 526.72791:9 528.64087:6 687.20129:139 687.23456:77 68…	17558	18193	17301	17847	14814	233	113	138	140	118	198	47	135	112	24	81	90	88	37	32	87	105	260
13275	15.788	319.226	5,5-Bis(hydroxymethyl)-9-methyl-14-methylidenetetracyclo[11.2.1.01,10.04,9]hexadecan-3-one	[M+H]+	TRUE	319.227	C20H30O3	TRUE	TRUE	TRUE	79.2	76.7	68.1	319.22443:9798 320.22778:2614 321.23114:541	53.04975:4 55.05674:4 57.07219:3 67.05447:3 69.07608:7 77.04089:6 79.05731:7 81.03368:4 81.07308:16 91.05514:10 91.06726:7 93.07177:11 95.08571:17 97.10313:4 105.07181:24 107.08678:19 107.09992:6 109.06339:7 109.10172:11 109.11498:7 111.11758:4 115.0517:7 116.06683:6 117.06809:14 119.0866:60 121.06644:9 121.10061:39 123.07983:6 123.11584:50 125.10035:3 128.06052:4 129.07043:11 131.0844:21 132.055…	4615	4662	4265	4109	4102	9085	10153	10139	10119	10103	9798	14537	18149	15305	14973	14684	16628	8975	9408	9896	10342	10407	9721
40576	10.897	741.203	Flavone base + 3O, C-Pen-FeruloylHex	[M+H]+	TRUE	741.201	C36H36O17	TRUE	TRUE	TRUE	82.2	78.2	80.2	741.20361:64779 742.20696:31698 743.21032:7516	117.03561:37 134.02837:19 145.02545:262 177.05423:1719 177.39435:21 182.76225:19 195.06458:56 267.05624:19 271.05939:130 283.05988:204 305.0386:19 309.45248:19 313.05588:56 313.06836:280 313.09335:94 321.09369:241 336.0011:38 337.06796:396 337.09906:56 339.09491:74 339.10272:223 339.13132:130 349.05453:37 349.06509:130 351.08014:19 366.10654:38 367.07947:695 370.60901:38 385.08716:361 385.12314:9…	45672	55278	64779	67623	69552	1262	2181	1860	1421	2153	1553	1481	1964	1581	1745	1566	1366	1709	1733	2626	2245	1909	1927
3322	20.619	253.217	9-Trans-Palmitelaidic acid	[M-H]-	TRUE	253.217	C16H30O2	TRUE	TRUE	TRUE	62.7	81.6	79.1	253.21672:5901 254.22007:495 255.22343:742	59.02282:19 125.92739:19 199.84248:19 209.07108:9 222.10498:9 235.19951:19 253.21681:793	4685	5329	3973	3743	3823	6199	8342	5013	5939	5829	5901	8260	4180	5184	5580	5147	4821	5175	4495	4735	5436	4348	4728
4510	33.804	163.123	(-)-Nicotine	[M+H]+	TRUE	163.123	C10H14N2	TRUE	TRUE	TRUE	79.3	66.4	69.7	163.12358:1465 164.12693:279 165.13029:202	56.94571:19 67.93954:9 76.93327:19 77.04102:28 80.94357:28 84.08221:28 100.95435:19 106.06644:19 115.05582:28 117.05695:74 117.07528:28 120.091:19 130.06595:84 132.08112:37 135.04185:19	662	774	1229	1750	1179	2146	1160	948	628	587	432	1041	1226	628	552	424	370	1465	1053	505	531	543	365
7596	8.39	385.112	1-o-sinapoylglucose	[M-H]-	TRUE	385.113	C17H22O10	TRUE	TRUE	TRUE	90.7	84.3	84	385.11166:7237 386.11501:1499 387.11837:869	71.01942:19 89.02141:37 147.01665:19 149.02228:56 164.04721:111 165.15178:9 175.00571:65 177.04681:9 179.06575:47 190.02609:395 191.13672:19 205.04994:949 206.05362:37 208.05203:19 221.0795:19 223.05869:158 229.53854:9 237.07727:28 247.06836:37 247.08167:46 265.06158:28 265.06619:37 325.07608:19 385.11987:19	7237	7547	6933	6351	7568	1563	1710	1372	1283	1172	1331	1174	1630	1387	1251	1638	1413	1967	2065	2034	2103	1989	1880
4998	16.802	311.164	Triptophenolide	[M-H]-	TRUE	311.165	C20H24O3	TRUE	TRUE	TRUE	60.2	71.4	71.2	311.16617:67976 312.16952:14153 313.17288:5303	79.95898:37 119.04938:204 142.19569:19 161.10403:19 169.99995:429 182.43314:93 183.00932:6144 183.15446:158 183.24998:70 183.35126:56 184.01503:204 184.03226:56 195.14536:19 197.02888:204 198.03064:74 212.04028:56 212.04851:74 223.94658:37 225.05261:111 226.05948:111 239.06522:93 240.07887:56 247.20789:74 250.20834:19 253.08319:93 254.09236:37 267.10361:37 282.20575:19 293.20096:37 310.18347:223 …	67290	64594	64023	75449	67259	79463	66860	65291	62327	64401	65760	68725	71281	64238	65441	66921	69311	67898	67976	64619	63549	63044	68273
6451	12.288	209.154	9-Epiblumenol B	[M-H2O+H]+	TRUE	209.153	C13H22O3	TRUE	TRUE	TRUE	72.8	63.8	61.8	209.15201:728 210.15536:149 211.15872:71	51.04165:1 55.06183:3 57.07947:3 65.04888:3 67.05524:6 67.07835:1 69.06977:4 71.05105:4 77.04028:7 79.05413:4 81.03678:3 83.04913:6 85.03279:3 91.05418:7 93.0694:9 95.05025:4 103.05323:3 105.06761:4 106.03923:9 107.04891:4 109.06493:20 109.10031:4 115.05166:3 117.03442:3 119.0834:3 121.06162:7 121.10045:9 123.08119:6 128.06181:3 131.08403:6 133.10051:6 135.07988:10 135.12418:3 137.05898:3 139.105…	634	714	728	772	708	241	257	272	305	254	225	235	226	271	277	347	257	245	253	310	288	257	213
13077	17.335	317.21	6,18,19-Trihydroxytrachyloban-2-one	[M-H2O+H]+	TRUE	317.211	C20H30O4	TRUE	TRUE	TRUE	82.3	80	71.3	317.21021:20840 318.21356:5889 319.21692:5865	57.07502:9 79.05661:19 81.07235:28 83.04784:28 83.062:19 91.05693:37 93.06812:28 95.08475:37 97.1063:28 105.06923:37 107.08415:37 109.06513:46 111.07915:19 115.05645:28 115.06857:19 117.07439:37 119.08523:130 121.10386:56 123.08152:37 128.05899:28 129.0705:37 131.08443:139 132.06073:28 133.06346:19 133.10092:139 135.07866:139 135.11804:65 137.1371:37 141.06587:37 142.07861:28 143.08652:65 144.091…	4760	3863	4124	4037	4090	7883	8817	8628	8401	8361	9009	15605	20840	14758	16680	14725	14724	8783	8616	10432	9938	11060	9470
25785	7.73	485.161	Forsythoside E	[M+Na]+	TRUE	485.16	C20H30O12	TRUE	TRUE	TRUE	86.1	75	75	485.16077:539 486.16412:196 487.16748:153	485.15607:65 485.18716:37	95	159	178	178	200	283	325	380	411	442	468	496	539	534	613	583	720	303	276	384	400	499	486
42269	11.598	775.207	Flavone base + 3O, 2MeO, O-MalonylHex, O-guaiacylglycerol	[M+H]+	TRUE	775.208	C36H38O19	TRUE	TRUE	TRUE	89.5	91.4	85.2	775.20654:23706 776.20989:11386 777.21325:3088	141.86127:9 179.0721:19 269.04001:9 315.04562:74 318.80231:9 329.06552:74 330.07001:19 331.08118:1568 332.08871:19 461.29794:9 479.13245:46 491.13916:19 493.14322:56 509.15063:28 509.17929:19 525.47198:19 526.60504:19 527.15588:1275 528.14801:37 528.53088:19 533.1261:37 535.13232:19 562.1554:19 575.64557:19 577.11627:659 578.12726:111 579.12885:384 580.14496:19 595.14893:19 628.24811:9 689.19916:…	14761	18126	19444	21940	23706	53	54	28	61	72	89	92	36	95	51	30	64	54	83	68	49	40	38
6939	6.493	220.119	Pantothenic acid	[M+H]+	TRUE	220.118	C9H17NO5	TRUE	TRUE	TRUE	87.7	91.7	82	220.11708:8326 221.12043:1642 222.12379:368	57.0722:12 59.05334:15 65.04236:3 67.05788:19 69.07951:9 70.03306:28 72.0448:59 74.02794:6 85.07113:28 86.09751:9 90.05817:90 95.05098:22 96.15649:3 98.02576:50 98.03835:19 100.04007:6 100.66223:3 113.05832:12 116.0374:12 124.07562:111 142.08125:6 142.0863:40 142.10146:12 156.09819:6 160.09677:9 177.93677:3 184.09918:34 202.10864:31 220.1178:9	3052	4390	4654	5450	6236	4721	5825	6723	7579	7665	9318	5209	6814	7178	8326	8014	8807	4099	4676	6343	6770	7679	7291
8201	6.443	247.181	sophocarpine	[M+H]+	TRUE	247.18	C15H22N2O	TRUE	TRUE	TRUE	94.8	86.8	96.6	247.18065:1472 248.184:348 249.18736:6539	81.03576:3 84.08426:3 86.10506:3 93.06976:3 96.08278:6 96.09247:3 109.06102:3 110.09533:3 114.09132:3 121.0638:3 122.09882:4 126.94682:3 136.11287:40 136.13757:3 136.91769:3 138.12605:3 144.91452:4 148.11118:7 150.12961:13 151.1344:3 156.00757:3 161.13182:3 162.08644:4 166.08592:3 167.09523:1 173.09456:3 176.10675:6 179.15059:40 179.17514:20 188.90388:4 191.08493:3 201.09557:4 205.11882:3 221.068…	65	60	76	84	94	175	211	383	1472	216	215	95	108	90	162	102	108	104	77	101	115	96	82
5995	7.4	199.059	Syringic acid	[M+H]+	TRUE	199.06	C9H10O5	TRUE	TRUE	TRUE	84.1	92.1	68	199.06134:1490 200.06469:270 201.06805:211	69.07216:19 75.02686:6 77.04044:31 95.0466:12 95.06724:19 121.0284:19 125.02379:74 140.04091:19 140.04591:124 181.06854:12	671	859	893	924	919	844	902	955	1150	1169	1102	1399	1451	1422	1493	1490	1692	1220	1166	1436	1672	1604	1637
14978	7.727	339.108	3-p-coumaroylquinic acid	[M+H]+	TRUE	339.107	C16H18O8	TRUE	TRUE	TRUE	88.5	80.7	87.1	339.10712:2842 340.11047:541 341.11383:415	91.07045:19 119.04868:74 120.08436:19 145.08835:37 147.04338:353 165.06953:19	1094	1388	1339	1486	1509	2777	2877	3002	3174	3474	3696	2267	2951	2520	2879	2622	2842	2055	2119	2378	2857	2795	2540
4953	24.997	309.279	Eicosenoic acid	[M-H]-	TRUE	309.28	C20H38O2	TRUE	TRUE	TRUE	63	84.4	81.4	309.27802:13746 310.28137:3492 311.28473:485	291.2691:19 308.31067:60 309.26556:102 309.28046:3037	4243	4484	4507	4610	3566	10924	12651	9187	10759	10370	13910	12919	8470	8504	12712	12915	12635	13761	11226	10174	11180	13746	10565
11711	13.165	301.07	Diosmetin	[M+H]+	TRUE	301.071	C16H12O6	TRUE	TRUE	TRUE	91.7	84.9	86.6	301.06909:1402 302.07244:397 303.0758:635	258.04028:19 286.04303:130 299.15286:6 301.06998:155	850	894	933	953	1014	1186	1241	1402	1452	1461	1290	738	752	756	687	773	708	1356	1566	1605	2107	1659	1408
2903	19.284	227.202	Myristic acid	[M-H]-	TRUE	227.202	C14H28O2	TRUE	TRUE	TRUE	65.2	87.8	76.4	227.20221:7047 228.20556:1110 229.20892:278	209.19185:19 227.20155:389	1996	12506	1087	13309	13661	4664	10391	7152	8174	9442	10610	8452	6499	6910	7047	8100	10947	11435	9341	7300	8620	9597	9369
3321	20.386	253.217	Palmitoleic acid	[M-H]-	TRUE	253.217	C16H30O2	TRUE	TRUE	TRUE	65.1	85.3	79.6	253.21661:8978 254.21996:1136 255.22332:757	155.87805:9 199.83624:28 217.84465:19 253.214:567	3762	3445	3452	5217	3779	9044	8973	7703	8750	9319	9660	10687	8478	8123	8061	7637	6611	10049	7873	8232	8978	8580	7193
32198	8.934	587.136	Isoshaftoside	[M+Na]+	TRUE	587.138	C26H28O14	TRUE	TRUE	TRUE	81.1	71.6	78.2	587.13623:3714 588.13958:1203 589.14294:462	377.07751:19 467.11783:37 485.09143:19 509.11465:37 527.11603:19 533.14471:19 567.71027:19 569.13043:167 569.16406:132 587.08331:38 587.14148:397	1599	2753	2291	2911	3714	38	57	50	52	77	96	68	56	69	82	50	65	55	28	101	84	169	74
3733	14.521	144.082	1-Naphthylamine	[M+H]+	TRUE	144.082	C10H9N	TRUE	TRUE	TRUE	82.7	79.5	80.1	144.07913:585 145.08248:225 146.08584:81	74.0764:19 117.07022:19 144.0798:56	303	280	175	315	303	485	497	550	486	499	417	280	480	267	297	284	246	545	585	640	569	760	491
27645	17.695	515.258	Lucidenic acid D	[M+H]+	TRUE	515.26	C29H38O8	TRUE	TRUE	TRUE	86.1	75	75	515.25952:2018 516.26287:873 517.26623:261	515.26733:173	637	640	675	574	528	1948	1781	1918	1979	2018	2048	940	814	819	926	957	1186	470	316	483	578	705	567
16779	18.383	360.254	Napelline	[M+H]+	TRUE	360.253	C22H33NO3	TRUE	TRUE	TRUE	81.2	60.2	75	360.25327:6463 361.25662:1830 362.25998:463	173.09274:19 360.24365:37	1767	2107	2357	2964	2985	6421	6912	7199	7169	7224	6463	5415	8001	5436	6507	5967	5801	8636	7651	8342	9686	9701	7477
4724	8.608	169.077	Norharman	[M+H]+	TRUE	169.076	C11H8N2	TRUE	TRUE	TRUE	81.8	76.1	81.2	169.07657:1278 170.07992:193 171.08328:256	57.03835:9 77.04581:19 82.07884:9 111.0098:28 115.05397:37 132.91745:9 141.05124:19 142.0656:28 168.08743:19 169.07526:111	686	786	804	789	747	1278	1276	1542	1381	1090	1624	1268	1384	1238	1484	1366	1450	1222	1303	1327	1423	1485	1401
15627	10.044	347.076	3,5,7-Trihydroxy-2-(4-hydroxy-3-methoxyphenyl)-8-methoxy-4H-chromen-4-one	[M+H]+	TRUE	347.077	C17H14O8	TRUE	TRUE	TRUE	77.2	63.4	77.8	347.07608:3404 348.07943:1124 349.08279:306	137.04291:19 153.05582:56 165.01213:37 203.04129:19 221.04689:19 243.90028:19 284.03882:19 287.04654:37 291.0903:19 303.04477:37 315.05185:56 332.05402:37 347.07419:223 347.09262:37	2104	2773	2583	3404	2943	99	96	203	148	114	113	97	139	94	106	111	113	155	120	110	93	127	106
3746	23.501	269.249	Heptadecanoic acid	[M-H]-	TRUE	269.249	C17H34O2	TRUE	TRUE	TRUE	63.7	86.9	77.4	269.24948:30527 270.25283:4787 271.25619:177	59.0156:148 184.03459:19 191.04683:37 200.80771:19 209.06325:37 226.16661:19 251.23105:56 254.14552:19 269.24786:3783	11198	11434	12802	12160	11382	26815	30253	18312	22862	25781	30527	23034	18820	18592	21557	23391	23268	20797	21660	17503	19723	25465	22781
23802	1.016	455.211	Kushenol I	[M+H]+	TRUE	455.21	C26H30O7	TRUE	TRUE	TRUE	86.4	76.4	75	455.21149:500 456.21484:382 457.2182:382	212.92517:19 300.95163:19 355.90131:19 453.65158:38 454.46667:38 455.11688:735	26	181	140	171	489	249	500	249	81	246	347	363	127	117	250	247	196	178	122	473	364	85	330
3880	0.91	148.061	Glutamic acid	[M+H]+	TRUE	148.06	C5H9NO4	TRUE	TRUE	TRUE	89.7	85.1	85.8	148.06027:19286 149.06362:3091 150.06698:1135	53.38124:38 56.05293:389 58.99784:19 68.053:19 72.93618:19 84.04652:2201 84.55454:37 85.03156:93 85.04978:56 102.05415:93	15645	17708	18389	19286	18732	15497	17482	17124	18438	19439	19331	14332	14738	15306	15295	15263	16950	18432	16630	18080	20359	20286	19940
9155	9.444	431.096	Pelargonidin-3-O-glucoside	[M-2H]-	TRUE	431.098	C21H21O10	TRUE	TRUE	TRUE	90.6	94.3	83.1	431.09497:5124 432.09832:1662 433.10168:294	225.04807:12 241.07008:6 269.04855:982 283.05893:19 301.07504:6 311.05771:56 325.2352:6 383.08252:6 431.09674:462 431.1319:100	5071	5124	5208	4800	5617	105	130	186	273	95	117	200	198	127	191	224	68	302	167	287	272	106	264
4072	23.071	281.25	Trans-Vaccenic acid	[M-H]-	TRUE	281.249	C18H34O2	TRUE	TRUE	TRUE	63.6	82.5	75	281.24954:158708 282.25289:29468 283.25625:5290	141.09877:19 149.00587:37 189.04036:19 191.05421:56 237.98857:56 263.23346:56 264.24658:50 280.35965:111 281.23001:114 281.24658:18471 281.42413:778 281.52121:114 281.54254:342 281.67517:134	146945	123837	120013	132641	116332	175919	172160	149634	138557	129242	129378	158708	140802	125901	115919	111820	104876	156478	137220	132704	128845	116087	114216
9111	6.766	265.191	Oxymatrine	[M+H]+	TRUE	265.19	C15H24N2O2	TRUE	TRUE	TRUE	96.8	96.3	96.5	265.19089:5274 266.19424:1189 267.1976:213	98.10244:14 119.07185:5 122.09586:9 132.07909:14 133.09164:14 136.11139:51 137.11778:28 148.11476:51 150.12976:37 161.08359:14 162.12613:9 176.09752:9 177.13489:19 192.1617:19 205.13715:121 206.19179:23 219.15039:14 220.20062:19 232.13599:5 247.17015:19 247.18124:125 248.18533:42 265.19159:615	70	85	83	126	160	262	308	1124	5274	320	385	141	121	137	133	127	104	83	74	125	141	118	107
27306	22.17	509.322	Quillaic acid	[M+Na]+	TRUE	509.32	C30H46O5	TRUE	TRUE	TRUE	84.1	88	72.6	509.32172:995 510.32507:348 511.32843:145	509.33282:111	862	993	911	1004	1018	807	687	611	684	835	1351	731	663	766	495	786	824	675	738	854	749	786	995
14792	0.97	337.109	4'-hydroxy-2',4,6'-trimethoxychalcone	[M+Na]+	TRUE	337.11	C18H18O5	TRUE	TRUE	TRUE	79.8	61.5	84.9	337.108:3205 338.11135:960 339.11471:740	124.04102:19 127.02208:37 174.49837:19 185.02147:37 241.04909:19 245.04973:56 248.96077:19 337.10675:167 337.13007:74	1995	2700	2741	1546	2536	2252	2725	2723	2813	2770	3229	2419	2326	2529	3205	2516	2913	2093	2284	2265	2374	2751	2183
23918	23.499	457.148	5-(2-ethyl-2,3,4,9-tetrahydro-1H-beta-carbolin-1-yl)-2,6-dihydroxy-3-(3-methoxyphenyl)pyrimidin-4(3H)-one	[M+Na]+	TRUE	457.15	C23H22N4O5	TRUE	TRUE	TRUE	86.1	75	75	457.1496:620 458.15295:0 459.15631:0	457.29565:132 457.34396:244	373	431	620	749	624	556	481	325	210	226	254	596	504	331	266	253	200	350	229	387	171	236	235
14988	23.236	339.159	Bergamottin	[M+H]+	TRUE	339.16	C21H22O4	TRUE	TRUE	TRUE	78.6	68.7	78.4	339.15701:1093 340.16036:208 341.16372:138	185.00481:19 339.22992:37	283	621	533	594	811	1093	881	1138	1138	949	1267	1051	1126	1132	994	723	1122	1024	979	1248	953	1195	947
7075	7.569	371.096	Dihydroferulic acid 4-O-glucuronide	[M-H]-	TRUE	371.097	C16H20O10	TRUE	TRUE	TRUE	86.3	73.7	75.6	371.09613:16043 372.09948:2980 373.10284:837	59.01578:25 71.01411:31 73.00346:12 75.00686:12 75.0093:43 77.0448:49 85.02665:43 85.02925:56 89.02252:12 93.31864:6 99.00663:25 109.03582:12 111.04349:6 113.02444:124 115.00626:12 117.02363:25 117.06638:13 121.03022:505 127.26208:6 132.00578:19 151.03751:6 157.01045:19 173.04691:6 175.02621:37 187.06117:6 189.03732:31 220.98187:6 231.05193:99 249.0618:635 311.07953:12 371.10382:204 371.13101:87	27489	26441	25327	24250	27458	22384	21407	14469	16043	15484	18953	22973	20061	15502	18484	19259	19938	26922	26809	22310	24730	23530	26241
30542	8.416	561.196	(1S,2S,4S,7R,9S,12S,13S,16S)-4-(furan-3-yl)-12-hydroxy-2,16-dimethyl-13-[(2S,3R,4S,5S,6R)-3,4,5-trihydroxy-6-(hydroxymethyl)oxan-2-yl]oxy-5,10-dioxatetracyclo[7.6.1.02,7.012,16]hexadecane-6,11-dione	[M+Na]+	TRUE	561.194	C26H34O12	TRUE	TRUE	TRUE	87.5	96.9	74.3	561.19257:883 562.19592:450 563.19928:363	399.13455:19 561.18677:136	419	495	544	548	493	780	917	966	1048	1097	1382	1048	1187	1379	1269	1311	1505	651	762	963	796	1063	883
4613	18.732	297.245	FA 18:1+1O	[M-H]-	TRUE	297.244	C18H34O3	TRUE	TRUE	TRUE	93.5	79	92.5	297.2439:20248 298.24725:4368 299.25061:1344	125.78137:9 127.11295:28 141.09085:28 153.12794:19 155.10262:74 155.12547:19 171.10246:158 181.1602:9 183.01332:46 184.02286:19 185.11581:37 243.83279:19 253.24228:19 253.24902:56 261.21008:28 261.2215:28 279.23029:348 279.25388:112 289.85541:9 295.22418:28 296.30191:19 297.14554:102 297.24045:1906 297.54712:19	20775	20663	20248	26534	20075	24408	21499	17787	18530	16694	17764	20098	18343	16363	16674	15338	17740	21401	22113	17973	18008	15965	18719
23784	9.779	455.088	Genistin	[M+Na]+	TRUE	455.09	C21H20O10	TRUE	TRUE	TRUE	90.7	85.5	85.5	455.08578:925 456.08913:284 457.09249:286	293.0401:37 455.10458:74	925	1250	1410	1862	1788	135	150	98	110	161	204	134	115	121	106	84	137	153	149	156	154	186	166
13250	8.083	563.139	8-[3,4-Dihydroxy-5-(hydroxymethyl)oxolan-2-yl]-5,7-dihydroxy-2-(4-hydroxyphenyl)-6-[3,4,5-trihydroxy-6-(hydroxymethyl)oxan-2-yl]chromen-4-one	[M-H]-	TRUE	563.141	C26H28O14	TRUE	TRUE	TRUE	94.9	94.8	88.9	563.13788:17168 564.14123:5309 565.14459:1895	57.07675:1 115.00459:1 161.02277:3 173.04918:1 177.04715:1 191.02979:3 213.05362:3 218.53545:1 221.06319:3 225.08739:3 234.04291:3 253.08844:3 259.01913:3 263.07367:3 267.06741:3 281.0647:4 283.05582:3 295.06055:3 296.06027:4 297.07626:16 307.05731:3 309.09613:3 311.0546:11 322.0531:3 323.05438:9 324.06229:4 325.07175:16 335.05386:6 337.05908:3 337.0824:6 339.11703:1 341.06918:4 351.04089:6 351.9…	17168	17463	16400	14629	15590	188	168	296	150	159	119	317	248	86	269	199	132	138	216	169	254	81	244
3386	32.457	255.234	Palmitic Acid	[M-H]-	TRUE	255.233	C16H32O2	TRUE	TRUE	TRUE	64.1	85.4	81.9	255.23396:7031 256.23731:1119 257.24067:279	255.1416:19 255.23178:627	7031	4956	4524	4336	4189	4409	2919	3770	2859	2995	3156	3310	3124	3087	3168	3529	2553	3655	3875	3085	3417	3024	2712
15710	1.021	348.069	Adenosine 3'-monophosphate	[M+H]+	TRUE	348.07	C10H14N5O7P	TRUE	TRUE	TRUE	85.4	68.1	84.5	348.07315:4908 349.0765:3010 350.07986:430	97.0295:56 119.04:19 136.06073:565 182.06448:19 212.83565:37 283.84628:19 348.06598:37	3695	3508	5135	4908	4084	5846	4445	5738	7000	5354	6678	3979	4709	4838	7126	4353	5399	3482	5174	4836	5769	7942	6325
4719	6.188	169.051	vanillic acid	[M+H]+	TRUE	169.05	C8H8O4	TRUE	TRUE	TRUE	76.3	64.8	75.5	169.0473:1341 170.05065:1577 171.05401:3930	65.03983:56 67.06224:6 70.06468:6 81.07892:12 91.05852:12 93.03431:25 98.0575:12 109.02708:12 111.00654:12 111.08091:6 123.04893:6 134.93958:6 151.03548:25 169.07161:25 169.0808:25	393	530	575	653	637	755	891	1048	1069	926	1153	1025	1098	1341	1158	1080	1312	1068	1003	1127	1285	1437	1224
33451	22.24	607.252	4E,15Z-Bilirubin IXa	[M+Na]+	TRUE	607.25	C33H36N4O6	TRUE	TRUE	TRUE	76.7	66	74.6	607.25391:1891 608.25726:800 609.26062:288	505.53214:9 542.23737:9 571.45618:9 607.25391:176	1756	1891	1537	1850	1918	122	175	149	273	165	114	128	87	142	142	167	95	208	268	247	330	225	179
16143	23.116	353.268	2-Monolinolenin	[M+H]+	TRUE	353.269	C21H36O4	TRUE	TRUE	TRUE	76.8	63	76.5	353.26785:53345 354.2712:10296 355.27456:1764	57.07311:19 99.08683:19 109.10313:56 123.13304:37 145.10129:19 147.14029:19 149.13145:37 165.12506:93 184.07759:19 227.1615:19 291.23297:223 336.29739:19 353.25122:57 353.2645:470	21451	21471	22670	19748	21232	32031	29188	30358	36058	45543	53345	25698	22836	28096	35072	44301	49219	28522	30528	26229	40694	45861	44104
11956	21.138	303.252	2-Myristoylglycerol	[M+H]+	TRUE	303.253	C17H34O4	TRUE	TRUE	TRUE	73.3	60.2	67.8	303.24915:5775 304.2525:1473 305.25586:987	57.07349:56 67.06502:19 71.08971:46 77.04216:9 79.46447:9 81.07052:19 85.10513:37 95.08551:28 109.10133:28 119.09069:9 137.13469:19 145.86139:19 165.08932:9 201.12224:19 285.24304:28 303.2283:19	3868	3544	3595	4271	3431	4158	4467	4817	4916	6265	7547	4135	4256	4677	5432	6097	7854	4672	4679	4507	5775	8084	6659
12570	10.024	312.125	Feruloyl dehydrotyramine	[M+H]+	TRUE	312.124	C18H17NO4	TRUE	TRUE	TRUE	84.3	86	80.1	312.12714:3810 313.13049:1527 314.13385:405	117.0321:56 137.05992:9 145.02853:204 149.0611:19 177.05223:241 178.05849:19 312.12589:19	828	1049	940	856	1022	3057	3160	3377	3810	3492	3912	4135	4142	3771	4594	4237	4662	2969	3025	3180	4375	3678	3269
10016	9.658	461.111	Flavone base + 3O, 1MeO, O-Hex	[M-H]-	TRUE	461.109	C22H22O11	TRUE	TRUE	TRUE	89.9	87.4	85.3	461.10767:22500 462.11102:5265 463.11438:1785	150.99655:19 240.04305:37 251.03198:19 268.03546:37 283.02344:56 284.03113:286 285.0358:56 298.04623:74 298.09985:56 298.12421:114 299.05588:3520 299.24384:54 299.37082:40 309.04761:19 313.03781:37 321.0925:19 339.99747:37 341.06534:204 444.6994:19 446.09045:56 459.92374:43 461.108:2973 461.28076:39	23365	24889	21988	24538	22500	445	325	161	87	184	360	169	320	199	141	179	227	350	379	252	460	146	257
7410	14.788	230.247	N,N-Dimethyldodecylamine N-oxide	[M+H]+	TRUE	230.248	C14H31NO	TRUE	TRUE	TRUE	85.7	80.4	72.2	230.24747:6605 231.25082:1117 232.25418:42	55.05799:9 57.07347:37 62.06086:19 71.08508:28 85.10155:19 212.23985:65 230.24406:214 230.26549:46	482	340	383	946	1281	442	4486	1751	2976	4396	16100	1527	4677	5773	5780	6605	15671	840	3787	4096	4399	4588	15042
18871	24.848	387.255	Bufalin	[M+H]+	TRUE	387.253	C24H34O4	TRUE	TRUE	TRUE	81.8	62.7	75	387.25455:596 388.2579:326 389.26126:27	337.2821:9 369.1666:9 387.24982:84	415	474	473	532	596	151	139	165	291	264	153	131	129	234	132	196	322	171	198	169	274	334	260
3085	20.785	241.216	Pentadecanoic acid	[M-H]-	TRUE	241.217	C15H30O2	TRUE	TRUE	TRUE	64	86.4	80	241.21643:16616 242.21978:2740 243.22314:0	223.20462:28 226.04343:19 241.21626:1293	6630	6757	6932	7002	6291	14983	16616	11374	10579	15303	17116	12287	10824	10336	11396	10921	14549	12596	12120	9812	12249	7641	11961
8234	17.844	248.071	1-hydroxy-10-methylacridone	[M+Na]+	TRUE	248.07	C14H11NO2	TRUE	TRUE	TRUE	88.3	76.1	87.5	248.0665:450 249.06985:171 250.07321:99	164.05804:9 191.07108:28 220.07272:19 248.06976:167	367	434	402	498	396	464	476	471	487	450	432	441	446	445	432	451	384	464	460	469	477	461	473
963	7.792	109.03	Catechol	[M-H]-	TRUE	109.029	C6H6O2	TRUE	TRUE	TRUE	89.5	88	80	109.02936:733 110.03271:97 111.03607:291	109.02973:19	3792	3870	3836	3571	4348	557	460	540	382	155	256	733	401	451	272	276	324	695	626	531	456	559	252
11710	9.987	301.069	Tectorigenin	[M+H]+	TRUE	301.07	C16H12O6	TRUE	TRUE	TRUE	90.4	79.4	87.9	301.0705:973 302.07385:68 303.07721:393	181.87033:19 284.11377:19 286.05139:111 301.06143:37 301.06387:130	20547	22113	24372	29595	25285	396	474	480	597	537	484	389	358	450	460	476	378	653	666	689	973	760	784
4487	16.504	293.213	13(S)-Hpode	[M-H-H2O]-	TRUE	293.212	C18H32O4	TRUE	TRUE	TRUE	90.2	69	87.9	293.21243:4771 294.21578:805 295.21914:16100	113.09872:19 125.09541:28 149.09616:19 163.11925:9 173.94864:9 179.14513:19 185.11453:46 195.13828:19 199.13733:19 221.1492:19 235.06975:9 249.21234:19 275.2251:9 293.20929:335 293.23346:84	3699	3667	3692	4160	3717	7224	7231	6684	6492	6530	6280	4564	3957	4727	4229	4852	4210	4771	5108	4699	4578	5198	5336
10015	10.493	461.109	Peonidin-3-glucoside	[M-2H]-	TRUE	461.107	C22H23O11	TRUE	TRUE	TRUE	85.9	73.7	75.1	461.10873:2652 462.11208:1116 463.11544:93	257.14703:19 272.10379:19 283.02567:74 284.03333:37 285.04279:19 298.0386:37 299.04333:56 299.07507:37 417.08478:19 446.09131:111 460.633:56 461.1087:360	2386	2570	2652	2054	2575	203	198	145	117	147	88	107	47	56	120	72	159	236	165	53	159	88	166
8301	6.245	249.195	Matrine	[M+H]+	TRUE	249.196	C15H24N2O	TRUE	TRUE	TRUE	94.1	93.8	90.7	249.1951:9381 250.19845:1547 251.20181:286	96.07862:6 98.06033:6 100.07498:9 108.08147:6 110.09531:22 112.07693:28 114.09281:6 120.07959:15 121.10574:9 122.09724:34 124.11127:9 131.08313:12 133.08659:9 134.09648:22 136.1145:25 136.12933:9 138.09286:9 138.12605:31 146.09616:9 148.07852:12 148.11288:229 149.0954:6 150.08809:9 150.12787:121 150.14343:34 152.14427:25 160.11034:12 162.09183:12 164.10359:6 166.12411:9 176.10674:87 176.14233:15 …	179	190	220	234	214	630	756	2054	9381	647	623	121	137	132	123	145	88	134	137	138	203	143	136
21937	18.171	429.122	6,7-dimethoxy-1-phenyl-8H-benzo[c]indolo[3,2,1-ij][1,5]naphthyridin-8-one	[M+Na]+	TRUE	429.12	C26H18N2O3	TRUE	TRUE	TRUE	77.6	67.2	76.5	429.11685:685 430.1202:218 431.12356:0	132.08682:19 385.12833:19 429.12363:74	690	744	739	635	685	594	494	472	589	582	840	438	453	514	553	475	1664	573	457	375	151	100	1209
13881	9.185	327.161	Licarin A	[M+H]+	TRUE	327.16	C20H22O4	TRUE	TRUE	TRUE	81.5	65.4	86.3	327.15836:973 328.16171:477 329.16507:227	129.06401:19 137.061:74 174.98785:19 327.07275:56	578	723	810	975	843	612	632	748	772	810	828	780	973	885	942	996	1082	521	608	725	799	880	687
4807	20.959	303.232	Arachidonic acid	[M-H]-	TRUE	303.233	C20H32O2	TRUE	TRUE	TRUE	63.1	82.8	71.6	303.23166:4139 304.23501:1610 305.23837:496	228.93025:9 259.24002:19 303.19739:19 303.23178:93 303.25635:46	1703	1188	1163	1109	1248	3526	2738	2334	2190	2250	2504	2040	1925	1664	1751	1971	1923	4139	3159	2919	2545	2585	2119
4127	5.845	153.041	Oxypurinol	[M+H]+	TRUE	153.041	C5H4N4O2	TRUE	TRUE	TRUE	80.3	68.8	79.7	153.03865:772 154.042:186 155.04536:156	65.04346:6 69.83471:6 81.00802:12 83.07406:6 95.06877:6 110.03638:37 136.01445:68 139.1469:6 153.04268:19	394	456	402	480	465	606	718	808	772	818	921	642	700	797	770	743	832	615	555	719	686	815	754
16469	16.123	357.202	4'-ethenyl-2'-hydroxy-1,4',4a-trimethyl-5-oxospiro[2,3,4,7,8,8a-hexahydronaphthalene-6,1'-cyclopentane]-1-carboxylic acid	[M+Na]+	TRUE	357.204	C20H30O4	TRUE	TRUE	TRUE	86.3	87.8	73.5	357.20398:2258 358.20733:543 359.21069:184	339.18796:12 357.20239:204	593	558	631	680	670	1375	1318	1322	1432	1387	1701	2258	2828	2154	2255	2509	2718	1433	1360	1747	1431	1646	1666
16462	11.846	659.365	(3R)-3-[(3R)-3-[[(3R)-4-[[(4S,6R)-4,5-dihydroxy-3-methyl-2,7-dioxabicyclo[4.1.0]heptan-3-yl]oxy]-6-hydroxy-2,8-dioxabicyclo[4.2.1]nonan-3-yl]oxy]decanoyl]oxydecanoic acid	[M-H]-	TRUE	659.368	C33H56O13	TRUE	TRUE	TRUE	92.4	90.5	86.8	659.36542:9673 660.36877:3549 661.37213:1301	89.02817:37 101.02518:19 113.03025:19 119.03664:46 131.05498:9 161.04407:37 179.05452:56 495.75534:9 657.26233:28 658.13824:20 659.33008:83 659.36267:2724 659.63092:42	9673	7550	8010	9446	8234	74	79	46	146	62	191	87	36	56	118	168	37	63	53	139	96	63	58
28389	10.295	527.158	Flavone base + 3O, 2MeO, O-guaiacylglycerol	[M+H]+	TRUE	527.156	C27H26O11	TRUE	TRUE	TRUE	82.9	82.2	73.4	527.15814:11849 528.16149:3247 529.16485:846	245.17981:19 270.05054:37 315.04825:56 316.06625:38 318.12735:19 330.08295:39 331.0813:1343 331.4538:21 525.49786:38 527.15265:262 527.19476:56	8335	10053	10594	11531	11849	146	158	258	268	298	286	44	270	303	503	274	179	114	304	233	220	172	84
1159	8.445	121.029	3-Hydroxybenzaldehyde	[M-H]-	TRUE	121.029	C7H6O2	TRUE	TRUE	TRUE	71.5	93.2	95.2	121.02956:16886 122.03291:1107 123.03627:340	65.00703:13 65.0389:32 70.00666:11 78.01408:5 79.02087:11 91.02039:85 91.74358:19 92.02769:1220 92.09135:8 92.13198:10 92.20786:8 92.75487:13 92.81605:5 93.03647:222 95.00996:21 95.02647:11 108.02249:66 112.14808:3 119.01513:8 120.02118:426 120.65289:13 121.02992:1348 121.11378:10	7720	7799	6881	8082	7248	23401	23912	16886	22635	24601	25233	17833	12255	10318	13510	13767	15019	23457	22299	18205	21053	23489	23626
33455	25.398	607.293	lappaconitine	[M+Na]+	TRUE	607.29	C32H44N2O8	TRUE	TRUE	TRUE	83.7	68.2	75	607.28815:245588 608.2915:99158 609.29486:26190	157.1165:19 177.05156:37 380.17236:19 400.12192:19 416.19308:37 417.22748:37 419.21637:37 431.18146:37 433.22678:93 433.25616:37 445.19519:149 446.20538:56 447.21671:74 448.22021:19 459.21518:186 460.22299:265 461.22583:362 462.22977:37 473.2345:130 474.24835:37 484.40601:19 487.24026:74 489.22385:56 491.24277:56 492.24753:37 503.2377:37 505.21548:56 506.26938:37 515.23956:111 518.22034:37 519.23…	176130	245588	236509	278314	268383	410	97	142	106	242	183	272	228	100	142	115	229	395	250	290	277	139	91
20043	9.184	755.186	Quercetin 3-O-[2''-O-(6'''-O-p-coumaroyl)-b-D-glucopyranosyl]-a-L-rhamnopyranoside	[M-H]-	TRUE	755.183	C36H36O18	TRUE	TRUE	TRUE	86.1	62.2	75	755.18616:5937 756.18951:1881 757.19287:792	157.04692:9 265.07706:19 309.03549:28 357.06042:19 429.07623:84 609.1485:74 635.14221:56 693.00299:9 695.54297:28 737.17188:9 752.79297:28 754.74988:20 755.18811:1238	5198	5012	5842	5214	5937	70	102	33	56	85	147	87	62	31	35	99	214	86	95	115	66	84	77
32657	9.114	595.164	8-[4,5-dihydroxy-6-(hydroxymethyl)-3-[3,4,5-trihydroxy-6-(hydroxymethyl)oxan-2-yl]oxyoxan-2-yl]-5,7-dihydroxy-2-(4-hydroxyphenyl)chromen-4-one	[M+H]+	TRUE	595.166	C27H30O15	TRUE	TRUE	TRUE	89.2	68.9	98.1	595.16608:38832 596.16943:11916 597.17279:2735	145.04733:37 249.06297:19 268.06851:19 271.06036:111 283.05603:640 283.09167:123 287.05252:19 295.0592:93 309.07098:74 311.05438:37 313.06909:1157 314.10141:37 323.06519:37 323.08801:93 330.91113:19 333.07407:37 335.09415:39 337.07114:869 349.06558:130 351.08063:130 351.91687:19 355.08026:74 361.0766:130 361.10611:19 366.12854:57 367.07986:1048 368.08658:37 374.14212:19 377.11304:38 379.07547:518…	30383	38832	43675	47875	45468	325	269	264	374	276	467	282	323	517	324	425	576	360	368	461	421	516	456
9206	9.107	433.112	naringenin-7-O-glucoside	[M-H]-	TRUE	433.114	C21H22O10	TRUE	TRUE	TRUE	60.1	73.4	76.5	433.11209:731 434.11544:0 435.1188:282	263.11841:19 271.05765:93	459	522	646	522	731	380	310	134	247	172	572	65	247	157	97	201	141	200	181	309	169	280	176
13817	8.196	579.133	Flavone base + 4O, C-Pen, C-Hex	[M-H]-	TRUE	579.135	C26H28O15	TRUE	TRUE	TRUE	88.2	86.8	78.8	579.13281:86162 580.13616:30586 581.13952:7657	131.04897:9 177.05168:19 298.04489:56 299.05453:19 311.0618:19 312.06332:37 313.06894:37 327.05188:84 339.05203:93 339.07544:28 341.06137:56 351.04358:28 353.06686:46 357.05084:19 357.05884:37 367.05176:28 367.90405:19 368.09628:20 369.06094:1536 371.07831:19 379.06537:19 381.06302:111 381.08231:37 383.07422:19 386.68771:9 395.10101:28 397.82986:37 399.06384:837 399.06949:1684 400.78281:19 405.06…	82642	84486	86137	78256	86162	1393	251	392	119	243	975	355	1255	260	328	483	349	313	240	346	595	123	221
34879	25.294	630.277	5-(2-((10R,13S)-3-hydroxy-10,13-dimethyl-2,3,4,7,8,9,10,11,12,13,14,15,16,17-tetradecahydro-1H-cyclopenta[a]phenanthren-17-yl)-2-oxoethyl)-4-methoxy-6,6-dimethyl-5,6,7,8-tetrahydro-[1,3]dioxolo[4,5-g]isoquinolin-6-ium bromide	[M+H]+	TRUE	630.28	C34H48BrNO5	TRUE	TRUE	TRUE	75.7	63.1	72.8	630.27722:563 631.28057:64 632.28393:0	337.25632:9 612.47925:19 630.27911:102 630.31104:28 630.4953:28	531	563	518	436	677	20	22	16	8	20	13	10	75	11	8	8	14	17	25	27	13	12	7
25110	16.965	475.208	2'-O-Methylkurarinone	[M+Na]+	TRUE	475.21	C27H32O6	TRUE	TRUE	TRUE	81.7	82.6	70.1	475.20786:1369 476.21121:1251 477.21457:270	325.14197:25 351.07648:12 475.21167:43	91	85	101	107	94	119	185	292	1369	169	195	110	145	84	121	135	133	134	150	145	193	133	153
6174	1.001	203.149	N,N-dimethylarginine	[M+H]+	TRUE	203.15	C8H18N4O2	TRUE	TRUE	TRUE	85.3	84.6	85.9	203.14932:5386 204.15267:1153 205.15603:4523	70.06384:76 70.06856:361 71.0622:204 71.07053:37 88.08808:93 113.02716:19 116.07124:111 143.02055:56 145.01433:19 158.12825:111 185.04553:19 203.14653:74	1273	1449	1125	1102	1342	5020	3457	4768	5140	5137	5386	3696	3392	3087	3725	3483	3914	2078	2979	2768	2791	3464	2662
4655	12.972	299.052	2-(3,4-Dihydroxyphenyl)-5-hydroxy-7-methoxy-4H-chromen-4-one	[M-H]-	TRUE	299.054	C16H12O6	TRUE	TRUE	TRUE	85.1	78.9	65.6	299.05685:1551 300.0602:95 301.06356:95	239.92572:6 284.03394:235 285.03384:19 287.21835:6 299.05618:49 299.08548:12	917	1551	1166	742	821	1480	1395	1236	783	657	630	661	910	756	442	340	502	1311	2112	1333	1475	782	944
5062	12.908	313.236	FA 18:1+2O	[M-H]-	TRUE	313.237	C18H34O4	TRUE	TRUE	TRUE	87.1	66.9	79.9	313.23593:17479 314.23928:3566 315.24264:356	55.05231:1 57.04406:3 59.03107:3 69.03824:3 71.05225:6 83.05094:3 84.01974:3 91.01651:3 91.0219:10 97.06413:3 99.08108:10 111.08361:3 113.09943:37 113.11144:13 123.0462:3 123.08065:6 125.09785:37 127.11076:47 129.09323:3 135.11462:3 137.10709:4 139.11079:14 141.12569:33 143.10777:9 150.10381:3 151.11365:21 153.12952:7 153.14699:7 154.11443:3 155.10423:3 155.14467:19 157.11992:3 158.03592:3 163.11…	17753	17729	15928	21859	18446	21765	16782	17479	17875	19579	17894	16759	17616	15553	17188	17490	18701	16091	17193	17607	16733	15898	18191
4661	3.428	299.076	Benzoic acid + 1O, O-Hex	[M-H]-	TRUE	299.078	C13H16O8	TRUE	TRUE	TRUE	89.5	82	77.3	299.07623:2950 300.07958:345 301.08294:69	85.02938:5 89.03055:3 93.03248:87 136.59581:13 137.02173:515 138.02972:11	2950	2601	1973	2887	2765	102	173	189	168	82	127	277	223	148	141	317	381	242	202	180	211	252	140
41770	8.964	765.256	Eleutheroside E	[M+Na]+	TRUE	765.26	C34H46O18	TRUE	TRUE	TRUE	85.4	74.2	75	765.25647:934 766.25982:301 767.26318:450	177.05806:9 765.26263:186	96	227	254	252	300	243	193	292	329	451	455	290	414	436	519	516	751	431	468	674	534	860	934
6328	6.883	349.114	(1S,4aR,5S,6R,7R,7aS)-1-[(2S,3R,4S,5S,6R)-3,4,5-trihydroxy-6-(hydroxymethyl)oxan-2-yl]oxy-1,4a,5,6,7,7a-hexahydrocyclopenta[c]pyran-5,6,7-triol	[M-H]-	TRUE	349.112	C14H22O10	TRUE	TRUE	TRUE	86.2	85.5	78.8	349.11801:607 350.12136:0 351.12472:910	99.04584:19 113.02262:7 249.05913:7 267.07513:7 349.11453:19	515	778	607	747	809	349	446	384	511	223	249	607	414	303	360	371	398	410	419	442	580	431	441
22182	16.921	432.236	7b,9-Dihydroxy-3-(hydroxymethyl)-1,1,6,8-tetramethyl-5-oxo-1,1a,1b,4,4a,5,7a,7b,8,9-decahydro-9ah-cyclopropa[3,4]benzo[1,2-e]azulen-9a-yl acetate	[M+ACN+H]+	TRUE	432.238	C22H30O6	TRUE	TRUE	TRUE	82	81.9	74.1	432.23599:36917 433.23934:11481 434.2427:2149	69.0362:74 69.05849:28 78.0526:9 83.37035:9 85.11283:9 87.04578:28 91.05487:37 107.08483:84 109.06582:9 111.04563:65 111.0605:28 115.05867:28 117.06747:28 118.73346:28 118.90579:29 119.08749:2039 119.35874:19 127.04266:19 129.05521:111 133.06586:46 134.65649:19 135.08107:918 147.06729:111 151.07758:19 173.1006:19 181.1004:19 281.14066:111 415.21158:93	28376	21903	20382	20916	18384	10794	13801	16186	36917	11915	15854	10841	12117	12395	12103	12595	11080	8606	9716	12034	13403	14287	14778
28388	1.006	527.156	maltotriose	[M+Na]+	TRUE	527.158	C18H32O16	TRUE	TRUE	TRUE	91	91.3	83.4	527.15668:29609 528.16003:11658 529.16339:3795	183.04749:19 185.04091:93 203.05304:111 245.05884:56 266.07407:19 275.06857:37 324.09296:19 346.22571:38 347.09299:529 357.09128:19 364.43723:40 365.1058:1367 426.11578:19 467.15234:19 526.60559:40 527.15961:3342 527.40918:37	18338	19869	23041	26716	24542	25026	24549	31242	33566	32099	37110	28948	22474	22525	29609	26605	31788	18011	20475	20162	20471	29689	22649
36195	9.312	655.184	6-hydroxy-3-[3-hydroxy-4-[3,4,5-trihydroxy-6-[[3,4,5-trihydroxy-6-(hydroxymethyl)oxan-2-yl]oxymethyl]oxan-2-yl]oxyphenyl]-5,7-dimethoxychromen-4-one	[M+H]+	TRUE	655.187	C29H34O17	TRUE	TRUE	TRUE	82.9	80.9	79	655.18341:3314 656.18676:952 657.19012:287	211.08974:19 330.31998:38 331.07977:566	3314	4491	4295	4969	4677	112	109	93	122	99	132	101	84	98	87	108	96	92	125	117	100	126	129
15585	24.773	346.308	Macamide B	[M+H]+	TRUE	346.31	C23H39NO	TRUE	TRUE	TRUE	84.1	76.5	80.8	346.3089:6028 347.31225:1666 348.31561:150	83.09137:19 91.05538:227 346.14758:38 346.3078:412	4914	5432	4576	5976	5555	7107	7510	7561	9467	10573	7092	4635	5509	5375	6028	7321	9407	5336	6515	7116	8250	7865	4337
2681	10.372	213.148	FA 12:1+1O	[M-H]-	TRUE	213.149	C12H22O3	TRUE	TRUE	TRUE	86.5	74.3	77.5	213.14981:1696 214.15316:505 215.15652:0	177.9045:19 183.14207:74 195.13446:56 213.15038:74	1696	1680	1395	2196	2224	176	72	137	127	101	34	98	130	114	112	126	30	104	86	105	79	58	62
3979	24.393	279.232	9Z,12Z-Linoleic acid	[M-H]-	TRUE	279.233	C18H32O2	TRUE	TRUE	TRUE	63.9	88	76.9	279.2316:2812 280.23495:0 281.23831:6864	279.23547:278	2812	4290	2622	3384	3145	4064	2934	2389	3008	2361	4296	2841	3256	2497	2818	2874	3375	2757	2456	2288	3238	2678	2717
5019	7.28	177.054	3-Methyl-4,8-dihydroxy-3,4-dihydroisocoumarin	[M+H-H2O]+	TRUE	177.054	C10H10O4	TRUE	TRUE	TRUE	78.5	78.9	61.1	177.05257:946 178.05592:140 179.05928:99	117.0383:37 133.01219:19 145.02737:74	440	525	451	587	610	966	1035	1001	1086	1027	1084	891	1029	1003	1026	958	946	1657	1761	2068	1803	1996	1744
13075	16.165	317.209	7-Hydroxy-1,4a-dimethyl-9-oxo-7-propan-2-yl-2,3,4,4b,5,6,10,10a-octahydrophenanthrene-1-carboxylic acid	[M-H2O+H]+	TRUE	317.211	C20H30O4	TRUE	TRUE	TRUE	73.9	68.8	61	317.20728:3461 318.21063:704 319.21399:1956	69.07836:5 74.04736:9 85.06323:9 91.05338:5 94.04752:5 101.07741:5 105.07115:14 107.09047:9 115.04784:9 115.06146:5 117.06875:14 118.04362:5 121.10278:9 121.41053:5 128.06104:14 129.07094:9 130.07515:5 131.08649:33 131.10588:9 133.10136:19 139.11165:5 141.06296:9 143.08527:23 145.09818:28 147.11829:23 148.96623:9 151.07199:9 153.07025:9 155.08163:9 157.09554:9 159.1153:14 161.12648:9 163.51648:5 …	1345	1270	1282	1439	1432	3060	3250	3164	3589	3518	3517	3343	4538	3015	3720	3361	3657	3461	3577	3829	4026	4132	3732
37573	24.464	681.407	Fucoxanthin	[M+Na]+	TRUE	681.41	C42H58O6	TRUE	TRUE	TRUE	81.4	64.8	75	681.40417:1205 682.40752:456 683.41088:453	681.40399:93 681.41504:262 681.56244:56	223	269	254	233	228	273	287	324	301	370	299	164	242	290	264	240	316	1180	1205	1272	1112	1697	1637
23329	8.885	449.106	Homoorientin	[M+H]+	TRUE	449.108	C21H20O11	TRUE	TRUE	TRUE	91	86	93.1	449.10403:13077 450.10738:2783 451.11074:879	109.03605:9 149.02077:9 286.04791:19 287.05142:65 296.07004:9 298.85745:19 299.0527:841 299.33347:19 300.05676:19 311.04578:19 311.05322:56 313.03549:28 325.0332:19 325.06882:111 325.94232:9 328.07108:28 328.38562:19 329.06125:666 339.0813:111 341.01782:28 349.06436:19 351.05032:19 353.06314:407 353.59378:19 365.04504:19 365.05853:84 367.0921:28 369.05814:19 377.04599:19 377.06516:139 383.06949:1…	13077	16245	16569	20558	21164	149	130	120	187	168	184	128	163	179	158	122	205	141	163	160	208	154	117
23673	23.108	453.298	ruscogenin	[M+Na]+	TRUE	453.3	C27H42O4	TRUE	TRUE	TRUE	90.1	87.9	75	453.29779:864 454.30114:393 455.3045:916	453.35376:167 453.38382:93	407	348	591	457	426	666	663	765	902	864	656	496	454	612	611	555	786	521	585	689	711	522	633
15325	1.022	343.122	Maltose	[M+H]+	TRUE	343.123	C12H22O11	TRUE	TRUE	TRUE	85	79.2	81.7	343.12363:15741 344.12698:4006 345.13034:600	57.03899:37 61.04492:19 69.03587:37 85.02651:56 85.02911:167 91.03964:19 97.02725:74 100.78076:19 109.02997:56 116.09309:19 127.03735:223 136.07155:19 145.05032:223 146.28374:19 163.05811:93	18943	20015	25066	25575	23409	17936	17606	19621	17262	15439	17718	18380	17318	14399	19425	17975	15498	17189	15741	20413	17122	19553	17538
16846	7.486	361.108	2-[4-(4-tert-butylphenoxy)-1H-pyrazol-5-yl]-5-methoxyphenol	[M+Na]+	TRUE	361.11	C19H18N2O4	TRUE	TRUE	TRUE	81.5	61.8	75	361.10822:672 362.11157:278 363.11493:297	132.11487:6 186.00974:6 323.23798:6 361.10999:50	191	223	296	427	401	364	352	414	502	431	581	421	508	480	534	672	687	420	357	559	581	561	512
2703	0.991	116.071	Proline	[M+H]+	TRUE	116.071	C5H9NO2	TRUE	TRUE	TRUE	90.9	82.1	85.9	116.0707:3880 117.07405:601 118.07741:2043	67.02451:19 68.06509:19 70.06866:723 116.06956:37	3068	4799	4858	4663	5187	3346	3278	3767	3739	3880	4578	3474	3374	3547	3927	4191	4045	2238	3256	2466	3086	2724	3163
26266	9.958	493.132	Tricin 5-glucoside	[M+H]+	TRUE	493.134	C23H24O12	TRUE	TRUE	TRUE	84.8	70.2	85.2	493.13083:316353 494.13418:125832 495.13754:31265	53.05465:19 55.02607:37 57.7263:19 61.04025:19 69.03548:74 71.05909:19 81.04912:56 85.02718:301 91.0416:37 97.0292:56 97.55965:19 108.02901:19 112.15346:19 127.03757:186 145.04863:186 178.02567:37 198.96248:19 203.02873:56 207.9373:19 229.05209:37 241.04195:93 242.05325:93 250.27805:19 258.05261:130 263.43842:19 270.04532:407 270.05228:581 271.88785:19 273.0365:74 285.0372:74 286.04373:186 286.06…	316353	439627	418236	432071	428323	1062	1207	1216	1251	994	1449	680	841	911	961	1167	1167	1363	1624	1530	1775	1579	1669
22536	13.28	437.122	Podophyllotoxin	[M+Na]+	TRUE	437.12	C22H22O8	TRUE	TRUE	TRUE	78	69.8	72.9	437.12219:2764 438.12554:806 439.1289:268	221.0782:19 437.12695:130	442	466	317	303	377	572	486	601	577	551	2764	381	603	597	444	507	1004	2146	439	695	314	1222	1064
4943	15.31	309.205	(9Z,11E,13S,15Z)-13-hydroperoxyoctadeca-9,11,15-trienoic acid	[M-H]-	TRUE	309.207	C18H30O4	TRUE	TRUE	TRUE	86.6	65	93	309.20493:5465 310.20828:660 311.21164:1650	58.00953:6 151.12259:12 155.10445:12 159.03662:6 165.12602:37 168.11935:6 171.10634:25 179.15802:19 181.12245:19 184.0193:6 195.09848:6 209.02415:19 210.02933:25 216.923:6 223.04182:12 234.01659:6 244.83733:6 247.20166:19 247.23051:12 249.18732:6 265.21588:25 281.21121:6 291.19168:99 309.15067:130 309.18542:56 309.20529:37	3273	4200	3104	4164	3592	5465	4133	4416	4312	3282	4458	3807	3869	3428	4392	3922	4100	3612	3936	4219	3783	3574	3956
11294	21.012	295.131	Tanshinone Iia	[M+H]+	TRUE	295.133	C19H18O3	TRUE	TRUE	TRUE	90	84	89.3	295.13309:2987 296.13644:676 297.1398:1014	176.05815:3 178.07544:12 179.0865:9 191.07941:9 193.1062:12 196.08539:9 206.07063:9 206.10913:19 207.07893:22 215.0766:3 220.08611:9 221.09451:15 221.13019:12 225.12152:9 231.11214:9 234.1024:34 235.06879:25 248.082:9 249.12581:152 251.06119:9 252.07762:56 253.08264:12 257.05481:3 262.09665:43 265.08505:9 266.09262:40 277.12341:115 278.12299:9 280.11096:28 295.12903:74 295.2236:9	802	774	792	855	852	2388	3088	2706	2946	2867	2964	1088	1212	1190	1199	1236	1319	2320	2392	3018	2843	5580	2987
21783	16.334	427.137	6-Hydroxysumatrol	[M+H]+	TRUE	427.139	C23H22O8	TRUE	TRUE	TRUE	85.4	90.6	76.5	427.13571:968 428.13906:414 429.14242:299	117.03197:9 145.03224:37 177.05118:93 427.13681:28 427.16016:19	331	323	281	331	298	642	830	721	984	938	1014	886	951	943	1253	1440	968	530	627	525	789	797	680
13042	9.155	317.062	Eupafolin	[M+H]+	TRUE	317.06	C16H12O7	TRUE	TRUE	TRUE	90	79.1	87.2	317.06168:1260 318.06503:255 319.06839:364	280.00662:19 302.03543:74 317.06146:93	837	998	1260	1229	1176	108	112	94	98	101	82	85	106	101	99	82	49	76	115	117	83	62	61
2140	12.471	177.055	4-Methoxycinnamic acid	[M-H]-	TRUE	177.056	C10H10O3	TRUE	TRUE	TRUE	88.4	67.2	87.8	177.05066:621 178.05401:351 179.05737:117	117.02761:19 117.03677:111 145.02496:37 146.23599:9 177.05165:37	418	362	323	212	639	694	606	569	595	510	621	443	358	639	620	195	410	638	499	503	357	313	458
12360	15.582	309.132	Toddalolactone	[M+H]+	TRUE	309.13	C16H20O6	TRUE	TRUE	TRUE	85.1	72.1	75	309.12921:590 310.13256:192 311.13592:312	135.08061:7 309.12524:7 309.1575:7	365	397	373	588	574	595	560	508	561	554	686	461	475	611	535	595	695	484	462	590	525	597	636
1583	10.435	144.045	4-Hydroxyquinoline	[M-H]-	TRUE	144.045	C9H7NO	TRUE	TRUE	TRUE	94.9	88	88	144.04442:708 145.04777:0 146.05113:0	116.06478:19 144.03922:74 144.06293:37	501	547	169	427	295	164	1238	1025	1133	1022	1071	725	398	455	708	550	518	693	97	594	904	1305	988
6386	7.136	351.13	3-O-(2-O-acetyl-3,6-dideoxy-alpha-D-xylo-hexopyranosyl)-alpha-D-mannopyranose	[M-H]-	TRUE	351.129	C14H24O10	TRUE	TRUE	TRUE	86.8	69.6	81.6	351.12695:12298 352.1303:1635 353.13366:455	59.01766:43 59.02525:25 71.01228:12 71.02775:25 75.01099:43 85.02949:68 87.00607:19 93.03802:6 99.00792:37 101.06184:285 103.00501:31 113.02545:124 115.00874:19 115.22984:6 117.0215:25 129.01863:19 175.02199:31 231.04555:31 249.06139:179 267.07495:19 291.10083:12 351.1257:241	13224	12298	12472	12198	11975	11674	12083	8920	10884	10868	11223	13336	13419	11951	12061	11493	14649	8399	8496	8047	8351	9011	9039
9592	9.703	447.096	Luteolin-4'-O-glucoside	[M-H]-	TRUE	447.093	C21H20O11	TRUE	TRUE	TRUE	88.4	81.2	85.8	447.0957:2726 448.09905:549 449.10241:183	167.04109:19 284.03293:56 285.04474:413 285.06619:75 299.08682:19 327.04437:37 445.69394:19 447.09549:278 447.13129:56	2690	2726	2622	2572	3660	56	108	74	153	130	194	104	53	140	0	59	83	77	69	47	81	44	113
44420	12.009	823.476	Ginsenoside Rg1	[M+Na]+	TRUE	823.48	C42H72O14	TRUE	TRUE	TRUE	84.7	72.3	75	823.47552:1229 824.47887:566 825.48223:235	820.85413:19 823.48083:506	162	245	233	293	328	616	504	549	504	680	893	486	410	475	566	617	525	1055	658	1149	1015	1229	1180
29010	18.151	537.303	(9Z,12Z,15Z)-(S)-2-Hydroxy-3-(((2R,3R,4S,5R,6R)-3,4,5-trihydroxy-6-(hydroxymethyl)tetrahydro-2H-pyran-2-yl)oxy)propyl octadeca-9,12,15-trienoate	[M+Na]+	TRUE	537.3	C27H46O9	TRUE	TRUE	TRUE	83.1	83.3	78.3	537.29608:4427 538.29943:1439 539.30279:532	147.06876:19 281.04364:19 536.12653:19 537.30707:608	4427	4091	5009	5842	6550	317	398	503	471	481	568	287	426	377	454	513	525	446	465	588	731	837	624
3194	2.009	130.051	L-5-Oxoproline	[M+H]+	TRUE	130.05	C5H7NO3	TRUE	TRUE	TRUE	87.4	70.4	87.7	130.05058:4952 131.05393:504 132.05729:279	56.05157:68 68.99813:15 70.0019:15 70.94275:9 71.94135:12 72.93729:15 81.94666:3 84.04528:372 103.05796:12 130.06395:65	2179	2350	2816	2896	2783	2619	2575	2698	3487	3152	3227	4171	4623	4014	4053	4952	4761	2446	3127	3423	2949	3120	3173
23845	14.407	861.242	Smiglaside C (Not validated) + 1Acetyl	[M-H]-	TRUE	861.247	C40H46O21	TRUE	TRUE	TRUE	90.5	81.7	83.4	861.24493:16033 862.24828:6052 863.25164:2593	132.01845:28 143.98697:9 160.01685:56 161.02184:19 175.03711:167 175.05952:46 193.05383:46 361.08743:19 379.11038:19 555.14874:19 583.1759:37 601.18695:19 607.6933:9 625.18652:28 643.18573:46 667.19177:37 681.19122:9 685.21619:37 755.36902:9 775.87207:9 777.24475:19 801.18958:19 801.22559:121 819.24829:186 819.28461:93 846.22699:19 858.45709:19 858.52325:46 861.03955:23 861.25079:3171 861.54492:54	10206	7409	8265	8239	7716	14002	14515	13490	12438	11884	14637	20742	20359	17061	18725	20327	14200	11644	12282	10393	16033	14553	11298
6258	7.295	205.096	Tryptophan	[M+H]+	TRUE	205.097	C11H12N2O2	TRUE	TRUE	TRUE	92.8	89.5	93.6	205.09557:9859 206.09892:1732 207.10228:264	65.04439:14 91.05441:51 115.05507:195 116.06412:14 117.05466:121 117.07146:88 117.70155:24 118.06476:1026 121.02943:51 127.05476:70 128.05112:19 130.06516:121 132.08356:172 142.06525:153 143.0731:237 144.08115:279 146.05836:960 149.02275:153 159.09003:116 160.07253:19 170.06015:135 188.07019:163 190.21332:5	5494	6624	6873	7002	7121	8284	9372	9575	10004	9794	10956	8978	8988	9859	9459	10496	10918	7188	7709	9011	9137	9350	9410
6216	24.395	345.278	3-[(Z)-heptadec-10-enyl]benzene-1,2-diol	[M-H]-	TRUE	345.28	C23H38O2	TRUE	TRUE	TRUE	64.4	84.9	72.9	345.28177:33425 346.28512:9889 347.28848:1830	79.06657:19 81.04163:56 122.03751:74 126.17112:19 135.06284:19 149.0654:56 191.13383:19 283.13696:19 301.30048:94 303.271:785 327.24225:19 344.19025:93 345.15717:66 345.28305:13618 345.4798:363 345.60571:399 345.74219:93	3908	4004	4337	3575	3146	41312	41040	34885	33425	38705	38715	3785	5037	3071	4691	3674	3623	160	229	130	165	164	140
36741	12.463	665.314	Rubusoside	[M+Na]+	TRUE	665.31	C32H50O13	TRUE	TRUE	TRUE	72.2	60.5	61.7	665.31372:564 666.31707:277 667.32043:132	347.10651:8 665.31299:103 665.36755:11	92	60	117	113	128	227	221	259	264	238	281	327	299	343	306	363	387	301	347	413	403	564	415
14197	13.125	331.079	4',5,7-trihydroxy-3,6-dimethoxyflavone	[M+H]+	TRUE	331.081	C17H14O7	TRUE	TRUE	TRUE	84.4	77.5	77.3	331.07935:35415 332.0827:7041 333.08606:910	95.08437:9 118.09475:9 136.01961:19 153.01833:74 155.05046:19 176.04724:9 178.02487:65 179.04709:19 203.03613:37 213.05223:19 225.05305:19 229.05162:37 241.04814:19 242.05508:84 245.03989:19 252.04271:9 254.86514:19 257.04434:19 258.05237:93 267.12811:9 270.0498:752 271.05975:28 273.03867:93 285.04193:74 286.0437:300 287.05203:234 288.06213:19 298.03885:37 299.05099:56 301.02896:46 313.03885:84 3…	25747	27957	30611	35415	33841	2771	2987	3189	3393	3488	3206	1222	1099	1065	1142	1143	1209	2941	3309	3329	4563	3990	3094
4129	9.364	153.054	Vanillin	[M+H]+	TRUE	153.055	C8H8O3	TRUE	TRUE	TRUE	91.6	79.6	92.9	153.0544:3802 154.05775:386 155.06111:316	65.03688:38 65.04143:217 65.06306:19 93.03756:121 105.06714:9 110.03364:28 125.05869:19 136.03769:9	1228	1664	1822	1846	1745	5331	5523	5779	6333	6131	6591	3553	3552	3838	3802	3860	4404	4154	4855	4711	5445	5411	5324
18708	23.503	721.506	[3-[2,3-dihydroxypropoxy(hydroxy)phosphoryl]oxy-2-hexadecanoyloxypropyl] hexadecanoate	[M-H]-	TRUE	721.502	C38H75O10P	TRUE	TRUE	TRUE	61.6	86.7	65.1	721.49811:36094 722.50146:14570 723.50482:4608	151.21394:19 152.99643:130 153.7043:19 254.41876:39 255.22987:1425 256.23428:74 391.22226:186 461.09464:19 465.25613:93 481.72342:19 483.27045:186 485.27072:56 658.45477:19 719.22137:56 721.50568:7879 721.78625:388 721.97583:74	711	49828	46965	41756	36094	36308	9443	6780	5852	5266	29695	6443	33713	6773	9008	7818	6479	6695	6510	5800	26024	5124	5467
38797	20.426	705.396	Voacamine	[M+H]+	TRUE	705.4	C43H52N4O5	TRUE	TRUE	TRUE	83.9	69.1	75	705.40271:1084 706.40606:357 707.40942:269	562.87524:19 705.40234:176	346	325	322	280	361	564	926	1086	1229	1321	1471	765	1027	1063	1189	1349	1546	956	1084	1594	1552	1737	1630
14807	8.455	609.15	Luteolin 6-C-glucoside 8-C-arabinoside	[M-H]-	TRUE	609.146	C27H30O16	TRUE	TRUE	TRUE	86.8	71.9	75.5	609.14606:47380 610.14941:22094 611.15277:5081	86.85349:9 110.67919:19 113.02419:19 168.37984:9 285.03473:56 297.03955:46 298.04749:176 309.03888:302 311.04691:19 325.02573:28 326.03925:46 327.04926:148 327.07986:37 338.03647:56 339.04407:167 351.04858:46 353.06125:19 357.05316:262 369.06049:102 371.08057:56 379.03735:19 381.05145:37 383.10956:9 387.07578:28 395.17612:9 399.07162:46 411.07306:74 428.06281:28 428.91299:20 429.08548:1281 431.10…	47380	45347	45229	45042	49438	500	129	142	182	108	443	246	425	155	317	112	211	138	82	177	354	83	128
20506	8.378	409.182	2-(5-methoxy-4,8,8-trimethyl-2-oxo-2,8,9,10-tetrahydropyrano[2,3-f]chromen-3-yl)-N-(pyridin-2-yl)acetamide	[M+H]+	TRUE	409.18	C23H24N2O5	TRUE	TRUE	TRUE	86.7	85.8	80.2	409.18243:2242 410.18578:649 411.18914:396	171.94595:9 409.10092:19 409.12662:28 409.18372:272	2334	2866	2672	2026	2242	208	253	234	323	265	274	242	237	305	232	279	220	193	222	287	298	253	239
24328	10.52	463.12	Peonidin-3-O-beta-D-glucoside	[M]+	TRUE	463.123	C22H23O11	TRUE	TRUE	TRUE	77.3	63	75.4	463.11755:7845 464.1209:2050 465.12426:456	258.05505:19 281.04318:38 286.04633:75 300.28998:39 301.0683:838 301.09525:214 313.06888:19 322.0636:19 331.065:56 331.08041:261 445.24615:19	7845	9870	9530	9188	11473	346	352	510	410	532	262	287	491	271	418	403	322	268	457	401	657	358	500
4741	20.993	301.216	(1R,7R)-7-ethenyl-1,4a,7-trimethyl-3,4,4b,5,6,9,10,10a-octahydro-2H-phenanthrene-1-carboxylic acid	[M-H]-	TRUE	301.217	C20H30O2	TRUE	TRUE	TRUE	64.7	92	75.2	301.21661:11815 302.21996:2832 303.22332:2478	79.96828:19 226.07387:9 241.2128:84 243.0929:19 300.26453:28 301.12604:21 301.21667:3125 301.39551:28	657	1886	436	1847	1576	18129	18737	9873	12689	15637	17901	7078	13398	17045	22095	19685	23663	11367	11417	8047	8610	11815	11582
4569	9.327	165.054	p-Coumaric acid	[M+H]+	TRUE	165.055	C9H8O3	TRUE	TRUE	TRUE	89.9	84.3	86.7	165.05472:3880 166.05807:581 167.06143:602	56.94918:19 65.03954:56 77.04008:37 79.95636:19 91.05135:132 91.05405:304 95.05151:37 119.04797:450 123.05146:19 147.03871:56 147.04384:297	1266	1306	1181	1593	1471	3594	3880	4150	4303	4288	4994	2032	2319	2656	2495	2278	2918	3066	3313	3208	3829	3492	3590
4725	12.685	301.07	Hesperetin	[M-H]-	TRUE	301.072	C16H14O6	TRUE	TRUE	TRUE	83.4	72.2	67.9	301.06778:1196 302.07113:400 303.07449:100	63.02618:4 65.00801:4 81.66711:1 107.01208:6 108.0219:7 108.03951:3 121.94393:1 123.04053:4 125.02582:3 134.03613:31 135.04132:4 136.02228:9 149.06157:30 149.07707:6 151.00475:66 152.00194:4 152.02805:3 164.01085:26 165.02464:4 174.03603:4 177.01479:9 188.04482:3 199.03763:4 201.01184:4 241.0495:3 242.05417:3 257.08075:6 258.05023:3 268.06497:3 285.03528:3 286.04892:6 301.06995:33 301.09689:9	424	523	405	621	544	1704	1196	730	878	1089	887	669	811	462	425	618	555	1277	1543	958	706	958	744
32910	19.661	599.114	Procyanidin A1	[M+Na]+	TRUE	599.11	C30H24O12	TRUE	TRUE	TRUE	76.1	65	65.7	599.11182:4946 600.11517:1862 601.11853:397	263.23462:19 598.49634:13 599.11462:344 599.40143:19 599.50507:99	3977	4018	3164	2822	2646	2267	1879	1827	1416	2326	4941	2657	2802	2342	2507	2368	5227	2427	2066	2140	2060	2990	4946
13273	17.394	319.224	(E)-5-(1,2,4a,5-tetramethyl-7-oxo-3,4,8,8a-tetrahydro-2H-naphthalen-1-yl)-3-methylpent-2-enoic acid	[M+H]+	TRUE	319.226	C20H30O3	TRUE	TRUE	TRUE	73.4	60.4	64.3	319.22647:5657 320.22982:1272 321.23318:545	55.0564:8 83.05167:5 93.07079:5 95.08883:13 105.06917:8 107.08701:8 109.10045:13 111.0776:5 111.1133:3 119.08515:21 121.10068:24 123.07987:8 123.11745:11 123.98352:3 129.07201:8 131.08434:13 133.0992:29 135.0802:21 135.11465:13 136.08278:8 137.09569:16 141.07248:8 143.08473:16 145.10103:19 147.08008:48 147.11774:16 149.09492:96 151.11134:8 153.08891:5 155.08461:5 157.09676:13 159.11655:21 160.091…	1271	1321	1329	1380	1253	1320	1411	1505	1557	1519	1698	5649	5657	5849	5649	6072	6122	1708	1790	1766	1961	2270	2357
14748	8.445	607.171	Diosmetin-7-O-neohesperidoside	[M-H]-	TRUE	607.167	C28H32O15	TRUE	TRUE	TRUE	81.1	60.3	74.1	607.17053:942 608.17388:453 609.17724:45146	279.03232:6 307.01654:31 331.1731:6 397.02875:6 607.12738:105	843	557	703	942	812	129	109	56	111	121	94	32	193	78	55	122	61	123	58	55	64	105	239
11902	13.103	303.084	5,7-dihydroxy-2-(3-hydroxy-4-methoxyphenyl)-2,3-dihydrochromen-4-one	[M+H]+	TRUE	303.086	C16H14O6	TRUE	TRUE	TRUE	89.5	79.2	85.9	303.0838:763 304.08715:186 305.09051:176	137.05968:19 145.02318:19 145.02658:37 153.01767:37 177.05377:46 179.03514:19 303.10165:19	244	215	242	352	254	646	659	776	829	772	866	599	717	554	597	678	529	688	713	763	1099	1048	807
17409	10.278	687.191	(2S,3R)-2-[4-(5,7-dihydroxy-4-oxo-4H-1-benzopyran-2-yl)-2,6-dimethoxyphenoxy]-3-hydroxy-3-(4-hydroxy-3-methoxyphenyl)propyl beta-D-glucopyranoside	[M-H]-	TRUE	687.195	C33H36O16	TRUE	TRUE	TRUE	83	68.2	71.6	687.18909:19977 688.19244:6767 689.1958:2828	150.02817:74 165.05531:186 165.07707:46 195.06668:204 195.08836:37 314.03732:37 328.05936:38 329.06735:339 331.06741:28 341.06485:9 371.08701:19 461.06363:19 476.08868:74 476.11023:46 490.10709:65 491.12314:779 505.14386:9 509.54688:9 525.13867:74 669.18225:19 669.19684:9 685.00354:37 686.90729:19 687.0072:21 687.19214:4125 687.466:98 687.651:37	17645	19977	16225	20331	17767	57	127	41	51	229	56	120	168	169	187	73	305	47	86	58	102	66	54
14618	18.128	335.218	lapidin	[M+H]+	TRUE	335.22	C20H30O4	TRUE	TRUE	TRUE	80.7	60.2	75	335.21735:2728 336.2207:662 337.22406:1966	113.09545:9 335.14352:19 335.21848:111	996	837	991	1192	1257	1279	1240	1439	1729	1810	2211	998	1064	1169	1200	1160	1336	1957	2243	2426	2728	2710	2859
15309	0.88	343.092	Corylin	[M+Na]+	TRUE	343.09	C20H16O4	TRUE	TRUE	TRUE	80.8	60.6	75	343.08746:6119 344.09081:1097 345.09417:811	241.065:19 343.10165:56	2100	2839	2413	2957	2832	6119	5779	6391	6938	6957	6844	5168	5086	5159	5913	5968	5066	5826	5977	6735	6347	6864	7296
29011	18.462	537.303	3-[(3S,5S,8R,9S,10R,13R,14S,17R)-5,14-dihydroxy-10,13-dimethyl-3-[(2R,3R,4R,5R,6R)-3,4,5-trihydroxy-6-methyloxan-2-yl]oxy-2,3,4,6,7,8,9,11,12,15,16,17-dodecahydro-1H-cyclopenta[a]phenanthren-17-yl]-2H-furan-5-one	[M+H]+	TRUE	537.3	C29H44O9	TRUE	TRUE	TRUE	84.8	94.5	68.5	537.30096:12726 538.30431:3553 539.30767:885	281.05472:28 282.05423:46 301.19794:9 341.01633:19 362.78723:9 375.27075:19 535.58838:19 535.6145:38 536.87292:21 537.30798:2384	9784	10336	12962	12726	14650	781	811	849	1073	1187	1003	587	678	884	965	809	1295	1051	1004	1368	936	1058	1456
25388	26.561	925.522	Saikosaponin C	[M-H]-	TRUE	925.517	C48H78O17	TRUE	TRUE	TRUE	86.7	65.9	75	925.52246:545 926.52581:389 927.52917:65	61.99289:14 349.21744:5 865.52863:9 925.48724:14 925.53015:14 925.57312:9	533	347	545	372	354	76	41	88	40	29	103	88	39	20	21	65	83	31	72	35	22	66	88
14244	23.114	331.286	1-Hexadecanoyl-sn-glycerol	[M+H]+	TRUE	331.284	C19H38O4	TRUE	TRUE	TRUE	80.7	64	73.1	331.28177:310508 332.28512:68545 333.28848:12054	51.26502:19 54.91983:38 55.05904:283 55.07056:95 57.03828:149 57.07347:2269 57.31686:37 59.42185:38 65.0563:38 67.05472:446 68.06061:38 69.07163:384 70.8758:60 71.08868:1552 71.23872:37 75.04468:74 79.61834:19 81.07082:1014 81.36977:37 83.0862:594 85.10289:1432 86.01816:37 87.39562:19 89.05956:56 89.06489:37 93.76378:39 95.08602:1697 95.70367:37 97.10206:362 99.08162:56 99.11674:244 99.13221:56 1…	173514	185700	195770	177610	187223	196547	193890	199367	232783	261896	280455	154460	162737	177526	192470	289686	310508	210975	208139	169867	242680	314288	292519
11768	16.968	301.214	(1R,4aR)-6-hydroxy-1,4a-dimethyl-7-propan-2-yl-2,3,4,4b,5,6,10,10a-octahydrophenanthrene-1-carboxylic acid	[M-H2O+H]+	TRUE	301.216	C20H30O3	TRUE	TRUE	TRUE	75.5	67.7	62.5	301.21643:8177 302.21978:1952 303.22314:4796	65.04063:9 67.05731:19 79.0592:9 85.06554:9 93.06844:19 95.08649:19 97.74483:9 107.0862:19 109.1041:37 112.03548:9 117.0706:37 119.08452:37 121.10163:93 121.11095:28 123.11532:28 129.06831:28 131.08228:37 133.0939:19 133.10042:46 135.11427:37 141.07387:19 143.08449:46 145.10081:93 145.11612:37 147.11414:65 149.09306:19 155.08104:19 157.10384:46 159.11658:74 161.13495:19 165.12825:9 171.11475:56 1…	2617	2331	2346	2337	2280	4224	4837	4673	5574	5018	5630	7555	10201	6743	7833	7173	8177	5136	5680	5911	7129	7911	6134
13447	16.34	321.24	5-[(8aS)-2,5,5,8a-tetramethyl-3-oxo-4a,6,7,8-tetrahydro-4H-naphthalen-1-yl]-3-methylpentanoic acid	[M+H]+	TRUE	321.242	C20H32O3	TRUE	TRUE	TRUE	77.7	66.8	63.2	321.24033:15700 322.24368:3713 323.24704:795	55.06361:9 69.07202:28 81.07247:19 85.63277:9 93.07109:19 99.09464:9 105.06961:37 107.08601:46 109.06704:19 109.10094:19 111.08109:37 117.06575:19 119.08577:37 121.10287:93 123.115:111 127.98457:19 131.08188:19 131.08511:37 133.10162:121 133.12117:19 135.11877:37 137.09158:28 137.09489:84 137.11307:28 139.11032:19 145.1003:46 147.08963:19 147.11874:93 147.12901:37 149.09424:130 149.11491:28 149.1…	1583	1520	1640	1564	1660	1765	2042	1851	2005	1868	1999	13735	15083	14076	14828	15700	14023	2098	2237	2179	2465	2585	2091
49499	25.419	991.484	Digilanide A	[M+Na]+	TRUE	991.49	C49H76O19	TRUE	TRUE	TRUE	81.3	62.8	75	991.48358:540 992.48693:509 993.49029:306	333.16086:19 499.22888:9 991.50201:56	238	535	540	797	1071	156	98	116	126	69	86	184	150	109	168	103	77	139	246	220	172	175	124
5920	9.526	339.126	alpha-guaiaconic acid	[M-H]-	TRUE	339.124	C20H20O5	TRUE	TRUE	TRUE	65.1	86.8	83.3	339.12598:901 340.12933:202 341.13269:302	131.09752:9 263.07208:19 278.96603:9 281.08228:28 309.07532:111 324.10471:56 339.17371:19	504	781	583	716	514	517	710	403	345	493	615	622	901	685	530	824	543	506	432	469	504	323	311
17412	10.799	687.199	Tricin 4'-O-(erythro-beta-guaiacylglyceryl) ether 7-O-beta-D-glucopyranoside	[M-H]-	TRUE	687.194	C33H36O16	TRUE	TRUE	TRUE	84.7	78.4	73	687.18958:14266 688.19293:4305 689.19629:1723	150.0359:56 153.18839:19 165.05267:148 195.06406:167 299.03397:37 314.04001:56 324.11176:19 328.05713:76 329.06512:902 348.0683:19 475.16382:19 477.11948:130 478.15283:38 491.12805:243 523.5733:39 525.14728:2489 525.55164:37 532.58667:19 669.18585:19 687.19226:454	15146	14712	13248	13420	14266	345	185	159	173	168	137	237	175	169	196	140	221	205	220	215	170	119	164
9861	22.621	455.356	Ursolic Acid	[M-H]-	TRUE	455.353	C30H48O3	TRUE	TRUE	TRUE	61.9	88	67.1	455.35602:908 456.35937:0 457.36273:0	455.34381:93	199	170	183	150	194	381	763	614	534	690	507	309	108	155	263	177	192	444	908	233	349	423	464
19650	0.957	397.113	Swertiamarin	[M+Na]+	TRUE	397.11	C16H22O10	TRUE	TRUE	TRUE	86.1	75	75	397.11014:1927 398.11349:693 399.11685:878	397.08334:37	844	999	865	1060	1267	1787	1927	2461	2411	2124	2240	1547	928	1620	1864	1482	1812	2101	2042	2010	1733	2258	2267
17184	7.387	681.127	Flavone base + 3O, 2MeO, O-HexA-HexA	[M-H]-	TRUE	681.132	C29H30O19	TRUE	TRUE	TRUE	88.1	79.7	76.8	681.1272:14820 682.13055:5004 683.13391:1300	72.99301:19 73.67469:19 89.02788:9 99.03309:9 113.02384:65 115.07675:9 129.01852:9 131.07872:9 157.0121:19 157.02802:28 175.02562:102 192.42799:19 193.03148:195 235.04227:28 263.04907:19 289.05991:46 300.01288:19 307.06268:37 308.0181:9 315.04803:121 329.06934:148 333.04721:75 349.94714:39 351.05432:2322 351.49872:12 352.48376:19 357.04822:19 360.99011:19 366.88406:9 371.07547:37 399.06052:9 425.…	14143	13636	14820	13689	14749	88	145	141	170	128	147	148	93	159	151	96	43	102	275	187	187	126	32
2205	12.184	181.049	4-O-Methylphloracetophenone	[M-H]-	TRUE	181.051	C9H10O4	TRUE	TRUE	TRUE	71.6	89.7	95.9	181.04922:1116 182.05257:206 183.05593:1031	95.01543:12 96.96106:19 123.00697:19 124.0203:31 134.33313:6 138.03079:62 138.04573:19 165.02083:19 166.02866:155 166.04684:31 181.05243:19	634	679	304	618	719	1401	1730	1023	1232	1573	1561	730	1139	417	845	468	461	1560	1526	950	1072	1586	1116
16120	14.772	353.172	meso-dihydroguaiaretic acid	[M+Na]+	TRUE	353.17	C20H26O4	TRUE	TRUE	TRUE	86.9	78.7	75	353.17239:1620 354.17574:304 355.1791:529	139.04433:19 198.26727:9 353.17343:84 353.20526:46	553	461	650	592	443	1126	1303	1158	1257	1235	1620	1088	1146	1146	1110	1053	864	938	968	1122	1111	1262	1114
37677	15.117	683.365	(2R)-2-[2-[2-[4-(4-bromophenyl)phenyl]sulfonylhydrazinyl]-2-oxoethyl]-N-[(2S)-3-(1H-indol-3-yl)-1-(methylamino)-1-oxopropan-2-yl]-4-methylpentanamide	[M+H]+	TRUE	683.36	C38H46N6O6	TRUE	TRUE	TRUE	79.8	69.5	78.5	683.36462:2104 684.36797:960 685.37133:389	247.17972:93 313.07025:28 385.28391:9 437.20026:19 559.24078:19 683.25067:37 683.36133:176	84	47	68	46	41	125	193	483	2104	168	157	27	28	27	23	49	18	51	35	40	40	68	36
11765	15.792	301.214	Grandiflorenic acid	[M+H]+	TRUE	301.216	C20H28O2	TRUE	TRUE	TRUE	75.9	60.9	71.1	301.21442:4793 302.21777:1245 303.22113:743	55.06261:4 57.03551:4 67.05863:4 69.08616:1 77.05153:3 79.05553:6 81.03442:3 81.04205:7 81.07127:9 91.05725:6 93.07118:10 95.08649:10 105.07117:13 107.04961:3 107.08321:6 109.06273:4 109.10106:4 111.08121:3 115.05404:10 117.07046:9 118.79649:3 119.0859:46 120.10162:3 121.06418:7 121.10146:33 123.07755:6 123.1167:13 127.05065:3 128.06297:9 129.05687:3 129.06969:10 131.08849:17 131.09981:6 133.0659…	1400	1365	1593	1353	1409	2792	3062	3182	3229	3195	3373	4430	5456	4740	4833	4793	4845	2656	3096	3081	3551	3609	3109
16470	16.572	357.202	Lathyrol	[M+Na]+	TRUE	357.2	C20H30O4	TRUE	TRUE	TRUE	85.7	75	75	357.20248:1587 358.20583:203 359.20919:1279	357.20889:130	313	269	259	247	298	527	447	513	609	543	578	1279	1405	1584	1356	1357	1587	461	518	498	642	568	639
2168	0.911	179.055	Psicose	[M-H]-	TRUE	179.056	C6H12O6	TRUE	TRUE	TRUE	62.1	74.5	80.2	179.05684:10613 180.06019:896 181.06355:2291	57.00237:56 58.01166:56 59.01789:628 59.03524:100 59.05693:45 61.37432:19 71.01491:242 71.05536:37 75.0088:74 78.96263:37 85.04668:19 87.02872:19 89.02693:74 89.04158:56 96.95869:37 101.0295:37 113.02576:19	10694	10613	10109	10446	9215	8305	8029	9930	9924	9820	9803	7489	7686	7402	8191	8348	8022	7469	7578	8928	9016	7347	8178
12726	8.589	547.163	[(2R,3S,4S,5R,6R)-6-[(2S,3S,4S,5R)-3,4-dihydroxy-2,5-bis(hydroxymethyl)oxolan-2-yl]oxy-3,4,5-trihydroxyoxan-2-yl]methyl (E)-3-(4-hydroxy-3,5-dimethoxyphenyl)prop-2-enoate	[M-H]-	TRUE	547.167	C23H32O15	TRUE	TRUE	TRUE	66.6	76.3	86.1	547.16504:1411 548.16839:243 549.17175:972	147.00484:9 164.04559:19 180.66165:9 205.04613:65 205.06633:19 223.0526:46 223.08:19 238.04774:9 265.06644:28 323.08945:9 341.07651:9 547.16321:130	1411	1496	1237	1227	1893	402	495	177	412	425	451	415	566	597	513	501	431	666	449	361	272	383	233
28878	9.371	535.14	6,8-Di-C-beta-D-arabinopyranosylapigenin	[M+H]+	TRUE	535.144	C25H26O13	TRUE	TRUE	TRUE	86.1	92.6	75.7	535.14227:252182 536.14562:86181 537.14898:19862	115.05585:19 121.02399:56 175.03702:37 186.0262:19 189.01443:37 199.03502:37 203.03163:56 211.12968:19 215.02589:37 217.04869:19 269.04785:19 275.06842:19 280.07504:37 281.09647:37 283.05936:37 287.06546:19 294.05005:93 295.05539:724 305.07745:37 307.05792:653 308.06296:37 309.06961:93 313.06775:130 319.06018:111 320.06696:37 321.07028:265 321.12085:38 323.05371:56 324.04388:39 324.05661:76 325.0…	239529	289993	252182	282709	273800	991	1079	1190	1240	1375	1384	1102	985	1402	1312	1668	1992	2885	3228	3364	3664	3528	3468
2948	1.612	123.056	NICOTINAMIDE	[M+H]+	TRUE	123.055	C6H6N2O	TRUE	TRUE	TRUE	90.4	85.1	87.3	123.05359:1180 124.05694:877 125.0603:482	53.04806:28 55.93403:19 77.04339:28 78.03525:37 79.05479:19 80.05062:56 123.05553:37	591	673	670	739	787	1132	1216	1308	1441	1460	1302	1012	985	1102	1045	958	1024	1180	1196	1280	1252	1516	1281
13325	0.811	565.052	UDP-D-glucose	[M-H]-	TRUE	565.048	C15H24N2O17P2	TRUE	TRUE	TRUE	61	76.5	84.6	565.05347:2649 566.05682:345 567.06018:483	186.0166:19 241.0312:37 266.80432:19 268.94577:37 298.91876:19 318.98151:19 323.01999:56 323.02509:167 529.77722:19 565.05475:111	2967	2913	2679	2834	2722	2932	2319	2077	1864	1478	1967	3158	2754	1938	1754	2320	2014	3353	3232	2355	2649	2240	2454
4193	33.474	283.262	Stearic acid	[M-H]-	TRUE	283.264	C18H36O2	TRUE	TRUE	TRUE	63.9	88	76.4	283.26431:2497 284.26766:464 285.27102:174	283.25858:317	2661	3513	3452	2760	2834	3248	2239	2272	2333	2860	2545	2676	2295	2764	2497	2582	2806	2536	2098	2392	2371	2761	3822
22533	13.401	437.118	Beta-Peltatin	[M+Na]+	TRUE	437.121	C22H22O8	TRUE	TRUE	TRUE	83	84.3	75.1	437.11755:3160 438.1209:1023 439.12426:296	391.04752:19 437.12234:130 437.16071:37	1131	1200	1210	1009	980	1986	1983	2214	2535	2754	2750	1880	1738	1732	2079	2494	2074	2138	2080	2326	3148	3160	2960
4953	0.848	175.118	Arginine	[M+H]+	TRUE	175.119	C6H14N4O2	TRUE	TRUE	TRUE	90	74.2	93.7	175.11877:3074 176.12212:460 177.12548:20	60.06073:56 68.04723:19 70.06706:379 70.08006:57 72.11045:19 111.01255:19 116.06738:37 120.95361:19 130.11052:37	1753	1990	2198	2214	2282	3167	3194	3318	3641	3541	3444	4395	4426	4258	4285	4460	4576	2560	2536	3074	3054	2861	3101
9591	8.752	447.09	Luteolin-6-C-glucoside	[M-H]-	TRUE	447.093	C21H20O11	TRUE	TRUE	TRUE	87.6	87.5	73.8	447.09131:15547 448.09466:4379 449.09802:615	57.03936:3 59.0154:21 59.03167:11 62.05812:3 87.02444:3 104.23769:3 133.02675:11 149.02194:8 161.04538:13 164.01248:3 191.04259:8 213.4731:3 225.05455:8 225.16466:8 284.03116:24 285.04062:135 297.03821:146 298.04614:69 299.05331:50 299.08749:13 304.58994:3 311.05545:32 324.03006:11 325.03946:40 326.01477:11 326.04538:8 327.05026:1277 328.34564:8 339.05283:98 341.05954:16 351.04691:5 351.05219:11 …	15820	15547	16088	14039	14855	355	134	274	165	137	201	156	458	93	132	139	92	142	93	95	318	121	120
17169	1.016	365.103	Methylophiopogonanone A	[M+Na]+	TRUE	365.1	C19H18O6	TRUE	TRUE	TRUE	94.4	90.8	92.7	365.10349:251298 366.10684:47097 367.1102:12922	143.02873:19 182.88118:19 184.46704:93 185.0407:6307 185.61525:37 202.41354:111 202.5441:74 202.86363:65 203.05266:17394 203.20757:416 203.2941:130 203.40883:56 204.05153:93 204.0737:37 205.03262:37 207.65837:37 326.67053:19 347.08844:37 363.9556:93 364.17108:56 365.10367:12225 365.31137:299 365.43817:74 365.55423:56	203702	209122	239051	241949	251298	334507	333105	386722	401892	337369	390302	306978	282503	278159	322920	278811	334309	241523	235622	274134	233376	303726	235146
13820	8.17	579.176	Naringin	[M-H]-	TRUE	579.172	C27H32O14	TRUE	TRUE	TRUE	82.4	65.6	78.2	579.17621:72463 580.17956:25950 581.18292:7317	298.04626:31 312.06454:43 313.06265:19 327.04785:56 339.05042:93 341.0571:25 353.06238:31 357.05426:37 367.03891:19 368.14297:19 369.05887:1322 381.05527:99 383.07193:25 397.06201:19 397.80203:19 399.07263:1415 411.06546:136 413.09683:31 423.05292:43 423.07614:74 429.0835:393 435.06546:31 441.077:216 443.10684:25 453.08258:80 459.08987:1519 465.06976:19 471.08838:376 483.09271:31 487.54837:25 487…	60226	62729	72463	52099	64995	1285	372	408	227	325	920	168	994	227	263	375	239	361	249	236	720	185	499
15262	9.016	623.157	Flavone base + 3O, 1MeO, C-Hex-Hex	[M-H]-	TRUE	623.161	C28H32O16	TRUE	TRUE	TRUE	91.6	86.8	87.7	623.15784:57383 624.16119:23731 625.16455:4429	59.02079:84 59.0273:37 61.99363:9 71.01579:37 83.01645:9 87.04953:9 89.02534:139 101.01794:19 101.02361:56 107.03751:9 113.0211:65 119.03342:223 127.80334:9 132.72437:9 144.37772:9 155.88806:9 179.05254:74 298.03738:19 299.05676:28 308.02451:84 312.06796:46 322.05502:29 323.0563:1300 325.06857:28 340.05792:28 341.06332:158 353.05817:121 355.07922:37 365.0553:56 365.06879:65 367.07791:19 371.08008…	57383	57196	57688	55587	55601	338	279	217	422	287	292	437	552	252	238	409	426	624	265	351	478	296	333
13247	9.776	563.136	Flavone base + 3O, C-Pen-Hex	[M-H]-	TRUE	563.141	C26H28O14	TRUE	TRUE	TRUE	88.6	81.9	79.7	563.13843:37911 564.14178:14406 565.14514:2151	59.01431:56 59.02299:93 71.0134:37 87.00996:19 89.02528:93 95.01283:37 101.02208:37 101.04478:19 113.02094:56 119.03477:167 175.01276:19 183.04013:19 269.05569:19 282.04373:74 293.03812:599 293.07196:152 309.06229:19 311.05298:111 322.03366:37 323.05521:167 323.0755:74 327.12177:37 335.0495:37 339.98129:19 341.06216:148 341.09082:111 347.05728:19 353.07019:56 365.06479:56 381.87106:42 382.05862:3…	38428	42088	39759	37911	41005	126	128	193	131	132	176	180	94	146	285	150	99	154	142	183	266	198	263
32552	23.922	593.275	Ganoderic Acid F	[M+Na]+	TRUE	593.27	C32H42O9	TRUE	TRUE	TRUE	85.2	72.5	74.9	593.2702:17043 594.27355:6062 595.27691:1265	310.30356:19 314.16452:9 355.07831:19 459.21371:19 460.20941:28 506.24255:19 520.22272:19 531.43457:9 533.25183:121 534.25623:46 552.26813:9 561.23383:19 565.27722:19 575.26465:19 587.33899:9 591.35846:19 592.34399:20 593.21344:29 593.27191:2469 593.54352:25	17043	18891	20018	19106	17990	871	1142	1522	1834	1329	565	679	884	1038	1158	784	570	1845	1971	3643	3175	1912	1158
35041	8.616	633.138	5,6,7,40-Tetrahydroxyisoflavone-6,7-di-o-b-D-glucopyranoside	[M+Na]+	TRUE	633.143	C27H30O16	TRUE	TRUE	TRUE	84.7	84.2	82.2	633.14648:1104 634.14983:258 635.15319:548	411.98935:19 561.95551:19 633.14001:186 633.172:74	1104	1800	2237	2958	2853	27	36	37	66	32	46	68	53	51	56	39	53	42	28	44	44	41	35
2320	0.988	191.055	D-(-)-quinic acid	[M-H]-	TRUE	191.056	C7H12O6	TRUE	TRUE	TRUE	66.1	78.5	86.8	191.05464:5687 192.05799:740 193.06135:336	59.01566:37 67.02975:19 69.0379:37 85.03268:130 85.04439:56 87.00932:56 90.96341:19 93.03193:56 108.02335:19 111.00839:74 127.05402:19 191.04501:37 191.05672:278	3587	3405	4215	4097	4151	4978	4804	5466	3441	4721	4708	5604	5340	5530	5168	5015	11271	5687	4768	5838	4667	6366	5620
9283	3.565	268.102	Adenosine	[M+H]+	TRUE	268.104	C10H13N5O4	TRUE	TRUE	TRUE	88.4	76.1	83.9	268.1044:703 269.10775:115 270.11111:63	57.03514:3 81.07349:1 119.03796:7 135.63779:3 136.06226:134 152.05446:6 180.87138:3 264.53275:1 268.1217:3	1505	2114	2204	2688	2927	2689	3014	3840	3673	1778	1915	1545	2012	2000	1602	950	703	2837	2309	3208	2558	2279	1860
9589	15.138	273.108	3-(2-hydroxy-4-methoxyphenyl)-3,4-dihydro-2H-1-benzopyran-7-ol	[M+H]+	TRUE	273.11	C16H16O4	TRUE	TRUE	TRUE	82.8	61.2	83.7	273.11288:663 274.11623:353 275.11959:203	201.07185:19 273.1185:19	987	851	921	1098	952	830	664	545	663	592	553	718	617	648	599	549	586	740	654	595	623	573	605
4286	15.356	285.075	Sakuranetin	[M-H]-	TRUE	285.077	C16H14O5	TRUE	TRUE	TRUE	91.8	82.7	84.7	285.07681:7510 286.08016:1441 287.08352:131	65.00584:32 83.05184:5 89.00611:14 91.02142:14 93.03885:74 94.65224:5 97.02881:32 97.05106:14 118.6883:23 119.04993:779 119.78873:14 120.05148:23 121.02618:42 122.00013:14 132.99571:5 139.04309:9 149.99536:51 150.01091:14 164.00909:32 164.50111:9 165.01744:680 166.01979:19 176.00787:19 179.03551:19 191.03729:19 249.07635:5 256.0679:5 270.05136:14 285.07816:84 285.1282:14	2540	2919	3052	3114	3292	7510	7440	6858	7064	6688	7158	4111	5367	3279	4625	3176	4018	8560	8319	6547	6521	7777	6931
28057	1.008	522.199	Melezitose	[M+NH4]+	TRUE	522.203	C18H32O16	TRUE	TRUE	TRUE	93.2	91.6	94.9	522.2066:15521 523.20995:11424 524.21331:4278	85.02949:37 97.03187:37 127.04435:74 131.3893:19 145.04768:74 145.07318:19 163.05537:56	10849	17428	20239	29043	19792	9755	9338	13468	10684	10229	12839	10142	12053	10155	15521	14934	10268	8491	11205	9970	12114	11477	11275
16873	9.968	361.227	Kirenol	[M+Na]+	TRUE	361.23	C20H34O4	TRUE	TRUE	TRUE	76.8	60.4	80.9	361.22849:2517 362.23184:418 363.2352:119	154.06409:19 160.0946:37 176.05643:19 186.08034:19 189.07291:56 230.15938:19 361.23218:186	687	1189	829	1182	1203	2359	2245	2316	2780	2912	3394	2517	2263	2956	2583	3579	4000	2175	1663	3195	3031	2988	1837
26269	8.422	493.138	7-hydroxy-2-(4-hydroxy-3,5-dimethoxyphenyl)-5-[(2S,3R,4S,5S,6R)-3,4,5-trihydroxy-6-(hydroxymethyl)oxan-2-yl]oxychromen-4-one	[M+H]+	TRUE	493.134	C23H24O12	TRUE	TRUE	TRUE	88.7	89.2	83	493.13797:2960 494.14132:926 495.14468:407	315.04764:31 316.06064:25 331.08063:371	1227	1793	1934	2301	2960	63	88	113	59	109	189	76	83	93	98	113	146	63	83	138	105	155	111
9009	6.66	263.172	Oxysophocarpine	[M+H]+	TRUE	263.17	C15H22N2O2	TRUE	TRUE	TRUE	88.4	88.9	90.7	263.17209:887 264.17544:269 265.1788:1710	113.99372:6 118.76576:3 122.10233:6 129.8196:3 136.11162:9 138.12645:9 147.08437:6 150.12654:12 159.06937:6 177.13889:9 187.0889:6 203.11868:12 219.05244:6 233.1244:6 245.16393:68 245.18161:15 263.11337:9 263.1752:96	57	59	69	81	108	129	149	258	887	126	105	98	108	186	138	83	101	89	104	116	190	91	80
4439	15.512	291.192	FA 18:4+1O	[M-H]-	TRUE	291.194	C18H28O3	TRUE	TRUE	TRUE	88.8	64.8	86	291.19394:688 292.19729:0 293.20065:94	121.13371:5 185.1217:9 255.13901:5 291.19254:14	688	625	468	542	659	1324	1093	817	1274	753	1006	724	700	565	449	559	594	787	852	1009	1026	689	603
22993	24.788	443.394	(3beta)-lup-20(29)-ene-3,28-diol	[M+H]+	TRUE	443.39	C30H50O2	TRUE	TRUE	TRUE	74.8	71.7	68.2	443.39664:1278 444.39999:331 445.40335:397	195.17325:19 299.20779:19 443.33844:93	632	758	559	739	740	1278	1423	1568	2013	2058	1615	1418	1872	1774	1740	1946	2662	1576	1616	1811	2011	2048	1985
37335	9.963	677.174	Podophyllotoxin O-furfurylidene-beta-D-glucopyranoside	[M+Na]+	TRUE	677.18	C33H34O14	TRUE	TRUE	TRUE	88.9	79.2	86.7	677.17438:2019 678.17773:1170 679.18109:520	347.08337:19 347.09653:84 515.11829:19 554.99384:9 631.00476:19 677.14368:47 677.16571:289 677.49634:28	958	979	1518	2019	1862	165	76	111	210	183	178	127	171	245	216	350	357	158	118	145	194	261	210
19481	9.012	395.092	(2S,3S,4S,5R,6S)-6-[4-(2-carboxyethyl)-2-methoxyphenoxy]-3,4,5-trihydroxyoxane-2-carboxylic acid	[M+Na]+	TRUE	395.095	C16H20O10	TRUE	TRUE	TRUE	87.1	93.1	77.6	395.09421:2652 396.09756:604 397.10092:502	163.01414:19 215.06873:9 219.05948:56 261.07825:19 395.09595:176	623	701	980	964	1120	1446	1489	1735	2118	2198	2855	1526	1600	2172	2652	2786	3411	1712	2073	3135	3083	3592	3794
40786	21.152	745.416	Prosapogenin A	[M+Na]+	TRUE	745.41	C39H62O12	TRUE	TRUE	TRUE	81.4	64.6	75	745.4162:902 746.41955:440 747.42291:581	99.07392:19 184.06784:37 184.07167:74 184.09273:37 745.41046:149 745.44513:93	612	863	803	902	803	111	135	136	188	117	156	100	82	143	172	192	165	123	167	199	167	202	182
35402	23.728	639.382	Decahydrogambogic Acid	[M+H]+	TRUE	639.387	C38H54O8	TRUE	TRUE	TRUE	81.4	60	82.1	639.38165:18783 640.385:7832 641.38836:2715	437.33868:19 474.14804:19 475.28592:74 477.03543:19 489.28442:37 489.29065:37 529.32458:19 533.31671:56 547.33643:56 559.94366:19 581.35748:207 581.3949:93 582.25293:37 583.24109:93 595.26068:19 621.38708:56 621.42932:19 637.52112:38 639.35791:58 639.39716:2138 639.49353:199	14483	18850	18783	16854	17733	259	262	319	377	426	377	303	387	383	325	415	682	308	327	348	504	359	344
26499	18.792	496.336	LPC 16:0	[M+H]+	TRUE	496.34	C24H50NO7P	TRUE	TRUE	TRUE	87.3	84.5	81.9	496.33939:22031 497.34274:5888 498.3461:1767	60.0816:9 71.36449:5 86.09459:33 104.10812:343 123.13036:5 125.0013:51 125.01234:23 166.06218:19 181.02385:5 183.49733:14 183.63121:19 183.9814:20 184.07332:1432 258.1066:33 313.27121:56 313.29868:28 419.25562:42 478.32642:223 494.79034:14 496.31116:19 496.3363:753	13449	13360	14951	15297	16377	20919	21371	23485	24355	26370	26090	21223	22059	22031	23507	21961	26849	26519	27919	29354	30949	33636	29942
7519	7.56	383.194	Isorhynchophylline	[M-H]-	TRUE	383.198	C22H28N2O4	TRUE	TRUE	TRUE	87.3	75	75	383.19104:525 384.19439:328 385.19775:164	383.19379:25	436	499	487	268	501	819	307	445	525	400	598	519	550	508	455	293	414	460	400	280	588	338	541
5012	13.724	311.219	1,2-Dihydroxyheptadec-16-yn-4-yl acetate	[M-CH3]-	TRUE	311.221	C19H34O4	TRUE	TRUE	TRUE	90.3	69.5	89.9	311.21881:8231 312.22216:1545 313.22552:10632	97.07143:9 111.09422:9 125.10736:37 139.10899:74 149.09537:9 155.11444:19 165.12724:28 169.43896:9 171.10204:121 171.11681:46 182.13759:19 195.13527:56 209.1153:9 211.13258:28 249.21324:19 249.2177:37 257.20624:9 275.20258:19 291.21243:19 293.20773:357 294.20914:19 311.2204:204 311.2428:37	7702	7629	7606	8255	7907	13080	9473	8928	9483	9607	9782	8237	7658	6747	7354	6605	8077	9254	8231	7619	7492	6172	8321
24856	8.645	471.351	(E,6S)-7-hydroxy-2-methyl-6-[(10S,13S,14S,17S)-4,4,10,13,14-pentamethyl-3-oxo-1,2,5,6,7,11,12,15,16,17-decahydrocyclopenta[a]phenanthren-17-yl]hept-2-enoic acid	[M+H]+	TRUE	471.347	C30H46O4	TRUE	TRUE	TRUE	88.5	73.8	87.8	471.34729:1055 472.35064:407 473.354:176	105.0695:9 177.05031:19 214.06703:9 245.1837:19 357.11914:9 453.33929:19 471.35181:139	781	870	1083	1361	1429	1035	1399	1768	1665	1323	2442	1234	1415	1371	1420	1568	2893	920	1268	1055	999	1660	2241
10541	15.538	285.073	Acacetin	[M+H]+	TRUE	285.076	C16H12O5	TRUE	TRUE	TRUE	92.8	85	90.1	285.07581:5221 286.07916:1004 287.08252:1253	55.06631:3 57.07232:3 67.02216:3 69.07376:3 77.03961:3 81.07427:3 91.0536:3 93.07429:3 95.08961:3 105.06568:3 105.07436:3 107.09373:4 109.10133:4 115.05276:3 117.06915:4 119.04914:11 119.06609:6 119.08765:6 121.0271:6 121.1001:7 124.01752:14 127.00784:3 129.06982:7 131.0482:4 133.10352:9 135.12065:6 137.96748:3 139.05228:3 141.06689:3 143.08755:4 145.02397:10 145.10217:14 147.11719:6 153.07964:3 …	2172	2211	2229	2425	2311	6559	6891	7524	7833	7638	6944	5088	5685	5011	5221	5007	4665	6189	6247	7018	7549	7461	5975
5251	2.751	182.08	Tyrosine	[M+H]+	TRUE	182.081	C9H11NO3	TRUE	TRUE	TRUE	97.8	94.5	99	182.07971:4665 183.08306:627 184.08642:185	51.02473:4 51.03482:4 53.04993:4 55.93706:4 55.94551:3 59.93215:4 65.04262:17 67.05585:4 72.94171:4 77.03495:6 77.03991:36 79.05631:3 87.04363:1 90.77548:7 90.9706:3 91.05678:235 91.49506:3 93.06799:7 94.04281:3 95.05023:80 95.06538:20 95.9745:3 97.97054:3 100.93504:6 103.05624:9 104.90437:3 107.04914:21 107.06083:4 108.0827:4 109.06374:7 117.0593:7 118.06483:16 118.08016:6 119.05001:199 119.6576…	1688	2138	2724	3170	1827	3585	2319	2751	4910	5077	5229	3788	4002	3627	3724	5457	6001	1710	3019	3621	4139	4326	4665
9108	7.706	265.152	Feruloyl putrescine	[M+H]+	TRUE	265.155	C14H20N2O3	TRUE	TRUE	TRUE	85.4	93.5	60.7	265.15445:20134 266.1578:3752 267.16116:571	72.08228:65 77.04107:19 89.04198:84 89.10592:37 98.06098:19 103.05576:9 106.04182:19 117.03263:630 119.05389:19 121.06449:19 134.03346:65 144.57222:28 144.68427:21 145.02913:2997 145.23488:19 145.39313:19 145.53954:19 145.81212:19 146.03891:19 147.04192:28 149.05824:260 159.5686:19 162.02611:19 172.87071:19 177.05475:3840 177.28772:37 178.05161:28 181.03995:19 248.12828:121 248.14607:37 265.14871…	4454	5840	5903	5589	5432	12789	12734	12910	13377	13540	15177	8024	8267	7965	9417	8425	8740	20134	19200	18685	23000	24676	22316
4089	1.533	152.055	Guanine	[M+H]+	TRUE	152.057	C5H5N5O	TRUE	TRUE	TRUE	91.5	84.7	84.7	152.05629:1630 153.05964:261 154.063:186	109.05028:19 110.03567:62 135.0293:173 152.05321:19	938	1065	1106	988	1169	1282	1408	1471	1673	1574	1527	1470	1539	1630	1618	1670	1547	7452	7807	7638	8636	8247	8905
27819	17.227	518.322	LysoPC(18:3(9Z,12Z,15Z))	[M+H]+	TRUE	518.326	C26H48NO7P	TRUE	TRUE	TRUE	85.1	86.1	82.7	518.32275:5983 519.3261:1586 520.32946:594	86.10099:9 104.10789:107 125.00099:14 184.07275:269 324.32095:9 335.25061:14 500.32025:51 500.35498:19 518.32428:153	6410	5400	5736	5979	5983	2947	2906	2833	3619	3230	3357	2713	2693	2899	2839	2630	3683	4033	3381	3999	2907	2573	4823
16291	16.228	355.117	L-Asarinin	[M+H]+	TRUE	355.12	C20H18O6	TRUE	TRUE	TRUE	83.6	71.1	75	355.11597:3414 356.11932:760 357.12268:413	119.04916:12 145.03079:6 147.04359:56 177.85771:6 211.07353:12 254.88435:12 261.08273:6 265.08472:19 355.07199:19 355.18903:478	2169	1767	1901	1994	2035	3232	3809	3798	4228	4149	3848	3360	3829	3357	3414	3604	3225	3790	3835	4329	4662	4492	4318
1359	0.766	133.015	D-(+)-Malic acid	[M-H]-	TRUE	133.014	C4H6O5	TRUE	TRUE	TRUE	61.7	66.2	70.9	133.01523:55653 134.01858:2802 135.02194:959	59.01552:111 59.0307:56 70.79874:37 71.01505:1167 71.06263:56 72.99477:692 87.01354:19 89.02496:111 89.03827:56 115.00304:552 117.68703:19 133.01134:74 133.0276:37	100098	96756	97479	93728	102013	55140	56861	56276	53849	51978	55741	62024	63630	63138	55653	59168	57507	60753	53064	53929	54566	57395	49041
12780	8.792	549.118	Syringetin 3-acetylglucoside	[M-H]-	TRUE	549.122	C25H26O14	TRUE	TRUE	TRUE	81.8	67.3	65.5	549.12109:7168 550.12444:3153 551.1278:790	325.09338:6 337.09924:12 339.04819:31 339.06638:19 357.05737:12 367.90515:6 369.06204:124 381.05579:37 399.07037:247 399.10138:62 411.06607:19 423.06808:25 429.08417:56 429.10754:37 439.07617:6 441.07474:56 453.07733:25 459.09067:396 467.46301:6 471.08612:31 489.09622:105 501.10843:12 531.10785:43 548.75153:13 549.12518:960	7963	7150	7474	7168	7824	139	146	117	62	216	78	136	114	49	110	196	112	132	76	191	150	71	139
23786	0.964	455.114	Asperulosidic acid	[M+Na]+	TRUE	455.11	C18H24O12	TRUE	TRUE	TRUE	83.6	68.9	75	455.11246:17404 456.11581:4087 457.11917:3657	112.89325:56 234.96539:19 452.60626:19 454.52121:39 455.11423:923	19218	23720	23400	25708	24099	13465	13669	15268	16374	16863	16378	16942	16670	15861	18043	17404	17923	16729	18914	21202	21010	23231	19798
3844	0.893	147.075	Glutamine	[M+H]+	TRUE	147.076	C5H10N2O3	TRUE	TRUE	TRUE	87.3	78.7	83.3	147.07614:11564 148.07949:11964 149.08285:2150	55.94197:38 56.05182:151 60.98974:19 69.98434:74 70.97857:37 84.03886:63 84.04533:1395 85.02777:56 102.05296:37 130.04268:37 130.04912:111	5301	6675	7258	6780	7118	4666	5998	5961	6282	6972	6373	10094	10849	11564	12017	12518	12603	7237	6369	7471	7618	8394	7819
8889	1.044	261.039	Glucose-6-phosphate	[M+H]+	TRUE	261.037	C6H13O9P	TRUE	TRUE	TRUE	81.5	69.5	83	261.03931:5478 262.04266:1664 263.04602:3744	61.02829:19 69.06856:19 80.98209:19 85.03011:93 95.08181:19 97.0463:19 98.98312:167 101.01993:19 116.96098:37 127.03822:56	3181	4978	3976	5478	4895	1448	617	663	768	447	590	498	698	599	689	472	651	999	1040	574	570	581	698
14707	11.829	336.126	Berberine	[M]+	TRUE	336.123	C20H18NO4	TRUE	TRUE	TRUE	81.1	72.3	78.3	336.11935:523 337.1227:338 338.12606:96	236.79987:6 292.09369:19 306.07291:12 318.08136:6 320.08841:25 321.10187:25 325.61484:6 336.12347:62	118	139	115	156	158	382	531	541	684	365	302	199	285	304	265	195	152	545	523	524	569	458	537
20424	24.016	765.486	Ginsenoside Rg5	[M-H]-	TRUE	765.479	C42H70O12	TRUE	TRUE	TRUE	88.2	69.3	75	765.47968:161565 766.48303:76309 767.48639:58344	71.01705:37 80.96284:37 103.45702:19 136.9976:19 148.99507:37 156.08238:19 207.02792:19 225.00934:204 225.32703:19 255.2332:74 273.22916:19 277.20734:37 483.27322:37 492.80804:19 506.24918:37 509.2355:167 535.56018:19 537.26984:148 705.48468:37 740.11139:19 742.47473:204 763.02502:245 763.0484:227 763.4812:56 764.49554:56 764.65942:37 765.31525:122 765.48706:52053 765.56519:814 765.95966:3436	168502	157362	170967	161565	156570	12409	13439	10590	8635	11293	10804	19397	15700	17077	15292	15825	14631	59524	53096	60602	63940	67283	55001
6637	7.396	359.101	3-Methoxy-4-hydroxyphenylglycol glucuronide	[M-H]-	TRUE	359.098	C15H20O10	TRUE	TRUE	TRUE	82.3	66.8	69.6	359.09473:1771 360.09808:351 361.10144:117	59.01542:14 71.01849:14 85.03926:5 89.02877:28 119.03652:14 119.05193:14 138.02718:9 143.04837:5 153.05588:28 165.02228:9 181.01596:19 182.02762:14 191.07018:5 196.03612:19 197.04329:70 209.06117:5 211.05978:14 217.00867:5 224.02992:9 235.2258:5 239.04897:23 299.0932:9 315.13242:9 359.0863:23 359.10236:28 359.11572:14	1842	1487	1736	1406	1800	1731	1815	1458	1296	1465	1321	2166	2290	1944	1953	1821	2112	2509	2118	1987	1857	1877	1771
2969	7.643	233.128	N-(4-aminobutyl)-3-(4-hydroxyphenyl)prop-2-enamide	[M-H]-	TRUE	233.126	C13H18N2O2	TRUE	TRUE	TRUE	91.1	76.7	82.2	233.1275:623 234.13085:0 235.13421:0	119.05044:204 191.1366:19 233.1265:56 233.17821:56	358	175	257	292	280	595	374	616	434	516	420	406	595	396	380	276	218	854	882	429	617	616	623
14999	17.25	339.204	Pseudocopsinine	[M+H]+	TRUE	339.207	C21H26N2O2	TRUE	TRUE	TRUE	84.1	71.1	75	339.20358:3124 340.20693:820 341.21029:1349	165.0085:19 339.18347:37 339.18869:130	939	898	879	744	830	1377	1329	1221	1242	1268	1763	2894	3124	2721	2416	2162	3175	1634	1293	1622	1417	2091	1630
22232	9.48	433.117	5,7-dihydroxy-2-(4-hydroxyphenyl)-6-[3,4,5-trihydroxy-6-(hydroxymethyl)oxan-2-yl]chromen-4-one	[M+H]+	TRUE	433.113	C21H20O10	TRUE	TRUE	TRUE	83.1	87.7	74.4	433.11691:2480 434.12026:738 435.12362:985	182.07515:19 279.08597:19 283.06158:74 309.10681:19 313.06775:93 323.08926:19 337.09326:37 349.06714:19 379.0719:37 379.11588:19	1783	2180	2236	2480	2624	634	701	769	780	825	936	629	739	796	757	853	940	647	621	803	947	1084	867
5011	13.538	311.219	FA 18:2+2O	[M-H]-	TRUE	311.221	C18H32O4	TRUE	TRUE	TRUE	90.1	86.2	87.2	311.21716:6192 312.22051:575 313.22387:7343	136.09163:19 171.09933:37 181.16655:19 193.11873:37 237.18439:19 267.23151:19 278.0939:19 293.2117:589 311.21951:241	5483	5822	6446	7074	6896	9404	7067	6632	6081	6190	7199	6224	6647	5254	6183	5253	5988	6192	6528	6746	5739	4544	6205
1158	8.529	121.028	Benzoic acid	[M-H]-	TRUE	121.029	C7H6O2	TRUE	TRUE	TRUE	71.5	94.7	94.6	121.03062:7799 122.03397:1144 123.03733:88	65.04065:19 80.00037:9 91.03131:28 92.02783:367 93.03931:65 106.00599:9 120.02229:83 121.02946:512	7720	7799	6881	8082	7248	23371	23912	15098	14899	9835	10332	17833	12255	10318	7165	6635	6819	23457	22299	15064	13403	11294	9144
12215	1.01	307.107	Cimifugin	[M+H]+	TRUE	307.11	C16H18O6	TRUE	TRUE	TRUE	80	62.2	75	307.10495:5443 308.1083:1287 309.11166:429	186.96536:19 307.11179:56	3502	4527	4784	7201	5794	5082	6137	6228	4742	5368	5345	3929	5000	4597	6174	5917	5325	5225	4329	5443	4515	6108	5966
14923	25.996	338.339	Erucamide	[M+H]+	TRUE	338.342	C22H43NO	TRUE	TRUE	TRUE	85.3	83.6	81.7	338.33853:14122 339.34188:4683 340.34524:571	53.04002:5 55.05623:19 57.07485:32 57.08551:19 58.06659:9 67.05726:14 69.07536:37 71.05078:14 71.08767:32 72.08849:9 79.05392:14 79.20335:5 81.07345:19 83.08755:51 85.09772:9 85.10294:14 86.0614:19 91.05407:5 93.06795:19 93.08837:5 95.08733:32 97.06441:23 97.10196:51 100.07735:19 104.97215:5 107.08545:28 107.84782:5 109.09888:23 111.0775:19 111.11619:28 114.09084:28 118.06141:5 121.10216:42 121.1…	10616	10172	11285	10728	11209	13494	13067	14122	14366	13388	18592	7538	6221	6915	4131	4334	5395	8688	6569	8509	8486	7537	5238
23937	23.581	457.356	Ganodermanondiol	[M+H]+	TRUE	457.36	C30H48O3	TRUE	TRUE	TRUE	84	89.5	75.9	457.35532:2118 458.35867:803 459.36203:640	457.29352:168 457.35391:211 457.37805:74	1866	1577	2299	1928	1965	2190	1983	2106	2380	2304	2506	2010	2054	2207	2197	2331	2822	2118	1920	2336	2243	2554	2565
29295	11.258	541.165	8-Prenyldihydrokaempferol 7-glucoside	[M+Na]+	TRUE	541.17	C26H30O11	TRUE	TRUE	TRUE	85.3	88	81	541.16608:730 542.16943:87 543.17279:679	541.16492:130	270	362	381	380	419	882	875	922	963	1088	1203	1386	1639	1701	1664	2044	2375	619	616	730	787	915	861
8744	0.907	258.107	sn-Glycero-3-phosphocholine	[M]+	TRUE	258.11	C8H21NO6P	TRUE	TRUE	TRUE	83.8	84.9	66.3	258.11017:3185 259.11352:514 260.11688:162	58.07901:19 84:19 86.09703:56 104.10625:358 104.12641:74 120.97149:19 125.00214:186 125.01477:56 145.0154:37 158.4576:19 184.06972:56	2686	3185	3746	3608	3767	1354	1577	1766	1769	2123	2137	1724	1978	1949	1788	2183	2377	1691	2033	1924	2047	2143	2046
3019	9.208	237.079	3,4,5-Trimethoxycinnamic acid	[M-H]-	TRUE	237.077	C12H14O5	TRUE	TRUE	TRUE	85	67	68.3	237.07387:1105 238.07722:294 239.08058:196	80.96469:19 91.04041:19 117.03543:102 118.04077:46 119.05042:139 145.03024:346 146.02971:19 163.03915:28 237.07343:28	799	777	553	853	919	1733	2563	1668	1572	1926	1663	1533	1711	1582	1563	1344	1837	1726	1768	1431	1318	1105	1499
42689	8.656	783.262	Kuwanon H	[M+Na]+	TRUE	783.27	C45H44O11	TRUE	TRUE	TRUE	86	75	75	783.26801:938 784.27136:320 785.27472:278	783.25781:243	189	399	435	740	708	441	485	727	911	1148	1144	479	748	938	939	1083	1555	468	643	1083	1318	1530	1258
4738	22.109	301.214	Abietic acid	[M-H]-	TRUE	301.217	C20H30O2	TRUE	TRUE	TRUE	63.9	73	75	301.21912:14835 302.22247:1835 303.22583:765	255.23383:186 300.2738:76 301.21863:2595	10470	7213	10470	6563	7042	16334	19136	18487	17089	14711	13802	33618	35525	32739	30792	32141	28341	13394	15884	16065	14944	14835	11977
905	0.865	104.036	Serine	[M-H]-	TRUE	104.035	C3H7NO3	TRUE	TRUE	TRUE	61.8	88	63.8	104.03581:416 105.03916:150 106.04252:0	74.02793:19 74.03764:19 74.04858:19	512	648	391	390	505	488	437	398	297	331	424	347	406	395	353	284	288	426	266	318	346	339	416
24847	6.708	471.225	atractyloside A	[M+Na]+	TRUE	471.22	C21H36O10	TRUE	TRUE	TRUE	80.9	84	78.4	471.22699:20955 472.23034:5291 473.2337:886	86.04069:6 469.71545:6 471.15131:118 471.17276:31	2684	3248	3265	3845	3664	7735	9188	10664	10757	11446	11102	19653	23016	21584	20583	21487	20955	6565	6672	9852	10495	10259	8804
15639	8.073	347.13	(2R,3S,4S,5R,6S)-2-(hydroxymethyl)-6-(3,4,5-trimethoxyphenoxy)oxane-3,4,5-triol	[M+H]+	TRUE	347.134	C15H22O9	TRUE	TRUE	TRUE	83.7	78.6	79.7	347.13:1435 348.13335:517 349.13671:406	125.06007:19 153.05133:43 154.05882:37 170.0535:19 172.07133:12 185.07866:173	602	672	845	817	875	1142	1295	1271	1435	1458	1545	971	1261	1273	1254	1181	1439	1301	1221	1502	1441	1567	1689
12493	6.372	311.121	gamma-Glutamyltyrosine	[M+H]+	TRUE	311.124	C14H18N2O6	TRUE	TRUE	TRUE	89.5	89.2	89.3	311.12216:1384 312.12551:510 313.12887:365	84.04465:13 115.96615:3 119.04926:21 123.0434:24 130.0452:5 136.07741:56 143.0843:3 147.0437:29 165.05336:53 182.07478:5 182.0824:24 202.0907:13 221.08226:5 248.09535:13 294.10114:11	456	502	508	561	572	1174	1375	1535	1736	1995	2044	1162	1213	1338	1384	1385	1738	850	945	1152	1261	1355	1142
25310	17.768	478.292	4-[5-[[4-[5-[Acetyl(hydroxy)amino]pentylamino]-4-oxobutanoyl]-hydroxyamino]pentylamino]-4-oxobutanoic acid	[M+NH4]+	TRUE	478.287	C20H36N4O8	TRUE	TRUE	TRUE	80.4	81.4	73.7	478.2919:8211 479.29525:2275 480.29861:533	67.05794:28 81.07037:19 95.08949:19 109.10117:19 119.09362:9 123.11511:19 133.10002:19 160.11613:9 245.21939:19 263.23499:19 306.28128:46 306.30844:19 336.4169:29 337.27438:949 478.36179:19	3042	3035	3314	3380	3614	3453	3947	4442	4174	3917	4574	4260	4397	4127	3773	4061	4553	4375	4599	6093	8211	10165	5057
21058	26.343	783.482	Ginsenoside Rg3(R-FORM)	[M-H]-	TRUE	783.49	C42H72O13	TRUE	TRUE	TRUE	85.1	62.6	75	783.48206:845 784.48541:280 785.48877:140	637.40973:9 783.4848:37	126	139	126	50	104	355	344	845	872	880	324	438	265	380	405	290	323	581	679	599	494	477	385
2208	0.898	181.07	Sorbitol	[M-H]-	TRUE	181.072	C6H14O6	TRUE	TRUE	TRUE	67	84.2	89.3	181.06989:5729 182.07324:448 183.0766:320	59.01754:247 59.02621:114 61.02398:19 71.0171:167 71.03256:37 73.0306:37 79.95775:19 85.02978:37 89.02435:93 99.00565:19 101.02552:74 106.9169:19	1558	1699	1459	1821	1763	5492	5729	4417	3049	2206	2684	2405	3102	1748	1448	1387	2061	2396	1981	1914	869	740	915
3536	7.619	139.038	4-Hydroxybenzoic acid	[M+H]+	TRUE	139.039	C7H6O3	TRUE	TRUE	TRUE	84.2	87.4	65.1	139.03737:881 140.04072:287 141.04408:387	95.04887:19 121.03069:56	2615	3051	3550	3484	3637	661	746	790	848	820	869	818	881	1046	1053	1060	1335	670	622	764	797	849	800
18102	8.486	377.142	Riboflavin	[M+H]+	TRUE	377.146	C17H20N4O6	TRUE	TRUE	TRUE	93.7	84.3	96.3	377.14359:939 378.14694:297 379.1503:1126	172.08052:19 198.07281:19 200.0983:9 243.08421:46 365.0719:9 377.142:46	813	906	948	1582	1353	1918	1361	1188	939	644	648	1403	1203	1052	766	620	572	1200	1275	1160	794	677	560
25773	25.971	941.502	Soyasaponin Bb	[M-H]-	TRUE	941.512	C48H78O18	TRUE	TRUE	TRUE	85.5	73.2	75	941.49573:7973 942.49908:7064 943.50244:5425	555.17816:19 627.22284:19 902.62524:9 905.50256:28 938.45349:19 941.49121:2192 941.82037:28	34	8034	8558	8787	10889	7973	39	76	56	19	5256	35	8421	16	229	53	52	110	24	63	7860	27	104
13538	16.873	571.283	[2-Hydroxy-3-[hydroxy-(2,3,4,5,6-pentahydroxycyclohexyl)oxyphosphoryl]oxypropyl] hexadecanoate	[M-H]-	TRUE	571.289	C25H49O12P	TRUE	TRUE	TRUE	91.7	87	89.5	571.2829:1719 572.28625:99 573.28961:99	152.99165:46 183.57677:9 241.00397:28 255.22423:19 255.23099:84 312.16092:9 391.22418:19 569.47589:19 571.28595:278	1719	1063	1035	1230	1190	3845	3076	2318	3885	2956	3233	2625	2020	1520	1965	2363	2317	2860	3381	3080	2980	3384	3304
34106	16.168	617.127	Tiliroside	[M+Na]+	TRUE	617.12	C30H26O13	TRUE	TRUE	TRUE	78.5	75.6	74.5	617.12677:773 618.13012:225 619.13348:114	135.09187:9 221.13269:9 606.69604:9 617.11871:102 617.17834:37	124	116	157	187	287	267	304	315	405	455	697	282	309	503	456	429	769	205	338	335	512	331	773
21614	10.752	799.476	Ginsenoside Rf	[M-H]-	TRUE	799.485	C42H72O14	TRUE	TRUE	TRUE	84.3	73.4	74.5	799.47943:1185 800.48278:833 801.48614:238	777.47009:9 799.43347:391	1395	1367	1111	1689	1409	1830	1244	1704	1097	771	1476	1566	1252	639	1497	1334	1816	1360	1185	933	871	1229	1400
15814	8.633	639.15	3-[(2S,3R,4S,5S,6R)-4,5-dihydroxy-6-(hydroxymethyl)-3-[(2S,3R,4S,5S,6R)-3,4,5-trihydroxy-6-(hydroxymethyl)oxan-2-yl]oxyoxan-2-yl]oxy-2-(3,4-dihydroxyphenyl)-5-hydroxy-7-methoxychromen-4-one	[M-H]-	TRUE	639.157	C28H32O17	TRUE	TRUE	TRUE	63.7	83	83.5	639.15448:339 640.15783:0 641.16119:0	630.61639:6 639.16589:74 639.18372:25	2345	2578	2657	2180	2477	141	132	63	191	106	228	396	515	265	339	352	300	210	210	111	169	266	258
25774	10.035	485.105	Tectoridin	[M+Na]+	TRUE	485.1	C22H22O11	TRUE	TRUE	TRUE	86.2	75.1	84.7	485.10541:4693 486.10876:1893 487.11212:344	322.04385:19 323.05023:93 483.8606:19 485.10336:186	3721	4693	4631	4631	4145	140	146	170	153	163	112	206	200	113	161	165	189	168	263	221	264	278	200
18517	1.018	383.074	irigenin	[M+Na]+	TRUE	383.07	C18H16O8	TRUE	TRUE	TRUE	83	88	84	383.07751:105208 384.08086:17615 385.08422:11171	383.08371:111	212842	243633	246482	264119	269019	81441	76855	89994	89572	77158	86851	89767	91303	90499	110251	95164	93549	105208	93164	112145	99387	117433	97472
10014	9.133	461.103	Flavone base + 3O, 1MeO, C-Hex	[M-H]-	TRUE	461.108	C22H22O11	TRUE	TRUE	TRUE	89.2	83.4	82.8	461.104:16330 462.10735:3759 463.11071:792	270.07251:19 284.04019:19 285.03534:56 297.03281:28 297.04742:28 298.04071:130 311.06232:19 313.03198:339 313.29172:9 326.03964:19 327.05219:28 341.06409:213 355.04266:19 357.05338:19 371.07526:19 383.07648:9 399.06876:19 446.09653:19 459.64218:56 460.58072:19 461.11093:4282 461.34131:84 461.4838:46	15178	15734	16330	16079	18202	524	202	136	105	156	284	182	315	107	112	33	39	179	196	177	391	146	99
25545	23.086	481.325	25R-Inokosterone	[M+H]+	TRUE	481.32	C27H44O7	TRUE	TRUE	TRUE	81.5	67.7	75	481.32547:2762 482.32882:975 483.33218:162	316.17169:19 355.21973:37 481.29245:260 481.31723:111 481.3544:56	430	712	378	1083	815	1630	2085	2218	2637	2143	3180	1790	1608	1462	1982	2303	1874	1806	1650	2073	2762	3537	2450
31723	8.765	579.163	Chrysin 7-O-beta-gentiobioside	[M+H]+	TRUE	579.17	C27H30O14	TRUE	TRUE	TRUE	85.9	75	75	579.16797:1771 580.17132:619 581.17468:353	579.17102:167	541	693	775	771	823	917	980	1058	1117	1241	1771	1038	1109	1272	1342	1740	1794	395	346	487	474	592	615
31726	10.179	579.177	Rhoifolin	[M+H]+	TRUE	579.171	C27H30O14	TRUE	TRUE	TRUE	77.3	78.2	75.8	579.18024:1128 580.18359:156 581.18695:0	233.08186:19 271.05835:130	707	602	440	670	802	964	814	785	1212	713	952	891	1128	836	789	686	1327	1041	667	1010	685	1870	1111
29294	8.511	541.154	(2R,3R)-3,5-dihydroxy-2-(4-hydroxyphenyl)-8-(3-methylbut-2-enyl)-7-[(2S,3R,4S,5S,6R)-3,4,5-trihydroxy-6-(hydroxymethyl)tetrahydropyran-2-yl]oxy-chroman-4-one	[M+Na]+	TRUE	541.16	C26H30O11	TRUE	TRUE	TRUE	87.9	79.2	85.3	541.15436:869 542.15771:270 543.16107:169	304.95959:19 379.09723:37 541.14612:111	729	1026	1081	869	834	246	222	288	237	274	343	285	293	359	457	440	521	244	267	357	316	340	378
3975	21.197	279.23	Linoleic acid	[M-H]-	TRUE	279.233	C18H32O2	TRUE	TRUE	TRUE	64.1	84.8	74.3	279.23325:80626 280.2366:15834 281.23996:1946	59.01183:28 59.01617:46 261.21396:19 261.22308:102 265.09937:9 276.99817:19 278.34109:46 278.53421:19 279.09039:22 279.20123:45 279.23425:7092 279.41351:162 279.53384:93 279.64951:46	80663	80626	80447	83179	80930	179622	174423	128013	125880	99722	104244	155547	133258	109025	91298	81061	88450	167049	159643	128878	109564	99423	90578
27636	13.104	515.155	2'',6''-Di-O-acetylononin	[M+H]+	TRUE	515.161	C26H26O11	TRUE	TRUE	TRUE	77.9	64.5	70.9	515.15704:5185 516.16039:1816 517.16375:370	109.02761:12 113.06136:6 145.02882:130 149.06482:19 176.50633:19 177.05434:771 275.1116:6 303.08994:93 515.15601:19	1799	1867	2253	2301	2287	4197	6153	7931	6714	7255	9829	15676	14102	12971	12747	16290	8031	5185	7143	8713	19279	18997	6792
14617	9.791	603.384	3-O-alpha-L-Arabinopyranosylechinocystic acid	[M-H]-	TRUE	603.391	C35H56O8	TRUE	TRUE	TRUE	91.5	83	75	603.38922:4915 604.39257:1174 605.39593:489	59.0177:14 565.40149:19 572.25861:5 603.32355:14 603.39288:516	4652	3589	3292	5423	3780	5781	6099	5900	4051	4915	3749	5755	5480	4773	4871	4189	4297	5113	5371	5002	4732	3927	3548
22695	1.016	439.225	N-(3-(dimethylamino)propyl)-2-((3,4,8,8-tetramethyl-2-oxo-2,8,9,10-tetrahydropyrano[2,3-f]chromen-5-yl)oxy)acetamide	[M+Na]+	TRUE	439.22	C23H32N2O5	TRUE	TRUE	TRUE	85.3	77.1	75	439.22452:361 440.22787:495 441.23123:0	115.01934:19 175.14536:19 180.99554:37 241.01703:19 272.94958:19 277.09048:225 336.10458:19 403.09799:19 439.12317:62 439.14389:1023	277	183	47	32	143	361	177	422	339	203	239	201	114	154	138	80	238	160	191	176	265	237	219
36675	2.098	664.108	beta-Nicotinamide adenine dinucleotide	[M+H]+	TRUE	664.116	C21H27N7O14P2	TRUE	TRUE	TRUE	88.5	78.8	83.1	664.11249:482 665.11584:97 666.1192:53	97.03629:1 136.06111:17 232.0838:11 232.10745:3 348.06216:6 428.03326:31 524.0639:23 542.05273:6 542.06592:11 574.78125:3 643.34174:1 664.11829:4	149	242	301	434	256	229	176	242	509	482	493	331	436	209	235	605	482	212	482	388	324	362	492
10291	7.693	469.337	18b-glycyrrhetinic acid	[M-H]-	TRUE	469.332	C30H46O4	TRUE	TRUE	TRUE	61.4	83.3	68.7	469.33197:1896 470.33532:320 471.33868:240	243.16608:28 451.30667:9 469.30194:75 469.33865:340	1896	1768	1342	1894	1640	2571	1474	1619	1441	1293	1073	1917	1881	1323	1248	1054	1407	2032	1932	1593	1672	1280	1004
5106	1.851	315.066	Benzoic acid + 2O, O-Hex	[M-H]-	TRUE	315.07	C13H16O9	TRUE	TRUE	TRUE	90.6	77.2	82.4	315.06613:2217 316.06948:340 317.07284:136	101.76681:3 108.0239:59 109.02962:31 121.05611:3 152.00941:167 153.01863:87 161.04243:3 255.23103:15 315.06604:59 315.0936:22	2174	1219	1391	2109	1940	939	985	758	927	1806	1055	2217	1666	1633	1714	1275	2585	1262	484	1391	1881	1362	1615
5519	7.137	329.084	Phenylacetic acid + 2O, O-Hex	[M-H]-	TRUE	329.088	C14H18O9	TRUE	TRUE	TRUE	80.2	60.9	61.2	329.08765:2046 330.091:194 331.09436:291	59.01706:37 85.04758:9 107.02022:9 119.03694:19 123.04311:46 152.00504:19 165.05879:19 167.03212:65 167.05219:28 168.97864:9 181.04271:28 181.06551:28 209.04079:46 269.07397:19 329.08099:28	2112	2339	2136	2339	2196	1484	1447	1382	1235	1080	1321	1816	2046	1314	1695	1638	1676	2050	1634	1752	1357	1210	1354
2762	0.933	118.085	Glycine-Betaine	[M+H]+	TRUE	118.086	C5H11NO2	TRUE	TRUE	TRUE	92.6	83.9	91.8	118.08463:2520 119.08798:499 120.09134:649	58.07188:192 59.07546:74 67.93727:37 118.0853:56 118.10371:37	1521	1834	1896	2111	1979	2520	2835	2949	3449	3073	3040	2578	2476	2660	2569	2918	3349	1856	1887	1972	2243	2457	2034
8903	7.413	261.141	gamma-Glutamylleucine	[M+H]+	TRUE	261.144	C11H20N2O5	TRUE	TRUE	TRUE	87.6	85.6	87.1	261.14294:1518 262.14629:407 263.14965:99	56.06496:3 72.93929:3 84.04482:40 86.09922:56 114.05311:9 130.04723:12 132.10281:28 142.04997:15 152.10738:6 167.12051:3 170.11363:6 198.10815:9 244.11507:9 247.10368:3	371	517	494	532	580	1457	1604	1645	1880	1832	2002	1136	1107	1129	1300	1233	1609	1133	1159	1364	1369	1518	1420
3193	0.896	130.049	Pyroglutamic acid	[M+H]+	TRUE	130.05	C5H7NO3	TRUE	TRUE	TRUE	88.4	72	91	130.04843:7183 131.05178:701 132.05514:372	56.05514:149 69.04168:19 77.04029:19 84.04642:304 85.02885:37 130.06915:56	6368	7183	7623	7820	8420	9265	10464	10066	10493	10738	11245	12455	13950	14148	14227	14710	15270	10875	10691	11708	12105	12505	12578
41674	10.888	763.192	[(2R,3S,4S,5R,6S)-6-[(2S,3R,4R,5R,6S)-2-[5,7-dihydroxy-2-(4-hydroxyphenyl)-4-oxochromen-3-yl]oxy-4,5-dihydroxy-6-methyloxan-3-yl]oxy-3,4,5-trihydroxyoxan-2-yl]methyl (E)-3-(4-hydroxyphenyl)prop-2-enoate	[M+Na]+	TRUE	763.183	C36H36O17	TRUE	TRUE	TRUE	81.1	79.5	77.4	763.17548:2464 764.17883:1252 765.18219:375	673.15417:19 760.85657:38 763.17889:514	1830	2464	3155	4036	3742	63	173	156	74	179	100	80	151	99	161	85	222	121	208	180	109	125	131
15626	10.303	347.074	Skimmin	[M+Na]+	TRUE	347.07	C15H16O8	TRUE	TRUE	TRUE	79.3	62.4	86	347.07437:3073 348.07772:1056 349.08108:151	96.09589:19 114.09042:74 149.05453:19 215.04913:19 255.04088:19 284.02994:19 287.04956:37 289.02832:19 291.10538:19 314.03854:37 323.98904:19 339.26953:37 346.01575:19 347.07468:260 347.0957:56	1889	2583	2765	2571	3073	309	353	233	370	300	169	257	356	295	607	321	436	428	196	419	334	274	437
16137	17.016	353.266	2,3-dihydroxypropyl palmitate	[M+Na]+	TRUE	353.27	C19H38O4	TRUE	TRUE	TRUE	84.5	74.6	85.9	353.26602:705 354.26937:517 355.27273:200	81.07026:8 107.08368:5 133.09923:3 149.13318:11 247.08073:3 266.97339:8 289.08871:8 321.08008:5 353.09549:19 353.17508:125 353.21487:16	6898	6813	7287	6997	7229	840	954	845	906	862	1007	528	464	583	615	553	844	666	538	634	558	575	705
6159	0.913	203.053	Theophylline	[M+Na]+	TRUE	203.05	C7H8N4O2	TRUE	TRUE	TRUE	86.1	75	75	203.05089:14821 204.05424:2250 205.0576:1620	203.0555:56	11886	14061	13747	13261	14959	21528	24643	24696	26087	27794	27762	13591	14600	14271	13753	14081	17771	14961	14821	16484	16187	19289	15706
5728	9.363	193.084	Myristicin	[M+H]+	TRUE	193.086	C11H12O3	TRUE	TRUE	TRUE	90.3	91.4	86.8	193.08553:2011 194.08888:742 195.09224:363	63.02647:3 77.03969:19 79.05731:21 89.04046:11 90.04488:13 91.0536:13 103.05409:19 103.07272:8 105.07138:98 115.05261:53 118.04079:45 118.05766:21 131.04794:16 132.05656:8 133.0088:11 133.06578:77 136.08852:8 137.00723:3 161.05684:27 178.07928:8	1199	1797	1520	1703	1529	2011	2286	2143	2563	2475	2408	1914	2112	2225	2302	2258	2701	2068	2062	2399	2558	2340	2482
37977	10.596	689.202	2-(4-{[(1S,2S)-1,3-dihydroxy-1-(4-hydroxy-3-methoxyphenyl)propan-2-yl]oxy}-3,5-dimethoxyphenyl)-5-hydroxy-4-oxo-4H-1-benzopyran-7-yl beta-D-glucopyranoside	[M+H]+	TRUE	689.211	C33H36O16	TRUE	TRUE	TRUE	78.6	75.6	70.7	689.20862:32148 690.21197:12496 691.21533:4096	124.37542:19 173.03641:19 245.15347:19 287.05054:37 303.12988:19 315.04587:74 315.08093:56 316.06638:37 327.08945:19 329.0683:186 330.68854:42 331.08139:2572 332.0838:37 333.55417:37 440.20206:38 526.45593:41 527.08118:41 527.159:2330 528.15765:37	27044	24100	25000	32148	35826	162	162	210	153	209	210	312	271	237	447	249	167	163	279	257	186	296	251
26433	23.838	495.357	(2alpha,3beta)-2,3-dihydroxyolean-12-en-28-oic acid	[M+Na]+	TRUE	495.35	C30H48O4	TRUE	TRUE	TRUE	85.8	87.3	85.3	495.35657:1974 496.35992:2121 497.36328:648	495.31097:74 495.36127:130 495.39267:56	547	968	773	496	445	1126	1222	1693	1984	2093	2389	1510	1505	2030	2298	2541	2839	1213	1461	1974	2135	2363	2591
3783	12.466	271.058	Naringenin	[M-H]-	TRUE	271.061	C15H12O5	TRUE	TRUE	TRUE	96.2	89.6	92.8	271.06155:10958 272.0649:2421 273.06826:121	59.01668:11 63.02728:56 63.04856:11 65.00574:82 79.9608:7 83.01601:67 93.0351:78 93.06232:11 106.68448:8 107.01566:243 108.02258:11 108.99589:7 110.39581:4 117.03265:11 118.67984:26 119.0507:950 120.05382:30 121.02854:19 125.02521:30 133.02766:11 137.02283:15 143.04704:22 143.05887:11 145.02725:26 149.02335:11 150.52786:15 150.99059:16 151.00272:1257 151.13977:12 151.45573:7 152.0034:41 153.14185…	4066	3725	3798	3488	4288	11255	10914	8534	8542	8989	9297	4546	6995	3107	4016	3265	3726	12339	13192	10542	11865	10958	11190
14093	9.963	330.129	(E)-N-[2-hydroxy-2-(4-hydroxyphenyl)ethyl]-3-(4-hydroxy-3-methoxyphenyl)prop-2-enamide	[M+H]+	TRUE	330.134	C18H19NO5	TRUE	TRUE	TRUE	86.1	85.7	84.2	330.13474:752 331.13809:1386 332.14145:534	145.02655:46 177.05553:74 186.06435:9	528	455	661	884	1008	752	783	803	840	819	793	469	640	630	456	633	503	798	751	747	856	757	744
14029	8.632	329.068	(-)-Epigallocatechin (EGC)	[M+Na]+	TRUE	329.064	C15H14O7	TRUE	TRUE	TRUE	79.8	60.2	75	329.06839:1324 330.07174:222 331.0751:851	77.03674:19 98.98351:37 202.87019:19 329.06625:111	675	891	1020	1324	1123	225	227	267	264	226	203	254	244	194	256	215	200	204	222	268	201	239	265
43624	12.314	802.211	quinolin-8-yl 2,3,6-tri-O-acetyl-4-O-(2,3,4,6-tetra-O-acetyl-beta-D-galactopyranosyl)-1-thio-beta-D-glucopyranoside	[M+Na]+	TRUE	802.2	C35H41NO17S	TRUE	TRUE	TRUE	75	71.2	75	802.22015:1330 803.2235:551 804.22686:182	538.13385:11 801.22235:5 802.22552:387 802.41742:8	849	1165	1472	1507	1330	1847	1936	1825	2526	2586	2308	2604	3227	3518	3667	3339	4566	1935	1866	1941	1388	1076	2547
34947	18.192	631.188	4-(3-Oxobutyl)phenyl 6-O-[(2E)-3-phenyl-2-propenoyl]-2-O-(3,4,5-trihydroxybenzoyl)-beta-D-glucopyranoside	[M+Na]+	TRUE	631.18	C32H32O12	TRUE	TRUE	TRUE	73.8	64.9	74.1	631.18848:6338 632.19183:2983 633.19519:801	155.29562:9 204.07423:9 207.06337:158 237.07507:111 237.09245:37 399.10034:28 429.10318:28 629.15576:28 631.14355:1109	7919	5232	6694	6821	6338	4993	2927	2913	3421	3301	5887	2841	3127	3426	4231	3605	12220	4310	2898	2361	826	519	8620
15655	18.597	347.217	Calycanthine	[M+H]+	TRUE	347.222	C22H26N4	TRUE	TRUE	TRUE	86	75	75	347.22076:2702 348.22411:635 349.22747:315	347.22137:130	2453	2735	3351	3897	4602	2047	2350	2326	2411	2339	1947	1261	1436	1348	1314	1403	1671	2453	2702	3445	2856	2214	1801
23917	23.566	457.147	Catharanthine Sulfate	[M+Na]+	TRUE	457.141	C21H26N2O6S	TRUE	TRUE	TRUE	85.1	88	78.8	457.138:426 458.14135:271 459.14471:372	457.28955:111 457.34689:281	307	334	532	749	389	419	475	325	244	226	254	596	315	279	226	167	173	426	295	377	125	223	235
17955	8.72	375.125	5,7-dihydroxy-3-(4-methoxyphenyl)-6-(3-methylbut-2-enyl)chromen-4-one	[M+Na]+	TRUE	375.12	C21H20O5	TRUE	TRUE	TRUE	85.7	75	75	375.12241:1242 376.12576:431 377.12912:805	375.116:37	605	824	750	1007	1000	938	972	1125	1345	1346	1821	1068	1320	1389	1588	1622	1875	852	978	1242	1277	1311	1268
31720	19.664	579.142	Vitexin 2''-O-p-coumarate	[M+H]+	TRUE	579.15	C30H26O12	TRUE	TRUE	TRUE	74.3	68.7	70.8	579.14215:1406 580.1455:213 581.14886:109	145.09914:5 150.02518:19 184.07269:5 193.04625:14 194.05168:9 297.06424:5 301.14099:42 385.13742:5 579.13904:186 579.38367:9	922	953	965	1011	889	921	931	1140	902	1208	2981	1225	1072	1371	1406	1331	2755	1180	1052	1362	1188	1572	2969
33560	10.333	609.173	Neodiosmin	[M+H]+	TRUE	609.181	C28H32O15	TRUE	TRUE	TRUE	93.5	87.5	89.4	609.1814:1669 610.18475:977 611.18811:488	219.06181:19 286.0603:38 301.06824:527 609.177:37	1964	2175	1625	2106	1988	1594	1471	1547	1637	1669	1705	1353	1908	2525	1961	2135	2401	1675	1683	2652	2900	2921	2895
29535	10.095	545.192	(2R,3R,4S,5S,6R)-2-[3-[2-(4-hydroxy-3-methoxyphenyl)-3-(hydroxymethyl)-7-methoxy-2,3-dihydro-1-benzofuran-5-yl]propoxy]-6-(hydroxymethyl)oxane-3,4,5-triol	[M+Na]+	TRUE	545.199	C26H34O11	TRUE	TRUE	TRUE	82.3	75.8	73.8	545.20081:4178 546.20416:1807 547.20752:871	156.06976:19 185.05933:37 377.09851:19 383.13629:74 515.20447:19 544.703:38 545.20056:565	4246	5737	4178	3905	3065	468	594	636	559	578	567	1000	1053	1022	1055	1028	1196	413	447	546	535	562	650
38581	17.567	701.37	Cimiracemoside D	[M+Na]+	TRUE	701.38	C37H58O11	TRUE	TRUE	TRUE	78.6	75	73.7	701.37329:1461 702.37664:668 703.38:191	701.37262:266	414	421	602	774	815	381	609	857	1006	863	1046	708	1004	842	914	981	1115	569	737	1018	1461	1598	1154
20785	23.575	413.374	(3beta,22E)-stigmasta-5,22-dien-3-ol	[M+H]+	TRUE	413.38	C29H48O	TRUE	TRUE	TRUE	82.2	83	81.4	413.37421:2986 414.37756:495 415.38092:451	93.0688:19 97.06527:37 105.0844:19 395.36636:37 413.26318:93 413.32632:186 413.37509:74	812	2262	2370	2986	2538	2688	2367	3166	2636	2486	3054	2492	2575	2568	3052	2665	2311	3326	3306	3642	2823	3583	3387
9957	6.74	459.123	(-)-Podophyllotoxin	[M+FA-H]-	TRUE	459.13	C22H22O8	TRUE	TRUE	TRUE	89.6	75	75	459.12985:2161 460.1332:859 461.13656:943	459.13293:37	511	624	573	464	463	954	1201	1120	592	642	570	2161	2375	1486	1110	1121	1014	684	816	1114	596	548	483
3421	1.547	136.063	Adenine	[M+H]+	TRUE	136.061	C5H5N5	TRUE	TRUE	TRUE	91	83.9	83.9	136.06017:1487 137.06352:401 138.06688:105	109.06969:19 119.03316:56 136.06042:56	442	502	711	563	687	1678	1864	2102	2189	1898	2073	1362	1445	1714	1603	1489	1487	1603	1592	1923	1907	2110	2018
25666	15.373	483.123	Silydianin	[M+H]+	TRUE	483.13	C25H22O10	TRUE	TRUE	TRUE	90.1	93.2	74.8	483.12466:1229 484.12801:216 485.13137:157	483.10849:9 483.13022:74 483.3226:9	2494	2470	2703	2261	2304	1114	1341	994	1439	1309	923	775	808	1440	1235	617	1638	1229	1185	676	449	217	1254
4295	13.552	285.203	Dimethyl tetradecanedioate	[M-H]-	TRUE	285.207	C16H30O4	TRUE	TRUE	TRUE	85.9	76.6	75.3	285.20627:589 286.20962:111 287.21298:111	125.09233:19 285.20752:56	601	473	589	497	586	671	613	643	623	467	511	303	289	384	494	386	483	321	402	366	359	350	552
12366	15.608	309.204	hexadecanedioic acid	[M+Na]+	TRUE	309.2	C16H30O4	TRUE	TRUE	TRUE	89.6	88	75	309.20331:521 310.20666:186 311.21002:487	309.12228:25	329	275	323	350	335	528	459	515	666	573	521	348	370	421	342	334	360	383	426	476	473	511	407
12873	15.84	315.086	5,7-dihydroxy-6-methoxy-2-(4-methoxyphenyl)-4H-chromen-4-one	[M+H]+	TRUE	315.09	C17H14O6	TRUE	TRUE	TRUE	91.5	80.3	91.7	315.08899:1298 316.09234:442 317.0957:347	147.04146:12 174.10092:6 187.11186:12 272.06467:37 300.06497:118 300.08698:31 315.08774:173 315.198:25	588	653	724	642	597	1338	1458	1732	1683	1647	1452	1177	1394	1235	1297	1270	1256	1298	1405	1443	1407	1595	1208
3283	2.691	132.1	Isoleucine	[M+H]+	TRUE	132.102	C6H13NO2	TRUE	TRUE	TRUE	80.4	63.7	83.9	132.10001:3037 133.10336:363 134.10672:108	53.01812:1 55.93396:4 56.05226:9 57.05965:10 58.06848:4 69.03535:3 69.07171:49 69.68427:3 72.9382:26 77.04993:1 86.09817:49 90.9021:3 105.08247:1	1144	114	1134	1694	822	1707	1316	827	2190	2711	2776	2291	2250	1559	2335	2651	3037	1176	1326	1481	1474	1494	1864
12082	9.889	305.204	atropine methyl bromide	[M+H]+	TRUE	305.2	C18H26NO3+	TRUE	TRUE	TRUE	73.8	75	75	305.21442:763 306.21777:51 307.22113:204	305.21066:37	171	341	290	419	322	571	463	668	593	477	802	530	707	627	772	609	576	747	666	663	714	763	647
29398	9.52	543.172	Brusatol	[M+Na]+	TRUE	543.18	C26H32O11	TRUE	TRUE	TRUE	86.1	75	75	543.18011:1676 544.18346:543 545.18682:348	543.16534:56 543.17523:186	2269	2782	2076	1481	1539	1338	1356	1676	1622	2006	1983	1878	1960	1702	2145	2141	2662	1181	1108	1449	1430	1470	1455
2599	10.731	207.069	Sinapoyl aldehyde	[M-H]-	TRUE	207.066	C11H12O4	TRUE	TRUE	TRUE	84.6	70.7	77.3	207.06761:746 208.07096:230 209.07432:115	77.048:37 93.05512:19 105.05027:19 121.03272:56 143.0482:19 149.01762:56 177.01797:148 177.03676:56 179.76274:19 192.04089:37	317	513	88	430	359	907	929	778	656	835	746	457	398	366	383	360	457	831	737	622	798	763	619
4939	16.928	309.203	FA 18:4+2O	[M-H]-	TRUE	309.207	C18H30O4	TRUE	TRUE	TRUE	85.7	81.5	73.8	309.203:2789 310.20635:396 311.20971:36897	96.95795:186 96.96908:74 247.20659:19 291.20483:37 294.112:19 309.17444:616	2960	3585	3855	3306	3061	3272	2795	2904	3567	2353	2455	3461	3678	2858	2789	3425	3595	3265	3116	2672	2657	2461	2187
20224	1.08	405.015	Uridine 5'-diphosphate	[M+H]+	TRUE	405.009	C9H14N2O12P2	TRUE	TRUE	TRUE	82.1	88	62.4	405.00888:1441 406.01223:756 407.01559:252	97.03439:56	861	1317	998	904	904	927	1062	1248	1140	979	992	838	959	1173	1187	1292	1169	1309	1541	1441	1406	1531	1386
8698	22.417	257.223	5-beta-Androstane-3-alpha,17-beta-diol	[M-2H2O+H]+	TRUE	257.226	C19H32O2	TRUE	TRUE	TRUE	84.2	77.9	79.5	257.22607:9114 258.22942:1452 259.23278:297	55.07373:19 67.0558:37 75.069:19 79.05741:37 81.08715:37 91.0565:37 93.06905:56 93.45483:19 95.08295:74 103.4948:19 105.07029:74 107.10422:37 109.10162:56 117.07098:37 119.08796:56 121.09731:37 121.10042:74 123.11877:37 123.136:19 131.0825:37 131.14554:19 135.1194:74 143.1268:19 145.10089:93 147.11932:37 149.13446:93 155.08452:19 161.12947:93 163.14609:37 167.86923:19 173.12933:37 175.14661:74 18…	5539	6061	6224	3978	5383	6694	7154	8080	7705	9114	9356	9573	9726	10233	10096	10866	11767	5235	5427	5830	6513	6826	6448
11489	10.04	507.107	Syringetin-3-O-glucoside	[M-H]-	TRUE	507.114	C23H24O13	TRUE	TRUE	TRUE	90.8	88.7	87	507.11337:3692 508.11672:2049 509.12008:342	135.02429:19 151.00058:37 230.01717:19 241.01117:37 273.05051:37 287.05353:19 301.03922:56 315.05438:19 327.03598:37 330.03168:37 342.98447:19 344.05438:223 345.05518:74 345.09714:56 349.89615:38 489.17297:19 492.13989:39 507.11237:740	3652	3248	3271	3879	3692	37	60	66	107	115	75	92	94	73	111	88	118	87	110	44	60	42	84
37675	11.863	683.36	methyllycaconitine	[M+H]+	TRUE	683.35	C37H50N2O10	TRUE	TRUE	TRUE	87.7	83.4	75	683.35553:3236 684.35888:1341 685.36224:508	315.08957:9 579.98059:9 681.60278:19 683.25476:29 683.35803:754	3236	3494	4960	5345	4431	79	70	81	96	63	65	56	59	69	99	106	71	92	97	49	53	36	55
3539	0.786	259.018	Mannose 1-phosphate	[M-H]-	TRUE	259.022	C6H13O9P	TRUE	TRUE	TRUE	67	94	78.7	259.02408:1835 260.02743:438 261.03079:292	78.97592:37 96.97108:37	4318	3757	3581	3771	4273	1730	1703	1835	1257	1635	1282	1415	1481	1116	1319	1281	1274	1438	1367	1461	1269	1400	1435
5463	10.427	327.213	(10e,15z)-9,12,13-Trihydroxyoctadeca-10,15-dienoic acid	[M-H]-	TRUE	327.218	C18H32O5	TRUE	TRUE	TRUE	83.9	64.6	82.7	327.21997:2018 328.22332:947 329.22668:431	211.12793:37 211.14023:37 221.11403:19 327.20801:37 327.22586:130	2427	2259	2429	2254	2407	2160	2244	2116	2018	2093	1933	1256	1305	1438	1094	1300	1360	1412	1441	1461	1225	1389	1271
14289	8.867	593.142	Vicenin	[M-H]-	TRUE	593.151	C27H30O15	TRUE	TRUE	TRUE	85	74.3	68.5	593.15314:29445 594.15649:11824 595.15985:2938	59.01639:65 59.03048:28 71.01818:19 85.02832:19 89.02551:102 89.0375:37 99.54686:9 113.02298:19 119.03385:84 119.05079:19 126.0452:9 139.07066:9 147.09605:9 161.05017:19 179.0479:28 179.07623:19 185.03873:9 269.03769:28 282.05151:37 285.05566:9 293.0462:829 293.56348:19 311.04904:65 323.04877:65 325.07123:19 335.06116:46 339.04126:19 341.06879:74 353.06644:46 355.09286:46 365.06921:37 383.07651:1…	31578	29732	31249	30425	29445	247	167	166	263	187	187	350	287	287	388	343	240	310	264	389	148	105	105
5186	16.319	317.207	5-Hepe	[M-H]-	TRUE	317.212	C20H30O3	TRUE	TRUE	TRUE	63.4	95.9	69.5	317.20731:3491 318.21066:556 319.21402:1112	114.94237:6 116.92557:19 317.21002:625	803	773	538	756	661	2127	1650	1354	1177	1397	1173	3491	3190	2387	2108	2462	2500	2002	1699	1527	1282	1405	1836
11172	17.807	293.206	8-[3-oxo-2-[(E)-pent-2-enyl]cyclopenten-1-yl]octanoic acid	[M+H]+	TRUE	293.211	C18H28O3	TRUE	TRUE	TRUE	81	72.9	75.8	293.20755:2127 294.2109:1517 295.21426:1142	131.26012:6 147.13446:6 163.0412:19 275.20193:25 293.211:149	1080	1025	1148	1349	1477	2985	3142	3391	3688	3276	3608	1989	1962	2111	2127	1862	2085	2497	2611	2534	3242	3314	2755
3372	22.234	255.193	1,4,7-Eudesmanetriol	[M-H]-	TRUE	255.197	C15H28O3	TRUE	TRUE	TRUE	61.7	83.5	75.2	255.19257:473674 256.19592:97537 257.19928:16741	58.02836:19 194.42471:19 215.46616:19 219.83888:56 230.01361:19 235.20135:93 237.21657:1052 238.21759:56 241.93312:38 254.4193:554 254.48009:97 255.07936:87 255.12445:280 255.23267:80805 255.474:124 255.50558:804 255.52138:777 255.6387:1624	100100	377787	365389	390128	374865	470607	473674	342762	298069	262476	267682	439399	365563	275945	248037	243896	268160	434420	417772	339956	284689	250695	252912
48000	23.188	939.544	Notoginsenoside Fe	[M+Na]+	TRUE	939.529	C47H80O17	TRUE	TRUE	TRUE	77	60.8	75	939.54401:1567 940.54736:1094 941.55072:1518	522.23816:19 624.10535:19 629.21832:111 854.39801:19 939.5271:74 939.60065:381	1278	2513	2148	1567	1592	1034	897	833	1167	1156	1733	809	1076	1122	1324	1185	1246	562	881	954	1874	1179	958
26149	24.783	491.368	culantraramine	[M+H]+	TRUE	491.36	C32H46N2O2	TRUE	TRUE	TRUE	76.8	75	74.4	491.36719:1192 492.37054:374 493.3739:242	491.37155:56	644	665	603	759	754	882	990	1164	1244	1311	1159	666	852	946	878	940	1109	887	1026	1075	1245	1150	1192
5761	11.897	335.217	(1R,4R,9R,10S,13R,14S)-14-hydroxy-14-(hydroxymethyl)-5,9-dimethyltetracyclo[11.2.1.01,10.04,9]hexadecane-5-carboxylic acid	[M-H]-	TRUE	335.223	C20H32O4	TRUE	TRUE	TRUE	63.8	88	75.8	335.22311:395 336.22646:300 337.22982:0	335.22128:69	235	375	219	263	395	756	637	614	397	733	437	634	956	584	741	675	729	232	298	374	286	405	306
5810	9.807	195.062	Ferulic acid	[M+H]+	TRUE	195.065	C10H10O4	TRUE	TRUE	TRUE	85.6	82.3	88.3	195.06296:1939 196.06631:311 197.06967:224	79.05656:19 89.0397:74 106.05827:37 117.03161:74 123.06114:19 134.04219:56 145.02974:167 149.0623:37 163.03812:19 177.07239:56	484	808	747	1024	873	1576	1623	1585	1919	1939	2321	1019	1116	1301	1069	975	1207	1223	1265	1392	1593	1314	1547
2685	17.92	213.183	Tridecanoic acid	[M-H]-	TRUE	213.186	C13H26O2	TRUE	TRUE	TRUE	64.4	88	79.7	213.18678:734 214.19013:0 215.19349:113	213.17487:19	434	462	690	744	398	310	856	545	464	573	837	403	452	554	410	660	875	734	437	700	451	472	464
14747	10.311	607.157	Diosmetin-7-O-rutinoside	[M-H]-	TRUE	607.167	C28H32O15	TRUE	TRUE	TRUE	90.9	84.5	86.3	607.16492:408 608.16827:99 609.17163:0	191.06018:19 299.05807:56 607.16406:130	540	762	412	413	645	314	525	377	398	389	541	361	408	362	315	465	472	800	831	689	392	586	539
22229	9.164	433.106	Isovitexin	[M+H]+	TRUE	433.113	C21H20O10	TRUE	TRUE	TRUE	85.2	89.9	86.8	433.10602:4363 434.10937:1310 435.11273:493	150.11983:19 215.03046:19 283.06229:204 309.07022:37 313.06839:130 313.10083:56 321.07346:19 323.08734:111 337.06274:56 337.07312:149 343.07556:19 349.07297:56 361.06808:56 361.94836:19 367.12:19 379.08057:74 397.0954:37	3074	3755	4363	5329	5063	2736	3125	3374	3473	3529	4068	3073	3552	3197	3268	3580	4011	3020	3070	3795	4274	4657	3756
25907	22.47	487.362	Meliasenin P	[M+H]+	TRUE	487.37	C31H50O4	TRUE	TRUE	TRUE	82.3	75.2	77.6	487.36197:1364 488.36532:330 489.36868:396	244.19312:9 487.24872:19 487.36713:121	912	726	1178	1072	1036	1099	1037	862	1131	1293	1601	927	963	1307	1259	1183	1341	949	803	1203	1215	1369	1364
29013	10.923	537.341	Alisol B Acetate	[M+Na]+	TRUE	537.35	C32H50O5	TRUE	TRUE	TRUE	71.2	65.1	68.8	537.34106:3231 538.34441:450 539.34777:375	282.04855:37 390.3699:19 468.46848:19 471.79526:37 528.34607:111 537.32898:56 537.34204:319	3192	4295	3231	2441	2123	1605	1120	1033	1080	1150	1080	1839	1702	1499	1105	1866	1831	1500	1197	1208	981	1221	978
685	0.866	89.0259	Lactic acid	[M-H]-	TRUE	89.0244	C3H6O3	TRUE	TRUE	TRUE	62.2	88	66.2	89.02524:3350 90.02859:308 91.03195:77	89.02055:19 89.02321:19 89.02987:19	2429	2369	2607	3435	2167	2478	2043	2845	3378	2759	3350	7594	6405	5915	5435	5271	5416	1905	2147	2641	2095	1211	2001
1910	3.16	163.043	3-Hydroxycinnamic acid	[M-H]-	TRUE	163.04	C9H8O3	TRUE	TRUE	TRUE	92.2	91.8	79.7	163.03934:1525 164.04269:210 165.04605:70	51.03574:3 89.06609:3 91.01608:8 93.03345:27 117.03809:8 119.04691:350 120.05464:8	774	523	555	614	528	1489	1596	1425	1565	1502	1093	878	951	908	814	571	669	1525	1382	1180	1369	1664	846
3499	1.137	138.057	Trigonelline	[M+H]+	TRUE	138.055	C7H7NO2	TRUE	TRUE	TRUE	92.9	84.5	93.1	138.05733:4498 139.06068:929 140.06404:186	53.04114:37 57.06318:19 65.04404:37 67.04916:37 78.0368:74 92.0479:149 94.06582:204 121.05047:19 138.05365:451	3786	4050	3740	4138	4498	662	528	637	645	735	444	366	611	546	522	628	392	418	622	481	524	443	563
19248	18.706	392.247	heteratisine	[M+H]+	TRUE	392.24	C22H33NO5	TRUE	TRUE	TRUE	74.8	63.3	75	392.25061:1011 393.25396:679 394.25732:135	135.23526:9 149.02338:28 392.24298:46 392.28772:28	2719	2304	2487	2492	2466	955	837	852	708	801	987	649	730	640	543	679	805	1011	848	980	1137	1047	1057
20912	25.352	779.445	Saikosaponin a	[M-H]-	TRUE	779.459	C42H68O13	TRUE	TRUE	TRUE	89.5	82.2	75	779.4494:3762 780.45275:2017 781.45611:2507	778.25708:19 779.4624:260 779.53339:93	888	838	646	699	907	541	744	504	649	627	407	720	769	860	681	481	729	4280	3900	4015	3762	3955	4292
4608	5.942	166.083	Phenylalanine	[M+H]+	TRUE	166.086	C9H11NO2	TRUE	TRUE	TRUE	91.5	86.9	86.4	166.08502:4339 167.08837:853 168.09173:152	77.04142:53 77.05257:19 79.05531:34 89.2436:3 91.05688:37 93.07079:59 103.05476:312 107.04904:9 117.05296:3 118.06611:12 119.08517:6 119.79324:16 120.08076:668 120.23859:6 131.04881:9	3973	4795	5142	5098	5371	4270	4961	4981	5325	5144	6007	4757	5368	5813	5529	5627	6504	3879	4339	4510	4995	5588	5115
24658	16.889	468.308	(1S,2R,3R,4S,5R,6S,8R,9S,13S,16S,17R,18S)-11-Ethyl-13-(hydroxymethyl)-4,6,16,18-tetramethoxy-11-azahexacyclo[7.7.2.12,5.01,10.03,8.013,17]nonadecane-8,9-diol	[M+H]+	TRUE	468.3	C25H41NO7	TRUE	TRUE	TRUE	81.6	62.7	75	468.30249:551 469.30584:175 470.3092:140	178.11728:19 468.31094:37	203	214	279	146	284	304	432	455	437	399	420	404	396	434	449	428	447	459	390	574	670	551	524
10494	17.93	476.268	PE(18:2(9Z,12Z)/0:0)	[M-H]-	TRUE	476.276	C23H44NO7P	TRUE	TRUE	TRUE	91.7	94.3	81.1	476.27466:4431 477.27801:438 478.28137:730	196.0377:87 214.04683:25 279.23029:725 476.27103:192	3839	3651	4236	4431	3980	5205	4260	3451	3627	3699	4533	3764	3903	3876	3212	3631	4194	6140	4396	4835	4152	3921	5257
28074	19.318	522.347	LPC 18:1	[M+H]+	TRUE	522.356	C26H52NO7P	TRUE	TRUE	TRUE	82.8	81.5	79.6	522.35382:6611 523.35717:2394 524.36053:608	86.10092:9 104.111:93 109.0994:9 173.05092:9 184.07452:376 184.08984:94 445.27475:19 504.3251:19 504.35046:74 504.38849:37 522.35229:319	4661	5039	5245	5561	5683	5663	5629	5582	6691	6791	6252	4437	4631	5158	5237	5006	6611	5615	5602	5685	4545	4181	6659
11860	17.375	302.305	Dihydrosphingosine	[M+H]+	TRUE	302.31	C18H39NO2	TRUE	TRUE	TRUE	90.3	92.5	90.6	302.30496:13484 303.30831:3200 304.31167:553	57.07296:37 60.04641:118 67.05287:12 67.05865:37 69.06973:12 69.0709:31 81.06857:12 83.08648:25 93.07494:6 95.08752:56 109.10493:37 123.11907:19 240.26776:31 254.28104:105 255.2814:12 266.28366:62 284.29578:248 302.3056:19	7801	7573	7788	7971	7622	18789	20102	19171	19992	12970	8687	18017	18578	16574	16521	15721	7313	14322	13484	16281	16716	9704	7596
34603	1.012	625.187	Peonidin-3,5-O-di-beta-glucoside	[M]+	TRUE	625.176	C28H33O16	TRUE	TRUE	TRUE	77.1	68.3	73.5	625.18811:3204 626.19146:1400 627.19482:1000	463.05643:37 623.22949:19 625.17969:223	518	1335	464	512	953	1991	1627	1843	2013	1897	1408	3306	2603	2492	2984	1895	2088	3158	3204	2785	2577	2329	3103
11030	0.978	291.065	7-hydroxy-3-(4-methoxyphenyl)-4H-chromen-4-one	[M+Na]+	TRUE	291.06	C16H12O4	TRUE	TRUE	TRUE	88.1	78.8	86.3	291.06506:6122 292.06841:2060 293.07177:8491	107.0489:19 115.03655:56 128.07152:37 277.04065:19 291.06598:334	1280	1526	1748	1723	1958	8680	11178	11128	9978	12687	14713	6122	6715	7705	8480	8482	10868	5507	5328	6218	6241	8171	6727
48597	33.574	959.504	Soyasaponin Ba	[M+H]+	TRUE	959.521	C48H78O19	TRUE	TRUE	TRUE	73.3	70.3	74.5	959.50366:5735 960.50701:5767 961.51037:5849	273.22806:19 304.9137:19 335.25204:37 337.26578:37 338.29828:37 481.30933:19 600.49377:37 617.51654:56 618.5166:130 675.21411:19 681.33484:188 795.92358:19 797.50531:37 872.14905:19 909.74561:19 956.54688:56 956.60797:37 959.56586:8944 959.91125:293	7173	15337	7079	5735	2001	627	1358	587	789	694	1007	1014	773	879	899	921	761	800	623	912	1323	898	641
14296	8.901	593.176	isosakuranetin-7-O-rutinoside	[M-H]-	TRUE	593.188	C28H34O14	TRUE	TRUE	TRUE	83.9	61.4	79.4	593.19:26669 594.19335:10196 595.19671:2300	59.01639:65 59.03048:28 71.01818:19 85.02832:19 89.02551:102 89.0375:37 99.54686:9 113.02298:19 119.03385:84 119.05079:19 126.0452:9 139.07066:9 147.09605:9 161.05017:19 179.0479:28 179.07623:19 185.03873:9 269.03769:28 282.05151:37 285.05566:9 293.0462:829 293.56348:19 311.04904:65 323.04877:65 325.07123:19 335.06116:46 339.04126:19 341.06879:74 353.06644:46 355.09286:46 365.06921:37 383.07651:1…	32150	29088	30979	30432	26669	259	127	164	326	186	242	248	287	298	213	126	252	267	307	428	148	133	158
26404	16.722	495.121	Salvianolic acid A	[M+H]+	TRUE	495.13	C26H22O10	TRUE	TRUE	TRUE	75.9	77.9	76.3	495.1207:470 496.12405:147 497.12741:79	477.41162:5 495.12155:37	386	470	343	401	346	204	341	309	317	326	289	306	296	407	288	238	325	280	390	210	322	219	236
2980	1.108	124.037	Nicotinic acid	[M+H]+	TRUE	124.039	C6H5NO2	TRUE	TRUE	TRUE	83.7	90.3	70.3	124.03697:2300 125.04032:415 126.04368:416	52.01839:19 55.93462:19 70.06827:19 78.0398:56 80.04893:74 122.03021:19 124.03739:93	960	1432	1185	807	783	1438	1478	1329	1592	1779	1662	1298	1901	2522	2069	1925	2022	1189	1431	1932	2300	2138	1955
2197	0.875	104.108	Choline	[M]+	TRUE	104.106	C5H14NO	TRUE	TRUE	TRUE	81.8	63.9	72.5	104.10712:69767 105.11047:5946 106.11383:887	56.05473:37 56.06319:37 57.8904:74 58.06343:47 58.06774:2075 59.07671:231 59.90631:56 60.08561:2744 60.10969:106 60.21808:59 60.38249:37 61.98895:37 63.08284:19 69.03671:74 71.07344:56 86.09547:37 88.08319:56 103.05894:39 104.10909:912 104.12349:178	62517	71181	70738	82264	77993	78474	86449	84454	92676	98683	94865	69767	79610	78384	79329	81350	84868	85995	84595	86909	91276	93111	92418
27217	7.734	508.24	Mesaconine	[M+Na]+	TRUE	508.25	C24H39NO9	TRUE	TRUE	TRUE	79.7	75	75	508.24005:11400 509.2434:3725 510.24676:910	508.24509:25	2259	2949	3105	3202	3364	8821	9132	9014	9010	9399	8489	12177	12818	11519	13689	11400	13983	7816	7799	8776	9940	9146	8657
25430	10.512	927.513	ilexoside II	[M-H]-	TRUE	927.495	C47H76O18	TRUE	TRUE	TRUE	84.2	70.7	85.8	927.50616:782 928.50951:900 929.51287:400	134.8654:28 134.89326:46 135.9675:28 135.99054:19 757.35681:9 927.49335:65 927.56213:37	476	647	604	762	645	750	656	986	686	486	800	761	976	840	732	699	760	404	1083	470	600	782	408
44480	9.931	825.136	Atractyloside potassium salt	[M+Na]+	TRUE	825.12	C30H44K2O16S2	TRUE	TRUE	TRUE	67	61.3	62.4	825.1358:1304 826.13915:724 827.14251:484	463.12137:19 487.0213:56 758.63971:19 801.18903:37 825.14575:149 825.20251:74	1739	2238	1599	1528	1304	64	17	34	25	20	39	72	40	12	64	22	21	30	43	18	11	38	23
4736	19.501	301.211	7-ethenyl-1,4a,7-trimethyl-3,4,6,8,8a,9,10,10a-octahydro-2H-phenanthrene-1-carboxylic acid	[M-H]-	TRUE	301.217	C20H30O2	TRUE	TRUE	TRUE	63.1	88	73.3	301.21494:1190 302.21829:0 303.22165:0	301.20535:25	261	558	507	565	706	1719	1542	1042	1156	1190	1005	916	448	449	703	526	716	1490	1843	1780	1777	1679	1964
29534	10.371	545.189	Bruceine A	[M+Na]+	TRUE	545.2	C26H34O11	TRUE	TRUE	TRUE	73.8	75	72.7	545.18945:1012 546.1928:168 547.19616:420	545.20038:74	411	995	835	1012	962	498	369	253	396	291	380	442	400	887	580	775	567	389	266	517	609	216	314
33082	24.077	601.382	Timosaponin A1	[M+Na]+	TRUE	601.37	C33H54O8	TRUE	TRUE	TRUE	83.1	82.9	74.7	601.36945:1630 602.3728:793 603.37616:642	416.25464:37 601.3667:74 601.40131:130 601.44635:56 601.51556:167	11120	10788	9639	12584	12234	1687	1799	1898	2029	2264	2085	1326	1630	2036	2028	1837	1901	1512	1602	2007	1780	1823	1945
29175	19.511	539.32	sodium;(2Z)-2-[(3R,4S,8S,9S,10S,11R,13R,14S,16S)-16-acetyloxy-3,11-dihydroxy-4,8,10,14-tetramethyl-2,3,4,5,6,7,9,11,12,13,15,16-dodecahydro-1H-cyclopenta[a]phenanthren-17-ylidene]-6-methylhept-5-enoate	[M+H]+	TRUE	539.33	C31H47NaO6	TRUE	TRUE	TRUE	76.4	79.7	67	539.3219:1616 540.32525:518 541.32861:170	419.15173:19 521.47729:19 539.32031:320	2164	2296	3041	3449	3671	1079	1171	1306	1616	1767	1777	786	956	1193	1400	1209	2096	1108	1343	1331	1489	1447	2321
25532	23.128	481.241	Ganolactone B	[M+Na]+	TRUE	481.25	C27H38O6	TRUE	TRUE	TRUE	78	69.5	73.4	481.2406:608 482.24395:206 483.24731:206	287.23004:19 481.28998:167 481.36429:37	183	486	299	589	670	708	968	730	996	888	1288	896	808	447	828	705	608	833	861	975	846	1101	923
11846	8.535	517.146	[(2S,3S,4R,5R)-4-hydroxy-2,5-bis(hydroxymethyl)-2-[(2R,3R,4S,5S,6R)-3,4,5-trihydroxy-6-(hydroxymethyl)oxan-2-yl]oxyoxolan-3-yl] (E)-3-(4-hydroxy-3-methoxyphenyl)prop-2-enoate	[M-H]-	TRUE	517.156	C22H30O14	TRUE	TRUE	TRUE	63.9	66.5	84.6	517.15436:1580 518.15771:360 519.16107:180	89.02029:9 151.05605:9 173.06268:9 175.03644:74 175.05885:28 193.05086:111 218.99338:9 235.05971:37 247.06094:9 265.08386:19 289.08218:9 295.07385:19 337.08643:19 517.13745:46 517.15991:204 517.28833:19	1668	1403	1760	1770	1580	347	437	455	339	247	441	565	531	640	466	345	437	623	423	580	506	392	426
7162	8.372	225.076	Sinapinic acid	[M+H]+	TRUE	225.08	C11H12O5	TRUE	TRUE	TRUE	83.6	80.1	83.8	225.07555:4689 226.0789:689 227.08226:216	81.07387:31 85.02914:50 87.03354:6 91.05447:136 105.07087:12 106.03669:6 117.02873:12 118.04025:50 119.04842:223 121.02791:19 123.11141:37 126.9641:6 129.03534:56 129.05138:12 132.02193:43 133.02612:19 134.03905:12 136.05005:37 145.02641:12 146.03447:37 147.04088:217 149.02101:87 162.03038:19 163.03812:12 164.04536:68 174.03137:31 175.0365:161 177.01973:25 179.06891:31 189.13045:6 190.99663:19 19…	3460	4057	4253	4689	4414	1490	1591	1526	1625	1539	1999	1475	1729	1677	1619	1658	1554	1924	1909	2153	2479	2374	2244
884	0.834	102.054	DL-3-Aminoisobutyric acid	[M-H]-	TRUE	102.056	C4H9NO2	TRUE	TRUE	TRUE	63.2	88	72.4	102.05514:1311 103.05849:324 104.06185:108	102.06342:19 102.07768:19	1186	877	931	1311	1347	693	508	514	540	468	568	585	617	557	570	543	717	735	858	712	431	580	651
19372	9.797	739.194	Kaempferol-3-O-robinoside-7-O-rhamnoside	[M-H]-	TRUE	739.209	C33H40O19	TRUE	TRUE	TRUE	82.8	64.8	86	739.19739:1312 740.20074:566 741.2041:376	341.077:19 413.08151:56 492.63412:19 593.14642:56 679.47656:37 684.33795:19 736.86707:38 739.18298:357	1312	1356	1157	1486	986	67	61	48	85	29	76	45	84	101	89	83	65	76	32	66	141	43	98
34403	10.369	621.387	(2S,3R,4S,5R)-2-[[(1S,2R,3S,4R,7R,9S,12R,14S,17R,18R,19R,21R,22S)-2-hydroxy-22-(2-hydroxypropan-2-yl)-3,8,8,17,19-pentamethyl-23,24-dioxaheptacyclo[19.2.1.01,18.03,17.04,14.07,12.012,14]tetracosan-9-yl]oxy]oxane-3,4,5-triol	[M+H]+	TRUE	621.4	C35H56O9	TRUE	TRUE	TRUE	76.8	67.4	75	621.38745:1778 622.3908:533 623.39416:152	619.4444:19 621.37109:169	89	60	174	177	253	129	147	299	468	570	1778	222	213	298	247	629	1099	213	98	118	328	607	1500
40581	10.947	741.235	Apigenin-7-O-(2G-rhamnosyl)gentiobioside	[M+H]+	TRUE	741.22	C33H40O19	TRUE	TRUE	TRUE	90.5	84.4	84.4	741.22516:1661 742.22851:924 743.23187:426	741.24341:111	43707	51598	61522	67251	67923	1681	2386	2194	1954	2517	1788	1667	2297	1776	2046	2239	1661	1892	1842	3060	2439	2162	2040
36320	20.74	657.403	hederagenin 28-O-beta-D-glucopyranosyl ester	[M+Na]+	TRUE	657.39	C36H58O9	TRUE	TRUE	TRUE	69.1	64.5	69.9	657.40338:984 658.40673:400 659.41009:586	593.23157:6 599.37378:25 657.41223:173	1020	959	984	913	847	212	226	215	225	230	249	238	231	222	270	301	326	277	240	285	315	298	200
5130	22.866	179.067	3-Methoxycinnamic acid	[M+H]+	TRUE	179.07	C10H10O3	TRUE	TRUE	TRUE	75.1	70.6	64.9	179.06659:1585 180.06994:276 181.0733:92	118.03479:37 118.04246:74 133.06296:111 137.94615:19 161.05966:74	135	128	156	157	172	494	314	389	422	859	1585	501	231	317	181	387	137	419	260	352	334	240	571
16391	15.921	356.188	D-Tetrahydropalmatine	[M+H]+	TRUE	356.18	C21H25NO4	TRUE	TRUE	TRUE	78.3	63.6	75	356.18762:924 357.19097:740 358.19433:261	148.04791:19 159.11914:9 251.88411:9 356.19174:102	258	246	348	333	375	762	842	812	924	900	990	765	1203	634	868	870	883	792	869	760	814	1049	973
29919	12.037	551.248	Ganoderenic acid E	[M+Na]+	TRUE	551.26	C30H40O8	TRUE	TRUE	TRUE	75.7	66.3	75	551.24817:735 552.25152:251 553.25488:156	133.56834:6 309.11136:6 533.28668:6 551.23944:81	624	665	683	735	585	104	126	108	133	148	161	90	109	95	129	126	119	112	108	152	141	143	123
22675	24.146	829.514	Ginsenoside Rg3(S-FORM)	[M+FA-H]-	TRUE	829.495	C42H72O13	TRUE	TRUE	TRUE	83.1	90.4	74.4	829.51404:681238 830.51739:437856 831.52075:187952	80.96677:74 88.13024:19 120.95989:19 125.0216:37 146.98061:19 148.98943:74 152.98338:56 153.38167:19 161.06169:37 164.98114:130 200.65331:19 206.99841:93 225.00595:651 243.01578:37 255.23608:19 271.38043:19 277.21487:56 354.46368:19 391.21375:37 533.32336:19 549.52673:19 551.27838:187 555.7179:19 558.09607:38 559.26031:639 566.52002:19 666.55847:19 671.46857:74 766.51807:223 783.47607:56 789.0761…	681238	626098	627316	629372	620993	7453	7294	7007	6815	7425	7335	7960	7736	6820	9771	7864	8800	7069	7618	9925	9484	11057	9325
41676	16.175	763.227	clitorin	[M+Na]+	TRUE	763.21	C33H40O19	TRUE	TRUE	TRUE	76.6	65.1	75	763.22473:643 764.22808:406 765.23144:312	161.05833:9 190.02148:9 385.13419:28 599.19464:28 709.36786:9 761.5238:9 763.21533:65 763.24261:84 763.29327:28	179	165	148	252	231	673	592	670	750	826	789	581	521	557	731	642	746	506	561	596	589	536	643
33574	23.944	609.267	Isoreserpin	[M+H]+	TRUE	609.281	C33H40N2O9	TRUE	TRUE	TRUE	75.5	61.6	75	609.26898:1137 610.27233:297 611.27569:111	556.46356:19 609.26367:149 609.38214:37	1141	1016	1137	1296	1205	133	174	173	161	180	118	142	184	212	114	104	109	172	195	182	226	332	202
35607	24.125	643.245	(S)-6-((7-acetamido-1,2,3-trimethoxy-9-oxo-5,6,7,9-tetrahydrobenzo[a]heptalen-10-yl)amino)-N-(4-hydroxyphenethyl)hexanamide	[M+Na]+	TRUE	643.26	C33H40N4O6S	TRUE	TRUE	TRUE	81.2	67	75	643.25287:12075 644.25622:5218 645.25958:1179	564.34387:19 621.26343:74 621.29163:39 641.60443:40 643.25012:1470 643.52222:74	11503	14434	12779	13060	12075	63	42	28	30	67	10	62	178	50	66	41	27	39	37	99	27	79	13
32425	18.166	591.146	Mulberroside A	[M+Na]+	TRUE	591.16	C26H32O14	TRUE	TRUE	TRUE	79.1	79.9	77.5	591.15143:777 592.15478:293 593.15814:45	133.08839:8 159.12071:3 163.03857:27 205.09253:3 207.06209:11 313.27115:11 318.63535:3 332.05722:3 335.25177:8 591.14398:111 591.35333:24	918	798	888	976	864	777	479	505	671	715	1119	465	493	718	711	624	2313	704	458	458	203	154	1720
2141	10.702	177.06	Coniferyl aldehyde	[M-H]-	TRUE	177.056	C10H10O3	TRUE	TRUE	TRUE	89.1	97	70.3	177.05997:1267 178.06332:0 179.06668:194	134.03677:74 162.02782:167	474	474	325	428	455	1036	1057	1186	943	1267	919	556	458	578	320	786	556	1020	953	767	670	1022	1000
33319	13.297	605.195	Naringin dihydrochalcone	[M+Na]+	TRUE	605.18	C27H34O14	TRUE	TRUE	TRUE	78.1	65	75	605.18994:679 606.19329:62 607.19665:279	232.07098:19 379.84613:9 605.19568:56 605.22345:28	250	241	349	334	422	561	596	679	724	724	823	537	571	671	675	658	1059	703	664	646	757	694	847
8211	7.573	401.171	(E)-4-[(1S,3R,4S,6S)-3-hydroxy-2,2,6-trimethyl-6-[(2S,3R,4S,5S,6R)-3,4,5-trihydroxy-6-(hydroxymethyl)oxan-2-yl]oxy-7-oxabicyclo[2.2.1]heptan-1-yl]but-3-en-2-one	[M-H]-	TRUE	401.18	C19H30O9	TRUE	TRUE	TRUE	89.8	75.2	86.4	401.17969:2341 402.18304:480 403.1864:192	59.0175:19 89.02641:23 99.03432:5 101.02467:14 110.6638:5 113.02663:19 119.0329:19 136.01707:5 161.04663:9 177.1284:14 221.11794:19 239.12286:37 239.15343:14 338.08786:5 401.17953:402	2698	2341	2190	2009	2467	494	333	287	384	250	324	816	597	618	496	498	569	223	172	235	307	268	278
20629	8.497	411.189	4-[4-hydroxy-2,6,6-trimethyl-3-[(2R,3R,4S,5S,6R)-3,4,5-trihydroxy-6-(hydroxymethyl)oxan-2-yl]oxycyclohexen-1-yl]butan-2-one	[M+Na]+	TRUE	411.199	C19H32O8	TRUE	TRUE	TRUE	81.3	77.6	75.8	411.20123:895 412.20458:518 413.20794:239	375.03326:19 411.19562:130	895	904	856	771	804	242	276	317	323	323	396	213	225	364	305	247	353	264	199	326	293	312	307
3592	7.722	261.128	9-(2,3-dihydroxypropoxy)-9-oxononanoic acid	[M-H]-	TRUE	261.134	C12H22O6	TRUE	TRUE	TRUE	64.7	78.8	82.6	261.13336:276 262.13671:82 263.14007:82	97.0723:6 116.01788:6 125.09299:12 125.09772:43 125.1151:12 179.20532:6 187.09756:49	265	331	330	400	218	704	348	334	496	388	356	343	449	309	276	375	292	340	431	353	278	538	238
26584	25.542	973.525	Madecassoside	[M-H]-	TRUE	973.501	C48H78O20	TRUE	TRUE	TRUE	85	90.6	87.4	973.5238:31776 974.52715:16110 975.53051:5128	277.21454:31 278.22125:19 331.21414:6 397.13071:31 415.13177:12 657.349:49 659.35529:25 675.35065:37 892.46844:6 913.59015:25 913.63281:12 935.61499:43 936.44409:6 937.58472:37 970.42322:25 970.49799:19 973.47699:19 973.55627:4402 973.8866:131	32785	25788	30181	26757	31776	1372	1528	1619	1732	1882	1699	1650	1382	1761	2064	1173	1219	2154	2013	2217	2457	1645	1852
33562	8.751	609.175	amarogentin	[M+Na]+	TRUE	609.16	C29H30O13	TRUE	TRUE	TRUE	83.4	75	75	609.16748:1060 610.17083:551 611.17419:348	609.17871:84	729	1186	1099	1538	1262	1086	1445	1590	1840	1838	2878	1555	1964	2493	2538	3600	3731	662	631	1060	862	1075	1202
25357	7.276	479.172	Lindleyin	[M+H]+	TRUE	479.16	C23H26O11	TRUE	TRUE	TRUE	86.7	85.9	87.8	479.1694:898 480.17275:482 481.17611:176	479.17722:186 479.21429:37	251	346	362	573	536	898	851	834	1112	1061	1010	1579	2100	2574	2717	2390	3590	522	519	610	452	294	807
15726	5.828	348.166	Methyl N-(2,6-dimethylphenyl)-N-(phenylacetyl)alaninate	[M+Na]+	TRUE	348.157	C20H23NO3	TRUE	TRUE	TRUE	80.1	80.1	77.2	348.16312:2861 349.16647:691 350.16983:306	69.03326:6 348.20944:12	2014	2733	2651	2792	2769	2568	2861	3132	3111	3490	3279	2942	3048	3637	4051	3731	4233	2624	2867	3408	3328	3593	4256
48921	24.513	969.565	Ginsenoside Re	[M+Na]+	TRUE	969.54	C48H82O18	TRUE	TRUE	TRUE	78.4	71.8	75	969.55933:5299 970.56268:3004 971.56604:1727	969.41754:37 969.57135:606 969.76917:24	2185	2971	2749	2578	2626	4736	4147	4984	5567	6154	6168	2662	4087	3572	4199	3873	4721	4104	3989	5299	6414	5719	6810
37364	23.127	677.598	(3S,10R,13R)-10,13-dimethyl-17-octyl-2,3,4,7,8,9,10,11,12,13,14,15,16,17-tetradecahydro-1H-cyclopenta[a]phenanthren-3-yl hexadecyl carbonate	[M+Na]+	TRUE	677.58	C44H78O3	TRUE	TRUE	TRUE	69.5	60.6	85.9	677.59772:647 678.60107:1088 679.60443:605	536.47266:28 633.25873:9 677.4162:28 677.4787:84 677.58154:28	375	375	261	202	373	292	298	647	358	249	280	174	561	242	186	338	336	285	250	114	152	167	265
48107	19.664	943.385	[(7S,9E,11S,12R,13S,14S,15S,16R,17S,18S,19E,21Z)-2,15,17-trihydroxy-11-methoxy-3,7,12,14,16,18,22-heptamethyl-26-[4-(2-methylquinolin-4-yl)piperazin-1-yl]-6,23,27,29-tetraoxo-8,30-dioxa-24-azatetracyclo[23.3.1.14,7.05,28]triaconta-1(28),2,4,9,19,21,25-heptaen-13-yl] acetate	[M+Na]+	TRUE	943.41	C51H60N4O12	TRUE	TRUE	TRUE	65.1	61.9	73	943.38513:698 944.38848:192 945.39184:341	147.00012:9 368.89151:19 780.55432:19 943.34009:19 943.40076:186 943.51349:19	30	25	41	73	92	77	104	271	395	466	444	104	360	642	605	591	513	108	153	312	668	698	470
41132	14.398	753.25	(S)-N-(10-((6-(6-bromo-3,4-dihydro-1H-pyrido[4,3-b]indol-2(5H)-yl)-6-oxohexyl)amino)-1,2,3-trimethoxy-9-oxo-5,6,7,9-tetrahydrobenzo[a]heptalen-7-yl)acetamide	[M+Na]+	TRUE	753.23	C38H43BrN4O6	TRUE	TRUE	TRUE	74.7	60.3	75	753.24493:400 754.24828:295 755.25164:192	139.04283:9 744.95673:19 751.58246:9 753.24738:121	336	390	527	524	512	463	472	572	581	493	542	357	400	507	446	474	581	368	387	468	455	370	426
29167	18.407	539.304	Oleaside A	[M+Na]+	TRUE	539.29	C30H44O7	TRUE	TRUE	TRUE	75.1	89.6	68.3	539.3042:1064 540.30755:140 541.31091:134	400.83942:19 539.31195:223	709	726	988	777	1064	148	212	152	166	195	162	161	55	143	144	86	180	311	186	128	215	245	217
4060	21.191	281.241	Oleic acid	[M-H]-	TRUE	281.249	C18H34O2	TRUE	TRUE	TRUE	60.6	74.9	77.1	281.25003:4005 282.25338:705 283.25674:1128	71.0154:9 144.05673:9 149.00964:28 173.06729:19 191.05891:19 237.98778:28 281.22485:37 281.23669:364	2073	2409	2605	2125	2486	4497	4640	4005	3043	2740	3751	5023	3577	2386	2491	2460	2226	5264	4353	3325	3166	2531	2338
6462	17.386	353.196	19S-Methoxytubotaiwine	[M-H]-	TRUE	353.187	C21H26N2O3	TRUE	TRUE	TRUE	82.9	75	71.8	353.19324:1717 354.19659:251 355.19995:125	353.19751:241	2203	2006	2294	2110	2302	1890	1589	2041	1754	1956	1947	1806	2191	1893	1868	1717	1818	2652	1801	1560	1677	1252	1706
23263	24.086	845.513	Ginsenoside-Rg1	[M+FA-H]-	TRUE	845.49	C42H72O14	TRUE	TRUE	TRUE	82.3	70.5	75	845.50958:24920 846.51293:15963 847.51629:5550	153.01131:37 241.0038:93 260.78537:19 269.23825:37 269.28458:19 277.2052:37 277.21225:56 295.04443:19 315.07129:19 405.22995:56 405.23566:74 521.06793:19 567.27075:37 567.2876:93 575.23199:37 737.10449:19 743.5293:56 753.50348:19 769.58557:37 842.77966:56 843.35748:42 845.51898:5855 845.81036:164	68579	62950	62650	59259	57806	20370	21458	18237	20420	19522	20196	24238	22605	20676	23985	25471	24695	26508	24920	30895	28977	33005	25588
12203	0.976	307.042	Oroxylin A	[M+Na]+	TRUE	307.05	C16H12O5	TRUE	TRUE	TRUE	85.8	79.7	88	307.04163:17941 308.04498:4616 309.04834:6375	186.96536:19 307.11179:56	7769	9976	11072	11322	11350	13823	16335	16999	15636	17212	18725	12200	15161	16376	18284	17637	19660	15630	16342	17941	18506	20612	19906
44561	11.598	827.273	[(7S,9E,11S,12R,13S,14R,15R,16R,17S,18S,19E,21Z)-30-fluoro-15,17,32,37-tetrahydroxy-11-methoxy-3,7,12,14,16,18,22-heptamethyl-2,23-dioxo-8,27,38-trioxa-24,34-diazahexacyclo[23.11.1.14,7.05,36.026,35.028,33]octatriaconta-1(37),3,5(36),9,19,21,25,28,30,32,34-undecaen-13-yl] acetate	[M+Na]+	TRUE	827.25	C43H49FN2O12	TRUE	TRUE	TRUE	71.7	68.9	69.6	827.26508:4738 828.26843:1411 829.27179:1900	229.11554:9 398.28296:9 407.09473:28 409.10788:56 409.13071:19 411.146:19 629.04077:9 805.08966:19 827.18689:29 827.26404:1213	3515	4738	5649	7717	7750	279	312	333	286	377	316	306	361	450	380	352	364	310	383	490	458	504	416
9656	7.364	449.096	3,5-dihydroxy-2-(4-hydroxyphenyl)-7-[3,4,5-trihydroxy-6-(hydroxymethyl)oxan-2-yl]oxy-2,3-dihydrochromen-4-one	[M-H]-	TRUE	449.109	C21H22O11	TRUE	TRUE	TRUE	61.4	66.5	85	449.10364:957 450.10699:80 451.11035:160	61.99033:6 125.02045:19 179.03264:19 238.09683:6 259.04971:25 259.0611:80 261.98389:6 269.04889:49 283.05942:6 287.05325:43 287.07718:12 421.1145:6 449.09747:25	1109	963	947	696	957	186	196	188	153	224	133	149	99	130	174	177	106	195	231	249	159	73	106
14608	23.257	335.166	Strychnine	[M+H]+	TRUE	335.175	C21H22N2O2	TRUE	TRUE	TRUE	78.9	66.1	75	335.1676:1819 336.17095:427 337.17431:2013	264.07974:19 335.16428:111	2006	2614	2877	3661	3746	6250	4533	3668	2789	1819	1440	4787	3395	2831	2004	1469	1307	5208	4048	3597	2349	2052	1525
40946	16.849	749.211	Vaccarin	[M+Na]+	TRUE	749.19	C32H38O19	TRUE	TRUE	TRUE	69.5	64	75	749.21228:8917 750.21563:4047 751.21899:1711	137.05971:9 179.09006:9 185.0571:28 191.06924:19 193.10184:19 215.06752:158 222.28525:9 230.08221:19 277.07217:19 282.08749:9 365.10098:74 371.1131:111 378.10419:56 391.86279:19 393.09601:237 394.09854:19 557.18085:9 585.1853:28 696.88922:9 747.30627:19 749.09778:29 749.22137:1107	2548	2528	3075	3295	3337	6455	6917	8142	8049	9972	8772	8400	8779	8917	8784	9958	8818	7554	7722	9444	11431	9969	8852
24979	21.434	473.346	Hederagenic acid	[M+H]+	TRUE	473.36	C30H48O4	TRUE	TRUE	TRUE	74.4	73.9	75	473.34631:608 474.34966:348 475.35302:300	183.48645:5 473.26193:14 473.34793:79	381	421	499	551	500	597	503	799	767	689	635	497	441	538	550	540	697	608	447	576	586	607	731
27219	21.909	508.275	deltaline	[M+H]+	TRUE	508.29	C27H41NO8	TRUE	TRUE	TRUE	78.3	75	75	508.27887:1069 509.28222:548 510.28558:154	508.27148:180	1514	1728	1680	1659	1473	1000	915	1019	1213	1929	7009	2305	851	1076	1039	1069	1377	1193	1041	1838	941	1427	1477
20495	8.378	409.108	Pteryxin	[M+Na]+	TRUE	409.12	C21H22O7	TRUE	TRUE	TRUE	70.9	74.3	74	409.10791:1678 410.11126:424 411.11462:690	171.94595:9 409.10092:19 409.12662:28 409.18372:272	1201	1494	1474	1536	1678	377	474	459	468	539	600	474	573	502	538	582	605	594	673	841	746	836	808
34941	18.173	631.141	5-hydroxy-2-(3-hydroxy-4-methoxyphenyl)-7-(((2S,3R,4R,5R,6S)-3,4,5-trihydroxy-6-((((2R,3R,4S,5S,6R)-3,4,5-trihydroxy-6-methyltetrahydro-2H-pyran-2-yl)oxy)methyl)tetrahydro-2H-pyran-2-yl)oxy)-4H-chrome n-4-one	[M+Na]+	TRUE	631.16	C28H32O15	TRUE	TRUE	TRUE	73.4	64	75	631.14496:12614 632.14831:4861 633.15167:1172	177.11433:9 207.06494:223 219.05101:19 237.07523:167 399.10995:28 422.98074:9 429.11377:46 429.15469:28 511.32703:9 627.85669:9 629.15894:37 631.14325:1549 631.54761:19	12958	11860	11857	9253	8764	7212	4969	4525	5047	6044	8964	4711	4612	5589	6724	5605	19896	6434	4395	3639	1393	1145	12614
18532	15.027	383.151	Eupalinilide B	[M+Na]+	TRUE	383.14	C20H24O6	TRUE	TRUE	TRUE	78.8	75	75	383.15057:629 384.15392:157 385.15728:396	383.15457:37	604	605	571	629	596	822	994	1037	1104	1279	1010	1070	1120	991	1237	941	1017	1049	987	1315	1513	1342	1261
11152	0.895	293.109	Benzyl glucopyranoside	[M+Na]+	TRUE	293.1	C13H18O6	TRUE	TRUE	TRUE	89.8	83.5	88	293.10526:2782 294.10861:567 295.11197:81	144.03073:37 293.08661:186 293.10593:74	1977	2334	2656	3306	3578	2595	3396	3148	2852	3630	3504	2352	2268	2138	2432	2467	2782	1656	1745	2089	2097	2529	1991
1457	6.092	137.027	Protocatechualdehyde	[M-H]-	TRUE	137.023	C7H6O3	TRUE	TRUE	TRUE	83	70.4	67.6	137.02386:3888 138.02721:725 139.03057:132	65.04493:56 92.74935:19 93.03502:731 137.02168:31	4095	4123	3974	3888	4075	172	253	157	202	211	180	343	322	248	236	83	178	267	241	189	88	188	85
21644	21.836	425.217	Gamabufotalin	[M+Na]+	TRUE	425.23	C24H34O5	TRUE	TRUE	TRUE	64.5	65	69.9	425.21616:3073 426.21951:672 427.22287:315	89.06765:37 110.58415:19 128.05716:19 160.09529:19 240.14912:37 255.22899:19 325.11938:19 365.19077:56 365.21774:37 423.87915:19 425.21701:149 425.24319:56	2699	3076	3149	3170	3073	4013	2950	3140	3045	3078	3181	3167	3064	3129	3325	3436	3862	3409	2954	3115	3188	3242	3672
25546	23.186	481.336	brassinolide	[M+H]+	TRUE	481.35	C28H48O6	TRUE	TRUE	TRUE	72.2	88	73.5	481.33554:1029 482.33889:530 483.34225:318	481.33948:37	754	761	1029	899	676	1249	1527	1770	1819	2028	2088	1217	1469	1219	1276	1802	1475	1097	1554	1784	2328	2796	2191
15942	0.973	351.109	Decursinol angelate	[M+Na]+	TRUE	351.12	C19H20O5	TRUE	TRUE	TRUE	86.1	87.6	87	351.12418:1882 352.12753:560 353.13089:12544	351.12769:56	2183	2644	2825	2804	2909	1360	6901	3812	1715	7410	7193	3135	4626	6499	1882	1743	1810	6200	2939	4259	7078	8140	1727
13737	16.954	325.176	quinine	[M+H]+	TRUE	325.186	C20H24N2O2	TRUE	TRUE	TRUE	75.3	61.9	75	325.17618:840 326.17953:313 327.18289:201	55.05716:6 129.09879:6 182.85736:6 207.16805:6 325.17972:50	355	400	424	474	507	752	765	653	758	748	739	868	978	871	818	714	840	703	803	656	882	797	712
22151	23.89	815.505	Ginsenoside F3	[M+FA-H]-	TRUE	815.48	C41H70O13	TRUE	TRUE	TRUE	85.8	72.1	72.8	815.49158:99714 816.49493:57167 817.49829:27339	122.98477:19 138.97041:19 157.04483:19 175.89427:19 225.01173:130 255.22911:111 272.42072:19 277.21729:167 278.21692:93 280.23578:19 411.37311:37 481.32837:19 519.89886:19 535.90527:19 537.27521:56 559.25122:130 623.29309:19 657.44586:37 727.50922:19 739.25494:19 740.51422:148 740.56415:97 741.53235:1091 759.38367:19 765.52972:37 769.47113:37 783.56317:56 812.88312:171 813.47882:56 814.51373:56 8…	6370413	6464741	6555952	6391036	6370262	51928	58161	45678	46520	45074	45791	58037	52704	48564	54657	55752	53664	99714	94338	110339	109923	108242	89333
20046	16.982	755.228	Cyanidin 3-(2G-glucosylrutinoside)	[M-2H]-	TRUE	755.203	C33H41O20	TRUE	TRUE	TRUE	80.4	64.3	75	755.22101:621 756.22436:248 757.22772:0	163.04274:37 299.90381:19 755.23517:93	197	162	273	126	123	458	423	270	357	479	390	506	465	386	359	645	472	496	405	453	621	330	266
11158	7.462	293.16	Phenylbutyrylglutamine	[M+H]+	TRUE	293.151	C15H20N2O4	TRUE	TRUE	TRUE	70.8	69.6	70.6	293.16016:1070 294.16351:366 295.16687:383	84.96273:6 113.0908:6 119.04848:37 121.02799:6 146.02612:6 147.04277:99 149.02119:12 178.04315:6 208.9695:12 275.1488:12 293.16098:25	245	243	241	274	298	521	547	652	673	649	630	287	379	360	389	371	443	847	908	895	1070	1055	1009
31324	7.71	573.251	convallatoxin	[M+Na]+	TRUE	573.27	C29H42O10	TRUE	TRUE	TRUE	75.6	69.6	75	573.25665:543 574.26:261 575.26336:71	411.189:12 573.23712:31 573.25061:80	198	408	543	615	772	39	51	72	67	59	66	27	67	67	80	62	74	46	68	46	84	53	35
16098	0.966	353.082	2-(2,3-dihydrobenzo[b][1,4]dioxin-6-yl)-3H-benzo[f]chromen-3-one	[M+Na]+	TRUE	353.07	C21H14O4	TRUE	TRUE	TRUE	68.3	65.8	72.3	353.08157:7902 354.08492:1911 355.08828:1701	145.06372:19 353.08496:56	3969	4879	4572	5062	5112	5214	5846	7041	6479	5905	7014	7545	7797	7902	9431	8600	9278	7408	7624	8663	8978	10575	8553
15958	12.996	351.212	Vinpocetine	[M+H]+	TRUE	351.2	C22H26N2O2	TRUE	TRUE	TRUE	72.3	65	75	351.21304:595 352.21639:125 353.21975:45	169.02824:9 351.2189:28	281	379	440	595	553	648	631	763	731	879	915	439	458	547	562	538	589	503	532	571	578	644	696
25535	23.088	481.289	Emetine	[M+H]+	TRUE	481.306	C29H40N2O4	TRUE	TRUE	TRUE	76.7	70.1	75	481.2952:1900 482.29855:640 483.30191:321	354.13419:19 407.21039:19 481.28265:319 481.33841:111	428	659	338	993	894	1481	1932	1960	2483	2085	2987	1866	1658	1453	1900	2190	1834	1573	1814	2056	2602	3399	2205
42445	17.071	779.227	3-[(2S,4S,6R)-6-[[(2R,3R,4R,5S,6S)-3,5-dihydroxy-6-methyl-4-[(2S,3R,4S,5S,6R)-3,4,5-trihydroxy-6-(hydroxymethyl)oxan-2-yl]oxyoxan-2-yl]oxymethyl]-3,4,5-trihydroxyoxan-2-yl]oxy-5,7-dihydroxy-2-(4-hydroxyphenyl)chromen-4-one	[M+Na]+	TRUE	779.199	C33H40O20	TRUE	TRUE	TRUE	67.2	63.6	77.6	779.21857:1387 780.22192:720 781.22528:216	215.06183:25 391.12369:6 393.09982:37 395.11179:12 423.09241:12 423.10403:37 777.11481:13 779.22137:194	286	256	316	352	405	1071	1141	1373	1387	1209	1411	1456	1454	1446	1611	1588	1408	1054	1216	1431	1723	1665	1483
11149	0.971	293.059	Cardamonin	[M+Na]+	TRUE	293.07	C16H14O4	TRUE	TRUE	TRUE	79.4	68.5	75	293.06192:4096 294.06527:622 295.06863:1202	129.01073:19 196.87526:19 293.07733:74	3249	3727	4058	4165	4653	3403	4096	4357	3765	4553	4713	4501	4997	5030	5470	4789	5643	3455	4303	4392	4017	4387	4340
35692	1.011	645.156	5-hydroxy-6-methoxy-2-(4-methoxyphenyl)-7-(((2S,3R,4S,5S,6R)-3,4,5-trihydroxy-6-((((2R,3R,4R,5R,6S)-3,4,5-trihydroxy-6-methyltetrahydro-2H-pyran-2-yl)oxy)methyl)tetrahydro-2H-pyran-2-yl)oxy)-4H-chrome n-4-one	[M+Na]+	TRUE	645.18	C29H34O15	TRUE	TRUE	TRUE	79.9	82.5	87.2	645.16229:5749 646.16564:1287 647.169:858	528.95184:19 543.16101:37 644.73346:38 645.15289:766	5749	5530	4821	6696	7318	3849	3904	3884	4138	3326	4347	4911	4007	4827	4808	3788	5005	3751	3871	3831	4556	3857	4140
49299	22.469	983.558	11-Oxomogroside IIIE	[M+Na]+	TRUE	983.52	C48H80O19	TRUE	TRUE	TRUE	72.7	62.4	75	983.54376:609 984.54711:374 985.55047:238	983.20441:28 983.55408:139	138	251	109	208	108	175	174	408	404	556	609	194	250	249	293	427	443	156	326	410	551	518	704
26558	13.548	497.231	Lucidenic acid B	[M+Na]+	TRUE	497.25	C27H38O7	TRUE	TRUE	TRUE	78.3	88	79.2	497.23929:1154 498.24264:157 499.246:79	497.23245:241	164	229	248	352	293	362	411	480	505	455	612	973	1154	1024	1072	1171	1291	544	522	734	876	908	706
9857	0.934	277.029	6-hydroxy-2-(4-hydroxyphenyl)-4H-chromen-4-one	[M+Na]+	TRUE	277.04	C15H10O4	TRUE	TRUE	TRUE	75.5	62.2	75	277.03024:2583 278.03359:325 279.03695:2939	221.11589:19 277.09457:74	2935	3619	3511	4023	3647	2002	2294	2383	2423	2567	2593	2492	2583	2651	2709	2682	2989	2450	2363	2509	2468	2609	2540
18382	1.019	381.08	Gardenin B	[M+Na]+	TRUE	381.095	C19H18O7	TRUE	TRUE	TRUE	70.9	68.6	75	381.08005:1721888 382.0834:454178 383.08676:337262	113.07272:38 180.95471:19 188.08511:38 200.50639:38 201.01439:667 201.03841:75 201.82571:38 203.81178:38 205.38661:19 219.0215:652 365.1033:19 379.86505:74 379.88156:74 380.10718:56 380.84506:58 381.07922:12894 381.29144:292 381.4072:77	1268555	1450855	1611890	1721888	1641158	556002	536759	633033	645501	537983	648449	668784	604050	611408	820165	591590	672912	738003	650455	722600	630409	774126	691110
14099	8.795	330.183	sinomenine	[M+H]+	TRUE	330.17	C19H23NO4	TRUE	TRUE	TRUE	80.3	75	75	330.17932:531 331.18267:257 332.18603:189	330.19073:37	315	204	197	328	333	484	516	602	609	746	557	531	531	834	682	770	984	454	469	657	761	759	685
10725	15.465	287.102	5,7,4'-Trihydroxy-8-methylflavanone	[M+H]+	TRUE	287.09	C16H14O5	TRUE	TRUE	TRUE	82.4	78.7	91.5	287.10159:5229 288.10494:919 289.1083:400	55.05658:3 59.01951:1 67.01833:3 67.01948:6 77.05157:3 81.07381:4 91.05443:11 93.0724:3 95.05053:4 107.05221:6 107.06681:3 111.05108:7 113.05624:3 113.05924:6 117.07153:3 119.04999:54 119.06539:17 119.08541:4 121.06211:4 123.04569:13 125.02013:3 128.8703:4 131.08299:4 135.11986:4 137.06126:10 142.0788:3 143.85768:3 145.09962:7 146.5929:4 147.04271:280 148.04572:6 149.13142:3 152.01353:4 155.08667…	1598	1260	682	1341	1705	3964	4895	4955	4536	5870	5982	2654	4194	2572	3008	3141	2956	4942	5229	5352	6004	6154	5994
18107	7.986	377.175	Angelol B	[M+H]+	TRUE	377.16	C20H24O7	TRUE	TRUE	TRUE	71.2	66.5	75	377.17426:590 378.17761:530 379.18097:150	132.0802:5 205.02625:5 376.01334:5 377.17749:74	590	616	700	813	852	124	182	241	280	253	179	193	206	278	248	208	208	158	195	232	240	226	180
22678	0.963	439.139	Sayaendoside	[M+Na]+	TRUE	439.157	C19H28O10	TRUE	TRUE	TRUE	69.3	71.8	77.9	439.14374:5719 440.14709:1413 441.15045:524	96.92837:37 277.08691:223 379.15302:19 437.76584:39 439.14615:907	1600	1694	1862	1890	1745	5344	6009	6615	6865	6976	7304	4911	4487	5033	5162	5199	5719	4054	4369	4967	4748	6030	3925
5925	6.883	339.157	Yohimbic Acid	[M-H]-	TRUE	339.171	C20H24N2O3	TRUE	TRUE	TRUE	84.5	72.9	73.9	339.17319:851 340.17654:0 341.1799:72	89.02658:9 339.16379:56 339.18719:28	877	851	799	1164	782	1359	1054	797	813	621	847	951	858	684	621	1228	779	1033	988	850	872	643	942
14801	18.392	337.176	tabersonine	[M+H]+	TRUE	337.19	C21H24N2O2	TRUE	TRUE	TRUE	79.6	85.3	87.1	337.17816:19655 338.18151:5007 339.18487:972	89.07306:19 309.12012:19 336.11026:38 336.33545:57 337.17728:1447	8479	8669	9509	8636	9066	22559	24850	19655	22609	23655	24613	19473	23740	17102	20613	19784	21645	31042	26820	28048	28591	33937	30932
37350	23.134	677.449	Pseudoginsenoside RT5	[M+Na]+	TRUE	677.42	C36H62O10	TRUE	TRUE	TRUE	85.1	72	75	677.42072:815 678.42407:1010 679.42743:1616	97.90903:19 536.50488:37 677.39038:56 677.49329:130	1137	1371	840	1237	1082	1251	1357	1152	1319	1491	1512	1097	1027	980	1247	1470	1759	1469	1227	1175	1507	815	1422
23212	6.705	447.149	5-hydroxy-3-(4-methoxyphenyl)-7-(((2S,3R,4S,5S,6R)-3,4,5-trihydroxy-6-(hydroxymethyl)tetrahydro-2H-pyran-2-yl)oxy)-4H-chromen-4-one	[M+H]+	TRUE	447.13	C22H22O10	TRUE	TRUE	TRUE	83.8	82.3	86.6	447.14056:2257 448.14391:447 449.14727:175	315.10181:19 445.77399:25 447.12204:19 447.1489:358	797	956	1008	1437	1327	2790	2850	2861	2663	3418	2661	6622	7511	6431	6527	7065	8341	2232	2257	3292	2724	3200	3050
4478	17.67	293.179	Koumidine	[M-H]-	TRUE	293.166	C19H22N2O	TRUE	TRUE	TRUE	78.7	61.6	74.8	293.17389:3823 294.17724:636 295.1806:7208	79.95398:38 96.96033:324 96.9784:76 235.17355:19 251.18588:19 293.17557:802	2973	3116	3122	3281	3358	4086	3823	4317	5036	3203	3382	3391	3568	2861	3453	3049	3024	3658	2614	3506	4126	2574	2276
29404	10.272	543.224	Benzoylgomisin O	[M+Na]+	TRUE	543.2	C30H32O8	TRUE	TRUE	TRUE	84.3	88	72.2	543.20007:1254 544.20342:136 545.20678:408	543.17554:111	216	386	336	384	334	716	970	1513	1325	1386	1183	1346	2023	1374	1476	1855	1576	763	621	1312	1036	1254	1201
24975	33.538	473.338	Saikogenin D	[M+H]+	TRUE	473.36	C30H48O4	TRUE	TRUE	TRUE	81.9	88	84.7	473.35132:416 474.35467:191 475.35803:192	473.34064:111	368	599	600	439	436	500	416	422	347	424	295	342	467	600	361	732	376	407	329	409	423	400	380
23934	33.541	457.347	Alpha-Boswellic acid	[M+H]+	TRUE	457.368	C30H48O3	TRUE	TRUE	TRUE	74	75	75	457.35379:358 458.35714:131 459.3605:89	457.30099:14 457.34628:190	525	561	623	306	364	538	409	513	340	534	385	288	556	682	304	771	354	362	358	464	557	237	441
5883	23.012	338.167	2-(5-cyano-1,4-dimethyl-6-oxopyridin-2-yl)oxy-N-(4-propan-2-ylphenyl)acetamide	[M-H]-	TRUE	338.151	C19H21N3O3	TRUE	TRUE	TRUE	63.3	70.5	74.6	338.15231:14394 339.15566:6879 340.15902:6532	116.60312:19 162.58949:39 162.96405:41 163.11183:2691 248.9715:56 323.11316:19 338.1644:75	10971	12450	10455	11057	10215	14394	15438	12681	13398	14687	12289	10254	9813	8400	9061	11946	17354	15131	12524	13267	12022	13361	10092
17966	20.699	375.229	10a-[(E)-2-(4-bromophenyl)ethenyl]-10,10-dimethyl-3,4,10,10a-tetrahydropyrimido[1,2-a]indol-2-ol	[M+H]+	TRUE	375.21	C24H26N2O2	TRUE	TRUE	TRUE	66.4	66.4	70.2	375.22281:826 376.22616:345 377.22952:138	74.05047:6 265.1907:12 268.99469:12 374.39334:12 375.23227:93	990	902	919	989	864	987	822	826	786	794	590	864	827	735	727	692	534	762	815	773	689	839	602
4995	16.799	311.134	Thymol-beta-D-glucoside	[M-H]-	TRUE	311.15	C16H24O6	TRUE	TRUE	TRUE	62.1	80.5	87.4	311.13898:59011 312.14233:11863 313.14569:4929	63.97745:6 79.96294:31 112.09814:6 119.04219:19 119.04989:155 170.00464:266 182.43047:37 183.00854:5127 183.07921:24 183.15752:80 183.2473:31 183.79224:19 183.87262:12 184.0181:186 184.08894:12 184.96898:12 195.01257:19 197.02422:124 198.02995:49 208.6804:6 211.0379:43 212.04996:62 225.05418:93 226.0632:62 237.21776:6 239.06914:87 240.07625:68 247.1964:12 247.20305:87 253.08058:19 293.21054:49 31…	55665	55733	54371	64596	57808	68314	56350	57501	52836	53947	55803	60973	61305	54020	55972	57918	57983	59394	58893	59011	54430	52141	57394
9594	5.571	447.119	Luteolin-7-O-glucoside	[M-H]-	TRUE	447.093	C21H20O11	TRUE	TRUE	TRUE	84.7	70.9	82.4	447.09735:692 448.1007:158 449.10406:79	59.02039:1 99.02174:1 108.01929:3 133.03171:3 143.04768:3 151.00323:3 152.01086:26 153.01834:4 161.04391:6 163.05263:3 179.0356:3 271.07968:3 315.07047:4 320.11865:1 403.12598:3 447.10913:106	1122	386	1222	1313	640	663	855	476	560	226	416	692	728	825	834	775	986	922	314	327	643	785	495
28286	9.31	525.289	Medicagenic acid	[M+Na]+	TRUE	525.32	C30H46O6	TRUE	TRUE	TRUE	74.8	75	70.8	525.31116:909 526.31451:282 527.31787:197	525.28717:176	1176	1440	1427	1308	1454	612	526	489	486	532	1250	629	463	909	867	972	1205	873	635	1221	379	753	695
19647	0.969	397.066	Casticin	[M+Na]+	TRUE	397.09	C19H18O8	TRUE	TRUE	TRUE	75.1	75	75	397.07657:2474 398.07992:1099 399.08328:549	397.08334:37	1836	2185	1139	2213	1386	2510	2474	2837	2667	2411	2541	2975	1926	1945	2376	1727	2053	2498	2397	2355	2450	2523	2428
7993	10.615	243.102	7,8-dimethylalloxazine	[M+H]+	TRUE	243.088	C12H10N4O2	TRUE	TRUE	TRUE	83.1	82	84.7	243.09294:688 244.09629:186 245.09965:0	170.07782:19 172.08099:37 198.06548:74 243.08507:37	379	264	282	360	488	521	600	406	605	844	865	338	526	501	688	480	728	636	471	615	951	904	919
791	23.951	96.9635	Phosphoric acid	[M-H]-	TRUE	96.9696	H3O4P	TRUE	TRUE	TRUE	65.7	79	88	96.96347:5544 97.96682:0 98.97018:904	76.97973:19 79.7068:77 79.96028:696 80.64454:37 81.95279:37 86.87878:19 96.96041:566 96.9757:214 97.00628:37	3480	3051	2812	3193	2908	3024	3323	3533	2844	4682	3441	3950	3201	3778	4050	4279	4508	3253	3867	5544	3606	4263	5324
5523	12.923	329.088	5,7-dihydroxy-2-(3-hydroxy-4-methoxyphenyl)-3-methoxychromen-4-one	[M-H]-	TRUE	329.067	C17H14O7	TRUE	TRUE	TRUE	61.6	76.4	88.2	329.07776:873 330.08111:0 331.08447:0	271.02402:37 297.04272:19 299.01883:93 299.03836:37 308.9877:19 314.04218:167 316.20193:19 329.05212:37	34377	36505	37689	35871	36844	2652	2907	1900	1581	1710	1948	1072	873	815	650	726	655	3246	3118	1800	2452	1932	2074
14997	18.417	339.195	Picrinine	[M+H]+	TRUE	339.17	C20H22N2O3	TRUE	TRUE	TRUE	77.4	75	75	339.1817:1248 340.18505:285 341.18841:300	339.18048:56	484	473	560	647	482	1070	1248	922	1092	1103	1228	1010	1170	1048	1169	1109	1149	1374	1244	1092	1316	1377	1387
4548	15.921	295.251	Octadecanedioic acid	[M-H-H2O]-	TRUE	295.228	C18H34O4	TRUE	TRUE	TRUE	92.8	77.8	90.7	295.22678:7844 296.23013:1950 297.23349:689	171.10149:31 195.13867:49 237.20868:6 277.21942:130 295.13663:25 295.22635:192 295.25061:43	4580	5259	5883	5313	5434	11619	10562	9016	9047	8896	10585	7844	8700	7303	6654	7417	7273	7329	7188	6837	5891	7011	6578

## Sheet: S2-stem
Alignment ID	Average Rt(min)	Average Mz	Metabolite name	Adduct type	MS/MS assigned	Reference m/z	Formula	RT matched	m/z matched	MS/MS matched	Total score	Dot product	Reverse dot product	MS1 isotopic spectrum	MS/MS spectrum	QC1	QC2	QC3	QC4	QC5	CK1	CK2	CK3	CK4	CK5	CK6	H1	H2	H3	H4	H5	H6	L1	L2	L3	L4	L5	L6
448	19.64	277.219	y-Linolenic acid	[M-H]-	TRUE	277.219	C18H30O2	TRUE	TRUE	TRUE	87	86	79.2	277.21884:18525 278.22219:5194 279.22555:345	205.20134:37 207.07376:19 233.23119:37 259.2095:75 277.22055:1355	7823	13108	10604	11212	12371	4938	7090	6120	5606	7038	6877	14110	16100	18525	15155	17419	16868	6982	10530	7209	7403	11505	6511
1698	12.989	351.213	Vinpocetine	[M+H]+	TRUE	351.207	C22H26N2O2	TRUE	TRUE	TRUE	82.1	88	81.8	351.21194:3730 352.21529:907 353.21865:190	351.21048:85	192	281	277	385	382	4009	2673	2630	3730	4112	2507	62	85	112	105	133	100	3594	1176	564	819	3823	1799
429	9.372	153.054	Vanillin	[M+H]+	TRUE	153.055	C8H8O3	TRUE	TRUE	TRUE	86.1	94	82.1	153.0602:1198 154.06355:0 155.06691:0	65.03881:93 65.0536:74 93.03393:93	1015	1198	1116	1445	1335	321	309	239	329	266	341	202	289	324	417	212	356	235	347	279	376	383	276
267	1.113	118.086	Valine	[M+H]+	TRUE	118.087	C5H11NO2	TRUE	TRUE	TRUE	89.1	94.7	85.3	118.08569:4620 119.08904:456 120.0924:456	53.04814:38 55.05721:309 56.05355:56 57.0599:93 58.06874:74 59.0528:37 70.2325:19 72.07925:188 72.08284:248 72.09483:57	1448	2320	1978	1931	2144	4029	1842	1890	1862	2900	2071	2722	2782	3734	4091	4319	3536	5288	2691	2950	3482	4620	3527
176	1.729	137.035	Urocanic acid	[M-H]-	TRUE	137.035	C6H6N2O2	TRUE	TRUE	TRUE	87.3	71.1	86.4	137.0354:2229 138.03875:636 139.04211:212	50.03199:1 52.02109:3 64.019:3 65.01777:10 66.03574:43 66.06557:3 67.03735:4 73.58621:1 79.95486:3 91.03261:3 92.75631:3 93.03381:7 93.04607:191 93.07874:6 93.34447:3 94.10281:3 94.97974:3 99.92983:11 108.02671:6 136.88968:10 136.94087:4 137.03174:4	511	373	510	221	463	123	178	345	115	367	290	1178	1726	2153	1653	2035	2229	680	1190	1237	853	795	1463
556	33.57	305.023	Uridine 5'-monophosphate	[M-H2O-H]-	TRUE	305.022	C9H13N2O9P	TRUE	TRUE	TRUE	87.3	82.5	86.9	305.02127:5766 306.02462:1033 307.02798:345	59.01372:378 59.04734:37 71.01514:19 116.97799:38 141.01816:490	2447	1858	2045	2419	2071	5148	5801	6081	5018	5499	5536	4612	6293	4357	5881	5766	5524	5050	5996	5281	4922	6177	5552
1680	0.807	565.047	Uridine 5'-diphosphogalactose	[M-H]-	TRUE	565.047	C15H24N2O17P2	TRUE	TRUE	TRUE	86.2	83.2	86.9	565.04578:2162 566.04913:2842 567.05249:356	59.03006:19 96.97765:19 108.89983:37 180.9902:19 191.0748:37 241.01057:37 305.02881:19 308.82437:38 314.95615:19 320.97119:57 322.00369:38 323.03027:632 340.87515:37 380.90472:19 384.98141:74 412.89743:19 414.79822:37 467.0524:19 526.85077:19 565.04395:418	1440	1436	1236	1303	1255	925	792	1176	893	1055	1233	1526	1703	1513	2237	2090	1944	1453	2715	2162	2197	2177	2202
523	2.767	182.08	Tyrosine	[M+H]+	TRUE	182.082	C18H32O7	TRUE	TRUE	TRUE	94.7	96	96.3	182.08003:7108 183.08338:882 184.08674:202	51.03276:5 63.02753:3 65.04144:13 77.03988:29 91.05406:151 95.04884:66 100.95913:8 107.04767:19 117.05777:5 118.06483:11 119.05001:127 123.04264:96 136.07512:106 146.02478:3 147.03975:13	1594	1850	2371	2668	1672	7108	2409	2553	1710	775	1205	3044	3563	2294	1551	1336	1751	6954	3162	3054	1163	2070	1065
282	6.486	203.079	Tryptophan	[M-H]-	TRUE	203.083	C11H12N2O2	TRUE	TRUE	TRUE	87.3	76.5	82.6	203.08507:1311 204.08842:212 205.09178:0	74.02319:28 116.05626:130 142.06105:19 142.06273:56	565	484	547	730	304	963	710	1003	884	727	860	961	1085	1311	1020	1490	989	928	1018	642	711	1135	815
353	0.973	138.055	Trigenolline	[M+H]+	TRUE	138.055	C7H7NO2	TRUE	TRUE	TRUE	91.3	91	89.5	138.05493:6794 139.05828:1212 140.06164:110	51.02604:37 53.03996:37 58.06767:19 65.04185:111 65.04755:74 66.04062:37 67.06317:74 78.03719:167 79.0417:93 80.04758:38 82.07458:19 92.05405:446 93.05761:74 93.85043:57 94.06387:345 95.07967:37 102.94508:19 120.04459:37 136.03798:56 138.04236:75 138.05397:691	6361	7842	7347	7763	8857	2874	904	1179	1186	880	1104	3679	4240	4581	4312	4236	4154	6794	3925	3864	3984	2966	2877
1440	9.968	331.081	Tricin	[M+H]+	TRUE	331.081	C17H14O7	TRUE	TRUE	TRUE	93.2	91.4	88.8	331.08124:95354 332.08459:24143 333.08795:5673	85.03284:19 98.98509:56 134.03848:19 136.01497:74 137.02103:56 139.05092:37 153.01561:167 159.04373:19 178.0264:186 179.06566:56 185.03242:37 187.50217:19 193.0768:19 201.05209:37 203.03241:223 203.05856:19 213.05489:56 214.06152:74 216.03836:37 225.47346:19 229.04839:93 237.87572:19 241.04733:74 242.05211:432 243.06557:56 245.04802:37 253.04489:37 256.06268:56 257.04169:74 258.05655:281 269.0416…	172414	202134	226877	254888	246383	46951	59571	59316	65842	65190	74714	100894	95354	96945	100903	108716	92136	58169	69672	66388	63958	65573	54262
787	1.013	341.108	Trehalose	[M-H]-	TRUE	341.109	C12H22O11	TRUE	TRUE	TRUE	94.6	87.8	94.1	341.10855:983056 342.1119:203962 343.11526:53598	51.02542:74 53.00315:37 55.02057:428 55.03942:56 55.54002:38 57.00106:319 57.01171:116 57.03836:527 58.00819:812 58.83779:490 58.85512:37 58.88111:79 59.01873:30444 59.15:6699 59.1652:744 59.21515:504 59.27382:357 59.2912:97 59.31729:56 59.34229:617 59.36404:64 59.39993:60 59.41407:324 59.43366:125 59.46304:74 59.50223:74 59.52401:148 59.58609:56 59.70381:130 59.73981:56 59.82056:56 59.88062:56 6…	1034119	978677	1032848	956750	957142	1335196	1238408	1419544	1191861	1271437	1191499	1035862	1242743	1134252	994834	1141752	1116644	1025664	1097342	997906	992586	1083200	983056
464	22.864	281.247	Trans-Vaccenic acid	[M-H]-	TRUE	281.248	C18H34O2	TRUE	TRUE	TRUE	84.9	82.5	75.2	281.24802:49569 282.25137:9730 283.25473:2355	111.06135:19 149.0226:37 237.98264:37 263.23615:37 280.36697:93 281.2468:8128 281.42908:324 281.54276:130 281.68723:56	83908	146524	94548	120411	83998	66962	68790	60521	56691	54501	49569	55058	53314	52303	48347	46107	44493	57857	53536	41357	40121	54236	41628
497	8.107	177.053	trans-Ferulic acid	[M+H-H2O]+	TRUE	177.055	C10H10O4	TRUE	TRUE	TRUE	80.3	77.3	73.3	177.05472:5902 178.05807:805 179.06143:270	55.94452:19 63.0288:28 72.93705:14 77.04009:37 78.0519:51 89.03982:362 91.05569:28 91.06782:14 95.08492:5 101.04174:5 105.03487:14 106.03979:33 112.95303:9 117.03223:283 117.93032:9 118.03918:9 121.06571:14 134.03497:98 145.02751:88 149.0584:74 149.07564:19 160.08469:5	2788	3236	3512	3224	3695	5902	5064	5112	5378	6416	6180	5437	5801	7030	7807	8072	7902	4593	5287	4442	5527	6784	5267
601	0.923	203.049	Theophylline	[M+Na]+	TRUE	203.05	C7H8N4O2	TRUE	TRUE	TRUE	90.4	88	75	203.05:9639 204.05335:794 205.05671:262	203.05453:56	9426	11057	10745	10327	12167	10962	4006	4322	4461	4337	2387	10466	9760	12388	9826	9639	11589	13293	9888	7160	8340	10762	6504
2890	10.032	485.107	Tectoridin	[M+Na]+	TRUE	485.1	C22H22O11	TRUE	TRUE	TRUE	87.7	75.1	84.7	485.10184:3134 486.10519:422 487.10855:105	322.04385:19 323.05023:93 483.8606:19 485.10336:186	1870	3134	3206	3055	2638	884	728	822	1299	1130	1327	1330	1395	1383	1178	926	1487	1066	1136	1082	879	1116	808
1512	10.04	507.113	Syringetin-3-O-glucoside	[M-H]-	TRUE	507.114	C23H24O13	TRUE	TRUE	TRUE	87	87.6	87.1	507.11337:2140 508.11672:948 509.12008:118	135.02429:19 151.00058:37 230.01717:19 241.01117:37 273.05051:37 287.05353:19 301.03922:56 315.05438:19 327.03598:37 330.03168:37 342.98447:19 344.05438:223 345.05518:74 345.09714:56 349.89615:38 489.17297:19 492.13989:39 507.11237:740	1948	1984	2065	2069	2140	74	176	171	188	106	304	301	432	400	449	281	593	111	248	221	226	208	181
2627	9.682	447.131	Swertisin	[M+H]+	TRUE	447.13	C22H22O10	TRUE	TRUE	TRUE	94.3	87.4	96.5	447.1308:11190 448.13415:4019 449.13751:1769	267.06451:93 281.0842:19 285.07397:38 292.06824:19 297.05139:57 297.0733:924 304.06223:19 309.06931:56 311.09009:37 323.09152:186 325.06339:19 327.08206:245 327.1076:151 329.46561:19 337.09821:56 337.10596:223 339.08109:37 343.0303:37 347.10757:19 351.08725:377 360.06223:19 363.0871:93 365.09634:56 373.11514:19 375.08627:204 376.13675:19 381.09427:111 389.96014:19 393.09668:241 409.81311:19 411.1…	6879	9040	9040	10358	11190	1088	1116	1055	1210	1190	1903	6035	6364	6492	7684	7015	6164	3482	2874	3034	3003	2514	2743
1868	1.025	365.106	SUCROSE	[M+Na]+	TRUE	365.105	C12H22O11	TRUE	TRUE	TRUE	95.6	91.6	93.1	365.1055:69349 366.10885:16325 367.11221:2148	160.09239:19 185.0289:78 185.04234:1980 185.78812:20 191.30031:19 202.40778:39 202.4379:61 203.05092:5990 203.29639:43 214.24376:19 259.05588:19 363.96158:93 365.06653:118 365.10428:4564	141695	145643	171513	165414	169587	109262	53991	59126	52379	57084	54459	61541	49209	69349	58398	53086	69588	82123	54362	41146	51139	63784	44375
485	24.709	283.265	Stearic acid	[M-H]-	TRUE	283.265	C18H36O2	TRUE	TRUE	TRUE	83.3	82.3	76.4	283.26505:236610 284.2684:54027 285.27176:6432	192.0594:19 223.73206:19 265.25488:354 282.36475:205 282.5545:74 282.87253:55 283.18118:145 283.26434:39884 283.44727:554 283.55182:1446 283.6897:740	236610	242631	222450	216870	195362	305044	223964	233208	147657	268841	260712	246306	185294	239590	206118	256287	247214	229542	198943	255843	236267	338598	247955
1163	17.157	302.305	Sphinganine	[M+H]+	TRUE	302.306	C18H39NO2	TRUE	TRUE	TRUE	85.6	83.3	90.7	302.3038:1268 303.30715:265 304.31051:18	55.06073:3 60.04769:10 60.05754:6 60.90611:1 67.05672:3 71.08603:3 81.06812:3 81.08718:3 88.07777:3 95.08602:3 109.1037:3 123.12127:3 209.08664:1 217.21213:3 240.26343:4 254.28369:11 266.28436:4 272.16721:3 284.29465:19 302.14291:4 302.30734:16	466	292	304	351	280	1907	1614	1785	1181	822	759	1143	1268	1312	694	571	777	1491	1259	1167	859	920	698
813	0.907	258.107	sn-Glycero-3-phosphocholine	[M]+	TRUE	258.111	C8H21NO6P	TRUE	TRUE	TRUE	87.3	74.8	92.4	258.10663:4762 259.10998:745 260.11334:152	60.07953:37 60.08281:74 86.09552:130 86.10469:93 98.985:56 104.10678:604 105.00166:38 124.99887:355 156.01627:19 166.06061:148 184.07027:167 240.01494:19 258.10519:74	2088	2344	3004	2677	2851	5679	2509	2373	2831	2740	2814	4625	4946	6338	5351	6004	7143	8226	5478	4955	4762	4929	4609
3328	14.435	861.247	Smiglaside C (Not validated) + 1Acetyl	[M-H]-	TRUE	861.247	C40H46O21	TRUE	TRUE	TRUE	82.7	77.8	82	861.24298:3989 862.24633:1943 863.24969:1227	154.91684:9 160.01035:46 161.0314:9 175.03932:74 177.41135:9 541.15802:9 583.16522:19 601.18268:19 625.17462:46 649.1756:9 670.03613:9 685.20239:28 759.21375:19 781.96094:9 801.22003:74 801.26001:28 819.19788:19 819.23016:93 819.25848:37 858.91333:19 861.20233:78 861.24377:1576	3587	3816	4124	3989	3923	1812	2167	2024	1494	2052	2201	5052	5089	2770	4531	4459	2549	1856	3362	3077	2224	3357	2120
1005	8.408	385.111	1-o-sinapoylglucose	[M-H]-	TRUE	385.113	C17H22O10	TRUE	TRUE	TRUE	86.6	84.1	82.7	385.11166:4956 386.11501:593 387.11837:692	71.01942:19 89.02141:37 147.01665:19 149.02228:56 164.04721:111 165.15178:9 175.00571:65 177.04681:9 179.06575:47 190.02609:395 191.13672:19 205.04994:949 206.05362:37 208.05203:19 221.0795:19 223.05869:158 229.53854:9 237.07727:28 247.06836:37 247.08167:46 265.06158:28 265.06619:37 325.07608:19 385.11987:19	4956	4589	4702	4344	4743	4514	5518	5560	4307	6926	8693	5441	7866	5489	5842	7489	6519	4643	8320	5512	5274	7995	5480
2881	15.374	483.123	Silydianin	[M+H]+	TRUE	483.13	C25H22O10	TRUE	TRUE	TRUE	85.9	94	75.1	483.12753:1435 484.13088:471 485.13424:190	483.12894:77	1921	1733	1956	1539	1658	1599	1699	1262	1079	1787	1728	1163	1865	1392	845	1059	1263	1704	1472	722	1669	2237	1435
3272	8.525	541.148	Sibiricose A5	[M+Na]+	TRUE	541.15	C22H30O14	TRUE	TRUE	TRUE	83.9	82.4	63.1	541.15198:1738 542.15533:658 543.15869:344	185.03593:19 203.05225:19 379.10114:139 379.12314:37 541.15582:102	481	603	599	439	461	1997	1507	1447	1292	1156	1065	1393	1738	1055	1323	1269	1641	2392	1591	1060	1216	1433	1446
360	7.605	139.039	Salicylic acid	[M+H]+	TRUE	139.039	C7H6O3	TRUE	TRUE	TRUE	85.6	86.5	86.1	139.03754:3098 140.04089:351 141.04425:53	55.06612:9 65.04105:244 65.05471:65 77.03921:19 77.05408:19 84.96012:9 93.03288:74 95.06838:19 121.02623:269 139.04121:19	2230	2556	2919	3017	3098	1580	1746	1625	1751	2246	2786	2741	3007	3409	3624	3985	3846	2414	2543	2540	2657	2935	2772
489	15.385	285.078	Sakuranetin	[M-H]-	TRUE	285.077	C16H14O5	TRUE	TRUE	TRUE	85.7	83.9	85.5	285.07779:2243 286.08114:100 287.0845:100	65.0119:19 93.03635:28 97.04291:19 119.04996:278 120.05305:19 121.0262:19 146.0321:9 165.01711:288 176.03366:9 285.08383:28	2025	2094	2243	2118	2215	32	1	29	73	1	1	1	1	30	54	1	28	1	1	31	29	38	1
146	0.921	128.036	Pyroglutamic acid	[M-H]-	TRUE	128.034	C5H7NO3	TRUE	TRUE	TRUE	83	72.6	72.6	128.03764:2455 129.04099:136 130.04435:0	82.03297:19 128.03214:19 128.03372:37 128.04012:19 128.04491:19 128.04651:19 128.05289:19 128.05928:19	592	626	709	556	674	794	463	878	900	499	710	1624	2455	2477	2179	2541	1983	1228	2110	1832	1580	1733	1512
260	0.988	116.072	Proline	[M+H]+	TRUE	116.071	C5H9NO2	TRUE	TRUE	TRUE	91	81.1	88.1	116.0714:12347 117.07475:1702 118.07811:724	53.05246:19 68.05196:130 68.06711:37 69.85703:40 69.90187:60 70.06719:2811 70.15939:58 71.07037:56 76.15128:19 80.97388:74 80.99293:19 98.99151:37 116.07173:74	2406	3133	3405	3357	3746	6301	2318	2642	2358	1946	2286	9552	12347	12835	11213	12014	10809	12805	8004	5845	5844	8821	5166
3294	9.533	543.178	Pinoresinol 4-O-glucoside	[M+Na]+	TRUE	543.18	C26H32O11	TRUE	TRUE	TRUE	84.5	72.6	75	543.17761:1240 544.18096:589 545.18432:263	321.00449:19 541.8067:38 543.17114:338 543.22046:93	766	813	604	468	436	675	606	745	582	593	379	442	592	459	754	529	606	838	810	872	724	1240	908
3310	23.348	855.496	PI 36:5	[M-H]-	TRUE	855.503	C45H77O13P	TRUE	TRUE	TRUE	84.6	86.9	79.5	855.50452:16127 856.50787:9889 857.51123:4215	91.54218:9 153.00247:28 223.00177:28 241.01178:121 259.0278:19 277.21823:111 279.23816:130 293.27606:9 297.06128:28 413.2164:84 415.22717:65 575.27545:56 577.27789:93 593.25751:19 595.30469:37 852.7384:28 852.77551:84 852.84967:28 853.3114:28 854.9696:37 855.33698:35 855.51855:12287 855.61353:91 855.82825:963 855.97278:47	10096	16421	20506	18856	17520	15548	14388	17651	11878	11911	11622	14282	16751	15666	14433	14945	14334	16136	23493	15913	16127	22756	15743
3319	23.815	857.516	PI 36:4	[M-H]-	TRUE	857.52	C45H79O13P	TRUE	TRUE	TRUE	85	91.4	76.2	857.5166:74147 858.51995:74039 859.52331:20350	78.96303:28 152.99536:176 222.99966:148 241.01183:489 259.01425:46 273.03949:9 277.21365:56 279.23123:1125 281.23718:19 292.81235:9 297.0347:121 315.05002:56 413.20535:19 415.22189:518 417.25195:28 431.99414:9 433.23593:65 572.19312:9 575.92987:19 577.27539:660 579.28467:37 595.25745:19 595.28497:111 695.44739:19 797.63184:19 831.50769:176 832.50513:28 854.77325:237 854.80627:255 855.30566:37 856…	71163	65451	54476	65750	56600	84801	41066	74147	60255	74844	63552	84717	74489	76171	76932	83338	87864	89102	106846	71120	67130	99190	69560
3325	24.232	859.535	PI 36:3	[M-H]-	TRUE	859.53	C45H81O13P	TRUE	TRUE	TRUE	90.8	84.1	83	859.5318:69424 860.53515:46737 861.53851:18866	78.97642:19 134.98495:19 152.99646:111 203.43939:19 223.00302:111 229.15511:19 241.01091:364 244.42357:19 259.01102:37 259.02237:57 269.24329:38 279.23257:378 280.23111:38 281.24564:448 293.29935:19 297.03363:74 404.81207:19 415.22052:204 415.91968:38 417.23904:281 420.96643:19 575.98907:19 577.2804:223 579.28967:350 584.36572:19 595.27283:37 597.29938:74 685.46893:19 785.49036:19 831.40356:19 84…	38927	32745	44717	38099	45463	79705	60492	71678	59236	69179	58828	76502	69424	89292	75061	64246	83542	73156	76567	65599	74069	91408	69110
3331	24.818	861.547	PI 36:2	[M-H]-	TRUE	861.55	C45H83O13P	TRUE	TRUE	TRUE	91.6	87.3	86.4	861.54968:25696 862.55303:20567 863.55639:3810	152.99829:74 189.05762:19 223.00322:74 241.01115:148 259.03854:37 279.23523:130 281.24356:74 283.25909:111 294.24313:19 392.57907:19 417.23096:37 419.26016:148 435.2822:19 561.38928:19 577.2677:37 579.29736:56 579.54877:19 581.29315:93 835.54492:148 858.79614:74 858.82507:93 858.85815:56 859.92566:48 861.50745:124 861.55304:15587 861.86792:1032	6218	5978	7317	9951	6628	13109	11237	19650	14264	19002	18942	21014	21102	29634	24402	30426	29980	28929	25696	25291	23967	27977	28325
3155	24.158	833.527	PI 34:2	[M-H]-	TRUE	833.517	C43H79O13P	TRUE	TRUE	TRUE	94.1	87.6	93.4	833.51953:1516180 834.52288:1101845 835.52624:358145	68.20634:19 78.96143:244 91.7039:19 96.97034:56 131.10815:19 152.01482:38 152.99438:1757 167.69795:19 171.00409:56 204.98889:99 220.21561:38 222.30249:56 222.99959:1561 225.13983:38 225.84985:19 238.98288:19 241.00983:7855 241.79491:34 244.01227:37 251.67581:19 254.4375:82 255.23061:7812 256.23953:34 256.82956:37 258.21802:38 259.02151:512 261.22736:56 277.21909:19 278.52255:50 279.22964:7187 280…	577402	1245245	1023080	939142	1146911	1516180	1272643	1385855	1235079	1463765	1302792	1778642	1627014	1731512	1910425	1582303	1788922	1540974	1701119	1688797	1722472	1717800	1395441
3174	24.159	835.528	PI 34:1	[M-H]-	TRUE	835.532	C43H81O13P	TRUE	TRUE	TRUE	89	80.9	85.6	835.52728:245686 836.53063:93419 837.53399:16722	78.95808:65 152.99481:463 153.99504:65 154.99503:28 171.00081:19 222.99574:223 224.00014:121 224.99832:37 241.01018:1186 242.01257:388 243.01486:232 250.79471:19 255.23318:899 256.23535:688 257.23721:309 259.01959:74 260.02914:37 261.02927:37 279.22995:748 280.2356:740 281.24066:232 282.03891:19 297.03604:241 298.0318:93 299.03653:56 315.04663:74 316.05453:56 390.20923:19 391.22195:530 392.22763:…	104009	176007	181093	156766	177016	204609	176880	200841	168280	201455	188918	245686	222470	253795	273651	211754	253057	201642	235366	230072	239006	235582	197442
3201	24.666	837.545	PI 34:0	[M-H]-	TRUE	837.548	C43H83O13P	TRUE	TRUE	TRUE	83.6	81.9	78.8	837.54462:26424 838.54797:5574 839.55133:1287	150.98541:19 152.99518:37 202.93132:19 223.01048:74 225.0237:19 241.01224:148 242.00806:37 243.02573:19 255.2262:56 255.23297:111 256.23962:56 281.245:74 282.25662:130 283.26767:56 391.23474:56 392.22644:56 392.246:56 393.23059:37 418.24908:37 496.61496:19 525.17108:19 553.25659:37 554.2829:93 555.29352:111 573.28748:37 580.3042:37 763.50977:37 772.52185:74 780.42316:19 819.34442:56 834.87061:74 …	7718	11093	12188	10288	10798	25941	15674	26719	19926	25446	21288	26424	23568	35119	31784	25577	23250	32556	27904	30194	25332	27979	26012
2872	24.078	807.516	PI 32:1	[M-H]-	TRUE	807.501	C41H77O13P	TRUE	TRUE	TRUE	82.3	81.2	75.1	807.5036:7420 808.50695:6042 809.51031:576	110.96598:19 172.31471:19 241.01018:93 241.02991:19 253.21661:56 255.22171:93 277.23999:19 279.22464:37 283.28409:19 297.0303:56 363.20343:19 389.20648:56 391.22226:56 553.26343:37 553.28003:93 744.49084:19 789.50433:19 792.49738:167 804.97461:37 807.07428:46 807.46332:130 807.49939:3283	8363	6716	7489	7420	7351	7074	2882	5961	5313	6306	5386	7867	6123	8395	10502	7350	5077	9379	6921	10266	8296	7075	4652
2882	24.616	809.515	PI 32:0	[M-H]-	TRUE	809.513	C41H79O13P	TRUE	TRUE	TRUE	84.1	90.7	72.9	809.51526:20615 810.51861:8580 811.52197:3432	114.02766:37 142.99277:19 175.02335:19 222.99446:56 241.00636:148 255.23357:278 279.96161:19 292.74826:19 295.25543:74 297.03094:37 385.31317:19 391.22858:93 393.23001:19 513.3114:19 524.32532:56 525.33093:93 544.08014:19 547.33112:19 553.28424:148 567.28882:19 571.28278:37 744.21075:19 746.49963:74 806.92303:56 807.44031:56 809.47498:63 809.52716:7768 809.81635:277 810.00916:95	16646	20220	16860	20615	18871	15999	11045	13273	8974	19116	16045	19623	17232	22138	19109	21680	23315	16404	15921	13856	13564	16053	15467
1328	16.253	318.3	Phytosphingosine	[M+H]+	TRUE	318.3	C18H39NO3	TRUE	TRUE	TRUE	91.9	87.3	92.2	318.30087:24711 319.30422:6155 320.30758:839	55.05612:24 56.05139:29 57.03318:8 57.0737:27 57.08543:8 58.66395:3 59.86688:11 60.04722:512 65.24687:3 67.05502:21 69.07195:27 71.08782:19 72.04551:11 74.05784:8 74.06148:16 77.04031:3 79.05798:11 81.07123:34 82.06816:13 83.0519:8 83.0892:27 85.10203:13 86.06181:11 88.07435:11 93.06713:5 93.06985:16 93.08484:13 95.08792:42 95.10307:16 96.08016:8 97.10259:16 107.08627:13 107.1038:3 109.10122:19 1…	108	95	88	207	183	22846	21753	21669	19856	13528	12671	24711	22530	22691	14696	12996	15419	29534	21024	23272	15727	16853	15848
109	0.755	96.9617	Phosphoric acid	[M-H]-	TRUE	96.9608	H3O4P	TRUE	TRUE	TRUE	86.6	72.5	81.7	96.96173:52317 97.96508:897 98.96844:4558	55.56756:19 62.96341:56 62.97349:37 78.96016:1075 78.98273:107 79.7132:281 79.82286:135 79.96163:26549 80.11189:389 80.12453:111 80.19656:156 80.33691:1067 80.36095:56 80.41663:524 80.43815:152 80.47487:250 80.53439:83 80.54705:161 80.61294:56 80.62434:158 80.68518:223 80.75746:357 80.76508:75 80.8945:37 81.09012:37 81.1435:56 82.46729:37 96.66024:74 96.67551:56 96.96159:10481 97.06725:609 97.131…	52317	50708	48457	50151	53018	37733	39075	45304	43460	44309	44677	45124	52593	55940	55902	58254	53039	44489	54360	48773	50422	58392	50645
462	5.868	166.085	Phenylalanine	[M+H]+	TRUE	166.087	C9H11NO2	TRUE	TRUE	TRUE	90.5	84.8	86.3	166.08563:5350 167.08898:540 168.09234:117	72.94824:6 77.03921:74 79.05436:56 91.06013:37 93.07003:68 102.81641:13 103.05415:363 107.04849:31 118.06267:12 119.06941:25 120.07888:873	2550	3608	3296	3696	4104	7220	3696	3612	2115	985	1231	5350	5622	4003	2266	2108	2783	8464	4975	3124	2370	2640	1595
2671	23.964	773.535	PG 36:2	[M-H]-	TRUE	773.528	C42H79O10P	TRUE	TRUE	TRUE	82.6	83	70.7	773.53082:7193 774.53417:3348 775.53753:1860	152.99324:19 152.99673:46 227.03522:19 267.23605:167 277.21664:46 279.2366:37 281.24496:93 283.26053:19 291.45496:9 295.26483:65 417.24536:28 431.25156:19 445.27448:9 491.29822:19 505.28677:37 509.28906:28 523.29712:19 523.31329:28 537.30878:19 591.36627:19 669.44812:28 671.49109:19 699.50439:19 706.9527:9 739.7984:9 741.48083:46 771.07574:28 772.64429:19 773.44482:48 773.54297:2040 773.82172:28	5576	8655	7638	8421	6325	8182	4175	6362	5917	6652	5764	7193	5709	4328	5964	4910	5302	5951	4602	4007	3674	4026	4811
2461	24.556	745.504	PG 34:2	[M-H]-	TRUE	745.5	C40H75O10P	TRUE	TRUE	TRUE	91.1	80.7	90.7	745.50208:1194372 746.50543:686935 747.50879:242764	55.3765:19 73.42131:19 78.96065:223 134.97757:37 135.04152:19 150.97891:37 152.51588:77 152.99387:6212 156.29355:38 158.39503:38 165.57462:38 166.94682:19 171.00513:1051 191.43161:19 203.96829:19 209.01225:93 209.02042:374 218.42265:19 227.03325:450 227.05664:38 242.20567:19 248.57758:19 252.42876:39 253.21423:1187 254.41049:74 254.43074:223 254.4465:111 255.00066:70 255.23059:52306 255.40651:194…	555226	826807	838118	1152792	1196520	1212529	1226304	1194372	1223217	1232082	1253454	1699333	1675653	1780294	1740911	1928906	1731696	1756002	2204314	2149129	2100528	2196832	1840758
2241	23.994	717.463	PG 32:2	[M-H]-	TRUE	717.468	C38H71O10P	TRUE	TRUE	TRUE	82.8	84.8	81.1	717.46259:8674 718.46594:3431 719.4693:4288	150.01453:19 171.00865:19 225.19023:19 227.20683:225 227.22597:111 251.22263:38 253.21307:377 253.26923:19 255.23166:37 279.23016:392 297.24994:19 389.1954:37 389.21487:56 415.25366:19 455.24179:56 463.24182:56 481.26678:37 715.18665:82 715.67737:40 717.47205:3731 717.76312:62 717.95221:56	8674	6969	6356	7103	7237	4933	3251	4999	2205	4321	3775	4773	5566	3628	3802	6274	6027	5318	9348	3806	3990	6764	6159
2256	24.48	719.489	PG 32:1	[M-H]-	TRUE	719.486	C38H73O10P	TRUE	TRUE	TRUE	85	83	75.3	719.48413:33870 720.48748:22050 721.49084:23100	152.99532:241 153.01453:56 160.24033:19 171.01207:56 207.79305:19 227.19821:111 237.22667:19 252.43431:40 253.21306:1772 254.62096:40 254.91382:39 255.23164:1441 279.25854:19 281.24091:167 370.78009:19 389.20422:111 389.22372:56 391.22559:148 407.33127:19 424.0437:37 463.23654:93 465.26492:167 481.24286:74 483.26373:148 483.28854:74 673.4837:19 717.17908:130 717.20557:130 717.24713:74 717.69324:4…	62546	70156	57863	63716	68354	24247	22645	25196	14969	40215	25673	37777	30190	40905	30067	33870	29948	25976	35762	42896	37285	40229	32511
2104	24.358	693.475	PG 30:0	[M-H]-	TRUE	693.468	C36H71O10P	TRUE	TRUE	TRUE	86	79.8	77.7	693.46851:19885 694.47186:12005 695.47522:95500	71.31165:19 134.98409:19 152.99736:431 171.01256:37 209.02872:37 227.20148:1449 235.00491:19 241.20749:37 241.21187:148 243.84953:38 253.21674:38 255.23312:1721 260.36597:38 277.21677:317 278.22113:148 279.23434:278 362.04584:19 363.19348:167 370.91351:19 391.22324:167 401.64899:19 413.20963:262 414.21729:93 415.2233:281 431.2186:93 433.21982:37 433.23743:223 434.24567:19 437.23315:148 437.25974:…	11974	19113	20638	19728	19885	18880	20783	21028	19906	23321	20488	24413	24963	26981	27669	27788	25223	29311	32214	29244	30999	32290	28921
2768	9.999	463.122	Peonidin-3-O-glucoside	[M]+	TRUE	463.123	C22H23O11	TRUE	TRUE	TRUE	85.3	76.5	82.5	463.12177:25205 464.12512:7050 465.12848:1792	55.05465:9 81.04612:9 85.02938:56 97.02896:19 114.0901:102 115.09492:28 127.03782:19 134.10829:9 145.056:19 209.16824:37 227.17181:28 228.15578:46 229.1611:46 229.18675:19 246.19974:19 258.05087:74 281.03918:9 286.04715:348 300.11981:38 300.39374:20 301.02771:23 301.06937:4377 301.26288:46 301.37314:19 301.50302:19 301.77267:19 302.0719:28 302.83044:19 305.07233:19 307.70117:19 313.06763:204 313.…	22261	24827	19136	25205	23205	4355	4293	5172	5904	5711	7831	9904	9471	11510	12394	9489	9689	5300	5934	5699	5935	5647	4247
2766	10.524	463.12	peonidin-3-o-beta-d-glucopyranoside	[M]+	TRUE	463.124	C22H23O11	TRUE	TRUE	TRUE	81.9	73.9	77.2	463.12708:4742 464.13043:971 465.13379:108	258.05551:37 286.04303:76 301.0679:885 316.12585:19 331.08365:130 441.93045:19 463.20456:37	5144	6759	4944	5973	7720	932	1738	1423	1598	1505	3022	3650	4018	4742	4073	3318	4996	1052	1448	1454	784	1230	1316
338	20.795	241.216	Pentadecanoic acid	[M-H]-	TRUE	241.216	C15H30O2	TRUE	TRUE	TRUE	85.4	88	77.6	241.21677:2038 242.22012:246 243.22348:0	223.21751:19 241.21637:315	4276	4734	5230	4956	4608	1272	1101	1782	1711	1913	1478	944	1696	1720	1664	1592	1614	922	2037	1150	1252	2038	1485
1239	9.449	431.096	Pelargonidin-3-O-glucoside	[M-2H]-	TRUE	431.098	C21H21O10	TRUE	TRUE	TRUE	86.4	93.5	83.1	431.09497:3264 432.09832:1172 433.10168:294	225.04807:12 241.07008:6 269.04855:982 283.05893:19 301.07504:6 311.05771:56 325.2352:6 383.08252:6 431.09674:462 431.1319:100	2958	3264	3293	3168	3597	427	476	495	323	606	734	1111	1290	828	1258	1063	1022	514	674	845	644	501	833
2362	24.03	738.505	PE 36:4	[M-H]-	TRUE	738.503	C41H74NO8P	TRUE	TRUE	TRUE	82	80.7	78.8	738.50732:14437 739.51067:10459 740.51403:47711	78.95961:19 140.0271:74 255.23073:19 257.24829:19 277.2189:74 278.22559:56 279.23178:2123 280.23267:37 281.24008:37 458.26215:56 463.48587:19 476.27728:186 477.24805:19 678.49805:186 716.5235:37 736.13556:56 738.13971:37 738.43884:41 738.50787:3861 738.78412:68 738.97974:93	1314	670	327	858	1298	11287	9091	14437	14001	18138	17202	6966	14264	14667	9222	16435	14320	9639	11685	12941	9369	14605	10289
2203	23.961	712.504	PE 34:3	[M-H]-	TRUE	712.488	C39H72NO8P	TRUE	TRUE	TRUE	81.9	72.7	81.1	712.48944:6254 713.49279:3860 714.49615:29711	233.21832:19 255.23274:260 255.25755:74 267.23138:19 276.34314:76 277.21432:787 278.21631:20 279.23663:148 280.23047:93 281.24976:111 282.25189:56 409.3158:19 416.21796:37 429.20068:37 431.2236:56 434.27426:37 437.60138:19 448.2832:37 450.30264:19 452.27859:93 452.31461:56 456.28867:19 474.27179:56 506.08234:37 710.22559:37 712.36371:77 712.49561:2037	0	1475	2386	2199	1930	3835	4417	8893	9880	6328	12188	3530	12815	15699	15309	9446	4729	6254	4252	7414	5738	4043	4078
2969	24.296	816.577	PC 34:2	[M+CH3COOH-H]-	TRUE	816.575	C42H80NO8P	TRUE	TRUE	TRUE	80.1	72.6	75.9	816.57239:9650 817.57574:15050 818.5791:7956	242.0715:19 255.23491:186 278.21585:57 279.2338:478 281.25162:37 364.19122:19 391.24741:19 478.78152:19 480.30219:56 636.63525:19 671.4649:37 736.40753:19 740.16583:37 741.52197:41 742.54077:3192 742.83313:89 743.7066:37 746.22217:37 753.51538:37 757.49182:74 766.53864:130 772.49377:37 810.62018:37 816.48975:111 816.57037:717 816.65106:232 816.70349:74	593	406	164	107	432	8545	8086	9650	12877	13601	12437	8581	6165	13558	16169	16218	13375	7288	7714	10011	11940	13417	12949
671	6.474	220.118	Pantothenate	[M+H]+	TRUE	220.118	C9H17NO5	TRUE	TRUE	TRUE	90.8	81.2	90.5	220.11841:8883 221.12176:1264 222.12512:284	55.0201:6 55.03267:4 55.06304:6 56.01506:4 57.07224:21 59.05126:16 59.05994:7 60.02389:1 65.0392:4 67.05473:27 67.07323:4 68.05248:3 69.06816:10 70.02992:36 72.04766:74 73.02747:13 74.02361:6 79.05531:4 81.07236:7 83.05048:7 85.06548:30 86.0984:6 89.78078:6 90.05518:141 90.24683:4 90.69124:3 94.06525:4 95.04941:33 96.0802:13 98.02425:71 99.08084:4 100.03718:6 100.04707:6 103.07558:16 112.07017:3 …	2414	3539	3758	4454	4992	19843	9450	9962	8859	10176	8234	10035	9179	9828	8883	12079	11178	19711	9235	10849	9499	11975	11043
367	20.421	253.219	Palmitoleic acid	[M-H]-	TRUE	253.217	C16H30O2	TRUE	TRUE	TRUE	85.3	88	78.8	253.21584:1996 254.21919:226 255.22255:452	253.21362:223	3263	3681	4427	4320	3891	1964	1770	2512	3059	2361	2005	1727	2913	2910	2181	2050	2159	1887	3122	1460	2264	3641	1996
380	22.156	255.233	Palmitic acid	[M-H]-	TRUE	255.232	C16H32O2	TRUE	TRUE	TRUE	85.4	83.7	77	255.23311:349337 256.23646:79624 257.23982:10454	120.42774:19 192.42686:19 201.82715:93 219.84966:56 225.21643:19 235.20592:38 237.21896:648 238.22217:38 253.49948:38 254.42618:376 254.59956:74 254.97804:122 255.12006:180 255.23279:68277 255.40419:805 255.50345:1418 255.54405:79 255.63657:1198	156264	364490	210134	255899	242867	322394	349337	327220	294144	299501	303819	289394	318330	284467	293237	283339	278860	275314	336585	302677	310462	366019	279196
469	23.131	281.249	Oleic acid	[M-H]-	TRUE	281.249	C18H34O2	TRUE	TRUE	TRUE	83.9	83.8	77.1	281.24905:36553 282.2524:7092 283.25576:1341	137.1032:19 185.0208:19 208.83717:19 237.99823:56 280.35812:74 281.07465:42 281.22849:55 281.24741:5071 281.42734:61 281.55048:74	100258	88441	86228	93234	82403	44683	33251	35979	32491	32199	31637	33223	31517	30252	27448	29634	26814	38042	36553	25151	27680	34192	25096
2940	8.429	493.132	Oenin	[M]+	TRUE	493.135	C23H25O12	TRUE	TRUE	TRUE	82.8	89.8	71.5	493.13797:1822 494.14132:852 495.14468:333	315.04764:31 316.06064:25 331.08063:371	838	1145	1174	1589	1822	470	498	444	690	715	1007	1954	1522	1603	1513	1911	1534	732	711	726	787	687	524
2148	8.466	393.211	Octaethylene glycol	[M+Na]+	TRUE	393.209	C16H34O9	TRUE	TRUE	TRUE	86.4	88	82.1	393.20874:1111 394.21209:266 395.21545:109	393.21033:260 393.23831:74	714	984	779	821	888	555	389	1103	670	474	1006	937	539	638	6355	2075	1207	1282	634	540	1111	504	1303
484	24.666	283.264	octadecanoic acid	[M-H]-	TRUE	283.263	C18H36O2	TRUE	TRUE	TRUE	84.9	86.1	70.9	283.26166:243678 284.26501:60886 285.26837:7719	240.07545:19 263.23407:56 265.25076:374 279.77673:19 282.35355:75 282.37015:320 282.961:68 283.07736:37 283.16284:153 283.2626:46634 283.40515:48 283.44318:2341 283.55249:290 283.69037:666	160266	241996	222450	220574	201091	308528	341676	282232	237193	267387	272282	248089	267695	245246	225264	247121	232248	234904	270138	257881	244984	325871	243678
1667	8.459	563.137	8-[3,4-Dihydroxy-5-(hydroxymethyl)oxolan-2-yl]-5,7-dihydroxy-2-(4-hydroxyphenyl)-6-[3,4,5-trihydroxy-6-(hydroxymethyl)oxan-2-yl]chromen-4-one	[M-H]-	TRUE	563.141	C26H28O14	TRUE	TRUE	TRUE	88.7	89.7	86	563.13916:13250 564.14251:4368 565.14587:801	297.07455:28 311.04544:19 311.06287:19 321.07449:9 325.07263:28 335.09616:9 342.95212:19 353.06519:318 355.07831:19 365.0733:37 379.08551:19 383.0751:234 395.07104:46 397.10193:9 411.77322:9 413.08603:65 423.84949:9 425.08243:19 442.00027:19 443.09888:488 451.09995:9 455.10477:56 463.16443:28 471.92932:19 473.10745:292 485.10013:28 503.11096:46 527.10559:28 545.12805:74 561.35144:37 562.87402:20 …	29485	28247	24560	23865	28658	3945	3598	4429	5644	4705	8175	11543	13250	15095	14333	11583	14032	5513	5292	6294	5318	5879	5487
2552	8.77	437.236	Nonaethylene glycol	[M+Na]+	TRUE	437.236	C18H38O10	TRUE	TRUE	TRUE	84.9	84.5	84.3	437.2334:1559 438.23675:615 439.24011:220	436.13144:13 437.23465:312	662	716	699	624	611	692	572	1269	785	519	972	836	443	661	7129	1804	1120	1320	616	490	1558	424	1559
300	1.051	124.038	Nicotinic acid	[M+H]+	TRUE	124.038	C6H5NO2	TRUE	TRUE	TRUE	81.2	77.5	78	124.03837:1075 125.04172:309 126.04508:0	78.04333:74 80.05383:37 83.85008:19 124.0433:37	449	1097	800	636	680	1133	279	272	89	473	560	380	577	700	603	821	1075	819	488	394	397	702	390
1490	1.017	335.064	Nicotinamide mononucleotide	[M+H]+	TRUE	335.064	C11H15N2O8P	TRUE	TRUE	TRUE	90.8	80.6	88	335.06366:4475 336.06701:2574 337.07037:0	80.05334:19 97.02824:56 97.03937:37 109.0489:19 123.05508:465 129.11568:19	852	1049	1061	1227	648	4475	860	1806	1785	1569	1778	1237	1584	1516	1298	2308	1717	2928	1279	1408	684	1914	1025
3705	10.328	609.173	Neodiosmin	[M+H]+	TRUE	609.182	C28H32O15	TRUE	TRUE	TRUE	84	76.7	90	609.17419:1404 610.17754:1402 611.1809:319	205.03131:19 286.04562:19 301.06821:337 383.14319:19 592.84424:19 609.18103:37	862	1003	759	931	855	1220	2401	1624	1597	1971	1401	3464	3698	4180	3091	3951	3612	899	1911	1226	1404	1999	900
1289	9.717	447.087	5,7-dihydroxy-2-[3-hydroxy-4-[(2S,3R,4S,5S,6R)-3,4,5-trihydroxy-6-(hydroxymethyl)oxan-2-yl]oxyphenyl]chromen-4-one	[M-H]-	TRUE	447.094	C21H20O11	TRUE	TRUE	TRUE	86.8	79.9	83.2	447.0957:1576 448.09905:0 449.10241:298	167.04109:19 284.03293:56 285.04474:413 285.06619:75 299.08682:19 327.04437:37 445.69394:19 447.09549:278 447.13129:56	1621	1576	1262	1455	1973	128	147	132	243	270	690	742	610	910	550	1180	1187	126	239	120	161	460	314
2341	17.005	415.209	6-[3-[(3,4-dimethoxyphenyl)methyl]-4-methoxy-2-(methoxymethyl)butyl]-4-methoxy-1,3-benzodioxole	[M-H2O+H]+	TRUE	415.211	C24H32O7	TRUE	TRUE	TRUE	88.2	88	78.7	415.21039:38438 416.21374:12429 417.2171:2339	55.05877:3 61.95153:3 65.03762:9 69.03941:15 73.06532:3 77.04417:15 81.03062:15 81.07383:3 83.39443:3 91.05981:65 93.06693:6 99.0467:6 103.05638:12 104.06044:19 105.0737:9 107.08281:34 109.99888:3 115.05351:50 117.06989:90 118.72052:40 118.79743:19 118.99752:10 119.08685:4268 119.20548:21 119.27484:12 119.28717:12 119.36118:15 119.54631:12 119.61269:9 119.77792:9 119.89999:9 120.24026:9 127.04196…	42986	41706	41029	37508	38438	33605	28529	25851	57721	67535	36284	92251	38150	25872	20698	17148	17206	25645	28995	55656	19677	29316	23335
2312	8.401	409.18	4-[4-(beta-D-glucopyranosyloxy)-2-hydroxy-2,6,6-trimethylcyclohexylidene]-3-Buten-2-one	[M+Na]+	TRUE	409.183	C19H30O8	TRUE	TRUE	TRUE	81.5	76.6	79.3	409.18124:1738 410.18459:469 411.18795:25	247.05887:19 293.12399:9 409.10144:28 409.17853:310	1738	1998	1879	1292	1488	550	410	430	540	560	665	412	383	409	817	455	410	579	397	301	423	362	465
3460	8.582	571.163	Sibiricose A1	[M+Na]+	TRUE	571.163	C23H32O15	TRUE	TRUE	TRUE	88.2	95.3	81.2	571.16272:1492 572.16607:556 573.16943:165	185.03757:11 203.05605:19 356.13199:4 391.09827:22 409.10822:171 571.16083:182	480	497	760	670	672	1906	1508	1732	1492	1202	1168	2033	2495	2036	2184	1401	1563	1234	1285	1075	960	1217	805
1457	10.503	491.118	Tricin 5-glucoside	[M-H]-	TRUE	491.12	C23H24O12	TRUE	TRUE	TRUE	83.1	70.2	81.8	491.1192:8174 492.12255:2773 493.12591:483	285.03903:37 299.01019:56 299.0224:74 313.02838:167 314.04303:111 327.04343:37 328.06009:394 329.06039:701 343.04422:56 359.90356:19 371.07684:37 461.0643:167 464.96078:38 475.08899:76 476.09857:636 480.69516:19 489.5892:61 491.11752:2325	31098	31866	31034	32340	33744	3338	4507	4229	5649	6212	8174	10081	11269	12835	10702	13188	12674	3019	5313	6096	4355	4405	4330
2499	16.987	432.239	7b,9-Dihydroxy-3-(hydroxymethyl)-1,1,6,8-tetramethyl-5-oxo-1,1a,1b,4,4a,5,7a,7b,8,9-decahydro-9ah-cyclopropa[3,4]benzo[1,2-e]azulen-9a-yl acetate	[M+ACN+H]+	TRUE	432.238	C22H30O6	TRUE	TRUE	TRUE	81.3	79.6	73.8	432.23709:16037 433.24044:5516 434.2438:1034	69.0332:19 69.04024:28 85.04559:19 87.06071:9 103.06016:19 107.08518:56 111.04299:28 117.0693:28 118.71838:28 118.81067:38 119.08469:1035 127.03654:19 127.04449:9 129.05544:74 133.06444:37 135.08127:528 135.10095:74 147.06056:56 150.70834:9 171.13023:19 279.15054:9 281.13269:37 398.2724:9 415.2095:56	21393	15148	15134	16037	14995	12711	9660	8980	23698	26538	13144	32846	12991	8566	7339	7215	5803	9528	9367	18724	7211	10662	8289
3156	9.301	525.286	4,4,8,10,14-Pentamethyl-17-(4,5,6-trihydroxy-6-methylheptan-2-yl)-2,5,6,7,9,15-hexahydro-1H-cyclopenta[a]phenanthrene-3,16-dione	[M+K]+	TRUE	525.296	C30H46O5	TRUE	TRUE	TRUE	80.1	77.5	82.6	525.2915:1243 526.29485:659 527.29821:105	433.11331:19 525.17334:38 525.28979:394	728	835	854	801	827	466	420	1026	701	454	730	973	612	724	7709	2096	961	1009	638	544	1065	403	1243
3232	9.378	535.14	5,7-Dihydroxy-2-(4-hydroxyphenyl)-6,8-bis(3,4,5-trihydroxyoxan-2-yl)chromen-4-one;hexane;pentane	[M+H]+	TRUE	535.144	C25H26O13	TRUE	TRUE	TRUE	87.2	92.3	76	535.14417:203391 536.14752:77013 537.15088:19496	119.06541:19 121.03261:46 123.0128:9 130.04907:9 137.0182:9 175.03635:28 189.01378:19 199.03835:19 203.03299:28 213.06137:9 217.04599:9 227.02757:19 229.04611:19 241.05562:28 243.04964:28 255.03059:28 263.0704:9 268.06882:19 273.05127:19 279.06674:37 281.0415:19 283.05408:46 284.07138:19 293.0773:19 294.05194:65 295.05972:605 297.04395:28 297.08289:28 304.0719:19 305.07449:19 306.09604:19 306.288…	171451	208830	180905	206540	203391	89124	102731	78147	73263	89106	91075	122614	150339	140427	130834	111349	110961	74464	82860	84773	69121	70924	62440
1899	8.106	369.117	4-O-feruloyl-D-quinic acid	[M+H]+	TRUE	369.118	C17H20O9	TRUE	TRUE	TRUE	86.8	88.7	86.5	369.11636:7459 370.11971:2148 371.12307:1974	89.03963:19 107.04796:9 117.03526:102 134.03671:19 145.02769:576 148.04871:9 149.05688:65 149.07928:19 158.87637:9 176.52473:37 177.04462:49 177.054:1117 191.04433:9 205.19234:9 207.06288:65	3034	4002	3895	4443	4492	6334	5679	6033	5672	7065	6537	7845	7459	8903	11566	9739	9016	5900	6588	4646	6105	7450	5416
2344	16.972	415.212	Gelomulide N	[M-H2O+H]+	TRUE	415.211	C24H32O7	TRUE	TRUE	TRUE	85.2	80.1	74.6	415.21106:69797 416.21441:24534 417.21777:4777	69.85109:19 91.05377:93 93.07178:19 103.05319:37 105.07777:19 107.08698:56 111.04494:19 115.05352:186 115.06866:56 117.07149:167 117.63115:19 118.71602:77 118.79447:82 119.08697:7241 119.2056:64 119.27343:37 119.36286:56 119.54491:74 119.64524:56 119.97125:56 129.06133:37 133.06566:130 133.61169:19 135.07928:149 333.13489:19	43796	38877	40460	39687	38507	33035	28529	27300	69797	70347	36880	95794	38150	26744	24073	20996	19356	25699	25540	55563	21285	30449	24018
1674	23.095	348.306	2,3-dihydroxypropyl hexadecanoate	[M+NH4]+	TRUE	348.31	C19H38O4	TRUE	TRUE	TRUE	82.6	82.2	78.2	348.30829:13110 349.31164:3118 350.315:2037	57.07334:56 65.0537:19 67.0578:37 69.08057:19 71.08461:74 71.10127:74 71.60562:19 81.0675:37 81.08783:19 83.09695:19 85.09939:56 85.11241:74 89.06121:19 95.08346:74 95.10272:19 97.1161:19 109.09602:37 109.7649:19 123.11102:37 123.11885:37 127.14983:37 137.14659:56 139.1507:19 159.13731:19 239.23015:149 257.24084:74 313.26785:392	13132	12806	13110	11183	15316	18003	17025	13220	8474	6048	5531	18030	13684	10465	7165	6110	4652	11615	16757	11264	7868	11037	5301
1676	23.003	348.308	1-Palmitoyl-rac-glycerol	[M+NH4]+	TRUE	348.311	C19H38O4	TRUE	TRUE	TRUE	84.6	83.1	82.8	348.3121:18127 349.31545:3437 350.31881:2239	55.05824:19 57.07161:121 57.08227:65 57.0908:37 67.05397:19 69.06972:19 71.08675:111 81.07014:65 83.08555:46 85.10225:65 95.09371:84 97.10011:28 109.10014:65 109.1134:19 123.1159:65 131.10878:9 137.13075:37 151.14505:19 213.01674:9 221.2196:28 239.23729:102 257.25342:74 313.27127:490 314.27142:19	14137	11386	11236	11933	14201	14930	15417	12934	7918	5835	4949	18366	17372	8849	7194	6322	3581	13103	18127	9162	4177	6493	5433
1670	8.643	563.14	Corymboside	[M-H]-	TRUE	563.141	C26H28O14	TRUE	TRUE	TRUE	90.1	87.1	87.5	563.13947:28404 564.14282:12553 565.14618:3162	149.0414:19 191.03575:56 219.07854:9 233.04243:19 234.75203:9 271.02438:19 281.06293:19 283.06357:37 295.04669:19 295.07095:19 297.07941:56 311.06784:28 323.05777:37 325.06244:56 334.01447:9 335.05222:37 337.06781:37 347.10223:9 351.04987:19 351.95483:28 353.06784:681 355.08627:37 365.05713:93 377.05469:19 379.08276:19 381.88266:19 383.07513:498 395.06824:28 397.08508:28 401.09174:19 407.08102:37…	38582	37731	36409	36022	37226	5968	9096	8979	7244	10343	14567	22048	28404	20778	23538	24789	25210	7172	12592	11498	8390	9788	7635
1290	8.761	447.09	2-(3,4-Dihydroxyphenyl)-5,7-dihydroxy-6-[3,4,5-trihydroxy-6-(hydroxymethyl)oxan-2-yl]chromen-4-one	[M-H]-	TRUE	447.094	C21H20O11	TRUE	TRUE	TRUE	89.8	85.3	92.7	447.09131:10321 448.09466:3380 449.09802:538	57.03936:3 59.0154:21 59.03167:11 62.05812:3 87.02444:3 104.23769:3 133.02675:11 149.02194:8 161.04538:13 164.01248:3 191.04259:8 213.4731:3 225.05455:8 225.16466:8 284.03116:24 285.04062:135 297.03821:146 298.04614:69 299.05331:50 299.08749:13 304.58994:3 311.05545:32 324.03006:11 325.03946:40 326.01477:11 326.04538:8 327.05026:1277 328.34564:8 339.05283:98 341.05954:16 351.04691:5 351.05219:11 …	10414	10321	10505	8090	10114	567	1115	916	852	1179	1347	4303	6475	5212	3724	6758	5748	648	1416	1033	724	1208	914
568	9.374	193.084	Myristicin	[M+H]+	TRUE	193.086	C11H12O3	TRUE	TRUE	TRUE	84.6	91.7	72.5	193.0845:1534 194.08785:300 195.09121:300	57.03486:9 79.0564:28 90.04961:9 91.06781:9 103.05955:28 105.07262:56 115.0527:37 118.04097:56 133.05992:19 133.06969:37 161.07816:19	807	1300	1177	1291	1185	1083	1165	1046	1256	1386	1534	1284	1627	1313	1757	1847	1922	1192	1288	1325	1057	1742	1313
422	12.484	271.059	Naringenin chalcone	[M-H]-	TRUE	271.061	C15H12O5	TRUE	TRUE	TRUE	95.2	91	97.7	271.05945:2925 272.0628:594 273.06616:119	59.01189:8 63.02003:5 63.02339:13 63.03459:8 63.10521:3 65.00632:27 65.0177:11 81.03761:3 83.01381:27 93.03535:24 107.01282:53 119.05215:249 120.05371:13 121.02686:8 125.02187:8 145.02676:11 151.00388:394 152.00975:16 161.06252:11 165.02008:21 165.03821:13 174.91689:3 177.0157:56 185.05582:8 187.04259:13 227.07466:16 229.05482:8 271.06003:93 271.08328:24	3018	2857	2454	2451	2925	46	96	53	105	14	19	277	587	732	441	740	601	245	248	146	216	291	281
423	12.532	271.066	Naringenin	[M-H]-	TRUE	271.061	C15H12O5	TRUE	TRUE	TRUE	86.7	88.4	93.9	271.06647:2671 272.06982:688 273.07318:172	59.50868:6 65.00426:25 83.0152:37 83.84026:6 93.02993:19 107.01419:68 119.04887:247 145.03143:13 150.53027:25 151.00165:624 152.00926:12 161.05835:25 165.01584:19 177.00934:19 177.01309:37 187.0321:19 187.03789:31 271.06064:99	2671	2798	2531	1869	2939	60	93	80	60	8	36	216	604	374	250	375	383	81	249	98	134	111	267
2331	7.484	413.14	N6-Threonylcarbamoyladenosine	[M+H]+	TRUE	413.142	C15H20N6O8	TRUE	TRUE	TRUE	82	84.5	77.2	413.14465:1380 414.148:539 415.15136:147	120.06223:12 136.06299:77 162.04082:118 281.10043:65	990	1273	1325	1654	1380	791	721	636	608	806	606	551	657	708	631	607	656	738	602	563	546	694	557
713	14.75	230.248	N,N-Dimethyldodecylamine N-oxide	[M+H]+	TRUE	230.248	C14H31NO	TRUE	TRUE	TRUE	85.7	73.5	75.3	230.24777:13532 231.25112:3547 232.25448:226	57.07274:93 58.06771:19 62.07126:93 71.08913:37 212.2357:149 212.5381:19 230.24843:531	79	13	64	145	135	8481	2423	2630	2468	1073	1238	13532	3587	3208	1225	922	1535	2896	3033	1273	1172	5788	1474
320	19.359	227.197	Myristic acid	[M-H]-	TRUE	227.202	C14H28O2	TRUE	TRUE	TRUE	83.1	85.7	75.9	227.19739:8570 228.20074:1945 229.2041:0	85.02682:9 209.18738:19 224.67616:9 227.20076:687	7014	8570	9095	9745	10034	2520	3857	2889	2411	3849	3464	2451	4062	3058	2766	3348	3501	2520	3643	3464	2867	4749	3462
3171	1.012	527.158	Melezitose	[M+Na]+	TRUE	527.158	C18H32O16	TRUE	TRUE	TRUE	86.7	88.5	79.1	527.15845:15034 528.1618:4293 529.16516:3005	185.03896:186 185.062:37 203.04878:111 265.09537:19 274.61105:37 277.19711:19 335.07367:19 347.09338:518 348.04865:19 363.94449:37 364.21112:38 365.1033:1269 365.82648:21 425.12518:19 525.49011:56 525.76514:37 527.16101:2977	10189	10497	9771	15034	13107	12438	6991	6310	6668	7336	5699	6371	6465	7609	7648	8338	10340	9286	4848	5073	4296	8277	5928
3958	9.017	655.183	Malvin	[M]+	TRUE	655.187	C29H35O17	TRUE	TRUE	TRUE	87.5	81.7	90.9	655.18329:1429 656.18664:668 657.19:147	287.10138:19 331.06683:38 331.07968:395 491.91702:19 493.12933:111 655.18109:111 655.27869:37	1113	1147	1283	1429	1342	243	257	199	176	362	277	559	418	380	398	285	262	315	231	246	226	150	106
1601	1.036	343.122	Maltose	[M+H]+	TRUE	343.123	C12H22O11	TRUE	TRUE	TRUE	83.5	76.5	81.1	343.12442:9898 344.12777:2145 345.13113:0	61.03569:19 69.03204:37 73.0349:19 81.04829:37 85.03035:241 91.0464:19 97.03155:74 99.04552:37 101.16108:19 109.0303:56 123.04629:19 127.038:260 145.04791:241 148.44208:19 163.05766:56 163.07748:37	12763	12921	16554	18308	15770	13990	6367	6174	5433	7622	7081	6357	6654	4859	7488	6566	8333	9898	6096	5683	5218	7257	7017
127	0.762	115.005	Maleic acid	[M-H]-	TRUE	115.004	C4H4O4	TRUE	TRUE	TRUE	86.1	75	75	115.004:15567 116.00735:1098 117.01071:793	71.01592:74	18468	15567	16477	16932	16955	30061	30233	37958	36760	35468	34216	26746	34190	36528	34218	37164	36172	26893	30228	30388	32662	32696	31428
160	0.761	133.016	Malic Acid	[M-H]-	TRUE	133.014	C4H6O5	TRUE	TRUE	TRUE	92.5	93.3	93.3	133.01459:82474 134.01794:5013 135.0213:1652	59.01676:167 59.03628:56 60.57416:19 71.01611:2551 71.04823:128 71.172:37 72.99701:836 73.02836:68 77.65375:19 87.01958:56 89.02435:130 89.04433:56 114.64477:37 115.00471:902 119.26641:19 133.01106:111 133.03386:56	82474	79436	78932	76047	84873	136841	137737	168102	155939	158073	147551	114750	148082	145435	148647	155314	142055	120984	135866	137628	140063	136901	130950
1635	24.802	346.308	Macamide B	[M+H]+	TRUE	346.31	C23H39NO	TRUE	TRUE	TRUE	83.2	76.9	79.7	346.30771:6053 347.31106:1850 348.31442:457	72.776:19 84.08708:19 85.10625:38 91.05629:229 92.70157:19 113.13098:19 346.30933:356	3600	4150	3535	4547	4201	2874	6053	4956	4879	3521	3459	4180	4732	4762	4158	3260	2382	4474	4990	5080	3570	4237	4245
241	1.848	180.066	L-Tyrosine	[M-H]-	TRUE	180.067	C9H11NO3	TRUE	TRUE	TRUE	87.6	74.8	92.5	180.06564:1248 181.06899:92 182.07235:0	59.01947:5 61.99896:3 72.00984:13 72.02062:8 73.84065:3 93.03802:16 119.05205:42 121.30175:3 134.0744:5 163.03873:24 163.05495:5 165.06525:3 180.06313:13	759	424	553	429	713	1005	706	877	568	773	761	973	1248	1273	1014	1373	1264	1149	834	1044	689	1288	1144
614	7.132	205.095	L-Tryptophan	[M+H]+	TRUE	205.097	C11H12N2O2	TRUE	TRUE	TRUE	95.2	91.2	96.6	205.09846:5511 206.10181:993 207.10517:157	55.93715:3 57.08101:3 65.03831:3 65.0406:7 73.80058:3 74.02509:7 75.35112:1 81.06882:3 90.04475:3 91.05486:37 93.03612:3 103.0544:7 105.06742:3 107.08239:3 114.70235:4 115.05487:120 116.04722:7 117.05758:103 117.06827:60 117.70142:10 117.77801:6 117.81171:3 117.92818:3 118.05392:12 118.06465:653 119.05601:4 119.51852:3 121.02787:23 126.04343:3 127.05334:40 128.04973:13 128.07848:3 129.65846:3 130…	497	585	692	800	849	3377	4030	5554	5164	5511	4004	4166	5308	7773	7700	8310	7054	5517	5159	4990	5969	7442	5199
1396	17.962	476.278	LPE 18:2	[M-H]-	TRUE	476.276	C23H44NO7P	TRUE	TRUE	TRUE	87	89.8	82.3	476.27838:2871 477.28173:435 478.28509:435	152.9998:19 181.95844:9 196.03723:74 197.91512:9 214.05266:46 273.92099:9 278.3891:38 279.23279:887 418.02722:19 476.27606:309	2494	2244	2649	3068	2871	2896	3965	2986	3682	4220	3905	2055	2388	2798	2320	2124	2618	2357	2148	1503	2001	3090	2100
1313	18.546	452.278	LPE 16:0	[M-H]-	TRUE	452.277	C21H44NO7P	TRUE	TRUE	TRUE	85.8	93.1	74.9	452.27374:2016 453.27709:992 454.28045:0	153.00748:19 176.07867:6 196.03983:80 209.96367:6 214.04912:25 216.57785:6 255.23213:778 452.28287:186	2922	2943	2559	2901	2245	3821	1997	2245	1782	2394	2000	1128	2086	2016	2056	1928	1794	4067	2129	1234	1769	2585	1874
3099	17.232	518.322	LPC 18:3	[M+H]+	TRUE	518.326	C26H48NO7P	TRUE	TRUE	TRUE	85.3	85.6	82.2	518.32458:5005 519.32793:1876 520.33129:420	85.03368:3 86.09653:11 104.10782:80 125.00149:19 163.02696:3 184.07317:438 256.19785:3 258.11282:16 330.20145:3 335.25833:13 500.31241:80 518.32318:215	4319	3681	3937	4258	4135	5054	5005	4486	4048	5110	4007	2224	2673	3224	1923	2157	2125	3850	2840	2233	3228	2770	2105
3118	18.125	520.339	LPC 18:2	[M+H]+	TRUE	520.341	C26H50NO7P	TRUE	TRUE	TRUE	87.5	81.1	85.1	520.33917:27537 521.34252:9784 522.34588:2188	60.08474:19 71.08706:9 86.09645:84 103.81273:28 104.10921:365 125.00307:102 149.1479:9 164.3671:9 181.02565:19 183.49539:37 183.6369:30 184.0733:2258 184.29935:19 184.40668:28 184.63486:28 185.10315:19 186.30347:28 194.97783:9 249.18626:9 258.1109:56 332.68185:9 337.2753:74 443.25375:46 501.03046:19 502.3299:455 518.69073:19 520.34125:1393	14352	13428	13963	14611	14210	31080	27537	26167	27239	25866	23002	12970	15264	22410	14367	13986	13512	21831	17177	12959	19877	18123	13049
3139	19.284	522.357	LPC 18:1	[M+H]+	TRUE	522.356	C26H52NO7P	TRUE	TRUE	TRUE	86.8	82	82.9	522.35577:12482 523.35912:4156 524.36248:954	86.10033:28 104.1091:186 104.12063:37 121.12117:9 125.00132:28 166.0596:28 184.07295:1019 184.62108:10 258.11258:28 339.28909:28 416.04523:9 502.68597:9 504.3457:167 520.97748:19 522.35413:588	3080	3273	3351	3909	3955	13333	12482	12387	10972	11304	8356	4045	5840	7780	4978	5210	4686	9421	4820	3354	6086	6068	5116
2963	18.79	496.338	LPC 16:0	[M+H]+	TRUE	496.34	C24H50NO7P	TRUE	TRUE	TRUE	86.2	82.7	80.5	496.33908:12551 497.34243:4382 498.34579:967	86.10243:33 86.11422:14 104.10722:281 123.1237:5 125.00096:33 166.06128:23 184.07292:1101 258.10623:37 313.27252:37 419.25766:14 462.35696:5 478.30573:23 478.32733:200 496.34091:539	10162	10039	10877	11657	12324	18384	13616	11975	13793	11931	8230	11398	13729	15100	11374	12279	11520	17815	12500	10385	12551	15077	9664
458	21.131	279.236	Linoleic acid	[M-H]-	TRUE	279.233	C18H32O2	TRUE	TRUE	TRUE	85.5	83.5	81.6	279.23578:63105 280.23913:11903 281.24249:2757	59.01183:28 59.01617:46 261.21396:19 261.22308:102 265.09937:9 276.99817:19 278.34109:46 278.53421:19 279.09039:22 279.20123:45 279.23425:7092 279.41351:162 279.53384:93 279.64951:46	43737	63105	61716	61789	58250	30390	35191	32916	32630	33796	31416	44325	54857	54563	45213	51830	48867	27579	31668	22521	22012	31144	20569
148	1.881	130.086	Leucine	[M-H]-	TRUE	130.087	C6H13NO2	TRUE	TRUE	TRUE	84.6	88	75.1	130.08865:2195 131.092:0 132.09536:0	130.08478:7 130.09283:10	769	396	670	643	767	1236	1009	1083	555	861	772	1432	1515	2195	1923	1943	2394	1978	1574	1534	1271	1774	1290
907	14.639	274.273	Lauryldiethanolamine	[M+H]+	TRUE	274.274	C16H35NO2	TRUE	TRUE	TRUE	94.5	90.4	90.9	274.2728:56798 275.27615:13825 276.27951:1612	55.0561:4 56.90213:4 56.93621:4 57.0737:229 58.06653:16 60.04615:7 60.0549:3 62.06229:16 68.05053:6 69.07088:6 69.85322:6 69.90514:3 69.93346:3 70.06574:352 70.87032:6 71.08794:106 72.08039:4 72.09477:3 74.06042:3 81.0689:3 83.08558:4 84.08315:3 85.10359:39 86.06077:7 88.07729:573 88.18197:4 88.78213:4 89.08031:6 89.23225:3 101.77304:4 101.84425:4 102.09227:265 103.09309:4 104.07143:6 105.76452:6…	80	68	122	108	496	65508	55401	65523	56798	34182	36763	78787	69114	62701	38400	35536	41997	63637	64432	55467	47081	62082	41096
3700	25.409	607.293	lappaconitine	[M+Na]+	TRUE	607.29	C32H44N2O8	TRUE	TRUE	TRUE	84.7	70.7	75	607.2901:13763 608.29345:8422 609.29681:1835	351.24945:5 417.20731:8 433.23923:16 434.25052:8 445.19641:8 446.20367:11 447.21207:11 459.211:19 460.21884:32 461.2308:40 473.24316:11 487.259:5 491.20544:5 492.25092:13 505.21317:11 511.96823:3 519.24408:16 520.24811:24 532.242:8 547.26813:282 548.27246:27 575.25305:27 578.23621:8 579.29572:11 589.47125:8 592.2608:8 605.36584:37 605.7132:13 605.73755:13 605.77924:11 606.01202:8 606.80804:6 607.…	113832	161639	138349	178412	167347	2985	8291	9933	8931	8700	8311	3830	11170	15208	13763	12670	9475	16974	9964	18155	13247	1186	8658
147	0.741	129.022	Itaconic acid	[M-H]-	TRUE	129.019	C5H6O4	TRUE	TRUE	TRUE	85.6	88	78.4	129.01933:2027 130.02268:183 131.02604:0	85.03191:37	1987	1794	1780	2027	2272	3067	3054	3792	3722	3315	3557	2518	2843	3537	3325	3929	3611	2510	2944	3150	3503	2999	3195
2518	9.512	433.113	Isovitexin	[M+H]+	TRUE	433.113	C21H20O10	TRUE	TRUE	TRUE	85.8	79.4	86.2	433.10944:4382 434.11279:1062 435.11615:236	177.07283:19 185.08629:56 251.08463:19 271.05594:37 281.08197:19 283.06152:297 283.07816:111 307.05618:37 309.0704:37 311.05887:19 313.0737:279 321.07156:19 323.09058:56 333.05908:19 337.07178:167 340.03003:19 349.07996:56 355.103:19 361.07565:74 364.85944:19 367.08456:93 367.12244:19 379.0835:111 397.09064:74 403.13297:19 415.10999:37 416.75665:19	894	1149	1376	1270	1409	858	799	708	774	891	776	3877	4281	4313	4382	4105	4588	2209	1965	1996	1995	1896	1724
2638	8.921	449.107	Homoorientin	[M+H]+	TRUE	449.108	C21H20O11	TRUE	TRUE	TRUE	92.9	87.4	93.4	449.10638:10010 450.10973:3313 451.11309:697	86.09748:9 165.01543:37 177.06853:19 283.06064:28 287.05255:84 297.07794:28 298.13721:28 299.05435:696 300.06091:28 311.05292:56 313.06522:19 321.07559:19 323.05658:19 325.02075:28 325.06912:149 325.09964:37 327.06235:19 329.06171:565 337.06812:19 337.08627:19 339.08478:176 349.0683:46 351.96475:19 353.05136:47 353.06461:312 365.06595:149 367.078:56 377.06226:195 377.08966:65 383.0751:130 395.075…	9475	11423	11557	14614	15000	1564	2122	1657	1935	2581	2872	9392	9017	13597	12169	13229	10010	1875	2443	2377	2137	2891	1840
419	23.505	269.247	Heptadecanoic acid	[M-H]-	TRUE	269.248	C17H34O2	TRUE	TRUE	TRUE	84.3	86.3	75.4	269.24786:4279 270.25121:1144 271.25457:229	125.92856:37 251.23778:38 269.24979:848	5143	7264	5735	6577	6177	4722	5198	4138	3646	3447	4279	3481	4550	4750	2869	3376	3894	3573	5094	3953	4115	5829	3185
1218	1.642	308.089	Glutathione	[M+H]+	TRUE	308.091	C10H17N3O6S	TRUE	TRUE	TRUE	80.6	80	76	308.08746:1751 309.09081:200 310.09417:210	58.99541:12 76.02316:56 76.04039:19 80.04797:6 116.01861:37 130.05281:19 136.04749:6 142.03421:19 144.01268:25 158.95802:6 162.01944:43 170.0602:6 179.04662:19 179.99983:19 187.05392:12 231.0461:6	116	144	141	144	146	358	101	171	135	91	81	1444	549	947	2208	1751	1119	1336	1195	1174	1114	1261	1191
398	0.901	147.076	Glutamine	[M+H]+	TRUE	147.076	C5H10N2O3	TRUE	TRUE	TRUE	88.2	80.9	83.9	147.07594:7559 148.07929:7449 149.08265:1066	56.05358:376 59.05821:19 82.07585:19 84.04538:1081 84.08679:72 85.02783:37 97.01495:19 102.0533:37 111.00992:19 130.04837:93	4176	5233	5603	5186	5566	4157	1860	2062	1875	1430	1310	2911	2940	3339	3139	3068	2807	7559	5294	4236	4580	5074	3275
401	0.916	148.058	Glutamic acid	[M+H]+	TRUE	148.06	C5H9NO4	TRUE	TRUE	TRUE	89.7	85.1	85.8	148.06027:15048 149.06362:1626 150.06698:278	53.38124:38 56.05293:389 58.99784:19 68.053:19 72.93618:19 84.04652:2201 84.55454:37 85.03156:93 85.04978:56 102.05415:93	12325	14168	14117	15048	14879	11537	6885	6507	6258	5748	5630	10181	10260	11126	10343	9820	9622	17626	11179	10280	10135	10417	8288
831	1.038	261.035	Glucose-6-phosphate	[M+H]+	TRUE	261.037	C6H13O9P	TRUE	TRUE	TRUE	80.3	63.7	85	261.03232:7657 262.03567:860 263.03903:860	55.01926:19 61.04095:37 63.19582:19 81.03526:56 81.05433:19 85.03001:167 95.00488:19 97.02839:74 98.97771:132 98.98193:326 109.02988:74 115.03849:37 125.10711:19 127.03912:93	2442	3485	3217	3818	3030	7657	4027	3391	4264	5001	3986	3220	4771	3438	3776	3672	4932	8412	3880	4817	4517	3895	3978
3098	24.108	829.514	Ginsenoside F2	[M+FA-H]-	TRUE	829.495	C42H72O13	TRUE	TRUE	TRUE	81.7	70.6	74.7	829.5025:53752 830.50585:38197 831.50921:34002	149.01373:37 206.99272:19 225.00218:186 250.06119:19 255.22992:56 277.23434:37 279.25668:37 349.23599:19 409.22827:37 415.23172:37 549.71393:19 551.29681:74 559.2489:111 667.3045:19 671.46735:204 744.47095:37 744.51331:37 752.48712:19 755.53723:37 764.06506:38 766.50928:357 766.55615:56 768.55432:56 769.59546:283 779.55316:19 783.4751:93 791.48755:130 824.64203:38 826.82806:94 826.86865:282 826.9…	319576	302275	296776	291931	295781	33587	37017	37954	37094	50569	61565	64770	64418	64394	56177	59662	53752	39942	70205	60564	50455	58629	50074
1718	8.214	579.135	Flavone base + 4O, C-Pen, C-Hex	[M-H]-	TRUE	579.135	C26H28O15	TRUE	TRUE	TRUE	85.2	86.6	70	579.13452:51508 580.13787:18263 581.14123:5954	205.05048:8 245.05225:13 297.05243:8 298.04575:16 299.05783:11 309.03714:8 312.05914:16 313.06723:19 323.07529:8 325.06982:8 327.04498:53 339.04498:72 341.0647:29 351.04694:11 351.08395:11 353.06223:19 357.06216:24 357.09149:11 367.04428:16 367.88843:8 369.01816:8 369.05612:1094 371.07077:11 381.05533:72 383.08032:24 393.05618:13 395.0791:19 397.04532:8 397.79095:13 397.81348:11 399.07001:1254 41…	47279	50085	51187	46772	52584	7216	13425	10539	14575	15096	22288	39152	51508	46752	40224	47207	41773	6662	18302	12236	11305	13271	8538
4493	9.331	787.206	Flavone base + 4O, C-Hex-FeruloylHex	[M+H]+	TRUE	787.209	C37H38O19	TRUE	TRUE	TRUE	82.3	80.8	75.5	787.20825:13442 788.2116:10330 789.21496:3016	117.03344:33 127.74023:4 145.02895:126 149.05984:7 165.02081:4 176.50534:22 177.05336:1471 178.05211:15 195.06416:33 286.05746:7 287.05148:45 297.09625:7 299.05807:97 299.07516:26 307.09851:4 311.04916:19 321.09448:145 325.06262:11 328.15955:8 329.06284:491 330.06476:15 339.10403:303 340.11075:7 353.06827:175 365.06149:15 367.07892:15 371.10056:7 377.06036:15 383.07593:178 387.75641:7 395.07028:1…	18814	26123	22278	26161	25157	10982	13442	9926	9958	8699	10832	35777	34384	32563	28430	31971	19026	11116	20000	12885	11035	14395	7925
1666	9.787	563.136	Flavone base + 3O, C-Pen-Hex	[M-H]-	TRUE	563.141	C26H28O14	TRUE	TRUE	TRUE	84.5	81.9	79.7	563.13843:21724 564.14178:12087 565.14514:1991	59.01431:56 59.02299:93 71.0134:37 87.00996:19 89.02528:93 95.01283:37 101.02208:37 101.04478:19 113.02094:56 119.03477:167 175.01276:19 183.04013:19 269.05569:19 282.04373:74 293.03812:599 293.07196:152 309.06229:19 311.05298:111 322.03366:37 323.05521:167 323.0755:74 327.12177:37 335.0495:37 339.98129:19 341.06216:148 341.09082:111 347.05728:19 353.07019:56 365.06479:56 381.87106:42 382.05862:3…	23453	25151	23085	21724	24519	3845	4451	4619	4878	5307	6909	5299	7281	7573	5500	7905	7137	2768	6497	4515	5802	5060	4604
4282	10.894	741.203	Flavone base + 3O, C-Pen-FeruloylHex	[M+H]+	TRUE	741.201	C36H36O17	TRUE	TRUE	TRUE	86.2	82.6	83	741.19788:21239 742.20123:9355 743.20459:2379	89.04165:8 103.50342:3 117.03162:64 117.04842:27 119.0483:5 127.03901:5 145.02547:311 147.04172:11 149.06154:24 176.49992:29 176.50929:27 176.60683:11 176.6256:11 177.05357:3107 177.19635:18 177.37302:8 177.62126:8 178.05611:21 178.28596:5 192.86273:3 195.06454:48 203.05228:3 232.07043:11 267.05902:5 271.05768:122 278.05798:3 281.07666:13 282.36078:5 283.05618:314 284.06165:8 293.07739:5 295.0550…	25875	30736	33142	36552	38634	19196	24949	20298	22896	20354	21239	30412	36506	35221	26273	31017	26014	16060	23924	20371	14231	14558	10977
4398	9.983	771.209	Flavone base + 3O, C-Hex-FeruloylHex	[M+H]+	TRUE	771.21	C37H38O18	TRUE	TRUE	TRUE	81.2	75.2	74.5	771.20782:9334 772.21117:5529 773.21453:840	91.06145:6 117.03452:31 119.05124:25 145.02534:105 147.0433:142 147.06384:31 176.51485:19 177.05348:892 193.08426:6 271.06006:50 283.061:93 291.08722:37 295.05511:12 297.11725:6 309.09473:43 312.07993:19 313.07068:310 321.09634:93 331.08051:31 337.07385:124 339.10873:192 343.08179:105 349.06363:12 361.05905:19 364.11517:6 367.08408:161 379.06381:19 379.08029:99 397.09018:142 409.08627:31 413.8048…	12530	12192	14612	14717	10884	4699	5176	3785	4364	4149	4584	13772	10098	11028	9334	7442	6914	4666	6747	5253	4616	4977	2323
4413	11.567	775.206	Flavone base + 3O, 2MeO, O-MalonylHex, O-guaiacylglycerol	[M+H]+	TRUE	775.208	C36H38O19	TRUE	TRUE	TRUE	89	89.7	84.1	775.20581:6701 776.20916:2995 777.21252:1032	105.43201:1 151.07066:3 153.01485:6 161.06456:3 179.06706:11 207.07077:3 241.04761:3 258.04797:3 270.05505:7 284.05975:3 286.04736:4 287.04855:4 300.05692:3 309.87003:1 312.06052:3 313.06873:4 314.06357:3 315.04996:51 316.05798:13 329.0654:43 330.04428:9 330.06992:14 330.93216:6 331.0426:7 331.07855:1142 331.35858:4 331.40482:6 331.43051:3 331.84183:4 332.07843:13 332.10416:7 332.31256:3 333.3942…	9095	10517	11757	13108	13801	5312	5865	4416	5285	5079	5942	15371	15758	14934	14415	12096	10655	11103	12609	11770	10403	9038	6701
2027	7.379	681.128	Flavone base + 3O, 2MeO, O-HexA-HexA	[M-H]-	TRUE	681.132	C29H30O19	TRUE	TRUE	TRUE	85.2	79.3	76.4	681.13135:25951 682.1347:12944 683.13806:3430	59.03506:19 71.01478:37 83.02307:19 89.03754:19 99.02225:19 113.02432:223 113.03783:111 115.00459:37 131.03409:74 149.05353:19 157.01288:111 157.04471:19 163.03308:19 175.02278:453 176.21985:38 177.29318:38 186.99948:38 192.43878:38 193.0325:679 194.24037:37 230.44646:19 235.05438:74 263.03458:37 275.04193:37 287.11398:19 289.0592:167 289.0784:74 300.04153:19 307.07684:37 314.05612:38 315.04489:3…	7546	5867	7237	6228	7936	16307	21475	19682	16924	24091	25951	38589	48517	30505	45443	52840	46328	15536	29846	27528	18430	22499	22476
3992	9.634	669.166	Flavone base + 3O, 2MeO, O-Hex, O-HexA	[M+H]+	TRUE	669.167	C29H32O18	TRUE	TRUE	TRUE	87.5	85	83.1	669.16364:10293 670.16699:4349 671.17035:1526	95.01547:9 141.03143:9 257.03485:9 270.04514:28 315.03391:28 315.05145:102 315.064:28 316.04691:28 330.04312:37 330.97211:23 331.07996:4391 331.27777:68 331.83035:37 332.0824:56 333.06317:19 489.09949:19 493.1286:102 507.11896:19 649.86676:9 667.49109:28 669.07843:29 669.15875:755	9468	12219	11352	13576	14063	13538	12150	12343	10293	9907	10904	21612	21276	18436	19477	15886	12689	13894	14523	10512	14462	11271	8750
4095	11.105	689.205	Flavone base + 3O, 2MeO, O-guaiacylglyceryl-Hex	[M+H]+	TRUE	689.209	C33H36O16	TRUE	TRUE	TRUE	87.3	88.3	85.5	689.20941:20444 690.21276:14498 691.21612:4231	204.86084:19 270.05292:37 287.0535:37 315.04758:111 316.0556:56 329.06293:56 330.04437:56 330.25214:97 331.08124:4321 331.28159:58 331.82391:56 332.07852:111 491.12701:19 493.13113:149 525.4931:56 525.52869:37 527.15765:3552 527.40399:43 528.15955:74 528.18225:93 528.2666:37 616.92694:19 680.5155:37 687.57806:40 689.20764:1631	30125	35636	33666	37796	39418	6825	9007	6489	8465	9115	10267	25316	26870	23166	23772	20444	18483	13258	15389	13864	13325	11639	7600
3170	13.422	527.156	Flavone base + 3O, 2MeO, O-guaiacylglycerol	[M+H]+	TRUE	527.155	C27H26O11	TRUE	TRUE	TRUE	83.7	87.2	75.5	527.15448:21936 528.15783:8047 529.16119:2377	155.37717:19 177.05464:93 247.06169:19 270.05081:111 287.05121:56 301.02121:19 315.04996:204 316.05045:56 330.05695:56 330.46481:42 331.08096:2980 331.39182:37 331.8288:37 335.03781:37 527.15222:186	9539	10157	10941	12287	12598	5702	6416	5881	7094	7523	7256	28264	30403	31808	35757	26955	25982	21514	21936	21699	14841	16733	12166
3944	9.428	653.133	Flavone base + 3O, 1MeO, O-HexA-HexA	[M+H]+	TRUE	653.134	C28H28O18	TRUE	TRUE	TRUE	83.4	76.5	78.7	653.13208:6379 654.13543:3724 655.13879:694	151.05016:19 189.01277:9 258.0528:28 286.0524:65 298.05307:9 300.13544:28 301.07031:1440 302.07782:28 477.10785:158 635.15833:19 651.59576:19 653.13525:509	1844	2025	2233	2539	2684	5925	5327	4273	4116	4540	4340	10356	8661	8691	5938	5456	6379	6482	5167	5464	4245	5549	3820
1334	9.655	461.107	Flavone base + 3O, 1MeO, O-Hex	[M-H]-	TRUE	461.109	C22H22O11	TRUE	TRUE	TRUE	86.4	87.4	85.3	461.10767:15194 462.11102:3833 463.11438:936	150.99655:19 240.04305:37 251.03198:19 268.03546:37 283.02344:56 284.03113:286 285.0358:56 298.04623:74 298.09985:56 298.12421:114 299.05588:3520 299.24384:54 299.37082:40 309.04761:19 313.03781:37 321.0925:19 339.99747:37 341.06534:204 444.6994:19 446.09045:56 459.92374:43 461.108:2973 461.28076:39	15760	15937	14885	16447	15194	1690	2032	2162	1645	2489	3709	3937	4904	4542	3849	4567	4513	1755	2952	2707	2164	2005	1784
1853	9.059	623.159	Flavone base + 3O, 1MeO, C-Hex-Hex	[M-H]-	TRUE	623.161	C28H32O16	TRUE	TRUE	TRUE	90.3	88.6	88.9	623.16138:12827 624.16473:5309 625.16809:1516	59.03047:28 71.01926:37 89.02657:56 101.02491:19 101.03059:19 113.02697:19 119.03636:84 131.03693:19 149.04622:28 158.92296:9 179.05614:19 191.3044:9 251.0441:9 299.07114:19 308.0416:37 312.08514:19 323.0408:28 323.0611:553 338.04092:19 341.06827:56 353.07376:74 353.09235:19 355.09222:19 365.07925:37 369.89801:19 371.07434:28 371.0961:28 381.103:9 383.07559:46 425.09143:19 441.7038:28 443.10498:1…	32802	30540	33306	29367	29776	2107	3244	2956	1419	3797	3476	11132	15804	11105	12827	15333	13533	1924	4669	3659	2658	3776	3048
4549	9.947	801.221	Flavone base + 3O, 1MeO, C-Hex-FeruloylHex	[M+H]+	TRUE	801.22	C38H40O19	TRUE	TRUE	TRUE	85.2	79.4	82	801.22113:16176 802.22448:16513 803.22784:4831	99.05021:19 117.03312:74 128.90088:19 134.04269:38 145.02548:321 149.065:19 176.63315:79 177.05176:2591 178.0524:37 183.05013:19 195.06068:56 301.0722:223 303.65436:19 312.07761:38 313.07336:339 320.06534:19 321.09399:279 325.06726:74 328.05942:37 336.15985:38 338.0466:38 339.10632:578 341.0665:56 343.06891:297 343.07675:1032 343.83014:37 352.04236:19 355.0708:19 363.09256:38 367.07617:514 372.35…	22487	26183	28613	32896	30560	9786	10868	8461	7887	7345	6906	33211	25192	30999	22962	17097	16176	7280	13773	7157	5710	8025	3017
1333	9.134	461.104	Flavone base + 3O, 1MeO, C-Hex	[M-H]-	TRUE	461.108	C22H22O11	TRUE	TRUE	TRUE	84.7	85.2	82.2	461.10464:10607 462.10799:3720 463.11135:1362	284.03024:19 297.04453:37 298.04758:130 301.15994:19 313.03149:281 341.06091:278 459.61414:40 459.94702:45 461.10709:3872 461.47992:37	9609	10607	11478	10662	10647	298	797	611	518	685	1039	2881	3296	3033	1752	3291	2604	431	1292	832	527	614	401
1277	11.555	314.137	feruloyltyramine	[M+H]+	TRUE	314.139	C18H19NO4	TRUE	TRUE	TRUE	84.3	85.5	81.2	314.13763:1195 315.14098:405 316.14434:18	117.0343:19 121.06305:50 145.0273:62 149.05635:12 177.05054:118 246.87013:6 279.9548:6	958	1195	1197	1283	1253	53	54	42	50	61	58	54	28	83	41	35	36	73	39	55	54	86	61
572	8.307	195.065	Ferulic acid	[M+H]+	TRUE	195.064	C10H10O4	TRUE	TRUE	TRUE	87.3	86.6	87.8	195.06406:1714 196.06741:190 197.07077:122	89.03934:62 105.03304:6 106.04231:25 110.0344:6 117.02733:19 117.03343:204 134.03313:50 135.04169:19 145.02567:124 145.04607:31 149.06:74 177.05367:37	841	1195	1182	1336	1274	1202	1330	1210	1227	1669	1795	1946	1922	2217	2423	2683	2286	1322	1714	1498	1236	1918	1230
595	13.749	311.22	FA 18:2+2O	[M-H]-	TRUE	311.221	C18H32O4	TRUE	TRUE	TRUE	84.5	77.3	86.5	311.2197:4756 312.22305:1019 313.22641:7134	123.07872:5 127.11351:9 139.10847:28 163.11411:37 165.12476:9 167.10757:14 167.14406:19 171.10132:37 177.12778:14 181.11725:9 182.13107:14 185.11081:9 191.14085:9 223.20236:9 249.22093:56 275.20819:23 293.21103:597 294.21002:19 311.22372:232	6041	5775	5181	5665	5617	4635	5016	4183	4112	4756	4954	3583	4491	3828	3644	4015	4184	4403	4928	4085	3690	4321	4197
528	16.624	297.242	FA 18:1+1O	[M-H]-	TRUE	297.244	C18H34O3	TRUE	TRUE	TRUE	89.7	77.4	90	297.24213:36126 298.24548:7264 299.24884:1060	99.10088:5 111.08363:19 113.09793:37 119.05379:14 127.11539:28 128.24934:5 139.11719:42 139.13383:14 141.12875:74 141.14719:19 155.10556:19 155.146:28 157.08585:144 167.10455:14 167.14104:42 167.16112:19 169.12306:60 171.10753:14 180.99455:19 183.00909:153 183.13705:402 184.01289:32 184.13736:19 185.11928:485 186.11922:19 197.15349:37 199.13628:56 199.95572:5 211.17159:19 213.14311:23 243.20952:1…	27199	35701	32571	44360	37478	35296	35378	38935	38048	34907	35497	34494	36060	33511	32824	35962	34179	34938	36126	34415	35051	35961	36157
294	10.379	213.153	FA 12:1+1O	[M-H]-	TRUE	213.149	C12H22O3	TRUE	TRUE	TRUE	81.9	74.3	77.5	213.14981:1302 214.15316:404 215.15652:0	177.9045:19 183.14207:74 195.13446:56 213.15038:74	1302	1230	1066	1436	1701	30	53	8	34	32	12	1	6	32	35	1	6	27	1	1	27	34	62
1537	26.13	338.341	Erucamide	[M+H]+	TRUE	338.342	C22H43NO	TRUE	TRUE	TRUE	87.9	83.4	84	338.34232:3726 339.34567:882 340.34903:238	53.04263:1 55.05579:9 57.07339:16 67.05709:4 69.07172:24 70.06895:3 71.0531:3 71.08761:10 72.0453:4 79.05657:4 81.0711:10 83.0878:26 85.10194:4 86.1115:3 93.07391:10 95.08653:14 96.80794:3 97.06505:6 97.1026:29 99.07938:3 100.07384:6 107.08199:3 107.08929:9 109.0984:7 111.08004:13 111.11872:14 114.09348:9 119.08328:3 121.1004:26 122.10751:3 123.11723:7 125.09388:7 128.10515:7 133.09924:3 135.1147…	7714	8595	8834	8716	9076	4243	5346	3608	4681	2890	2013	5082	4322	3726	2552	2701	2047	5312	3526	3575	2435	2878	1899
661	17.598	325.186	Dodecylbenzenesulfonic acid	[M-H]-	TRUE	325.184	C18H30O3S	TRUE	TRUE	TRUE	91.8	83.9	87.4	325.18478:23082 326.18813:6077 327.19149:1273	61.99812:9 116.98048:9 119.0473:46 170.00072:93 183.01193:2054 184.01955:65 197.02158:37 198.03918:28 212.04698:28 222.85847:9 225.05092:37 226.06415:37 239.0721:56 240.08357:19 249.04903:9 253.11935:19 261.21982:19 324.14288:65 325.06339:54 325.18301:8397 325.37393:260 325.47577:28 325.50122:121 325.63876:65	15892	20074	20241	23082	18590	26701	26443	28652	27294	22923	23152	25757	26405	27554	24783	22026	26614	24636	27474	26237	25796	24847	20814
404	0.768	259.026	D-Mannose-6-phosphate	[M-H]-	TRUE	259.022	C6H13O9P	TRUE	TRUE	TRUE	94.1	88	91.7	259.02127:5547 260.02462:708 261.02798:316	72.27374:19 78.95983:547 80.97037:19 95.01434:19 96.96964:763 131.05986:19 138.97704:111 198.99414:74 259.0238:93	2875	2403	2214	2385	2570	3417	3280	4055	4872	3764	3346	4767	4504	5887	5094	5547	4630	4480	5097	5856	6042	4669	4321
1814	10.295	607.171	Diosmin	[M-H]-	TRUE	607.169	C28H32O15	TRUE	TRUE	TRUE	88.3	75.5	87.7	607.17145:1396 608.1748:626 609.17816:0	299.05685:241 403.11664:19 443.1091:38 499.10291:19 507.23309:38 605.23981:38 607.172:661	135	319	218	159	222	280	336	312	459	435	444	968	1351	1396	1091	1263	876	330	482	441	378	314	252
1165	17.394	302.306	Dihydrosphingosine	[M+H]+	TRUE	302.305	C18H39NO2	TRUE	TRUE	TRUE	88.5	87.5	87.4	302.30612:6587 303.30947:1388 304.31283:190	57.06951:12 60.04832:130 67.05604:19 69.07646:25 81.06695:12 81.07203:19 95.08435:25 95.09536:19 109.10003:12 145.10213:19 240.26672:19 254.28444:118 254.30695:31 261.13657:6 266.2825:31 284.28503:25 284.29694:142 302.31165:25	6348	6324	6175	6587	6157	744	420	376	299	192	167	358	300	260	168	143	243	408	340	249	236	205	205
3884	10.374	639.189	Demethoxycentaureidin 7-O-rutinoside	[M+H]+	TRUE	639.192	C29H34O16	TRUE	TRUE	TRUE	86.2	70.7	83.8	639.18994:16561 640.19329:8534 641.19665:2277	177.04567:19 257.0394:19 270.04755:37 313.0481:37 315.04678:186 316.07739:56 318.13104:19 330.03845:74 330.2308:56 331.08298:5604 331.2782:151 331.41953:56 331.83853:74 332.08542:56 332.55118:37 397.11835:19 459.12198:19 493.13635:167 493.16458:37 593.08099:19 639.19379:322	6522	6681	7705	9805	7579	16411	19869	17721	13846	19043	16561	30254	25645	26733	23660	23705	21337	8993	11929	9417	11872	11683	9558
1504	1.005	503.155	D-(+)-Raffinose	[M-H]-	TRUE	503.161	C18H32O16	TRUE	TRUE	TRUE	90.4	73.9	96.3	503.16055:7946 504.1639:4548 505.16726:1451	59.01533:93 59.02942:37 71.01688:111 72.99778:19 87.00984:56 89.02649:461 99.0246:19 101.02335:148 101.0418:56 102.60843:19 107.03575:74 111.00867:19 113.02378:186 113.04179:56 117.07019:19 119.0346:391 119.0577:74 129.02968:19 131.03989:74 141.02209:19 143.0338:260 143.05237:37 149.04413:74 159.03465:56 159.08449:56 160.07938:74 161.04335:562 161.08633:38 162.7872:19 179.05748:1417 183.31491:19 …	9522	7501	7946	8395	7669	5584	5196	7696	3458	6876	5296	5982	6410	5073	6682	6452	6731	3659	6829	3932	3476	5038	3900
737	6.496	337.092	Coumaroyl quinic acid (isomer of 758, 759)	[M-H]-	TRUE	337.091	C16H18O8	TRUE	TRUE	TRUE	90.9	78.8	91.3	337.09192:4755 338.09527:1292 339.09863:152	118.04071:9 119.05187:186 120.05342:6 137.03516:9 155.03612:28 163.03978:778 170.66357:3 173.04483:37 173.05968:9 191.0544:74	4115	4755	4231	3907	4137	468	603	599	464	613	698	851	1308	1587	885	1420	1089	336	394	421	487	364	212
2517	9.774	433.111	Cosmosiin; Apigenin 7-O-glucoside	[M+H]+	TRUE	433.11	C21H20O10	TRUE	TRUE	TRUE	88	76	85.2	433.10785:4155 434.1112:1204 435.11456:308	81.03638:19 100.88332:19 153.05072:38 213.05907:19 249.07375:19 263.06754:39 271.05771:1139 271.6134:20 278.84442:19 283.07709:37 386.13766:19	4155	4957	5298	6244	5874	1468	1209	1268	1096	1808	2068	2326	2615	2586	3468	3070	2359	1708	1995	1747	1462	1641	1587
250	0.728	191.02	Citric acid	[M-H]-	TRUE	191.02	C6H8O7	TRUE	TRUE	TRUE	93.6	87.9	94.5	191.02002:155184 192.02337:16362 193.02673:4351	56.86108:40 57.03895:1475 57.07307:73 58.01095:74 59.01501:357 63.63652:19 66.81316:37 67.02098:2190 67.05565:123 67.16087:37 70.9929:19 72.99641:148 73.03017:251 73.0724:41 74.54323:19 83.01495:111 83.05096:19 84.78349:63 85.03189:3960 85.09307:131 85.13084:135 86.03439:56 86.74541:111 86.7625:37 86.8243:73 87.01247:9700 87.11124:603 87.17844:169 87.25357:60 87.32346:56 87.39734:111 87.40658:56 …	110597	104902	107364	100926	106459	132195	134728	155184	151954	152920	154075	141879	166366	164524	168889	169130	155376	128997	163459	157713	158237	155651	151258
1138	10.004	301.069	Chrysoeriol	[M+H]+	TRUE	301.071	C16H12O6	TRUE	TRUE	TRUE	94.6	88.7	93.1	301.07001:16362 302.07336:3500 303.07672:916	149.05856:19 218.86865:19 229.04533:74 233.08765:19 250.98386:19 258.05005:617 283.14081:19 285.14658:38 286.02917:43 286.04349:1754 287.05182:37 288.84579:38 300.12567:40 301.05316:101 301.06784:1809	16362	17539	19829	22464	19947	4069	4828	4881	6156	6634	8411	7920	8981	9643	10351	10913	9763	4975	6111	6330	5434	6631	5596
1660	18.578	347.219	Calycanthine	[M+H]+	TRUE	347.222	C22H26N4	TRUE	TRUE	TRUE	84.4	75	75	347.21878:5741 348.22213:1761 349.22549:289	347.21661:105	1727	1938	2518	2927	3096	2694	6561	5832	7195	6496	5831	2916	5528	6084	5741	4433	4913	5650	5370	5509	6234	3848	5920
408	16.014	265.149	Dodecyl sulfate	[M-H]-	TRUE	265.148	C12H26O4S	TRUE	TRUE	TRUE	90.4	81.3	85.8	265.14911:6244 266.15246:484 267.15582:242	79.95382:57 96.66703:40 96.95866:1184 102.30177:38 180.9621:19 221.21707:19 264.30307:39 265.14584:1612	4982	4182	4566	4718	4122	4241	3659	3977	3676	3102	3068	3485	5502	3570	3476	3279	3384	3159	4034	5018	3526	6244	3693
576	16.939	309.171	2-Dodecoxyethyl hydrogen sulfate	[M-H]-	TRUE	309.173	C14H30O5S	TRUE	TRUE	TRUE	92.2	85	87.7	309.17337:2093 310.17672:123 311.18008:32808	96.95467:19 96.96579:102 96.97274:46 122.97311:19 235.20515:9 291.1944:19 309.17358:603 309.20087:134	1574	2274	2394	2307	2176	2093	1810	2459	1554	1450	1661	1722	1383	1321	1158	1511	1774	1389	1991	1518	1364	2720	1588
617	2.377	315.069	Benzoic acid + 2O, O-Hex	[M-H]-	TRUE	315.071	C13H16O9	TRUE	TRUE	TRUE	87.2	76.4	81.6	315.06866:6409 316.07201:1054 317.07537:450	57.04965:1 59.01616:4 71.01213:3 71.0145:9 71.05733:1 81.03778:4 83.02302:4 85.02706:3 87.01156:3 91.03307:1 93.05066:3 99.00846:1 101.02696:9 107.69188:6 108.02023:300 109.03036:108 109.08343:4 113.02488:6 116.94469:4 121.0229:4 121.03066:11 122.03428:4 123.04359:14 133.02823:10 135.00694:6 137.02669:3 145.0278:3 149.06007:3 151.03795:21 151.05704:10 151.53793:10 152.01089:763 153.01839:240 153.…	6330	4155	5904	5198	5500	4272	4662	4787	3842	5462	4257	6409	8834	8595	8025	8870	7898	3394	5866	4134	4377	6041	5259
534	3.421	299.079	Benzoic acid + 1O, O-Hex	[M-H]-	TRUE	299.078	C13H16O8	TRUE	TRUE	TRUE	85.9	83.2	76.8	299.07574:1606 300.07909:202 301.08245:101	82.98788:3 89.02512:3 93.03513:66 137.02382:307 138.02852:8	2063	1742	1583	2172	1750	359	520	530	824	929	1122	1334	1992	2570	1809	1055	2098	1231	1606	1662	1194	941	1361
135	8.513	121.029	Benzoic acid	[M-H]-	TRUE	121.031	C7H6O2	TRUE	TRUE	TRUE	95.5	94.8	94.7	121.03062:6161 122.03397:656 123.03733:0	65.04065:19 80.00037:9 91.03131:28 92.02783:367 93.03931:65 106.00599:9 120.02229:83 121.02946:512	6306	6161	5599	6658	6038	522	308	411	471	585	860	314	368	538	592	582	730	403	419	548	652	486	558
226	14.51	107.048	Benzaldehyde	[M+H]+	TRUE	107.05	C7H6O	TRUE	TRUE	TRUE	81	71.3	90	107.04638:1658 108.04973:249 109.05309:52	50.02729:14 51.02963:33 51.03669:28 53.04358:14 55.019:9 65.04104:28 65.05698:9 71.92838:14 77.04043:167 79.05304:19 81.03441:9 89.94122:5 91.05573:37 105.07652:5 107.04623:51	1380	1488	1658	2095	1700	1707	1585	1436	986	636	662	1253	1368	1253	567	602	590	1655	1648	1285	1040	371	376
2701	0.966	455.114	Asperulosidic acid	[M+Na]+	TRUE	455.11	C18H24O12	TRUE	TRUE	TRUE	83.2	71.3	75	455.11319:14104 456.11654:4612 457.1199:3483	112.89381:56 245.05936:19 453.94678:39 455.11441:1201	12773	15050	15487	16590	15442	29208	12538	14263	16329	17651	13281	15584	16998	16808	17345	15654	14104	35043	17466	14249	13970	15524	13896
2941	9.968	493.135	Anthocyanidin base + 4O, 2MeO, O-Hex	[M]+	TRUE	493.133	C23H25O12	TRUE	TRUE	TRUE	88.4	88.3	79.5	493.1344:66372 494.13775:25586 495.14111:7724	69.04325:19 85.02476:56 85.04168:56 119.01505:19 127.03806:74 140.04471:19 145.04819:93 257.04233:19 267.08948:19 270.04816:167 270.07831:19 274.96948:19 287.0509:37 298.04291:56 310.66046:19 313.03351:114 315.04718:480 316.06021:270 330.03363:74 330.04645:93 330.06439:93 331.05502:128 331.08072:22910 331.2785:356 331.38644:117 331.53033:181 331.68457:165 331.74112:56 331.8414:199 332.07288:75 33…	243119	315638	313837	317371	307174	66211	61126	66372	74558	65535	77674	136935	101842	117667	109635	98706	91577	70206	84597	73487	70791	70717	51586
891	9.782	271.06	Aloe-emodin	[M+H]+	TRUE	271.06	C15H10O5	TRUE	TRUE	TRUE	91.2	83.3	87.9	271.05829:4198 272.06164:636 273.065:84	114.09059:37 119.0524:19 153.01291:130 201.00317:19 269.79803:39 271.05609:1159	3068	4198	4502	6488	5635	1060	1263	1372	1367	1332	2511	1953	2474	2901	2928	2973	2772	1339	1757	1755	1788	1881	1648
446	26.558	277.217	a-Linolenic acid	[M-H]-	TRUE	277.218	C18H30O2	TRUE	TRUE	TRUE	85.3	88	77	277.21887:1948 278.22222:1002 279.22558:315	277.21494:204 277.24313:93	1948	2288	2204	1676	2149	305	361	636	296	601	473	332	395	380	425	578	500	608	770	709	694	597	548
1666	1.025	348.07	adenosine 5'-monophosphate	[M+H]+	TRUE	348.071	C10H14N5O7P	TRUE	TRUE	TRUE	90.7	79.2	92.8	348.07315:2792 349.0765:1720 350.07986:0	97.0295:56 119.04:19 136.06073:565 182.06448:19 212.83565:37 283.84628:19 348.06598:37	1820	2190	3320	2792	2133	5817	2650	2873	3168	3510	3694	3066	3236	2762	4481	4308	4661	5812	4749	3449	4061	5402	3740
1015	15.554	285.075	Acacetin	[M+H]+	TRUE	285.076	C16H12O5	TRUE	TRUE	TRUE	91.2	85	89.1	285.07474:1818 286.07809:446 287.08145:704	55.05691:3 89.04139:1 95.08915:3 109.09921:3 119.04526:3 119.08376:4 121.02938:6 123.04555:3 124.0135:7 128.06218:3 133.09763:3 139.05118:3 141.07918:3 143.08977:3 145.02789:4 147.11255:3 155.02649:3 157.09839:4 159.11461:3 165.0191:3 165.13155:1 167.03246:19 168.06476:3 169.08554:3 170.86507:10 183.11813:4 184.86618:3 187.03735:6 187.16672:3 191.14246:3 196.05229:3 197.0556:7 199.04202:3 211.143…	1839	1818	1839	1954	1851	17	19	4	16	14	14	19	14	25	25	17	23	12	12	20	18	26	26
544	21.99	301.217	Abietic acid	[M-H]-	TRUE	301.219	C20H30O2	TRUE	TRUE	TRUE	84.9	72.9	73.8	301.21991:8338 302.22326:2085 303.22662:614	255.23123:19 300.26245:58 301.21948:2036	9142	8338	7797	7495	7837	56	69	174	52	207	154	84	83	87	70	178	69	66	39	121	156	306	130
451	28.56	279.229	9Z,12Z-Linoleic acid	[M-H]-	TRUE	279.23	C18H32O2	TRUE	TRUE	TRUE	85.2	88	76.9	279.22916:1574 280.23251:1219 281.23587:2279	279.22467:37	379	190	523	342	1574	152	204	86	417	460	418	106	102	1004	349	542	476	142	275	324	417	634	399
505	14.844	293.212	9-HOTrE	[M-H]1-	TRUE	293.212	C18H30O3	TRUE	TRUE	TRUE	89.7	74.8	91.7	293.21161:1306 294.21496:125 295.21832:0	67.06264:5 121.10044:23 149.14439:5 171.10318:74 172.10532:5 179.15302:5 213.33252:5 221.15216:9 231.21318:19 236.10201:9 247.16347:5 249.22028:14 273.18634:5 275.20096:65 291.2038:5 293.17249:23 293.20874:42 293.23532:23	267	414	446	554	701	1306	1026	1257	932	884	764	299	343	191	167	330	283	835	633	293	286	705	504
516	17.427	295.227	9-Hode	[M-H]1-	TRUE	295.228	C18H32O3	TRUE	TRUE	TRUE	89.1	77.7	89.9	295.23065:10812 296.234:2494 297.23736:4052	57.03942:19 59.01656:19 115.0378:19 123.08344:19 125.09747:56 137.09656:37 139.11014:28 141.12332:37 149.02414:9 151.11104:28 155.14546:74 165.12836:28 167.14223:19 171.09946:37 181.16661:19 251.23689:65 277.21127:56 277.832:9 295.2251:1409	11191	11210	10971	13291	11641	10466	11609	10324	9611	9836	11097	9346	9812	10929	8202	9931	10451	10153	9980	11093	9980	11120	10812
3606	9.156	595.165	8-[4,5-dihydroxy-6-(hydroxymethyl)-3-[3,4,5-trihydroxy-6-(hydroxymethyl)oxan-2-yl]oxyoxan-2-yl]-5,7-dihydroxy-2-(4-hydroxyphenyl)chromen-4-one	[M+H]+	TRUE	595.166	C27H30O15	TRUE	TRUE	TRUE	91.5	85.9	98	595.16351:7080 596.16686:3527 597.17022:1051	71.08191:9 271.05984:46 283.04889:19 283.05838:279 284.08765:19 291.09421:9 295.07425:28 307.40918:9 309.07953:28 312.08212:19 313.0679:548 323.08975:37 335.05511:19 337.06833:336 345.83743:9 349.06589:65 351.08896:19 355.54382:9 361.06668:56 367.07825:269 379.07709:158 397.0925:195 409.0943:37 415.10034:344 427.08917:37 431.66675:19 433.10498:444 439.10077:28 451.138:9 473.10281:9 475.10062:28 4…	19633	25357	29577	32170	30929	9739	8011	10383	6649	6524	6707	16559	12780	11399	12437	10171	10539	13281	9596	10774	11746	7717	7080
1777	9.956	593.154	8-[(2S,3R,4R,5S,6R)-3,4-dihydroxy-6-(hydroxymethyl)-5-[(2S,3R,4S,5S,6R)-3,4,5-trihydroxy-6-(hydroxymethyl)oxan-2-yl]oxyoxan-2-yl]-5,7-dihydroxy-2-(4-hydroxyphenyl)chromen-4-one	[M-H]-	TRUE	593.151	C27H30O15	TRUE	TRUE	TRUE	81.5	72.7	79.4	593.14941:1127 594.15276:377 595.15612:188	311.05933:9 323.06931:19 353.07175:9 398.05981:9 413.06693:28 413.08987:102 413.11282:37 563.17889:9 593.05017:19 593.15668:274	947	1566	1461	1516	1662	565	609	562	628	748	1127	1122	1083	1553	1474	1728	1352	626	1130	903	707	886	688
1458	9.637	491.121	7-hydroxy-2-(4-hydroxy-3,5-dimethoxyphenyl)-5-[(2S,3R,4S,5S,6R)-3,4,5-trihydroxy-6-(hydroxymethyl)oxan-2-yl]oxychromen-4-one	[M-H]-	TRUE	491.12	C23H24O12	TRUE	TRUE	TRUE	92.5	87.6	91.5	491.12125:174013 492.1246:56727 493.12796:13691	107.03294:9 121.02942:19 148.01555:46 149.02177:74 151.00108:46 161.02547:37 177.05363:19 185.02345:28 199.03868:28 214.0278:28 219.06639:28 221.03865:19 227.03183:56 239.59502:9 243.02623:65 243.06145:28 255.02812:102 261.07025:28 269.03659:19 270.01904:37 270.04688:28 271.0242:343 282.01465:28 284.03293:28 285.0376:84 285.07812:84 286.04883:37 297.02783:19 299.01846:1201 300.0542:65 310.04242:3…	185213	174013	182803	187647	189746	18605	27426	23319	27962	33705	50443	46790	58237	56886	53070	57512	53189	25386	37168	37621	31783	28553	31366
329	0.905	130.05	5-oxo-L-proline	[M+H]+	TRUE	130.05	C5H7NO3	TRUE	TRUE	TRUE	89.1	81.9	92.5	130.04843:5409 131.05178:538 132.05514:256	56.05514:149 69.04168:19 77.04029:19 84.04642:304 85.02885:37 130.06915:56	4929	5409	5739	6042	6448	7018	3207	2996	2717	2508	2324	5053	4842	5111	4311	4369	4193	11320	6196	5380	5267	5356	3929
1335	9.628	461.107	5,7-dihydroxy-6-methoxy-2-[4-[(2S,3R,4S,5S,6R)-3,4,5-trihydroxy-6-(hydroxymethyl)oxan-2-yl]oxyphenyl]chromen-4-one	[M-H]-	TRUE	461.109	C22H22O11	TRUE	TRUE	TRUE	82.8	74.4	78	461.10703:4904 462.11038:1435 463.11374:330	284.03098:167 285.03568:38 298.04608:57 299.05573:1062 341.06253:167 354.06058:19 371.07944:37 383.0864:19 400.95062:38 446.0722:57 446.08411:77 461.10455:1164	15987	16680	14869	16508	15087	1697	2083	1734	1965	2505	3648	3995	4904	4077	4683	4573	4419	1758	3042	2707	2374	1917	2261
3394	8.905	565.153	5,7-dihydroxy-2-(4-hydroxyphenyl)-8-[3,4,5-trihydroxy-6-(hydroxymethyl)oxan-2-yl]-6-(3,4,5-trihydroxyoxan-2-yl)chromen-4-one	[M+H]+	TRUE	565.154	C26H28O14	TRUE	TRUE	TRUE	88.9	92	85.1	565.15332:16577 566.15667:6384 567.16003:1664	295.06088:56 299.29977:6 307.06387:93 313.06894:19 321.07172:19 325.06772:180 335.08957:19 337.06659:93 349.07193:118 351.09766:25 353.37067:6 355.08688:50 359.08795:6 361.07007:62 363.07648:12 365.09921:12 367.07889:37 373.07458:37 375.09488:19 377.89404:6 379.08038:328 391.0795:149 396.07248:13 397.08728:218 401.09717:12 403.07849:68 405.09879:12 408.3298:13 409.0889:308 415.08911:43 415.09198:…	40562	53230	47912	53791	64465	17770	16577	14330	14695	15505	14017	40542	30884	41879	39918	35460	18951	27467	17383	19217	18499	16420	10997
3399	8.957	565.155	5,7-dihydroxy-2-(4-hydroxyphenyl)-6-[3,4,5-trihydroxy-6-(hydroxymethyl)oxan-2-yl]-8-(3,4,5-trihydroxyoxan-2-yl)chromen-4-one	[M+H]+	TRUE	565.153	C26H28O14	TRUE	TRUE	TRUE	87.6	86	87.6	565.15369:19936 566.15704:6950 567.1604:2247	223.07449:9 269.03055:9 271.06024:37 279.29529:9 283.05637:46 294.05219:19 295.06244:102 305.0751:9 307.05811:111 309.0773:19 313.06812:74 320.06503:19 321.08102:28 323.05188:19 325.06693:176 333.07639:19 335.09659:19 337.06586:121 347.08554:46 349.06332:111 351.07846:37 355.07556:56 361.05865:19 361.0694:65 363.0462:19 365.09586:28 367.07825:139 367.09988:46 373.06577:19 373.08212:19 375.07513:1…	41284	53337	47464	55089	69070	17166	16648	14644	14251	15618	16835	40532	34176	42814	40507	37009	23354	18182	18724	19936	17915	16919	11480
1037	15.377	287.092	5,7,4'-Trihydroxy-8-methylflavanone	[M+H]+	TRUE	287.09	C16H14O5	TRUE	TRUE	TRUE	90.7	78.5	91.7	287.08871:1362 288.09206:291 289.09542:130	111.12381:19 141.09259:19 147.03725:56 147.04239:111 167.03256:260 167.05627:56 172.86183:74 287.09381:93	1265	1232	1344	1367	1362	14	12	11	18	13	23	5	14	19	28	22	31	14	11	17	18	28	18
286	20.386	205.159	4-Octylphenol	[M-H]-	TRUE	205.16	C14H22O	TRUE	TRUE	TRUE	92.2	85	87.9	205.15891:25929 206.16226:4903 207.16562:598	123.00506:19 149.09985:74 152.83347:38 161.02252:38 173.10649:19 177.9156:38 189.12839:807 190.13518:74 191.74026:37 202.52147:19 204.51686:85 204.98338:52 205.15923:9483 205.30885:157 205.41202:186	12827	27715	20998	27161	27237	31880	26014	27998	25549	24795	27058	29397	25245	26245	25305	25457	22958	28237	30443	22424	26095	42217	25929
175	5.964	137.025	4-Hydroxybenzoate	[M-H]-	TRUE	137.024	C7H6O3	TRUE	TRUE	TRUE	91.3	83	86.6	137.02454:3186 138.02789:686 139.03125:258	65.04328:62 65.0558:31 75.02478:9 92.74332:6 92.75148:16 93.03579:886 93.14065:11 99.92484:9 136.88887:15 137.02431:19	1217	497	721	1053	632	1869	1938	2708	2722	2537	3186	1606	1928	2156	2134	1861	1848	1884	2438	2428	1982	2496	1839
2636	9.695	449.106	2'-Hydroxygenistein-7-O-glucoside	[M+H]+	TRUE	449.103	C21H20O11	TRUE	TRUE	TRUE	83.2	81.9	76.6	449.10257:2925 450.10592:550 451.10928:184	135.04004:19 207.05753:38 240.85423:19 287.05289:708	2146	2925	2687	2883	3019	699	1019	763	920	997	1368	2500	2775	2994	3277	3440	2618	603	1104	836	684	916	723
3242	18.444	537.303	[(2R)-2,3-bis[[(2R,3R,4S,5R,6R)-3,4,5-trihydroxy-6-(hydroxymethyl)oxan-2-yl]oxy]propyl] (9Z,12Z,15Z)-octadeca-9,12,15-trienoate	[M+Na]+	TRUE	537.3	C27H46O9	TRUE	TRUE	TRUE	84.5	84.8	78.3	537.30035:9570 538.3037:3853 539.30706:970	135.08304:4 266.49466:4 282.04825:22 283.06143:7 326.98914:7 342.02655:7 375.25897:7 416.0275:7 504.11102:7 535.61603:19 535.66498:7 536.84503:8 537.30304:1382 537.47644:14	6685	7184	9148	9004	10884	8382	9714	9570	8569	9827	10745	3420	3786	6690	4107	4161	4773	5921	5595	3907	7560	7159	4755
437	6.39	155.034	2,5-Dihydroxybenzoate	[M+H]+	TRUE	155.034	C7H6O4	TRUE	TRUE	TRUE	86.5	89.8	81.8	155.03284:1288 156.03619:114 157.03955:98	53.04496:15 65.04625:9 67.05955:6 68.99678:6 80.78664:6 81.03423:93 81.07616:9 93.04515:6 96.02047:6 109.02873:56 111.04542:6 112.40463:3 121.06258:3 137.02237:90	460	468	568	668	879	1027	875	862	992	890	1285	1276	1405	1620	1668	1277	1871	1288	1209	1043	1168	993	662
1161	16.197	302.304	2,2'-(Tetradecylimino)diethanol	[M+H]+	TRUE	302.305	C18H39NO2	TRUE	TRUE	TRUE	93.3	89.4	90.3	302.30441:14309 303.30776:3773 304.31112:515	57.07252:46 58.06749:9 70.06565:53 71.08666:31 85.10223:15 86.10525:3 88.07591:136 98.96596:3 102.08941:43 106.08704:105 240.25902:6 240.26776:12 258.27893:31 284.29004:201 285.29294:9 302.30267:1304 302.4917:21	13	15	6	13	4	7691	10649	13150	13200	11303	9155	12708	14179	13542	10643	12642	14309	10104	14015	13162	10767	15712	11514
4064	11.845	683.358	2-((7-acetamido-1,2,3-trimethoxy-9-oxo-5,6,7,9-tetrahydrobenzo[a]heptalen-10-yl)amino)-N-(3-(5-isopropyl-1H-1,2,4-triazol-3-yl)phenyl)-4-methylpentanamide	[M+H]+	TRUE	683.36	C38H46N6O6	TRUE	TRUE	TRUE	84.8	84.8	76	683.35797:1446 684.36132:574 685.36468:241	323.13031:6 683.22504:25 683.3653:654	1994	2123	2800	2995	2670	1712	1554	1598	1446	1545	1467	1305	1248	1190	1071	1228	857	1483	1531	1086	1330	1388	980
2690	18.646	454.291	1-palmitoyl-2-hydroxy-sn-glycero-3-phosphoethanolamine	[M+H]+	TRUE	454.293	C21H44NO7P	TRUE	TRUE	TRUE	82.3	85.3	71.1	454.29102:7672 455.29437:2224 456.29773:421	57.07957:9 62.06067:23 62.07623:9 85.10053:14 89.06122:5 98.98524:5 109.11169:5 127.15164:5 155.00824:23 173.03065:9 188.14191:5 211.12628:5 237.22296:5 239.23172:14 257.25232:9 282.27783:37 313.25809:28 313.2706:412 380.99298:5 393.26294:14 436.27847:9	7331	7524	7718	8139	8687	12771	10758	9699	10230	10063	8012	7107	9007	10183	7672	8354	8942	12969	7219	6213	8478	10196	8252
1006	8.378	385.112	1-O-b-D-glucopyranosyl sinapate	[M-H]-	TRUE	385.113	C17H22O10	TRUE	TRUE	TRUE	87.2	84	76	385.11475:5219 386.1181:760 387.12146:475	59.01737:37 71.01444:23 85.03327:5 113.02405:19 119.01491:14 119.03493:19 145.55711:5 147.0047:23 149.02403:37 149.03954:19 164.0473:102 175.00398:102 178.03995:5 179.07158:37 190.02435:475 204.40599:19 205.05022:1189 206.04579:14 219.08859:5 221.08405:32 223.05904:227 232.03688:28 244.17554:5 247.05774:42 250.04613:14 265.06213:37 275.0351:5 325.08966:23 385.21802:14	5025	4707	4692	4491	4743	4708	5518	5669	4855	7117	8693	6851	7965	7518	6948	7418	6743	4571	8048	6051	5226	6850	5219
1803	24.746	359.315	1-Monostearin	[M+H]+	TRUE	359.315	C21H42O4	TRUE	TRUE	TRUE	80.4	77.2	70.6	359.31415:20664 360.3175:5927 361.32086:1090	55.06317:56 57.07449:130 57.08302:93 67.06519:37 69.07407:37 71.08641:204 81.06724:56 81.08249:56 83.08775:74 85.10187:74 95.08505:93 97.0997:37 109.0997:74 109.12035:37 117.08901:19 123.11544:111 285.2789:37 341.30597:260 341.32681:56	19525	17011	18286	18434	17172	25401	25812	20664	15433	14673	13186	27045	25016	20302	18809	15301	13136	17724	26280	21680	16271	27205	15790
537	17.522	299.258	12-Hydroxyoctadecanoic acid	[M-H]-	TRUE	299.259	C18H36O3	TRUE	TRUE	TRUE	89.9	83.8	85.5	299.2562:7327 300.25955:1500 301.26291:230	113.09884:13 127.10828:5 167.14345:11 169.153:8 169.15666:27 223.04343:5 253.25578:50 281.24808:90 297.24042:42 297.26477:11 298.31207:21 299.15857:11 299.20007:19 299.25867:1517 299.4418:9 299.55417:5	4519	7327	6864	7549	6964	2740	5015	5128	6422	8573	7475	3400	2516	5489	6893	6560	12627	3532	2835	8711	7965	2257	8920
1547	8.505	517.155	[6-[3,4-dihydroxy-2,5-bis(hydroxymethyl)oxolan-2-yl]oxy-3,4,5-trihydroxyoxan-2-yl]methyl (E)-3-(4-hydroxy-3-methoxyphenyl)prop-2-enoate	[M-H]-	TRUE	517.156	C22H30O14	TRUE	TRUE	TRUE	89.5	92.7	92	517.15472:2992 518.15807:861 519.16143:192	134.03152:28 134.03806:28 149.06351:19 160.03346:19 173.05804:9 175.03738:167 182.00893:9 193.04787:232 195.97098:9 233.82878:9 235.06276:111 259.06186:9 265.06406:37 282.17987:9 295.08194:56 323.09454:19 336.03848:9 337.09494:37 341.12613:9 355.09808:37 515.53741:19 517.16022:407	601	767	1003	892	894	1585	1360	1640	1665	1324	1637	2075	2310	2540	2113	2992	2178	1563	2068	1954	1659	2333	1529
1625	8.575	547.164	[(2R,3S,4S,5R,6R)-6-[(2S,3S,4S,5R)-3,4-dihydroxy-2,5-bis(hydroxymethyl)oxolan-2-yl]oxy-3,4,5-trihydroxyoxan-2-yl]methyl (E)-3-(4-hydroxy-3,5-dimethoxyphenyl)prop-2-enoate	[M-H]-	TRUE	547.167	C23H32O15	TRUE	TRUE	TRUE	91.2	83.7	88.3	547.16437:3471 548.16772:672 549.17108:384	145.04649:6 164.04881:31 179.06932:19 190.02199:25 203.64749:6 205.05174:167 205.06993:62 208.03349:12 223.05846:210 251.091:6 265.07056:124 295.07419:37 323.83774:6 325.09366:37 341.10464:19 353.09488:6 367.09644:37 385.11136:37 545.43396:13 547.16589:556	891	951	810	722	1138	1350	1770	1723	1707	1769	1804	2218	3428	3239	3526	3668	3471	1128	1378	1151	1363	1168	1117
688	10.989	329.233	(Z)-5,8,11-trihydroxyoctadec-9-enoic acid	[M-H]-	TRUE	329.233	C18H34O5	TRUE	TRUE	TRUE	91.9	85.4	89.2	329.23438:33700 330.23772:7840 331.24108:1137	57.03377:28 57.04657:19 83.04901:28 87.02634:19 97.083:9 99.07908:121 123.09425:19 125.09579:84 125.11473:19 127.11347:121 129.08955:28 137.09508:19 139.11037:84 143.10568:19 149.13145:28 151.11156:19 155.14082:93 155.16544:28 157.11783:19 165.12381:56 167.10667:37 167.14134:167 168.14828:19 171.1042:269 172.123:19 175.13217:28 181.12044:46 181.15083:9 183.13763:587 185.11414:37 193.12231:241 195…	5295	5019	4752	4729	4258	34522	22110	23286	24805	23372	14349	1009	879	934	1236	924	996	33700	8540	2898	4415	25390	11819
681	12.86	329.068	(2Z)-4,6-dihydroxy-2-[(4-hydroxy-3,5-dimethoxyphenyl)methylidene]-1-benzofuran-3-one	[M-H]-	TRUE	329.067	C17H14O7	TRUE	TRUE	TRUE	93.4	87.6	90.4	329.0687:31020 330.07205:5963 331.07541:994	59.17234:4 128.02132:4 133.02634:7 143.05743:7 147.00934:4 151.00122:15 155.06764:7 157.02472:11 161.02046:37 169.95834:4 171.0457:11 173.01541:7 175.04121:7 182.0396:7 183.04839:26 185.02055:15 185.11464:11 187.00522:15 189.12274:7 199.03203:11 199.03799:30 201.01422:19 201.11029:19 203.03239:30 203.05853:19 205.75043:4 215.03215:22 215.13565:4 226.02483:7 227.03601:108 229.00748:15 242.97812:11…	15982	26143	27761	25631	27353	14594	16303	17661	19456	18034	18511	31020	34746	30918	37272	28462	34984	38085	37566	36827	31614	26007	31306
930	7.556	371.096	(2S,3S,4S,5R,6R)-6-(3-benzoyloxy-2-hydroxypropoxy)-3,4,5-trihydroxyoxane-2-carboxylic acid	[M-H]-	TRUE	371.099	C16H20O10	TRUE	TRUE	TRUE	88.4	86.7	91.5	371.09848:9905 372.10183:957 373.10519:435	59.01676:34 69.00503:9 71.01615:28 71.50822:3 73.44997:3 75.01011:46 75.02722:15 77.04186:65 77.0592:9 85.03252:65 87.0052:6 87.01442:15 87.65546:3 89.02713:25 93.03717:9 95.01615:40 99.01271:37 99.02816:9 103.0042:15 105.42188:3 113.02917:105 113.03818:46 115.00495:12 117.01921:28 121.03187:646 129.02113:28 149.06609:3 157.01518:22 164.04984:9 175.02713:31 187.0619:3 189.03802:19 223.05984:15 23…	19994	18659	16623	16124	19556	6570	8487	8193	9992	11369	15146	14480	19370	19686	16934	18454	16196	8225	12567	9802	9905	11301	10447
2491	24.679	431.311	(2'R,5'R,9S)-4-hydroxy-5',6a,8a,9-tetramethylicosahydrospiro[naphtho[2',1':4,5]indeno[2,1-b]furan-10,2'-pyran]-2(11aH)-one	[M+H]+	TRUE	431.31	C27H42O4	TRUE	TRUE	TRUE	88.8	83.2	75	431.30945:2008 432.3128:655 433.31616:1920	429.95459:9 431.30789:158 431.35773:19	1860	2151	1652	1613	1384	1040	1149	1058	938	793	804	1667	1926	1697	1273	1047	932	1675	2008	1310	849	1532	820
738	6.854	337.095	(1R,3R,4S,5R)-1,3,4-trihydroxy-5-[(E)-3-(4-hydroxyphenyl)prop-2-enoyl]oxycyclohexane-1-carboxylic acid	[M-H]-	TRUE	337.093	C16H18O8	TRUE	TRUE	TRUE	81.1	76.9	78.6	337.09451:1872 338.09786:292 339.10122:73	111.75797:5 119.05312:60 122.67147:5 135.06425:5 155.03398:23 162.52797:9 163.03758:158 170.22829:5 173.0444:19 189.011:5 191.05586:135 337.08224:9	1605	1872	1665	1535	1229	253	271	292	200	477	480	251	386	568	218	294	359	175	340	243	115	221	191
907	6.989	367.103	(1R,3R,4S,5R)-1,3,4-trihydroxy-5-[(E)-3-(4-hydroxy-3-methoxyphenyl)prop-2-enoyl]oxycyclohexane-1-carboxylic acid	[M-H]-	TRUE	367.103	C17H20O9	TRUE	TRUE	TRUE	92.3	93.8	87.8	367.10269:35276 368.10604:7524 369.1094:1857	59.02801:7 71.01429:7 75.95118:4 83.04965:7 85.03057:19 87.00982:7 89.04514:15 92.02913:4 93.03517:33 111.04613:74 111.05952:26 117.03696:178 125.06426:4 127.0387:15 129.01579:11 129.0222:19 133.61871:30 133.69214:8 134.03671:3672 134.16257:34 134.24596:37 134.25577:11 134.55684:11 134.78123:11 134.80745:7 135.04518:11 135.15674:7 135.20596:7 137.02223:22 137.04207:11 149.05356:167 149.06046:663 …	25457	23905	24298	23222	24860	22288	28015	31591	30173	37061	35293	33769	45605	46026	42914	49098	41863	24416	35276	27353	27851	37767	26181
670	10.429	327.216	(10E,15Z)-9,12,13-trihydroxyoctadeca-10,15-dienoic acid	[M-H]-	TRUE	327.218	C18H32O5	TRUE	TRUE	TRUE	86.1	87.4	87.6	327.21616:6195 328.21951:1170 329.22287:180	69.03481:19 85.03181:19 97.07504:37 125.09413:19 125.10519:19 127.11018:19 153.12685:9 167.13684:19 167.14597:46 171.10143:130 171.11989:37 175.10875:28 177.12979:28 183.13837:74 183.16319:28 185.11484:37 191.13913:9 193.11702:28 197.11324:28 199.14958:9 209.11876:65 211.11966:28 211.12991:538 211.58749:19 216.12416:9 221.11592:111 227.12511:19 229.13112:28 229.13966:336 229.16743:74 239.13193:56…	1682	1577	1562	1397	1643	8848	6195	6604	6209	6318	3487	399	456	443	418	638	444	7198	2763	971	1302	5310	3126
737	6.496	337.092	Coumaroyl quinic acid	[M-H]-	TRUE	337.091	C16H18O8	TRUE	TRUE	TRUE	90.9	78.8	91.3	337.09192:4755 338.09527:1292 339.09863:152	118.04071:9 119.05187:186 120.05342:6 137.03516:9 155.03612:28 163.03978:778 170.66357:3 173.04483:37 173.05968:9 191.0544:74	4115	4755	4231	3907	4137	468	603	599	464	613	698	851	1308	1587	885	1420	1089	336	394	421	487	364	212

## Sheet: S3-leaf
Alignment ID	Average Rt(min)	Average Mz	Metabolite name	Adduct type	MS/MS assigned	Reference m/z	Formula	RT matched	m/z matched	MS/MS matched	Total score	Dot product	Reverse dot product	MS1 isotopic spectrum	MS/MS spectrum	QC1	QC2	QC3	QC4	QC5	CK1	CK2	CK3	CK4	CK5	CK6	H1	H2	H3	H4	H5	H6	L1	L2	L3	L4	L5	L6
6582	6.891	339.165	Yohimbic Acid	[M-H]-	TRUE	339.171	C20H24N2O3	TRUE	TRUE	TRUE	84.5	72.9	73.9	339.17319:851 340.17654:0 341.1799:72	89.02658:9 339.16379:56 339.18719:28	877	851	799	1164	780	913	736	903	802	797	656	1174	884	723	786	876	656	955	750	858	779	859	777
4552	18.349	277.221	y-Linolenic acid	[M-H]-	TRUE	277.218	C18H30O2	TRUE	TRUE	TRUE	88.9	88	76.7	277.2168:2006 278.22015:240 279.22351:120	277.22235:130	896	849	910	1150	1116	2006	2279	1922	1770	2324	1407	662	2034	963	791	643	1053	1253	1204	1078	1261	1322	2568
3524	9.551	587.132	Vicenin III	[M+Na]+	TRUE	587.13	C26H28O14	TRUE	TRUE	TRUE	84.8	76.6	80.7	587.13153:1325 588.13488:549 589.13824:581	457.11331:19 497.11273:19 509.1058:37 527.12042:19 569.11566:93 587.13373:204 587.16797:130	239	292	302	358	520	1461	1028	1079	959	1104	1177	1082	1286	1381	1650	985	800	1226	1325	1298	838	823	1003
430	9.372	153.054	Vanillin	[M+H]+	TRUE	153.055	C8H8O3	TRUE	TRUE	TRUE	86.1	94	82.1	153.0602:1198 154.06355:0 155.06691:0	65.03881:93 65.0536:74 93.03393:93	1015	1198	1116	1445	1335	166	265	214	340	263	185	290	182	338	420	241	240	187	230	352	149	225	262
276	1.102	118.085	Valine	[M+H]+	TRUE	118.087	C5H11NO2	TRUE	TRUE	TRUE	84.2	86.5	82.3	118.0903:2920 119.09365:545 120.09701:182	53.04335:19 55.05547:130 56.05602:19 57.06132:56 58.06802:74 59.07702:74 71.07408:19 72.08202:167 72.0904:74 83.01653:19	1221	2320	1294	1729	2056	2954	2920	2976	3396	2992	2349	3328	3647	4454	2862	3234	2656	3011	2656	2501	2075	2140	2360
3286	7.324	215.127	Undecanedioic acid	[M-H]-	TRUE	215.129	C11H20O4	TRUE	TRUE	TRUE	88.8	84.2	90.4	215.12054:718 216.12389:0 217.12725:164	109.06937:9 153.12283:28 197.11209:19 215.15277:19	682	718	745	610	591	703	709	404	555	537	576	459	494	536	695	522	566	558	446	606	542	413	417
3101	6.47	203.081	Tryptophan	[M-H]-	TRUE	203.083	C11H12N2O2	TRUE	TRUE	TRUE	92.8	84.1	91.4	203.0809:1816 204.08425:410 205.08761:82	59.0123:19 74.02309:19 74.04496:19 116.04243:19 116.05154:139 123.05401:19 140.07771:9 142.06421:56 203.07895:19	1325	104	122	1221	129	1048	931	792	735	1025	782	1816	1459	1198	1130	1056	1420	961	1071	959	987	1091	760
359	0.975	138.054	Trigonelline	[M+H]+	TRUE	138.055	C7H7NO2	TRUE	TRUE	TRUE	93.9	92.7	92.1	138.05376:9744 139.05711:1548 140.06047:197	51.02768:93 52.03794:37 53.04062:74 65.03699:37 65.04041:149 66.06326:37 67.0571:111 67.06403:37 77.0364:37 78.03572:360 79.04399:93 80.04863:37 92.04987:791 93.0575:93 93.44598:38 94.0665:624 108.03635:19 120.05551:19 136.04152:74 137.62665:56 138.05421:860 138.07744:93	6361	7842	7347	7763	8857	14758	15378	15112	15704	15496	14909	12811	10928	9744	12771	11847	12099	12201	13790	11319	11309	11373	12409
3753	9.289	243.161	Tridecanedioic acid	[M-H]-	TRUE	243.16	C13H24O4	TRUE	TRUE	TRUE	86.9	81.7	74.5	243.16133:654 244.16468:0 245.16804:162	181.16206:46 217.0576:9 225.14772:84	402	458	345	654	450	362	505	297	258	286	205	248	363	338	479	363	410	281	515	345	443	301	424
1414	9.973	331.081	Tricin	[M+H]+	TRUE	331.081	C17H14O7	TRUE	TRUE	TRUE	93.3	91.6	88.9	331.08105:412029 332.0844:103600 333.08776:22078	108.01826:37 113.23653:19 120.01633:19 126.04853:19 128.05804:56 130.07541:37 133.02843:37 134.03812:37 136.01131:337 137.01735:75 139.05554:111 143.04874:37 144.05164:37 150.02325:37 150.03017:74 151.03986:74 152.00941:97 153.01524:876 155.04741:74 157.05937:37 158.06755:37 161.02905:56 163.03607:111 164.04515:56 166.0217:37 168.05402:37 171.03705:37 171.04257:74 173.05702:56 174.41336:38 176.04…	172414	202134	226877	254888	246383	440581	349188	354568	353051	322457	356844	417229	412029	345405	343112	338812	362901	336647	315728	289487	251007	272841	275677
5629	16.822	311.166	Thymol-beta-D-glucoside	[M-H]-	TRUE	311.15	C16H24O6	TRUE	TRUE	TRUE	85.1	82	87.7	311.16351:53290 312.16686:11985 313.17022:4419	56.94032:6 71.05284:6 79.9565:19 119.04781:130 170.00349:186 182.43678:56 182.45395:40 182.65799:14 182.99579:56 183.01106:4888 183.1562:70 183.24408:30 183.63596:12 183.79283:19 183.98039:19 184.01294:261 197.02274:136 198.03043:87 211.03828:31 212.04416:80 223.17815:6 225.05656:99 226.06133:93 226.08467:25 237.18314:6 239.06709:87 239.09111:37 240.07639:43 247.20091:74 253.08734:31 254.08977:25…	67290	64594	64023	75449	67259	59493	54023	54222	49559	53308	50829	56362	53290	50916	53775	53649	47328	56949	54883	53689	54804	54737	49641
2810	10.062	485.103	Tectoridin	[M+Na]+	TRUE	485.1	C22H22O11	TRUE	TRUE	TRUE	93.2	87.8	87.8	485.09955:1455 486.1029:590 487.10626:0	323.0459:56 485.10065:167 485.13174:74	2377	3189	2860	3242	2638	1482	1869	1455	1542	1063	1671	1848	1280	1584	1371	882	1213	2126	2009	2015	1799	1754	1402
12860	10.025	507.117	Syringetin-3-O-glucoside	[M-H]-	TRUE	507.114	C23H24O13	TRUE	TRUE	TRUE	93.8	92.6	92.4	507.112:6235 508.11535:2088 509.11871:285	149.0072:9 151.00552:37 163.00453:9 168.03427:9 234.05856:19 242.0174:19 242.03935:19 258.01447:19 258.02127:9 269.00681:19 273.03818:37 287.06955:19 298.29224:9 301.03604:65 315.04358:19 316.05649:19 329.03671:37 330.03851:19 342.99402:19 344.05872:398 345.06216:111 345.09363:37 387.06619:28 492.11658:28 503.06656:9 506.51035:20 507.11725:1085	3652	3248	3271	3879	3692	9635	9448	7925	7118	7688	8339	9592	10425	9276	8954	9398	8541	6488	6153	6046	5382	5925	6235
2566	9.688	447.126	Swertisin	[M+H]+	TRUE	447.13	C22H22O10	TRUE	TRUE	TRUE	96.5	91.9	97.4	447.12875:21996 448.1321:8487 449.13546:5913	121.0307:19 146.18004:9 179.03099:19 189.05106:9 203.02992:19 229.0652:19 247.06947:9 255.07877:9 257.04391:37 267.06577:84 281.08121:19 284.0686:37 285.07349:56 294.05191:28 295.05487:19 296.12997:28 296.147:37 297.07565:2468 297.37256:19 298.47382:19 301.07913:19 306.08902:19 308.0679:56 309.06717:56 311.06558:28 317.10703:9 321.0632:19 321.0708:28 322.08331:56 323.09235:370 324.90906:19 325.06…	6879	9040	9040	10358	11190	26454	27648	24388	21614	26151	18690	34482	30938	31302	29400	28975	32395	30882	26202	25222	22000	21996	21386
1777	1.045	360.15	SUCROSE	[M+NH4]+	TRUE	360.15	C12H22O11	TRUE	TRUE	TRUE	90.4	91.8	81.8	360.14871:147308 361.15206:30428 362.15542:15006	53.04131:56 55.02087:339 57.0335:131 57.03671:168 57.04843:93 59.05192:19 61.03483:74 64.09037:19 69.03568:613 69.04623:239 71.04859:37 73.03252:186 79.04655:19 81.03546:149 84.76743:37 84.82202:64 85.03015:3376 85.25417:37 87.04378:37 89.04234:19 91.03934:56 97.03111:1175 98.15781:38 99.04784:247 101.02572:149 101.32246:19 103.04035:93 109.02075:56 109.03107:338 115.04111:456 117.05586:56 121.06…	117908	137738	156749	185185	147308	61602	56890	67361	70057	63738	50292	73929	68994	71652	70530	70784	53026	69602	68886	54709	70748	54897	62887
29496	25.718	941.481	Soyasaponin Bb	[M-H]-	TRUE	941.512	C48H78O18	TRUE	TRUE	TRUE	85.6	73.4	75	941.49579:2957 942.49914:1672 943.5025:2328	555.19269:12 878.5152:6 941.44202:32 941.49402:567	32	1700	2546	3532	1471	1286	12664	8164	7989	10126	9118	12533	14519	13509	11173	4351	2957	10807	8163	11973	9903	7447	3001
8428	8.389	385.111	1-o-Sinapoylglucose	[M-H]-	TRUE	385.113	C17H22O10	TRUE	TRUE	TRUE	91.5	83.4	86.5	385.11337:7305 386.11672:1584 387.12008:581	59.01566:46 60.98347:9 85.03767:9 89.02706:37 113.02456:19 119.02928:28 145.02682:9 147.04799:9 149.02455:65 164.03877:19 164.04962:111 174.99515:19 175.00075:74 179.0683:37 190.02875:473 192.04781:19 205.05069:1092 206.05843:37 208.03448:19 221.07402:28 223.05951:158 232.0352:19 233.06831:9 247.06039:74 265.06485:28 267.07471:28 289.09103:19 325.09256:19 385.12131:28	7237	7547	6933	6351	7568	10182	8949	9279	7097	8388	7305	8895	9057	8623	7684	7656	6702	10526	8846	7897	8080	7313	7851
2569	0.791	173.052	Shikimic acid	[M-H]-	TRUE	173.045	C7H10O5	TRUE	TRUE	TRUE	84.3	72	76.6	173.05153:11646 174.05488:1083 175.05824:577	55.02829:56 57.04196:37 61.34357:19 65.04238:56 65.05263:37 67.02306:111 71.01524:56 72.99976:56 73.03112:56 74.12435:19 78.96056:130 79.1915:19 81.03716:56 81.06766:19 83.01464:56 83.05065:93 83.55047:19 85.03027:130 85.04329:56 92.74782:38 93.03621:285 93.04574:113 96.9705:37 99.00751:37 101.02457:75 111.00706:341 111.04722:74 129.05217:37 137.02502:56 154.9043:111 155.00092:56	5574	6532	4880	6063	5686	15392	11646	11305	7223	11234	9239	13230	13657	8919	10899	10698	9619	10675	9898	8724	8139	11222	11305
1800	5.931	137.025	Salicylic acid	[M-H]-	TRUE	137.024	C7H6O3	TRUE	TRUE	TRUE	93.8	84.9	88	137.02727:8331 138.03062:1863 139.03398:162	65.04007:201 65.05373:74 69.09324:5 75.02628:19 92.7451:14 93.03485:1647 93.08523:25 93.20374:19 93.59249:14 99.92673:19 136.8913:14 137.03004:19	477	84	119	168	332	9770	8331	8094	6842	7541	7027	10848	10035	8304	9944	8920	8961	11098	11993	9717	7788	10246	8562
4899	15.436	285.075	Sakuranetin	[M-H]-	TRUE	285.077	C16H14O5	TRUE	TRUE	TRUE	86.9	85.6	77.7	285.07086:2655 286.07421:444 287.07757:222	65.01797:19 93.03669:28 97.02795:19 117.03989:9 119.04871:186 119.06565:37 125.09404:9 149.99709:19 165.01364:65 165.01909:223 165.03722:46 179.03896:19 270.0452:37 285.06689:28 285.14313:19	2655	2919	3052	3114	3292	256	164	259	200	174	75	149	389	196	152	152	63	89	174	143	212	41	99
29090	20.697	925.517	Saikosaponin C	[M-H]-	TRUE	925.517	C48H78O17	TRUE	TRUE	TRUE	88.8	71.8	75	925.51697:2657 926.52032:1524 927.52368:1143	253.09663:9 805.53345:9 922.8576:19 925.53503:661	79	71	174	71	228	602	1109	860	1459	1135	1170	2657	1242	2597	2345	2800	2684	1348	1882	1346	1224	1228	651
23704	23.998	779.475	Saikosaponin a	[M-H]-	TRUE	779.459	C42H68O13	TRUE	TRUE	TRUE	83.7	73.7	75	779.47534:9294 780.47869:6006 781.48205:5148	278.20908:19 705.58142:19 766.49017:74 777.03357:38 779.47479:1539 779.4906:2572	8567	6482	5135	7053	5910	9294	9912	9818	8389	8054	10104	9103	7721	8770	7100	9435	10293	11152	11629	10676	10674	9674	11437
1609	11.544	345.098	Robinetin trimethyl ether	[M+H]+	TRUE	345.097	C18H16O7	TRUE	TRUE	TRUE	81.6	76.6	77.3	345.09662:2279 346.09997:632 347.10333:113	255.05409:19 255.06311:46 284.06619:102 286.05142:19 299.05438:28 300.05606:37 303.14236:9 315.05145:102 327.09549:9 329.06165:46 330.06873:37 344.0256:9 345.09464:329	228	223	367	369	396	1905	2061	1813	1651	1800	1406	2638	1985	2279	1912	1929	1820	1140	1103	1272	1181	909	970
12725	0.996	503.155	Raffinose	[M-H]-	TRUE	503.162	C18H32O16	TRUE	TRUE	TRUE	87.3	73.9	75.6	503.16055:13918 504.1639:5682 505.16726:1766	59.01533:93 59.02942:37 71.01688:111 72.99778:19 87.00984:56 89.02649:461 99.0246:19 101.02335:148 101.0418:56 102.60843:19 107.03575:74 111.00867:19 113.02378:186 113.04179:56 117.07019:19 119.0346:391 119.0577:74 129.02968:19 131.03989:74 141.02209:19 143.0338:260 143.05237:37 149.04413:74 159.03465:56 159.08449:56 160.07938:74 161.04335:562 161.08633:38 162.7872:19 179.05748:1417 183.31491:19 …	16377	13668	13918	14722	14720	9836	9442	9926	8249	10163	7360	8027	11867	7980	8749	8990	7525	9943	9377	6961	6771	8043	9159
1590	0.786	128.034	Pyroglutamic acid	[M-H]-	TRUE	128.034	C5H7NO3	TRUE	TRUE	TRUE	85.3	75	74.3	128.03419:1259 129.03754:2341 130.0409:224	128.03029:19 128.03189:19	910	972	1231	1259	1201	1396	1757	1458	1163	1322	1394	1348	1322	1262	1075	1244	1101	1851	1616	1501	1256	1597	1284
17270	26.027	632.35	Pseudojervine	[M+FA-H]-	TRUE	632.344	C33H49NO8	TRUE	TRUE	TRUE	84.6	63.6	85.3	632.3504:2046 633.35375:355 634.35711:426	61.9912:93 632.3183:37	2689	3018	2219	2740	3014	2026	1902	1951	2002	2783	1669	1956	1536	1833	2494	1634	1377	2046	1592	2084	1945	2463	2465
27104	23.356	855.5	PI 36:5	[M-H]-	TRUE	855.503	C45H77O13P	TRUE	TRUE	TRUE	88	85	79.7	855.50525:45257 856.5086:24816 857.51196:7967	61.99801:19 148.1483:9 152.994:56 195.0968:9 222.99562:56 241.00974:195 259.02338:19 277.21362:139 279.22882:111 291.19873:9 297.03217:46 413.2019:56 415.22992:102 415.25293:28 575.26819:56 577.2774:93 577.28754:93 593.27759:19 595.29041:28 852.74139:28 852.78674:56 852.81561:37 853.30615:28 854.46509:19 855.13361:29 855.29456:21 855.3606:45 855.51331:15759 855.80646:179 855.823:1156	48425	48211	47961	43673	43285	48358	52417	44727	40750	40883	43854	48614	44606	52155	37012	50015	48052	56707	41716	39040	42604	41937	45257
27174	23.802	857.525	PI 36:4	[M-H]-	TRUE	857.52	C45H79O13P	TRUE	TRUE	TRUE	89.7	93.6	76.1	857.52167:77058 858.52502:36878 859.52838:9864	150.97955:9 152.99625:46 153.01196:19 205.00824:9 223.00259:65 241.01042:176 259.01956:37 277.21909:28 279.22723:329 281.24026:65 297.03052:28 315.05566:19 413.22012:28 415.22229:148 417.23795:46 431.2204:9 468.86716:9 575.25934:19 577.28546:139 579.28461:46 595.27454:46 770.59869:19 829.48114:19 854.76392:65 854.80933:111 855.30042:19 856.23767:19 857.36554:46 857.52258:19418 857.83258:1226	153388	153405	130182	139077	133242	77058	80143	84344	72256	71048	79087	84441	69120	85660	65898	82494	87611	72400	55316	54646	62631	65432	80582
27247	24.263	859.536	PI 36:3	[M-H]-	TRUE	859.53	C45H81O13P	TRUE	TRUE	TRUE	92.7	82.5	83.3	859.52777:87561 860.53112:39020 861.53448:11578	133.87019:19 152.99615:111 213.25003:19 223.00085:130 223.03458:19 241.01093:468 242.50542:19 259.02246:56 261.22144:19 279.23511:356 279.25397:94 281.24109:188 282.25507:19 297.02658:37 297.04117:74 315.05176:37 415.23282:148 417.23987:186 435.24716:37 577.27527:130 579.29816:210 595.32281:19 597.29773:56 685.46753:19 761.65375:19 841.4892:19 844.55457:204 856.7807:111 856.80548:111 856.86328:93…	87000	73429	90577	78321	87561	68984	49177	66286	40976	61897	50084	41695	63797	43747	38363	44706	48233	42695	37888	35923	34923	40546	64671
26098	24.165	833.518	PI 34:2	[M-H]-	TRUE	833.517	C43H79O13P	TRUE	TRUE	TRUE	96.1	89.7	93.4	833.52045:2122829 834.5238:1210586 835.52716:395893	57.60189:19 71.75573:19 78.71861:56 78.95923:262 92.13432:19 96.97036:93 132.86525:19 134.98698:74 151.979:40 152.9951:1754 161.04514:37 167.74597:19 171.00455:56 202.85638:19 204.99484:56 223.00128:1746 233.20061:19 240.24498:74 240.99594:54 241.00908:8159 244.45041:40 252.92809:19 254.43201:77 255.23186:8553 258.21469:38 259.01819:444 273.97952:19 277.21533:93 278.34915:79 278.40332:40 279.2329…	2472770	2278907	2353390	2216815	2328780	1959462	2122053	2068881	1888935	1917513	2122829	2173228	1893835	2170166	1874520	1990165	2217489	1868510	1714018	1573650	1579593	1759543	1767314
26185	24.682	835.537	PI 34:1	[M-H]-	TRUE	835.532	C43H81O13P	TRUE	TRUE	TRUE	95.1	89.8	87.3	835.53583:185273 836.53918:90195 837.54254:36036	81.03558:19 151.05972:19 152.99489:130 184.63963:19 223.00322:111 225.33195:19 240.99577:39 241.00891:483 255.22945:517 259.01804:37 279.28229:38 281.24582:456 288.90958:19 297.03625:130 312.30441:19 366.83969:19 390.04642:38 391.22363:438 404.90317:19 409.22302:56 417.23926:93 471.93597:19 502.63351:19 538.60358:19 548.15784:38 553.27521:481 571.28033:111 577.78259:19 579.30011:130 597.30994:37 …	181876	185427	181470	193195	170125	180805	185273	178437	156841	165510	178504	164885	143271	184047	158761	164961	160505	141133	153062	122278	110089	147994	143793
24914	24.065	807.505	PI 32:1	[M-H]-	TRUE	807.501	C41H77O13P	TRUE	TRUE	TRUE	86.8	80.4	76.9	807.50305:16360 808.5064:7554 809.50976:1715	110.96598:19 172.31471:19 241.01018:93 241.02991:19 253.21661:56 255.22171:93 277.23999:19 279.22464:37 283.28409:19 297.0303:56 363.20343:19 389.20648:56 391.22226:56 553.26343:37 553.28003:93 744.49084:19 789.50433:19 792.49738:167 804.97461:37 807.07428:46 807.46332:130 807.49939:3283	19657	15958	18186	16360	16891	7794	7706	8470	8164	7623	9701	8383	8102	8398	7361	9779	10376	9275	6339	7061	7732	9033	7147
1314	16.47	318.298	Phytosphingosine	[M+H]+	TRUE	318.3	C18H39NO3	TRUE	TRUE	TRUE	92.2	88	92.5	318.29889:35987 319.30224:8234 320.3056:1108	55.05875:29 56.05402:45 56.07622:8 57.03475:11 57.07207:29 59.86732:11 60.04767:539 67.05533:24 69.07339:27 70.06469:13 71.08804:24 74.06286:34 79.05301:8 81.0725:40 82.06815:11 83.08659:34 84.04401:8 85.10585:16 86.06301:21 88.79097:3 90.05635:13 93.06821:11 95.08622:42 97.06606:8 97.10082:16 105.92465:3 107.08564:16 109.09907:19 110.09651:8 121.10227:34 123.11749:16 135.11792:29 137.12871:8 163…	38786	35785	39543	36131	35987	1061	1458	1200	1664	1145	1283	1369	1565	1957	1400	1091	1949	1189	1744	1204	1148	856	1806
536	0.893	184.072	Phosphocholine	[M+H]+	TRUE	184.074	C5H15NO4P	TRUE	TRUE	TRUE	90.7	91.2	90.8	184.07399:2996 185.07734:108 186.0807:27	60.09597:19 71.07511:56 73.15233:19 84.0118:19 86.09589:130 98.98072:56 98.98493:111 104.10654:37 124.99943:372 166.06519:37 184.07253:56	2271	2671	2798	2996	3136	1687	1758	1913	1994	1912	1569	1025	1103	1154	1189	1012	1143	1194	1026	1179	859	1088	1051
469	5.954	166.087	Phenylalanine	[M+H]+	TRUE	166.087	C9H11NO2	TRUE	TRUE	TRUE	90.9	85.6	86.2	166.08691:4670 167.09026:694 168.09362:123	77.04046:79 79.05684:37 89.93725:5 91.05578:46 93.07102:42 103.04922:47 103.05353:334 107.0463:14 118.06625:19 119.07298:19 120.08089:751 130.02966:5	3432	4163	4398	4371	4670	1396	1404	1418	1286	1683	1295	1622	1965	1932	1465	1506	1608	1279	1114	1337	1173	1106	746
19569	24.352	693.477	PG 30:0	[M-H]-	TRUE	693.468	C36H71O10P	TRUE	TRUE	TRUE	91.3	78.9	87	693.46851:46643 694.47186:19725 695.47522:123851	71.31165:19 134.98409:19 152.99736:431 171.01256:37 209.02872:37 227.20148:1449 235.00491:19 241.20749:37 241.21187:148 243.84953:38 253.21674:38 255.23312:1721 260.36597:38 277.21677:317 278.22113:148 279.23434:278 362.04584:19 363.19348:167 370.91351:19 391.22324:167 401.64899:19 413.20963:262 414.21729:93 415.2233:281 431.2186:93 433.21982:37 433.23743:223 434.24567:19 437.23315:148 437.25974:…	37691	46468	45554	45511	46643	52324	54316	56952	51122	60231	54980	49086	41648	52932	46836	51275	51758	61796	49040	57745	55846	56560	51648
2697	9.989	463.122	Peonidin-3-O-glucoside	[M]+	TRUE	463.123	C22H23O11	TRUE	TRUE	TRUE	87.2	83	80.5	463.12277:35006 464.12612:7244 465.12948:1335	57.03662:19 81.03482:19 85.02961:74 91.03761:19 109.02086:19 114.09257:74 121.02799:19 127.03753:56 132.09856:37 142.05919:19 149.05981:19 153.01851:37 228.16006:56 229.05431:56 245.19786:19 258.04932:223 284.08707:19 286.04373:609 300.13376:149 300.14841:111 301.07108:15440 301.2597:626 301.36996:111 301.39447:111 301.50476:167 301.79895:111 301.95346:56 301.98044:37 302.07611:56 302.36078:56 30…	22261	24827	19136	25205	23205	45547	47852	43676	38521	35006	41964	46993	42822	42457	45844	33512	39276	38191	32831	41379	25259	26874	32418
3721	20.751	241.217	Pentadecanoic acid	[M-H]-	TRUE	241.216	C15H30O2	TRUE	TRUE	TRUE	88.6	86.1	77.5	241.21739:3319 242.22074:730 243.2241:146	223.20558:19 231.71346:9 241.2149:306 241.24121:93	6630	6757	6932	7002	6291	2801	2932	1883	2328	2496	2097	2241	2330	2115	2755	3319	2369	2296	3414	1836	1423	1941	2066
10217	9.429	431.098	Pelargonidin-3-O-glucoside	[M-2H]-	TRUE	431.098	C21H21O10	TRUE	TRUE	TRUE	90.4	93.5	83.1	431.09497:5124 432.09832:1662 433.10168:294	225.04807:12 241.07008:6 269.04855:982 283.05893:19 301.07504:6 311.05771:56 325.2352:6 383.08252:6 431.09674:462 431.1319:100	5071	5124	5208	4800	5617	11991	11282	11522	9357	10536	9790	11333	12960	11092	11315	11633	10832	9502	8510	8575	8141	8438	7614
21664	24.582	738.505	PE 36:4	[M-H]-	TRUE	738.503	C41H74NO8P	TRUE	TRUE	TRUE	87	79.8	77.7	738.50507:11056 739.50842:5577 740.51178:8578	277.21124:74 279.23117:535 279.25476:76 458.28775:37 476.27252:93 675.48383:19 678.49884:56 736.15912:19 738.36273:40 738.51233:1255	1354	1525	2383	2963	2003	11056	9341	8770	8388	6958	8863	10593	9197	9230	7621	9084	10548	9436	7245	6720	8626	8960	9626
20369	23.434	712.486	PE 34:3	[M-H]-	TRUE	712.488	C39H72NO8P	TRUE	TRUE	TRUE	85.5	75	79.6	712.48297:12943 713.48632:8493 714.48968:30078	141.261:19 205.19818:19 254.21283:19 255.231:263 258.81293:19 275.20187:38 276.35504:39 277.21213:823 279.23206:74 280.23767:56 281.24985:37 283.42694:19 449.2908:19 452.27246:56 469.80954:38 567.28876:19 649.54559:37 697.45953:38 710.6795:37 712.49048:1890	1114	897	1864	1316	1549	7113	8053	12416	11775	9828	12996	6667	9396	8967	10304	12943	11870	7260	9222	10822	10723	6723	11664
20471	24.03	714.497	PE 34:2	[M-H]-	TRUE	714.504	C39H74NO8P	TRUE	TRUE	TRUE	87.6	70.7	75.8	714.49811:23203 715.50146:7722 716.50482:4719	140.01471:19 153.00023:19 196.06097:19 253.21698:19 254.24892:19 255.23334:407 256.23773:28 277.21674:37 277.24496:19 278.2305:39 279.23669:1236 279.51505:19 280.23996:84 280.57791:19 281.24738:65 282.25186:46 283.26767:56 284.26862:56 434.27319:28 448.26688:19 451.27811:19 452.27408:111 452.3161:65 458.26697:28 696.12225:19 712.21191:19 712.27966:19 713.94934:19 714.52271:2344	8531	8673	9864	9913	11533	28220	28507	28403	23830	20235	19679	30759	23019	25447	19283	31367	23203	27538	22865	20875	22306	17298	18413
675	6.52	220.116	Pantothenate	[M+H]+	TRUE	220.118	C9H17NO5	TRUE	TRUE	TRUE	88.2	77.6	88.6	220.11647:3731 221.11982:411 222.12318:97	53.48892:1 56.06291:1 57.07681:9 59.05156:4 59.06132:4 67.05618:14 67.07005:4 69.0708:10 70.02904:10 72.04796:21 72.28419:3 73.03379:4 83.05077:4 85.07097:13 86.09869:3 90.05546:27 90.06886:6 95.05244:14 96.08463:4 98.02592:21 98.04269:4 100.03745:3 103.07585:6 107.05166:4 110.95099:1 113.05885:6 116.03497:7 118.06303:3 123.08159:3 124.07645:41 130.08784:3 140.12415:1 142.08763:17 145.10184:3 157…	2207	3547	3802	4457	5081	3731	4006	3471	3549	3149	2206	3557	4062	3387	3730	2832	3051	3262	3320	3002	3064	2848	1756
3967	20.494	253.213	Palmitoleic acid	[M-H]-	TRUE	253.218	C16H30O2	TRUE	TRUE	TRUE	89.7	86.8	80.4	253.21368:3628 254.21703:882 255.22039:756	217.85759:19 235.22752:19 253.21193:431	5606	5547	6034	5025	6070	2411	3445	2807	3647	1966	3381	2575	3364	2629	3230	5189	4463	3556	3628	3517	3300	2210	2558
4698	30.417	281.249	Oleic acid	[M-H]-	TRUE	281.249	C18H34O2	TRUE	TRUE	TRUE	89.6	75	75	281.24936:4360 282.25271:2447 283.25607:5467	281.25034:130	454	573	4360	1010	629	511	725	402	1216	316	227	515	542	334	645	224	283	641	435	419	636	281	157
2865	10.517	493.133	Oenin	[M]+	TRUE	493.135	C23H25O12	TRUE	TRUE	TRUE	89	84.5	76.7	493.13251:88073 494.13586:37012 495.13922:8288	127.0369:19 153.03447:37 241.04211:19 255.02798:19 258.05069:56 270.0527:186 286.04193:56 287.05743:56 298.77585:19 301.58578:19 313.03702:38 315.05063:605 316.06113:219 330.05206:167 330.22388:93 330.92966:83 331.08374:25383 331.28152:980 331.38943:394 331.41769:130 331.53592:74 331.68756:205 331.84698:276 332.01157:186 332.07843:56 332.12988:74 332.28424:74 332.4129:37 332.70636:111 333.31168:3…	79305	98472	100392	88073	108982	144827	189752	137835	124016	165048	128185	170656	213379	168255	137505	107605	112688	112986	111385	113187	110629	75209	85020
2084	8.475	393.207	Octaethylene glycol	[M+Na]+	TRUE	393.209	C16H34O9	TRUE	TRUE	TRUE	86.5	88	82.1	393.20969:1622 394.21304:290 395.2164:177	393.20795:279	711	969	811	830	901	2693	1064	1083	1180	2133	1622	1205	1576	1187	1133	1652	1456	1168	1233	1088	1082	1445	1516
14804	8.48	563.137	6-[3,4-Dihydroxy-5-(hydroxymethyl)oxolan-2-yl]-5,7-dihydroxy-2-(4-hydroxyphenyl)-8-[3,4,5-trihydroxy-6-(hydroxymethyl)oxan-2-yl]chromen-4-one	[M-H]-	TRUE	563.141	C26H28O14	TRUE	TRUE	TRUE	91.2	85.3	82.6	563.1394:81655 564.14275:33400 565.14611:7918	119.06479:19 191.04982:19 203.03885:9 218.41505:9 233.04489:19 279.01532:9 296.06836:46 297.08191:65 299.05325:9 311.06787:56 323.0527:37 324.06314:19 325.06754:74 335.05478:19 337.06775:19 341.07272:19 351.95209:28 353.05713:382 353.06772:949 353.50812:19 355.07288:28 365.07043:84 367.07959:19 379.08533:19 381.8797:28 383.07492:679 383.71329:19 391.07208:19 395.07358:84 401.08578:19 407.07217:37…	48686	46601	42055	41720	46350	108135	93742	99353	88256	87751	81655	98074	101699	89508	84682	83322	81959	90893	81518	79965	71530	80817	72521
14805	8.086	563.138	8-[3,4-Dihydroxy-5-(hydroxymethyl)oxolan-2-yl]-5,7-dihydroxy-2-(4-hydroxyphenyl)-6-[3,4,5-trihydroxy-6-(hydroxymethyl)oxan-2-yl]chromen-4-one	[M-H]-	TRUE	563.141	C26H28O14	TRUE	TRUE	TRUE	95	94.9	89.4	563.13788:17168 564.14123:5309 565.14459:1895	57.07675:1 115.00459:1 161.02277:3 173.04918:1 177.04715:1 191.02979:3 213.05362:3 218.53545:1 221.06319:3 225.08739:3 234.04291:3 253.08844:3 259.01913:3 263.07367:3 267.06741:3 281.0647:4 283.05582:3 295.06055:3 296.06027:4 297.07626:16 307.05731:3 309.09613:3 311.0546:11 322.0531:3 323.05438:9 324.06229:4 325.07175:16 335.05386:6 337.05908:3 337.0824:6 339.11703:1 341.06918:4 351.04089:6 351.9…	17168	17463	16400	14629	15544	31281	27574	26921	25818	27966	21294	28418	30771	23507	24800	22856	23912	25897	25080	22748	23400	24055	22234
2497	8.79	437.231	Nonaethylene glycol	[M+Na]+	TRUE	437.236	C18H38O10	TRUE	TRUE	TRUE	86.9	88	84.3	437.23502:1129 438.23837:420 439.24173:84	437.23038:204	649	689	706	526	585	2401	932	1248	860	1600	1518	1129	1339	861	950	1061	1178	815	845	737	784	1299	1271
2780	9.213	479.116	Nepetin-7-glucoside	[M+H]+	TRUE	479.119	C22H22O12	TRUE	TRUE	TRUE	87.4	74.1	82.3	479.11917:3275 480.12252:1016 481.12588:367	121.10451:19 268.16257:19 274.04495:74 281.21597:19 302.03973:56 317.06387:831 479.24957:37	414	600	530	710	748	3850	3208	3049	2905	2989	2436	3361	3724	3275	2746	2750	3574	2957	2564	2498	2781	2370	1760
2292	17.026	415.213	Niranthin	[M-H2O+H]+	TRUE	415.211	C24H32O7	TRUE	TRUE	TRUE	88.2	88	78.7	415.21039:38438 416.21374:12429 417.2171:2339	55.05877:3 61.95153:3 65.03762:9 69.03941:15 73.06532:3 77.04417:15 81.03062:15 81.07383:3 83.39443:3 91.05981:65 93.06693:6 99.0467:6 103.05638:12 104.06044:19 105.0737:9 107.08281:34 109.99888:3 115.05351:50 117.06989:90 118.72052:40 118.79743:19 118.99752:10 119.08685:4268 119.20548:21 119.27484:12 119.28717:12 119.36118:15 119.54631:12 119.61269:9 119.77792:9 119.89999:9 120.24026:9 127.04196…	42828	38464	41029	36726	38438	23471	21036	27655	33183	54823	43825	24613	16080	17701	18562	21494	56878	22893	24865	45226	68978	28282	78735
2253	8.417	409.18	4-[4-(beta-D-glucopyranosyloxy)-2-hydroxy-2,6,6-trimethylcyclohexylidene]-3-Buten-2-one	[M+Na]+	TRUE	409.183	C19H30O8	TRUE	TRUE	TRUE	83	84.7	79.3	409.17975:1884 410.1831:699 411.18646:525	189.07324:9 220.98607:9 409.18079:232	1738	1998	1879	1142	1488	2262	1901	1491	1683	1418	1585	1661	1840	1880	1829	1731	1884	1965	1960	1610	1392	1775	1706
2435	16.999	432.238	7b,9-Dihydroxy-3-(hydroxymethyl)-1,1,6,8-tetramethyl-5-oxo-1,1a,1b,4,4a,5,7a,7b,8,9-decahydro-9ah-cyclopropa[3,4]benzo[1,2-e]azulen-9a-yl acetate	[M+ACN+H]+	TRUE	432.238	C22H30O6	TRUE	TRUE	TRUE	83.2	82.9	76.4	432.23932:8265 433.24267:3159 434.24603:698	55.05525:8 57.03765:13 69.03472:50 81.03479:13 81.17717:3 83.04975:19 85.02697:19 91.03893:8 91.05374:21 99.04202:8 99.06168:8 103.03883:11 105.07484:8 107.08548:93 111.04341:29 113.06657:3 115.05045:16 117.06839:27 117.08366:11 118.71444:16 119.08538:1130 119.35818:13 129.05327:61 129.07091:21 133.06561:29 134.66776:8 135.07924:564 147.06567:56 157.09982:8 281.13986:37 415.2056:32	21393	15775	15134	16037	14995	8969	9329	9363	15511	21388	22498	8147	6283	5839	6866	8265	24130	7384	9002	19276	27155	14112	29008
13987	9.049	539.204	2-[3-[4-[1,3-Dihydroxy-1-(4-hydroxy-3-methoxyphenyl)propan-2-yl]oxy-3-methoxyphenyl]propoxy]-6-(hydroxymethyl)oxane-3,4,5-triol	[M-H]-	TRUE	539.214	C26H36O12	TRUE	TRUE	TRUE	62.6	86.7	84.1	539.20752:1280 540.21087:534 541.21423:0	150.0321:14 165.05229:46 193.05223:5 195.06755:28 329.13092:14 341.15051:5 343.13986:28 359.06769:5 491.18945:153 521.07214:9 539.12311:9 539.20172:32	601	696	799	590	662	1039	791	1158	822	1189	986	1535	1686	1571	1280	1288	1054	1132	1260	1081	736	813	761
3177	9.363	535.143	6,8-Di-C-beta-D-arabinopyranosylapigenin	[M+H]+	TRUE	535.144	C25H26O13	TRUE	TRUE	TRUE	88.7	92.8	76.8	535.14471:254283 536.14806:141934 537.15142:40479	55.0194:19 94.61783:9 115.0544:19 119.04472:28 121.02578:158 141.06754:28 145.02809:37 155.05161:19 161.0387:19 173.02243:19 175.03352:37 177.01491:56 179.03389:28 189.01318:56 191.02513:19 197.07138:9 201.05045:19 203.02876:84 205.05717:19 207.0327:19 213.01405:28 215.02538:37 215.03159:56 217.04616:19 219.03043:37 225.08189:19 227.02377:28 229.04663:46 233.04169:19 241.05212:19 243.02856:65 245…	171451	208830	180905	206540	203391	316570	207776	221196	254283	247761	166342	222079	174318	261453	239855	224882	167091	258696	179933	193408	183195	237648	252738
2290	16.925	415.211	Gelomulide N	[M-H2O+H]+	TRUE	415.211	C24H32O7	TRUE	TRUE	TRUE	84.1	79.7	75.5	415.21088:27779 416.21423:11925 417.21759:2437	79.05337:19 91.05513:93 104.06161:19 107.08118:19 107.08848:28 111.0435:19 115.0551:74 117.0685:130 118.71301:37 119.08549:3406 119.20414:19 119.27042:19 119.54498:28 119.64377:19 119.71172:28 119.8523:19 120.25597:19 120.37984:19 120.51772:19 125.85036:9 129.05661:19 133.0625:84 135.08102:84 137.11475:9 167.06735:19 415.22394:19	43883	41485	37269	38599	34836	26535	27779	23069	30570	74272	51290	26802	22921	19126	18204	16456	54244	18042	25992	47554	45614	34342	72697
1656	22.983	348.309	2,3-Dihydroxypropyl hexadecanoate	[M+NH4]+	TRUE	348.31	C19H38O4	TRUE	TRUE	TRUE	84.5	83	84	348.30914:14137 349.31249:3660 350.31585:914	57.0728:204 67.05605:37 69.12221:19 71.08517:93 75.04832:19 81.06808:37 85.10129:74 95.08819:111 96.07626:19 97.11393:37 103.07692:19 109.10106:74 123.11479:56 137.134:19 222.23969:19 239.22861:74 239.23734:111 240.26018:37 257.2392:37 267.86237:19 307.16516:38 313.27344:598	14137	12345	10904	11933	11964	4167	4473	3421	2536	3179	2748	4480	3640	3916	3548	2819	2669	4016	4847	3761	3105	3188	2427
1422	22.794	331.28	Monopalmitin	[M+H]+	TRUE	331.283	C19H38O4	TRUE	TRUE	TRUE	80.5	70.5	76.6	331.28329:30658 332.28664:7043 333.29:1990	55.43608:38 57.07169:385 57.48404:37 67.05376:93 69.07181:93 71.08643:301 79.07014:19 81.07079:93 83.08871:130 85.10278:319 95.08022:37 95.0871:241 96.09039:19 97.10172:56 98.98573:37 103.07585:37 109.09854:130 123.11536:74 123.13103:37 132.97487:19 137.12813:56 231.02554:19 239.23051:56 244.24295:19 257.24585:74 288.32339:19 313.26877:130 313.27625:204	30971	30971	29319	30658	28557	12328	11372	11749	6931	10957	8523	11222	12972	7919	8689	5435	6939	11749	9663	9788	8471	9607	10358
909	9.557	273.075	Naringenin chalcone	[M+H]+	TRUE	273.07	C15H12O5	TRUE	TRUE	TRUE	82.7	92	80.3	273.07498:1172 274.07833:118 275.08169:177	119.04819:37 137.00859:19 147.04149:74 147.06544:19 153.01826:149 153.03748:56	141	341	267	313	241	959	1172	885	883	954	904	913	1010	773	906	794	830	1056	870	841	745	1043	669
4418	12.503	271.059	Naringenin	[M-H]-	TRUE	271.061	C15H12O5	TRUE	TRUE	TRUE	96.4	93.5	94.6	271.05945:4288 272.0628:594 273.06616:119	59.01189:8 63.02003:5 63.02339:13 63.03459:8 63.10521:3 65.00632:27 65.0177:11 81.03761:3 83.01381:27 93.03535:24 107.01282:53 119.05215:249 120.05371:13 121.02686:8 125.02187:8 145.02676:11 151.00388:394 152.00975:16 161.06252:11 165.02008:21 165.03821:13 174.91689:3 177.0157:56 185.05582:8 187.04259:13 227.07466:16 229.05482:8 271.06003:93 271.08328:24	4066	3725	3798	3488	4288	302	317	520	241	362	315	220	217	246	157	147	311	202	308	235	383	312	223
2277	7.514	413.14	N6-Threonylcarbamoyladenosine	[M+H]+	TRUE	413.142	C15H20N6O8	TRUE	TRUE	TRUE	82.3	83.2	76	413.13953:1704 414.14288:479 415.14624:156	120.06676:31 136.06178:136 162.04041:161 281.09732:99	990	1273	1325	1654	1380	1704	1423	1604	1285	1226	1060	1437	1723	1193	1214	968	992	1487	1231	1305	964	964	945
718	14.915	230.247	N,N-Dimethyldodecylamine N-oxide	[M+H]+	TRUE	230.248	C14H31NO	TRUE	TRUE	TRUE	83.7	80.1	73.4	230.24707:3183 231.25042:815 232.25378:0	57.08456:31 71.08635:25 152.11406:6 198.03922:6 212.23305:25 230.24504:149 230.26431:25	3183	3088	2858	2635	2924	254	334	320	323	263	1028	266	388	486	569	331	2119	306	269	244	255	321	1438
3505	19.354	227.201	Myristic acid	[M-H]-	TRUE	227.202	C14H28O2	TRUE	TRUE	TRUE	90.2	87.6	76.2	227.20169:11990 228.20504:3036 229.2084:264	209.19328:25 227.2005:627	11990	12506	12818	13309	13661	6187	5459	5194	4041	5888	4781	6312	7993	4428	5719	4806	6056	5137	6446	4746	3956	4604	5003
1830	1.03	365.106	Methylophiopogonanone A	[M+Na]+	TRUE	365.1	C19H18O6	TRUE	TRUE	TRUE	95.9	92.2	93.3	365.10013:50551 366.10348:6630 367.10684:5070	153.10905:38 184.59392:40 185.04295:1584 185.66176:21 199.92979:19 203.05148:4234 203.30098:46 203.82863:37 245.04903:57 275.09381:19 356.72418:39 365.10416:2687	141695	145643	171513	165414	169587	42894	58933	51131	50551	61076	46654	50410	57832	52612	43531	46861	45615	48431	47907	46115	43417	47168	38560
7700	7.737	367.103	methyl chlorogenate	[M-H]-	TRUE	367.104	C17H20O9	TRUE	TRUE	TRUE	86.5	79.1	72.1	367.10257:3662 368.10592:518 369.10928:444	93.03513:19 111.04742:19 134.03629:84 137.02509:46 143.03403:9 155.03427:28 163.04694:9 173.04482:344 173.06152:121 187.19:9 191.05641:139 193.04561:84 264.1062:19 367.35056:28	3603	3658	3387	3662	3600	1574	1187	1452	1154	1162	929	1091	1222	1010	790	839	1039	746	1000	859	826	880	984
3112	1.017	527.158	Melezitose	[M+Na]+	TRUE	527.158	C18H32O16	TRUE	TRUE	TRUE	86.7	88.5	79.1	527.15845:15034 528.1618:4293 529.16516:3005	185.03896:186 185.062:37 203.04878:111 265.09537:19 274.61105:37 277.19711:19 335.07367:19 347.09338:518 348.04865:19 363.94449:37 364.21112:38 365.1033:1269 365.82648:21 425.12518:19 525.49011:56 525.76514:37 527.16101:2977	10189	10497	9771	15034	13107	7247	5483	6075	6053	5752	5357	5122	6873	6345	4591	7228	6472	6784	5958	4935	6383	5339	4484
2362	3.313	163.039	M-Coumaric acid	[M-H]-	TRUE	163.042	C9H8O3	TRUE	TRUE	TRUE	89.7	83.4	85.9	163.03926:716 164.04261:130 165.04597:195	61.98932:4 61.99599:4 91.02067:6 91.07722:1 93.03399:11 117.03531:4 118.68093:3 119.0487:114 145.88905:3 163.00003:3	630	716	663	578	580	251	269	84	126	310	259	141	213	151	213	291	86	189	159	173	154	351	88
3954	10.01	655.182	Malvin	[M]+	TRUE	655.187	C29H35O17	TRUE	TRUE	TRUE	82.4	73.9	81.3	655.1828:4718 656.18615:1398 657.18951:931	145.04625:37 299.05444:19 331.06714:94 331.07486:797 493.13141:186 566.43024:56 569.32642:19 655.17737:37	2198	2959	3039	2990	3225	4071	5022	3410	4526	2827	4474	4554	4453	4177	4718	3572	4570	3442	2133	3200	3243	2426	2679
1587	1.042	343.122	Maltose	[M+H]+	TRUE	343.123	C12H22O11	TRUE	TRUE	TRUE	82.1	84.4	70	343.121:16554 344.12435:2545 345.12771:849	57.03777:37 69.03794:37 81.31128:19 85.02998:264 97.02667:56 101.03963:37 109.02336:37 110.03082:19 115.04528:19 127.03802:372 145.04749:223 145.06448:74 163.05675:93	12763	12921	16554	18308	15770	7671	9866	9135	7115	6010	8040	8442	7810	10460	8757	8354	8044	7951	8595	5542	8689	7599	8817
326	6.282	127.038	Maltol	[M+H]+	TRUE	127.039	C6H6O3	TRUE	TRUE	TRUE	85.5	76.2	87.2	127.03889:1233 128.04224:132 129.0456:78	53.03916:6 67.05777:3 69.03487:6 72.94378:9 81.03367:6 97.0296:3 109.02541:9 127.03925:37	336	423	431	437	482	1084	987	1164	1183	1233	938	1137	1378	1115	964	915	1066	857	966	946	980	868	918
30379	25.555	973.525	Madecassoside	[M-H]-	TRUE	973.501	C48H78O20	TRUE	TRUE	TRUE	85	90.6	87.4	973.5238:31776 974.52715:16110 975.53051:5128	277.21454:31 278.22125:19 331.21414:6 397.13071:31 415.13177:12 657.349:49 659.35529:25 675.35065:37 892.46844:6 913.59015:25 913.63281:12 935.61499:43 936.44409:6 937.58472:37 970.42322:25 970.49799:19 973.47699:19 973.55627:4402 973.8866:131	32785	25788	30181	26757	31776	51560	32461	47405	26201	34250	53647	32663	52002	38472	51230	26607	35580	34624	51368	40478	42790	49315	42219
1619	24.801	346.308	Macamide B	[M+H]+	TRUE	346.31	C23H39NO	TRUE	TRUE	TRUE	83.1	74.5	78.8	346.30969:2317 347.31304:539 348.3164:46	91.05515:74 152.14172:9 273.1814:9 346.30771:102	3600	4150	3535	4547	4201	3201	2317	2337	2135	2209	1607	2437	2053	2576	2359	2260	1982	2800	2208	1950	2411	1924	1432
10705	5.6	447.105	Luteolin-7-O-glucoside	[M-H]-	TRUE	447.093	C21H20O11	TRUE	TRUE	TRUE	84.7	75.2	82.4	447.09937:896 448.10272:364 449.10608:91	133.04564:9 152.01355:56 152.02573:28 168.9874:9 447.11014:204	1140	1472	1207	1329	1024	1410	1246	1457	1211	1615	896	1377	1592	939	1712	1090	1044	1600	1308	958	1014	1514	1079
10703	9.691	447.094	luteolin-7-glucoside	[M-H]-	TRUE	447.093	C21H20O11	TRUE	TRUE	TRUE	91.9	86.5	90.4	447.0943:7438 448.09765:1575 449.10101:715	225.00003:19 281.04974:19 284.03424:93 285.03894:903 285.06039:195 285.55389:20 291.83685:19 297.03168:37 321.79138:19 327.04855:74 355.03632:19 357.05768:74 368.79398:38 387.23038:38 399.11859:19 429.09317:38 447.05612:38 447.09195:639	2690	2726	2622	2572	3660	7438	6162	5647	4406	4901	4322	7458	6592	6746	5420	5340	6560	7152	6802	6298	6246	6498	5844
10700	8.741	447.088	Luteolin-6-C-glucoside	[M-H]-	TRUE	447.093	C21H20O11	TRUE	TRUE	TRUE	87.8	83.2	77.2	447.09332:35546 448.09667:8210 449.10003:3282	59.01889:111 101.01849:37 121.0304:37 131.02977:19 133.02615:37 149.02489:19 161.02704:37 161.04495:56 179.05179:37 189.14116:37 206.06917:19 229.01012:37 245.99971:19 282.81033:19 285.04349:357 295.25601:19 297.03638:476 298.04919:241 299.06125:148 311.06363:111 324.03088:56 325.04031:74 326.01566:56 327.05112:3355 327.24515:76 327.37793:61 337.08154:38 337.98392:19 339.04861:394 339.43597:19 35…	15820	15547	16088	14039	14855	33210	31900	29930	25825	25350	26173	42298	45859	36830	38154	34932	35867	40630	35546	35501	33619	36063	34160
1055	9.181	287.055	Luteolin	[M+H]+	TRUE	287.056	C15H10O6	TRUE	TRUE	TRUE	92.3	88	88	287.05298:1927 288.05633:475 289.05969:125	153.01627:56 287.05417:297	169	241	228	292	190	1733	1790	1851	1471	1440	1317	1574	1929	1716	1709	1503	1370	1927	1458	1599	1719	1627	1410
624	7.306	205.095	L-Tryptophan	[M+H]+	TRUE	205.097	C11H12N2O2	TRUE	TRUE	TRUE	93.3	86.5	96.7	205.0952:5241 206.09855:882 207.10191:70	55.94331:12 56.94438:19 57.07333:9 59.06205:3 74.02414:12 77.03558:6 89.0373:6 91.05579:25 93.0329:12 100.93234:37 115.05492:121 116.04875:9 117.05602:87 117.06977:43 117.93118:9 118.06458:669 121.02768:43 127.0545:25 130.06326:102 132.08163:146 142.06487:99 143.07271:121 144.04347:9 144.07906:180 146.05965:609 149.02231:155 159.09126:65 160.07376:9 170.06136:74 188.06744:87	4151	5023	5241	5352	5422	1738	1663	1656	1506	1413	959	2369	2262	2316	1698	1578	1850	1800	1865	1727	1618	1616	1414
1314	0.962	114.057	L-Proline	[M-H]-	TRUE	114.056	C5H9NO2	TRUE	TRUE	TRUE	88.1	70	74.3	114.05745:1187 115.0608:353 116.06416:118	59.01754:19 66.03361:19 114.05011:19 114.05312:19 114.05463:19 114.06066:19 114.0682:19 114.07272:19 114.07423:19 114.07574:19	845	1112	955	889	1187	427	373	371	307	399	573	393	448	278	371	197	385	481	479	332	371	374	437
11797	17.948	476.275	LPE 18:2	[M-H]-	TRUE	476.276	C23H44NO7P	TRUE	TRUE	TRUE	91.7	94.3	81.1	476.27466:4431 477.27801:438 478.28137:730	196.0377:87 214.04683:25 279.23029:725 476.27103:192	3839	3651	4236	4431	3980	2112	2248	1603	1818	2067	1373	1616	1987	1566	1312	1088	1039	1218	742	800	1099	1304	1146
3044	17.234	518.32	LPC 18:3	[M+H]+	TRUE	518.326	C26H48NO7P	TRUE	TRUE	TRUE	84.4	86.2	83.5	518.32397:4258 519.32732:1635 520.33068:437	104.10722:65 115.05273:9 125.01758:19 181.02228:9 184.0717:470 184.09277:74 335.25662:19 498.75937:9 500.31467:84 518.32178:223 518.35071:65	4319	3681	3937	4258	4135	4625	3611	2626	2739	2201	1438	1784	3680	1635	1167	886	909	1942	1584	2081	1955	981	2092
3058	18.16	520.336	LPC 18:2	[M+H]+	TRUE	520.341	C26H50NO7P	TRUE	TRUE	TRUE	86.2	80.1	84.4	520.34082:10020 521.34417:3124 522.34753:813	81.07635:9 86.09727:56 104.10728:217 104.12169:56 106.3211:19 124.99786:37 175.10902:19 184.07292:971 186.3031:19 249.18605:9 258.10843:37 319.9408:9 337.27792:37 443.26007:28 502.33365:139 507.25891:9 520.30328:47 520.33551:495	14634	13408	15539	14797	15023	10020	8955	7316	6057	6779	4197	4958	7101	4223	3772	2116	2767	3999	3745	3276	3200	2727	2945
3083	19.316	522.355	LPC 18:1	[M+H]+	TRUE	522.356	C26H52NO7P	TRUE	TRUE	TRUE	82.4	76.7	82.3	522.35486:4165 523.35821:1292 524.36157:349	86.09641:19 104.1086:56 104.12157:37 126.04549:19 184.06978:358 266.17831:19 490.30334:19 504.34216:56 506.88132:19 522.35327:223	3345	3424	3699	4165	3910	2522	2477	2413	2189	1981	1526	1298	1690	1159	1016	602	812	1063	935	1014	1104	760	997
2905	18.798	496.34	LPC 16:0	[M+H]+	TRUE	496.34	C24H50NO7P	TRUE	TRUE	TRUE	85.7	81	79.9	496.33951:11657 497.34286:3504 498.34622:718	86.09792:41 104.10738:313 123.12322:4 125.00041:52 160.85298:4 166.06645:11 181.03017:7 183.49794:11 184.07391:1034 185.46689:7 233.15453:4 240.09378:7 258.10928:33 313.27145:33 412.06113:4 419.24393:7 477.08893:11 478.33224:182 495.04425:7 496.15979:8 496.29813:15 496.34531:455	10162	10039	10877	11657	12324	7210	7555	6128	6238	5872	3288	7067	6959	7258	4482	3756	3754	6630	4612	4295	5591	3679	3713
4558	19.656	277.255	Linolenic acid	[M-H]-	TRUE	277.24	C18H30O2	TRUE	TRUE	TRUE	60	82	79.5	277.24997:15065 278.25332:4849 279.25668:0	59.02711:28 205.19714:28 233.16621:19 259.21585:28 277.20352:85 277.21527:581	16558	16381	15065	15501	15972	6107	5070	4986	5055	5350	5345	7933	8794	7977	7080	8298	8216	7372	6877	5893	6059	6323	6020
4602	24.466	279.23	Linoleic acid	[M-H]-	TRUE	279.233	C18H32O2	TRUE	TRUE	TRUE	89.6	88	81.4	279.2316:2812 280.23495:0 281.23831:6864	279.23547:278	2812	2574	2622	3019	3145	4146	4241	3051	3337	4528	3861	3145	2193	3908	4241	5147	2908	4480	3146	4290	3670	2765	4577
1630	1.908	130.086	Leucine	[M-H]-	TRUE	130.087	C6H13NO2	TRUE	TRUE	TRUE	90.9	72.7	87.9	130.08517:1123 131.08852:288 132.09188:72	82.07927:9 82.08566:9 130.08942:9 130.09586:9 130.09908:9 130.10229:9 130.11195:9	1495	1325	1330	1809	1530	1135	1108	1123	775	1375	593	1323	1369	1353	795	696	1200	1346	869	658	540	808	435
917	14.839	274.273	Lauryldiethanolamine	[M+H]+	TRUE	274.274	C16H35NO2	TRUE	TRUE	TRUE	93.7	88.5	89	274.27386:74884 275.27721:17578 276.28057:1796	55.05756:11 56.8993:11 57.07298:299 58.06792:29 62.06025:21 62.0736:8 69.86141:8 70.06684:422 71.08664:135 85.09906:58 86.06011:13 87.80916:11 88.07522:801 89.07953:8 102.08955:257 104.0715:11 106.08559:499 141.86263:8 148.9633:11 162.96507:3 176.95857:8 212.23288:74 212.25551:19 214.9166:8 226.37402:3 230.24287:170 231.24417:8 236.88904:3 255.45337:13 255.61807:8 256.26166:1350 256.52609:8 257.2…	79556	72461	74884	74227	73337	9983	10797	9964	10015	11388	11422	12486	13751	15433	14210	13348	32929	9808	9252	9375	9059	9666	12313
566	7.527	190.049	Kynurenic acid	[M+H]+	TRUE	190.05	C10H7NO3	TRUE	TRUE	TRUE	87.5	80.8	86.2	190.04709:1177 191.05044:163 192.0538:9	89.04129:16 89.05461:3 113.9488:1 116.04984:50 117.05563:3 119.97067:1 127.05449:3 130.06497:3 133.013:10 144.04411:236 144.57147:3 149.02142:4 162.05281:7 172.04401:4 190.04578:3	10	27	42	26	27	1257	1179	1225	1222	1258	1234	1838	2074	1848	1821	1592	1836	1177	1204	1248	1159	973	1217
1602	0.77	129.02	Itaconic acid	[M-H]-	TRUE	129.019	C5H6O4	TRUE	TRUE	TRUE	89.2	88	78.4	129.01961:2463 130.02296:224 131.02632:112	85.03191:37	2662	2337	2427	2463	3139	4538	3608	3710	2135	3461	3471	3668	3952	2961	3882	3616	3147	4121	3613	2617	2331	3650	3150
2451	9.529	433.11	Isovitexin	[M+H]+	TRUE	433.113	C21H20O10	TRUE	TRUE	TRUE	85.4	79.9	87.6	433.10965:4931 434.113:803 435.11636:465	281.08432:19 283.05673:223 288.79471:19 295.05798:56 309.07776:37 310.7153:19 313.07108:297 321.07645:19 323.08029:37 337.07156:186 349.07181:56 349.10345:37 351.11606:19 361.07269:93 367.08157:74 373.5737:19 379.08041:74 381.7179:19 397.08743:56 415.09515:37 415.13541:19 433.11139:37	930	1212	1265	1197	1333	3116	2164	3037	2424	2531	2651	4931	5833	4193	4438	3721	4538	2765	2788	2739	2307	2378	2643
8341	7.274	383.191	Isorhynchophylline	[M-H]-	TRUE	383.198	C22H28N2O4	TRUE	TRUE	TRUE	87.7	71.8	75	383.20206:1005 384.20541:240 385.20877:0	297.20862:9 383.18842:158	907	1050	910	1065	1092	1398	1095	1024	681	937	913	916	939	806	1202	1005	1060	1228	1254	864	1149	1019	758
17510	8.627	639.152	isorhamnetin-3-glucoside-4'-glucoside (Isorhamnetin 3,4'-diglucoside)	[M-H]-	TRUE	639.157	C28H32O17	TRUE	TRUE	TRUE	87.6	74.6	80.8	639.15204:5706 640.15539:2424 641.15875:707	137.02298:19 137.0428:9 191.03651:9 401.11743:19 445.08887:19 445.10077:37 463.10379:65 477.15622:9 519.1095:19 577.37152:9 579.13641:37 581.15912:19 591.68958:9 607.14594:28 621.14722:19 637.13086:19 639.15601:1202	2345	2578	2657	2180	2477	5814	6376	5879	5085	6001	5706	9800	11544	10069	10748	9123	8983	4726	4846	3939	3798	3923	3940
11827	10.024	477.107	Isorhamnetin-3-glucoside	[M-H]-	TRUE	477.107	C22H22O12	TRUE	TRUE	TRUE	88	71.7	87.1	477.10675:2098 478.1101:182 479.11346:91	257.04703:19 314.03189:56 314.04691:93 315.07074:56 355.07523:37 446.17557:19 462.0921:37 477.103:281 477.13385:188	797	725	734	497	527	1982	1710	1607	1158	1341	1547	2105	2029	1686	1816	1507	2098	1105	1214	1209	986	1285	891
2576	8.893	449.106	Homoorientin	[M+H]+	TRUE	449.108	C21H20O11	TRUE	TRUE	TRUE	94.4	89.6	94.4	449.10931:44504 450.11266:16119 451.11602:3918	74.45462:9 105.04004:9 131.0493:9 137.01706:19 139.0486:9 165.01541:65 177.01591:19 203.03601:19 245.04335:19 269.12949:9 271.05728:9 283.05338:56 287.04044:28 287.0524:195 297.07047:46 298.11267:46 298.13705:38 298.33939:20 299.05173:2000 299.2446:32 300.05829:46 304.0571:19 307.05997:19 311.05273:177 313.06754:46 315.04874:19 321.07541:37 321.11334:9 323.05383:37 324.05933:19 325.03326:65 325.0…	9152	11557	11345	13429	14950	29710	30396	27144	25941	25286	24657	41871	46992	44504	32513	35013	42177	35956	28178	34495	32081	25115	32123
4379	23.644	269.249	Heptadecanoic acid	[M-H]-	TRUE	269.25	C17H34O2	TRUE	TRUE	TRUE	87.9	83.2	77.8	269.24921:12340 270.25256:1540 271.25592:0	59.01627:111 191.0602:37 223.00131:19 252.02197:19 269.2157:95 269.25043:1356	11925	12340	10146	10327	11382	2979	3328	4151	2798	2319	3845	2948	3558	2565	2079	2678	2831	2468	3780	2574	2512	4051	3868
4060	11.848	683.375	Gypsogenin 3-O-beta-D-glucuronopyranoside	[M+Na]+	TRUE	683.37	C37H56O10	TRUE	TRUE	TRUE	83.3	73.1	75	683.375:1830 684.37835:1717 685.38171:782	192.13593:9 487.31427:9 503.30087:19 681.18347:37 681.59247:19 683.1153:19 683.36621:3006 683.65405:42 683.84595:28	652	747	1097	1457	1402	2410	2570	2454	2009	2324	1564	2826	2418	2083	1951	1459	1505	3559	2012	1830	1706	1634	1452
404	0.922	147.076	Glutamine	[M+H]+	TRUE	147.076	C5H10N2O3	TRUE	TRUE	TRUE	81.5	71	83.3	147.07349:4176 148.07684:7469 149.0802:1175	56.05385:111 60.99619:37 69.98402:37 74.02357:19 84.04087:39 84.04604:445 84.08487:56 85.02847:37 85.41286:19 97.98531:19 128.95053:19 130.04921:37	4176	5233	5603	5186	5566	4783	4911	4607	5117	4336	4344	4460	4342	4179	4448	3632	4082	6959	7105	7124	6498	7624	6437
407	0.913	148.06	Glutamic acid	[M+H]+	TRUE	148.06	C5H9NO4	TRUE	TRUE	TRUE	90.1	90	89.6	148.05928:11391 149.06263:1329 150.06599:279	56.0543:519 56.07861:42 58.06628:39 84.04662:1673 85.03169:56 93.0413:19 102.05489:167 121.02902:19 130.05211:93	12325	14168	14117	15048	14879	12251	11387	11719	12552	11473	10627	11610	11391	10971	11318	8682	11325	12760	12692	12984	11114	13462	12297
4162	0.763	259.018	Glucose-1-phosphate	[M-H]-	TRUE	259.023	C6H13O9P	TRUE	TRUE	TRUE	93.8	82.8	90.2	259.02032:2749 260.02367:138 261.02703:138	71.0145:19 78.95975:283 80.97536:19 96.04195:38 96.97232:270 138.96857:37 241.00116:19 259.01224:56	4318	3757	3581	3771	4273	3258	3199	2888	2551	2622	3135	3549	3590	2727	3193	2518	2425	3565	3108	2832	2310	3470	2749
26637	24.504	845.489	Ginsenoside-Rg1	[M+FA-H]-	TRUE	845.49	C42H72O14	TRUE	TRUE	TRUE	88.2	86.6	74.3	845.48944:143770 846.49279:127856 847.49615:100365	55.45181:19 80.96833:37 125.02579:37 134.9839:37 147.97792:19 149.66011:19 152.98669:74 164.98474:130 183.11502:19 206.99496:56 225.00685:438 261.26392:19 279.22479:37 283.26523:37 432.25381:19 545.95959:19 553.15607:38 559.83508:38 561.27203:304 565.29852:167 583.3161:37 771.57495:111 771.60242:37 831.40173:19 842.76624:57 842.84412:943 842.91785:200 843.36456:96 843.40149:190 843.44653:56 843.6…	155545	67878	136455	152603	113710	276201	178380	176169	242462	331987	192625	355424	288125	327618	260374	226011	144551	203845	169596	143770	190455	222805	114808
23058	24.012	765.483	Ginsenoside Rg6	[M-H]-	TRUE	765.479	C42H70O12	TRUE	TRUE	TRUE	85.9	70.1	73.3	765.47797:234951 766.48132:122821 767.48468:72072	79.95837:19 125.02288:37 148.98936:56 159.51073:19 201.94341:19 206.98679:37 216.19423:19 225.00671:245 255.22821:37 277.21863:93 279.22916:74 340.56396:19 477.69186:19 505.31586:19 507.30078:19 509.23541:111 534.91687:19 537.27631:148 695.47015:19 705.49249:56 740.51886:56 763.04102:405 763.4856:74 763.53235:93 764.49207:74 764.74188:56 764.96436:66 765.22198:153 765.34308:192 765.49146:55789 76…	168502	157362	170967	161565	156570	264334	270391	255734	227371	241854	251614	227109	234951	236993	207240	233974	256499	287976	237806	200265	244478	254127	242996
24576	10.772	799.457	Ginsenoside Rf	[M-H]-	TRUE	799.485	C42H72O14	TRUE	TRUE	TRUE	82.7	70.8	74.5	799.47614:1689 800.47949:637 801.48285:318	61.99121:19 739.19159:37 799.42773:607	1740	1367	1466	1689	1739	2304	1883	1223	1744	2075	1474	1244	1526	1655	1281	1640	2001	1092	610	1772	1262	2136	1737
29600	11.612	945.535	Ginsenoside Re	[M-H]-	TRUE	945.543	C48H82O18	TRUE	TRUE	TRUE	85.2	75	73.7	945.54413:952 946.54748:691 947.55084:0	945.51654:259	1025	1122	924	1373	840	1071	926	1132	917	852	855	952	818	1029	958	682	1237	1283	1027	994	666	960	949
23263	11.283	769.462	Ginsenoside F3	[M-H]-	TRUE	769.474	C41H70O13	TRUE	TRUE	TRUE	85.6	73.3	75	769.46155:1055 770.4649:114 771.46826:114	523.07568:9 769.43512:265	363	643	608	1054	775	429	676	698	897	437	478	627	698	201	241	610	843	320	410	1055	276	374	855
25897	24.1	829.515	Ginsenoside F2	[M+FA-H]-	TRUE	829.495	C42H72O13	TRUE	TRUE	TRUE	86.5	72.2	74.6	829.50647:1041005 830.50982:611071 831.51318:293321	61.99134:28 78.98736:19 80.96902:111 94.98396:37 106.97903:28 122.97676:46 125.02149:46 134.9695:19 134.97441:65 136.99223:28 148.98772:74 152.98167:84 162.96786:9 164.98486:251 167.0015:28 206.99063:93 207.67755:20 225.00429:1116 267.02298:9 269.24399:102 277.21802:74 279.22852:19 283.04095:19 391.22095:65 409.22592:28 551.28784:313 557.289:19 559.19647:19 559.24988:704 569.29114:37 671.46509:24…	681238	626098	627316	629372	620993	1097192	1156136	1095208	981357	1041005	1091543	1147664	1018493	1180470	1012450	1099947	1300307	1195644	1026026	1010726	1023214	1059688	1117587
2636	9.795	455.09	Genistin	[M+Na]+	TRUE	455.09	C21H20O10	TRUE	TRUE	TRUE	89.7	78.2	87.6	455.08875:2494 456.0921:510 457.09546:163	293.03769:111 400.56085:19 455.0899:375 455.35495:37	610	863	856	1041	1112	3418	3150	2648	2924	2701	2494	2988	2122	2486	2158	2901	2531	3127	2559	2639	2506	2022	2717
15382	8.168	579.13	Flavone base + 4O, C-Pen, C-Hex	[M-H]-	TRUE	579.135	C26H28O15	TRUE	TRUE	TRUE	89.8	84.5	82	579.13159:213089 580.13494:70716 581.1383:23575	133.02432:25 177.01385:12 191.0284:12 221.04077:12 229.04817:6 231.25792:6 233.04066:25 263.04703:12 267.07516:19 275.0524:12 297.03589:31 298.04135:56 299.04855:12 311.04568:31 312.0621:68 313.06772:56 323.04785:19 325.06522:25 327.04547:142 338.03784:19 339.05063:179 341.05994:56 351.04208:43 353.05737:37 357.05728:99 367.03931:37 367.88074:25 369.05658:3244 370.07135:31 371.0712:31 381.05853:2…	82642	84486	86137	78256	86162	168029	156403	149201	136753	139812	130412	213089	236089	183616	193245	168472	170204	147620	137368	119503	115105	114035	104412
4443	9.343	787.206	Flavone base + 4O, C-Hex-FeruloylHex	[M+H]+	TRUE	787.209	C37H38O19	TRUE	TRUE	TRUE	81.2	79.1	75.3	787.20465:19747 788.208:20741 789.21136:7549	117.03329:93 121.96935:19 145.02736:392 149.06001:74 149.81409:19 176.49831:74 176.5208:83 177.05383:4268 177.28117:45 178.05258:37 179.74425:37 191.03253:19 195.06287:93 283.0614:37 287.04135:56 287.05811:204 288.06107:19 298.10635:38 299.05273:360 308.69818:19 311.05878:74 314.44382:19 321.09424:289 323.60831:19 325.06241:37 328.02643:38 329.0524:97 329.06522:1613 330.06717:37 331.05267:38 335.…	18814	26123	22278	26648	25157	38188	23050	15188	12502	17207	12220	24179	11710	18541	11788	23367	8579	25525	18003	24176	9671	11190	19747
14808	9.779	563.141	Flavone base + 3O, C-Pen-Hex	[M-H]-	TRUE	563.141	C26H28O14	TRUE	TRUE	TRUE	89.4	80.6	81.8	563.13892:99595 564.14227:33439 565.14563:7366	59.01729:207 59.04766:37 71.01553:56 87.40386:38 89.02509:381 89.03841:95 97.0305:19 101.02904:130 113.02836:148 117.02906:19 119.03625:478 119.05319:115 131.06108:37 143.04251:56 161.06343:19 179.05423:93 269.04947:74 279.06583:19 281.04279:56 282.05878:148 283.07898:37 285.87134:19 287.68784:38 293.04868:1586 295.06235:56 309.05832:37 311.04401:93 311.05646:298 321.04263:38 322.05249:37 323.053…	38428	42088	39759	37911	41005	117177	106791	109102	95834	96803	97456	78172	82026	74390	75654	70736	73034	119536	109676	98547	94193	99595	97668
4272	10.904	741.203	Flavone base + 3O, C-Pen-FeruloylHex	[M+H]+	TRUE	741.201	C36H36O17	TRUE	TRUE	TRUE	87	83.6	83.2	741.20349:49550 742.20684:31341 743.2102:10925	81.54364:19 109.0324:19 117.03152:204 121.03863:19 140.72292:57 145.02698:929 149.05788:56 163.04106:19 176.4996:93 176.51836:37 176.87299:85 177.05325:10601 177.19791:177 178.06143:93 178.08592:37 179.28409:37 192.02231:19 195.06218:279 271.05698:436 272.05954:38 274.72021:19 279.08444:56 281.08301:56 283.06018:630 293.09351:37 295.05664:74 295.07846:37 297.07498:37 297.85403:19 305.07663:37 307…	25875	30736	33142	36552	38634	46769	49550	33529	24976	26132	22066	36374	28795	21635	26515	15152	22496	36334	33264	22370	23154	14569	14604
4370	9.936	771.216	Flavone base + 3O, C-Hex-FeruloylHex	[M+H]+	TRUE	771.21	C37H38O18	TRUE	TRUE	TRUE	81.1	73.9	75.6	771.21289:8412 772.21624:12703 773.2196:4228	118.03172:19 127.04454:19 134.03687:37 145.0244:149 147.04233:297 147.9904:38 165.05766:57 177.04457:79 177.05396:1632 182.71252:19 249.09038:19 271.05255:56 283.05795:130 285.08255:19 291.11295:37 309.09125:56 313.06467:757 321.08255:37 321.10025:167 323.09653:37 328.08102:19 331.56998:38 337.06476:301 339.10217:244 339.12817:75 343.07776:280 349.06479:37 353.10614:37 361.07889:56 367.07697:303 …	10743	12192	14522	14951	14522	15104	17908	7093	19285	6815	4392	12041	17849	8365	5242	13386	5709	5435	8412	4925	6668	7353	7877
4383	11.592	775.207	Flavone base + 3O, 2MeO, O-MalonylHex, O-guaiacylglycerol	[M+H]+	TRUE	775.208	C36H38O19	TRUE	TRUE	TRUE	89.8	90.8	86.1	775.20819:13270 776.21154:7975 777.2149:2785	133.0302:19 151.07133:37 169.06235:19 179.06953:74 187.07347:19 231.35977:19 270.04364:37 270.0506:74 285.04327:56 313.97849:38 315.04993:303 317.06503:38 318.45148:19 329.06784:337 330.03391:74 330.04672:56 330.07748:56 331.08099:5737 331.2865:104 332.08344:130 333.04877:37 334.08514:37 373.08578:37 478.10623:19 479.13458:167 480.86334:19 491.12918:74 493.13956:149 501.1463:19 509.13791:93 509.1…	9432	10992	11744	13864	13952	18687	19646	15503	12914	14350	5455	24456	18893	20053	8696	13754	13270	15208	13154	13702	7375	10519	11102
19017	7.383	681.127	Flavone base + 3O, 2MeO, O-HexA-HexA	[M-H]-	TRUE	681.132	C29H30O19	TRUE	TRUE	TRUE	88.1	79.7	76.8	681.1272:14820 682.13055:5004 683.13391:1300	72.99301:19 73.67469:19 89.02788:9 99.03309:9 113.02384:65 115.07675:9 129.01852:9 131.07872:9 157.0121:19 157.02802:28 175.02562:102 192.42799:19 193.03148:195 235.04227:28 263.04907:19 289.05991:46 300.01288:19 307.06268:37 308.0181:9 315.04803:121 329.06934:148 333.04721:75 349.94714:39 351.05432:2322 351.49872:12 352.48376:19 357.04822:19 360.99011:19 366.88406:9 371.07547:37 399.06052:9 425.…	14143	13636	14820	13689	14749	4488	3811	3769	3618	4315	3408	5158	4919	4015	4029	4020	3448	5309	4783	3670	3897	3843	3965
4000	9.618	669.164	Flavone base + 3O, 2MeO, O-Hex, O-HexA	[M+H]+	TRUE	669.167	C29H32O18	TRUE	TRUE	TRUE	87.4	85.5	81.8	669.1662:13576 670.16955:5749 671.17291:2198	73.0472:19 141.01724:56 296.08432:19 315.04651:149 316.05447:74 323.70367:19 330.04529:74 330.27869:46 331.05643:58 331.07953:4229 332.07166:74 332.64807:37 493.11331:37 493.13525:130 659.37469:19 667.01917:38 669.16443:760	9468	12219	11352	13576	13712	20939	10990	11466	13021	11954	9450	15455	11724	9744	10132	6307	11444	16788	11802	8034	5990	6902	7887
4087	11.096	689.206	Flavone base + 3O, 2MeO, O-guaiacylglyceryl-Hex	[M+H]+	TRUE	689.209	C33H36O16	TRUE	TRUE	TRUE	86.9	88.3	83.5	689.20868:51541 690.21203:27229 691.21539:8397	145.54913:19 178.03302:19 188.16873:19 203.02759:37 229.0477:19 241.04451:37 270.04694:93 286.04129:37 287.05203:74 302.05405:19 315.0434:282 316.05139:111 329.05859:93 330.03488:130 330.22467:56 330.97156:82 331.07941:18571 331.27722:615 331.41852:74 331.53931:130 331.55988:37 331.68326:74 331.81952:93 331.84012:130 332.08185:204 332.12045:56 332.79477:37 336.03174:37 339.86444:37 472.70883:19 4…	30125	35636	33666	37796	39418	51541	49411	33166	30103	34121	30661	71893	60816	47654	43007	39610	41738	33626	24596	23120	19600	17751	17315
3110	10.601	527.156	Flavone base + 3O, 2MeO, O-guaiacylglycerol	[M+H]+	TRUE	527.155	C27H26O11	TRUE	TRUE	TRUE	84.1	87.9	77.5	527.15173:45033 528.15508:27960 529.15844:9226	147.04164:19 242.05165:56 258.06973:56 270.04938:375 286.04379:93 287.05692:93 290.49667:19 298.04904:94 314.02707:38 315.04846:604 316.05646:246 329.06628:74 330.05029:167 330.22983:74 330.57364:51 331.082:15114 331.28238:421 331.38513:102 331.53421:140 331.84268:171 332.0047:74 332.12817:56 332.25168:56 332.55536:74 332.71497:37 334.51459:37 337.73395:37 349.56372:19 359.4476:38 525.80969:39 52…	12577	12189	17083	21534	20322	45826	43749	43100	26287	27759	33190	59961	62387	45033	49399	40770	32863	27896	28105	22712	23305	15957	18802
17922	7.276	651.122	Flavone base + 3O, 1MeO, O-HexA-HexA	[M-H]-	TRUE	651.122	C28H28O18	TRUE	TRUE	TRUE	89.1	86.7	79.5	651.12164:1880 652.12499:294 653.12835:294	102.53159:3 157.0233:3 175.02632:11 191.04121:3 193.03229:24 289.05173:5 291.53586:3 299.04706:8 327.04123:3 351.05612:188 651.12225:77	1880	1709	1728	1208	1208	368	517	346	271	449	292	362	677	496	372	520	392	453	422	404	338	359	260
11202	9.646	461.104	Flavone base + 3O, 1MeO, O-Hex	[M-H]-	TRUE	461.109	C22H22O11	TRUE	TRUE	TRUE	91.4	90.8	85.6	461.10861:45711 462.11196:13432 463.11532:3056	147.04649:37 224.06831:19 233.05113:19 240.03856:37 255.07538:37 256.03656:56 274.6915:19 283.03241:37 284.03296:653 285.05432:56 295.05844:37 298.04068:56 298.12598:83 299.05762:7266 299.24316:177 299.36279:93 299.49469:56 299.7561:56 300.0592:37 313.03448:111 313.08194:37 323.05463:56 327.03952:19 341.06683:356 345.31305:19 369.09616:19 371.07553:56 381.85678:19 443.14188:19 446.08221:130 459.6…	23365	24889	21988	24538	22500	52647	49019	48349	45613	43487	44280	53477	56056	51182	47868	51697	48484	45711	40178	41919	38702	37652	36828
16928	9.073	623.159	Flavone base + 3O, 1MeO, C-Hex-Hex	[M-H]-	TRUE	623.161	C28H32O16	TRUE	TRUE	TRUE	92.9	86.6	89.3	623.15991:109340 624.16326:42148 625.16662:11022	59.01959:99 71.01448:62 83.01633:6 87.01649:19 89.02523:301 101.02492:93 110.6196:6 113.02249:93 113.0375:37 119.03485:413 131.03374:62 143.03421:37 149.04456:56 161.04207:37 175.04671:6 179.05246:62 297.04166:31 299.05432:37 305.73996:6 308.03198:173 311.05652:25 312.06302:31 322.04495:43 323.0538:2304 324.05664:19 327.05145:19 337.07404:19 340.04761:19 341.06601:198 353.06619:235 365.05539:93 3…	57383	57196	57688	55587	55601	145310	137991	127253	120410	125050	114169	150766	158318	139919	133293	139355	135964	127723	129044	120186	111213	118134	109340
4494	9.913	801.223	Flavone base + 3O, 1MeO, C-Hex-FeruloylHex	[M+H]+	TRUE	801.22	C38H40O19	TRUE	TRUE	TRUE	86.3	82.4	84.2	801.22144:32896 802.22479:18508 803.22815:4442	117.03725:37 145.02748:167 145.04788:74 146.23689:38 149.06001:19 165.01703:57 177.05481:2263 178.0592:37 195.05939:74 297.0759:19 301.06946:186 313.07019:167 321.09811:223 325.07385:74 328.07104:37 331.08456:38 339.10742:417 341.99094:37 342.53674:39 343.08295:708 353.09528:37 355.08206:19 363.13058:19 365.92258:38 367.07913:340 372.1701:19 379.07214:37 381.10855:19 389.83249:19 391.08762:56 397…	22381	26022	28613	32896	31320	26140	34456	8172	36817	15106	5226	24469	43167	19547	17881	32082	12862	9186	5703	11770	12926	12652	13056
11206	33.657	461.107	Flavone base + 3O, 1MeO, C-Hex	[M-H]-	TRUE	461.108	C22H22O11	TRUE	TRUE	TRUE	86.2	75.2	82.2	461.10745:1347 462.1108:465 463.11416:372	296.90845:19 298.04041:19 298.04529:19 313.03174:37 341.06659:37 365.09644:9 400.86707:28 429.34302:9 459.67307:9 461.1055:301	383	503	794	849	697	779	1237	852	833	1411	1074	1532	1763	1172	1347	836	1531	977	1412	646	1524	1170	1026
10275	9.079	433.115	Flavanone + 3O, O-Hex	[M-H]-	TRUE	433.112	C21H22O10	TRUE	TRUE	TRUE	90	84.7	86.1	433.10928:802 434.11263:352 435.11599:88	151.00261:56 271.05774:148 415.15182:19 433.10852:37	459	522	646	522	731	953	474	940	620	793	834	917	708	802	839	710	958	944	651	682	742	913	858
1272	11.555	314.137	feruloyltyramine	[M+H]+	TRUE	314.139	C18H19NO4	TRUE	TRUE	TRUE	84.3	85.5	81.2	314.13763:1195 315.14098:405 316.14434:18	117.0343:19 121.06305:50 145.0273:62 149.05635:12 177.05054:118 246.87013:6 279.9548:6	958	1195	1197	1283	1253	37	33	31	26	25	35	52	30	44	48	45	22	25	22	29	35	28	32
7697	6.98	367.1	4-O-Feruloylquinic acid	[M-H]-	TRUE	367.103	C17H20O9	TRUE	TRUE	TRUE	88.3	77.2	79.2	367.1033:11088 368.10665:1817 369.11001:963	85.03133:19 113.02191:19 117.03932:74 127.03478:19 129.03267:38 134.0392:784 134.64941:37 147.04515:19 149.05789:148 149.07167:37 155.03229:111 169.08322:19 173.04283:111 173.05954:37 176.59972:19 191.05054:74 191.07201:37 192.44209:56 193.04953:2240 193.22803:21 323.21408:19 367.08954:37 367.10306:56 367.35458:74	36911	36598	35748	33867	36313	11771	9802	10492	9061	10984	8837	11176	11308	9675	9350	9276	9595	11564	11088	10473	9777	11724	12325
581	8.313	195.064	Ferulic acid	[M+H]+	TRUE	195.064	C10H10O4	TRUE	TRUE	TRUE	89.1	89.4	88.3	195.06429:2483 196.06764:275 197.071:498	79.05621:19 89.03955:130 106.04978:19 117.03362:149 121.07647:19 134.04147:74 145.02753:130 149.05844:74 177.05566:56	838	1195	1182	1336	1256	2264	2515	2437	2125	2216	2238	3199	2506	2930	2483	2440	2295	3414	3552	3403	3298	2968	2757
5641	13.566	311.218	FA 18:2+2O	[M-H]-	TRUE	311.221	C18H32O4	TRUE	TRUE	TRUE	90.6	84.8	86.6	311.22043:5339 312.22378:698 313.22714:6051	154.09691:25 172.10077:6 195.13554:49 249.22006:37 257.15201:6 284.11487:6 293.21017:566 294.22125:19 311.22534:192 311.29007:31	5483	5822	6446	7074	6896	5112	5292	4469	4555	4284	3701	5339	3885	3978	4659	4399	4949	4884	4750	4991	4008	4251	4179
5168	15.889	295.226	FA 18:2+1O	[M-H]-	TRUE	295.227	C18H32O3	TRUE	TRUE	TRUE	89.2	75.6	81.1	295.22586:5374 296.22921:1161 297.23257:1279	151.10526:9 171.09332:19 171.10255:158 172.12134:19 181.11852:19 191.10118:9 195.13177:28 195.13571:74 209.15039:19 267.23486:19 277.21533:355 278.21494:19 295.21716:84 295.22443:223	3812	5312	5868	5374	5457	1789	1378	1889	2018	2051	1565	1976	1829	1772	2119	1928	1691	1922	2055	1676	1868	1575	2184
1292	9.207	317.064	Eupafolin	[M+H]+	TRUE	317.06	C16H12O7	TRUE	TRUE	TRUE	87.8	72	87.4	317.06058:5003 318.06393:1144 319.06729:260	274.04443:111 274.07016:56 302.04419:372 304.10596:38 317.06598:493	476	667	880	959	810	5003	4779	4813	4226	4725	3644	4602	5108	4641	4200	3827	3760	4514	3758	3569	3737	3657	2963
1523	26.095	338.34	Erucamide	[M+H]+	TRUE	338.342	C22H43NO	TRUE	TRUE	TRUE	85.5	79.3	83.6	338.33957:8623 339.34292:2157 340.34628:234	55.0547:19 57.06901:9 57.07327:23 59.16293:5 67.05663:28 67.07281:9 69.07353:60 71.087:14 71.0989:19 72.0818:9 79.05817:14 81.06757:28 81.07392:37 83.05071:9 83.08545:37 83.10989:14 85.10469:14 91.05719:9 93.07109:14 95.08086:9 95.08636:28 97.10097:51 100.07632:33 101.2617:5 107.08433:14 109.09774:19 111.0808:23 111.11353:19 114.09415:23 119.71:5 121.10552:51 123.1145:23 125.09422:51 125.13369:19…	7551	7964	8582	8593	8623	1229	775	907	972	538	1157	1314	1141	1496	2000	663	1264	1532	1122	1071	759	2116	1201
2698	0.874	181.074	D-Sorbitol	[M-H]-	TRUE	181.072	C6H14O6	TRUE	TRUE	TRUE	86.9	77.8	79.9	181.07224:2322 182.07559:189 183.07895:378	59.01478:74 59.02562:56 71.01285:74 73.02869:37 73.04559:19 85.0407:37 88.02093:19 89.02752:74 96.14117:19 101.0246:37 119.03309:19	1558	1699	1459	1821	1763	2961	2322	1917	1622	2365	1637	2782	2806	1690	1858	1306	1231	1784	1792	1084	1418	1570	1434
3007	16.595	199.17	Dodecanoic acid	[M-H]-	TRUE	199.169	C12H24O2	TRUE	TRUE	TRUE	84.1	71.8	71.7	199.16872:5716 200.17207:734 201.17543:105	156.8985:9 199.17227:130 199.19418:28	9614	9100	10487	10912	9664	5002	6064	6233	3663	5818	4598	6648	6748	5539	4826	5477	3270	6720	7861	5716	5440	5136	4029
1065	0.787	102.058	DL-3-Aminoisobutyric acid	[M-H]-	TRUE	102.056	C4H9NO2	TRUE	TRUE	TRUE	63	88	71.1	102.05544:1376 103.05879:360 104.06215:0	102.05369:19 102.05653:19 102.06224:19	1186	877	931	1311	1347	1789	1442	1376	1178	1698	1184	1336	1632	1000	1294	1352	1576	1650	1818	1349	1260	1854	1263
5289	12.977	299.057	Diosmetin	[M-H]-	TRUE	299.058	C16H12O6	TRUE	TRUE	TRUE	94	90.5	91.3	299.05685:1551 300.0602:95 301.06356:95	239.92572:6 284.03394:235 285.03384:19 287.21835:6 299.05618:49 299.08548:12	917	1551	1166	742	1192	574	398	522	583	591	401	733	698	589	465	515	465	627	318	529	365	394	335
1175	17.394	302.306	Dihydrosphingosine	[M+H]+	TRUE	302.305	C18H39NO2	TRUE	TRUE	TRUE	88.5	87.5	87.4	302.30612:6587 303.30947:1388 304.31283:190	57.06951:12 60.04832:130 67.05604:19 69.07646:25 81.06695:12 81.07203:19 95.08435:25 95.09536:19 109.10003:12 145.10213:19 240.26672:19 254.28444:118 254.30695:31 261.13657:6 266.2825:31 284.28503:25 284.29694:142 302.31165:25	6348	6324	6175	6587	6157	205	179	206	150	191	217	463	504	453	503	408	423	207	248	203	212	229	199
3873	10.375	639.187	Demethoxycentaureidin 7-O-rutinoside	[M+H]+	TRUE	639.192	C29H34O16	TRUE	TRUE	TRUE	87.1	71.5	87.9	639.18939:2166 640.19274:1469 641.1961:550	129.05128:19 313.02957:19 315.04324:37 325.10913:19 331.07922:1159 332.0791:56 493.12448:111 493.15897:37 639.18292:93	7030	7920	7594	8126	7579	3738	4674	2487	2269	2438	2166	7124	7490	4487	3264	3761	3973	3753	2162	2074	2608	1689	1559
2601	12.029	453.116	Daidzein 7-O-beta-D-glucoside 4''-O-methylate	[M+Na]+	TRUE	453.11	C22H22O9	TRUE	TRUE	TRUE	81.2	78.2	82.9	453.11362:1430 454.11697:436 455.12033:104	100.10983:5 284.08722:14 285.09448:9 313.06729:46 313.09479:19 435.34802:5 438.0914:70 453.11758:330	352	377	396	505	531	1931	1887	1838	1508	1314	1112	2537	2164	1998	1430	1156	1441	1737	1343	1314	1144	983	848
2450	9.784	433.109	Cosmosiin; Apigenin 7-O-glucoside	[M+H]+	TRUE	433.11	C21H20O10	TRUE	TRUE	TRUE	88	76	85.2	433.10785:4155 434.1112:1204 435.11456:308	81.03638:19 100.88332:19 153.05072:38 213.05907:19 249.07375:19 263.06754:39 271.05771:1139 271.6134:20 278.84442:19 283.07709:37 386.13766:19	4155	4957	5298	6244	5874	18730	15629	14239	17608	15810	14553	17605	13624	15345	15650	15139	14454	13383	12238	12699	11830	10303	12565
2823	0.71	191.02	CITRATE	[M-H]-	TRUE	191.019	C6H8O7	TRUE	TRUE	TRUE	92.6	76.7	91.1	191.02031:147581 192.02366:16617 193.02702:3345	55.03124:37 57.0375:673 57.06308:87 57.07375:76 59.01568:130 63.29536:19 67.02046:1075 67.0586:77 67.50548:37 70.52456:19 73.03078:434 73.06818:49 75.52434:38 83.01679:148 84.76844:74 85.03244:2200 85.06889:79 86.03231:56 86.74069:74 86.80511:51 87.01038:4555 87.11178:137 87.1737:37 99.00414:37 99.00835:93 101.02397:148 101.43721:19 110.66165:37 111.01084:8078 111.12091:116 111.12686:253 111.1938…	147581	133954	138040	128799	138526	130903	112595	112131	86888	106800	97913	118323	128166	87453	112217	105423	97837	134736	129413	105552	90529	125790	117004
1152	10.016	301.069	Chrysoeriol	[M+H]+	TRUE	301.071	C16H12O6	TRUE	TRUE	TRUE	94.6	88.7	93.1	301.07001:16362 302.07336:3500 303.07672:916	149.05856:19 218.86865:19 229.04533:74 233.08765:19 250.98386:19 258.05005:617 283.14081:19 285.14658:38 286.02917:43 286.04349:1754 287.05182:37 288.84579:38 300.12567:40 301.05316:101 301.06784:1809	16362	17539	19829	22464	19947	47180	51319	47771	46586	42869	43885	53596	51775	43596	41640	38482	41437	45124	42021	42639	36259	41146	33596
5018	9.288	289.083	Catechin(+)	[M-H]-	TRUE	289.072	C15H14O6	TRUE	TRUE	TRUE	78	75	73	289.05954:637 290.06289:0 291.06625:0	289.10339:19	241	230	369	362	262	571	469	318	316	598	663	637	607	567	340	561	286	840	580	509	607	602	451
1639	18.617	347.217	Calycanthine	[M+H]+	TRUE	347.222	C22H26N4	TRUE	TRUE	TRUE	84.7	75	75	347.21899:4235 348.22234:999 349.2257:286	347.21957:130 347.23801:56	1687	1938	2466	2835	3290	4963	4662	5065	5454	5991	2541	3981	3854	4235	3510	3493	2325	4036	4003	4114	4190	3745	2896
7178	5.66	353.084	Isochlorogenic acid	[M-H]-	TRUE	353.087	C16H18O9	TRUE	TRUE	TRUE	84.9	77.9	74.8	353.08368:1134 354.08703:258 355.09039:0	50.87602:1 59.01626:3 62.29273:1 87.96695:1 93.05013:3 134.03476:7 135.04485:40 155.02916:3 159.05647:1 161.02232:7 161.06352:3 173.04686:4 178.48251:3 179.03354:80 191.05469:107 191.07225:33 192.98114:3 269.12369:1 353.08749:4 353.33948:4	604	180	758	220	386	738	491	628	555	687	505	814	733	449	844	537	561	1385	1547	1475	986	1485	1134
275	0.939	118.084	BETAINE	[M+H]+	TRUE	118.087	C5H11NO2	TRUE	TRUE	TRUE	92.7	92.4	91.8	118.08483:2274 119.08818:363 120.09154:166	56.05301:19 58.07034:167 58.07787:74 59.07501:56 118.08826:74	1160	1512	1632	1610	1612	2551	2515	2506	2888	2380	2342	2603	2728	2630	2659	1976	2873	1991	2274	2253	2156	2527	2412
3755	15.015	243.198	beta-Hydroxymyristic acid	[M-H]-	TRUE	243.197	C14H28O3	TRUE	TRUE	TRUE	85.2	75	74	243.19618:1776 244.19953:339 245.20289:0	59.01585:56 59.02019:56	1663	1260	1572	1909	1723	2084	1891	1972	1802	2099	1704	1702	1831	1794	1835	1776	1858	1705	1618	1836	1559	1372	2194
5773	2.364	315.071	Benzoic acid + 2O, O-Hex	[M-H]-	TRUE	315.071	C13H16O9	TRUE	TRUE	TRUE	93.5	86.4	88.8	315.07159:21752 316.07494:3292 317.0783:549	59.01424:6 71.01692:19 73.02678:6 81.03763:6 83.02153:9 91.48169:3 100.02026:3 101.02639:12 108.02243:417 109.02961:210 113.02554:15 115.80031:3 121.02964:12 123.04095:19 133.02855:9 135.04166:9 151.03967:40 151.53444:15 152.01086:1229 153.01834:519 163.03815:43 163.05798:15 165.0175:37 181.05238:12 195.02763:9 225.0424:12 242.90636:3 255.23224:12 255.25931:6 315.06702:277 315.07202:375	8598	4972	9666	6914	7952	26747	23020	23150	14851	21924	17183	24798	26361	20558	23676	19495	21752	22527	22456	16289	13605	21990	18016
5294	3.391	299.076	Benzoic acid + 1O, O-Hex	[M-H]-	TRUE	299.078	C13H16O8	TRUE	TRUE	TRUE	89.5	82	77.3	299.07623:2950 300.07958:345 301.08294:69	85.02938:5 89.03055:3 93.03248:87 136.59581:13 137.02173:515 138.02972:11	2950	2601	1973	2887	1913	7684	6262	7755	4229	7134	5958	5023	6502	2295	5873	5860	6576	6382	5109	5401	4032	5973	5251
1464	8.531	121.029	Benzoic acid	[M-H]-	TRUE	121.031	C7H6O2	TRUE	TRUE	TRUE	96.6	94.8	94.7	121.03062:7799 122.03397:1144 123.03733:88	65.04065:19 80.00037:9 91.03131:28 92.02783:367 93.03931:65 106.00599:9 120.02229:83 121.02946:512	7720	7799	6881	8082	7248	663	691	562	652	744	651	638	528	518	822	546	480	490	770	511	324	552	445
226	14.503	107.048	BENZALDEHYDE	[M+H]+	TRUE	107.05	C7H6O	TRUE	TRUE	TRUE	81	71.3	90	107.04638:1658 108.04973:249 109.05309:52	50.02729:14 51.02963:33 51.03669:28 53.04358:14 55.019:9 65.04104:28 65.05698:9 71.92838:14 77.04043:167 79.05304:19 81.03441:9 89.94122:5 91.05573:37 105.07652:5 107.04623:51	1380	1488	1658	2095	1700	464	472	649	620	426	432	533	468	575	555	582	92	566	640	589	376	556	404
6032	17.229	325.238	Avocadyne Acetate	[M-H]-	TRUE	325.238	C19H34O4	TRUE	TRUE	TRUE	65.2	91.1	77	325.23831:1333 326.24166:605 327.24502:484	133.06166:11 170.00529:11 183.01108:111 184.01488:19 197.02676:90 198.03447:8 225.05251:5 310.08157:3 325.1452:11 325.18338:680	942	1162	1242	1186	1333	1255	1655	1388	1382	1270	1355	959	1584	1698	1173	1466	1233	1599	1154	1986	1707	1049	1419
2744	12.23	471.217	atractyloside A	[M+Na]+	TRUE	471.22	C21H36O10	TRUE	TRUE	TRUE	85	88	78.4	471.21799:1271 472.22134:316 473.2247:95	471.22226:302	151	185	245	245	269	1276	1271	1006	717	790	999	707	749	537	412	231	410	967	764	745	802	687	839
2638	0.97	455.114	Asperulosidic acid	[M+Na]+	TRUE	455.11	C18H24O12	TRUE	TRUE	TRUE	83.8	70.2	75	455.11212:3637 456.11547:966 457.11883:1036	204.88474:19 270.90176:19 419.09271:19 455.09479:75 455.11285:473	12773	15050	15487	16590	15442	4913	4942	5972	4270	3734	3782	6230	4882	7172	4875	5222	4489	4988	5064	4283	4044	3637	3052
10215	10.319	431.097	apigetrin	[M-H]-	TRUE	431.098	C21H20O10	TRUE	TRUE	TRUE	91.8	89.8	91.6	431.09729:1825 432.10064:354 433.104:472	268.03836:111 269.04218:74 387.13614:19 431.08978:167 431.12201:93	563	504	615	719	376	1644	1516	1482	1062	1757	1337	1040	1494	1825	1262	1399	1389	1193	1291	1023	1089	1175	1223
2868	9.977	493.134	Anthocyanidin base + 4O, 2MeO, O-Hex	[M]+	TRUE	493.133	C23H25O12	TRUE	TRUE	TRUE	84.9	72.2	80	493.1333:307174 494.13665:93029 495.14001:26382	55.94759:19 61.03967:19 69.03727:56 71.05972:37 73.02933:19 81.03461:37 85.03187:266 87.2247:19 97.03289:93 99.04543:56 103.19984:19 125.68854:19 127.03883:186 136.01375:37 139.05293:19 145.04839:260 150.0323:19 153.02081:56 173.02333:19 178.0256:56 203.03084:37 211.54134:19 229.04594:37 242.0558:130 243.05824:19 258.0463:93 258.06216:93 267.03195:19 269.39215:57 270.05051:861 273.02774:74 285.02…	243119	315638	313837	313219	307174	395720	278568	312604	316442	236579	289933	364991	404618	315156	298819	229466	314233	257054	238098	285216	165768	208463	234118
4364	12.67	269.048	Aloe-emodin	[M-H]-	TRUE	269.046	C15H10O5	TRUE	TRUE	TRUE	88.3	72.6	86.5	269.0481:2509 270.05145:282 271.05481:1129	59.01764:74 59.11309:7 107.017:7 117.03378:45 120.02551:7 149.02202:48 151.00655:48 151.01869:15 155.9865:15 159.04387:11 166.04507:7 169.06683:7 183.04593:7 191.05827:22 201.0573:19 205.12022:19 209.05847:15 225.05673:41 225.07791:15 268.21368:7 269.04416:200 269.08813:59 269.1113:11	2455	2509	2944	2874	2421	1511	1440	1034	1158	1016	1160	1461	1387	1222	1535	1625	1478	1272	1080	1423	1205	1487	1410
4547	26.504	277.215	a-Linolenic acid	[M-H]-	TRUE	277.218	C18H30O2	TRUE	TRUE	TRUE	89	88	77	277.21887:2915 278.22222:1254 279.22558:504	277.21494:204 277.24313:93	2915	3077	2992	2537	2871	5222	3784	2591	4102	3523	4546	3387	4393	3952	2553	3091	3120	6769	3728	4418	4275	4313	4114
5428	20.971	303.235	Aleuretic Acid	[M-H]-	TRUE	303.218	C16H32O5	TRUE	TRUE	TRUE	62.1	75	75	303.23083:1105 304.23418:242 305.23754:121	303.23767:37	1703	1188	1163	1105	1248	69	140	133	120	186	107	177	225	207	152	182	108	156	102	129	98	308	120
1394	8.656	329.065	Aflatoxin G1	[M+H]+	TRUE	329.065	C17H12O7	TRUE	TRUE	TRUE	86.5	84.1	80.5	329.0639:1749 330.06725:345 331.07061:391	283.05853:74 289.75198:19 300.06351:37 301.07178:38 311.08044:37 329.06683:430	404	504	603	734	679	1398	1762	1643	1258	1367	1210	1705	1939	1580	1454	1627	1493	1949	2129	2142	1977	1940	1749
1642	1.024	348.065	Adenosine 5'-monophosphate	[M+H]+	TRUE	348.071	C10H14N5O7P	TRUE	TRUE	TRUE	90.7	79.2	92.8	348.07315:2792 349.0765:1720 350.07986:0	97.0295:56 119.04:19 136.06073:565 182.06448:19 212.83565:37 283.84628:19 348.06598:37	1820	2190	3320	2792	2133	2027	2631	2700	2329	2202	2612	2787	2443	2126	2196	1971	2066	3156	3005	2667	3203	3129	2251
1034	15.554	285.075	Acacetin	[M+H]+	TRUE	285.076	C16H12O5	TRUE	TRUE	TRUE	91.2	85	89.1	285.07474:1818 286.07809:446 287.08145:704	55.05691:3 89.04139:1 95.08915:3 109.09921:3 119.04526:3 119.08376:4 121.02938:6 123.04555:3 124.0135:7 128.06218:3 133.09763:3 139.05118:3 141.07918:3 143.08977:3 145.02789:4 147.11255:3 155.02649:3 157.09839:4 159.11461:3 165.0191:3 165.13155:1 167.03246:19 168.06476:3 169.08554:3 170.86507:10 183.11813:4 184.86618:3 187.03735:6 187.16672:3 191.14246:3 196.05229:3 197.0556:7 199.04202:3 211.143…	1839	1818	1839	1954	1851	9	10	15	22	14	19	12	22	16	10	17	14	14	14	21	20	12	21
5367	21.984	301.217	Abietic acid	[M-H]-	TRUE	301.219	C20H30O2	TRUE	TRUE	TRUE	88.8	72.9	73.8	301.21777:10691 302.22112:2541 303.22448:847	255.23123:19 300.26245:58 301.21948:2036	11878	10691	11014	10014	10692	392	404	398	364	404	140	222	228	322	340	383	425	383	123	137	284	178	344
3973	20.432	253.217	9-Trans-Palmitelaidic acid	[M-H]-	TRUE	253.218	C16H30O2	TRUE	TRUE	TRUE	89.3	88	79.1	253.21854:2807 254.22189:472 255.22525:1298	253.21648:297	5634	5547	6034	5217	6059	4039	3445	2807	3647	3319	3390	3265	3161	2629	3761	5189	4839	3556	3628	3517	2928	2892	2808
4623	21.138	279.258	9E, 11E-Linoleic acid	[M-H]-	TRUE	279.235	C18H32O2	TRUE	TRUE	TRUE	78.5	84.2	75.8	279.24899:10210 280.25234:2465 281.2557:1160	192.9812:19 236.14182:19 265.28268:19 279.23145:1058	80530	80550	80525	83100	80929	10148	9326	9598	9369	11183	7223	10210	11694	10714	11825	11682	11049	16529	14397	12535	13638	12198	11524
15887	8.891	593.15	8-[4,5-dihydroxy-6-(hydroxymethyl)-3-[3,4,5-trihydroxy-6-(hydroxymethyl)oxan-2-yl]oxyoxan-2-yl]-5,7-dihydroxy-2-(4-hydroxyphenyl)chromen-4-one	[M-H]-	TRUE	593.151	C27H30O15	TRUE	TRUE	TRUE	93.2	84.8	92.1	593.15125:73338 594.1546:26676 595.15796:7080	57.05228:6 59.01556:93 61.15544:6 71.02318:25 89.0257:142 101.02263:62 113.0246:62 119.03397:186 119.04936:37 131.03123:19 132.30743:6 143.035:31 161.05014:19 179.05536:49 269.04416:62 281.04211:25 282.05573:49 283.05219:25 292.11856:19 292.83786:13 293.04321:1544 295.05203:19 310.04105:31 311.05334:161 312.05734:25 323.05313:161 325.06796:31 335.05264:68 341.06799:167 353.04968:19 353.06027:62 3…	31578	29732	31249	30425	29445	77755	69215	72539	63405	64515	60196	56068	58851	49674	50440	48523	45824	76500	73338	64627	62642	65273	59012
12328	9.619	491.115	7-hydroxy-2-(4-hydroxy-3,5-dimethoxyphenyl)-5-[(2S,3R,4S,5S,6R)-3,4,5-trihydroxy-6-(hydroxymethyl)oxan-2-yl]oxychromen-4-one	[M-H]-	TRUE	491.12	C23H24O12	TRUE	TRUE	TRUE	95.4	87.3	92.3	491.12125:283026 492.1246:73455 493.12796:15567	107.03294:9 121.02942:19 148.01555:46 149.02177:74 151.00108:46 161.02547:37 177.05363:19 185.02345:28 199.03868:28 214.0278:28 219.06639:28 221.03865:19 227.03183:56 239.59502:9 243.02623:65 243.06145:28 255.02812:102 261.07025:28 269.03659:19 270.01904:37 270.04688:28 271.0242:343 282.01465:28 284.03293:28 285.0376:84 285.07812:84 286.04883:37 297.02783:19 299.01846:1201 300.0542:65 310.04242:3…	283919	283026	272867	285120	287170	647988	605047	598159	564195	563302	548550	637930	696542	561374	613599	571997	593715	541532	521136	471174	453443	451257	427438
10533	17.894	441.242	6,8-dihydroxy-2,2,4,4-tetramethyl-7-(3-methylbutanoyl)-9-(2-methylpropyl)-9H-xanthene-1,3-dione	[M-H]-	TRUE	441.229	C26H34O6	TRUE	TRUE	TRUE	77.9	72.5	74.1	441.24057:826 442.24392:300 443.24728:100	440.13535:6 441.25235:173	654	826	762	1017	1010	527	422	508	732	303	460	422	532	611	373	546	341	504	588	528	581	645	546
340	0.913	130.048	L-Pyroglutamic acid	[M+H]+	TRUE	130.05	C5H7NO3	TRUE	TRUE	TRUE	89.2	91.6	77.5	130.04903:3724 131.05238:356 132.05574:87	55.02784:19 56.06301:37 84.04568:204	4929	5409	5739	6042	6448	3724	3376	3541	4097	3529	3403	3666	3498	3482	3758	2784	3779	3790	3824	4014	3380	4159	4009
11204	10.494	461.105	5,7-dihydroxy-6-methoxy-2-[4-[(2S,3R,4S,5S,6R)-3,4,5-trihydroxy-6-(hydroxymethyl)oxan-2-yl]oxyphenyl]chromen-4-one	[M-H]-	TRUE	461.109	C22H22O11	TRUE	TRUE	TRUE	93	79.4	89.6	461.10745:5838 462.1108:1845 463.11416:123	141.02754:19 255.02518:56 271.02594:19 283.0224:111 284.04196:37 297.03717:37 298.04752:148 299.05472:167 311.02954:19 313.02905:37 371.24661:19 444.68527:38 446.07629:186 455.8743:19 459.62781:38 461.10565:1020	2386	2570	2652	2030	2575	5919	5174	5743	5618	6729	5142	5795	5791	5850	6041	5838	6667	5361	4669	4456	4437	4063	4669
3350	8.907	565.156	5,7-dihydroxy-2-(4-hydroxyphenyl)-6-[3,4,5-trihydroxy-6-(hydroxymethyl)oxan-2-yl]-8-(3,4,5-trihydroxyoxan-2-yl)chromen-4-one	[M+H]+	TRUE	565.153	C26H28O14	TRUE	TRUE	TRUE	89.1	91.1	89.4	565.15656:64532 566.15991:29193 567.16327:8346	103.04057:19 119.05174:19 121.02509:28 143.05197:9 151.04141:19 158.03365:9 177.01393:19 187.05141:19 189.05873:19 195.07993:9 201.01933:19 203.03569:28 211.03358:19 215.03249:19 231.02573:19 241.06398:19 253.08437:9 268.07141:19 271.06567:74 273.03534:19 279.06494:28 281.04684:19 283.05951:84 285.03882:28 294.04807:93 295.05829:700 296.0654:28 297.07663:37 301.08496:19 306.09979:19 307.05875:609…	40562	53230	47912	55719	64465	86307	88344	73101	64532	60891	63758	78761	107191	85484	65380	75257	91016	74838	72128	76802	61275	45737	56935
896	9.784	271.057	5,7-dihydroxy-2-(4-hydroxyphenyl)-4H-chromen-4-one	[M+H]+	TRUE	271.06	C15H10O5	TRUE	TRUE	TRUE	92.9	94.2	88.7	271.05936:17796 272.06271:3375 273.06607:559	57.08935:9 67.02235:28 91.05704:28 95.06017:9 114.09317:46 119.04597:130 121.02705:93 121.04724:19 123.73788:9 145.02783:102 147.08345:19 153.01741:593 155.04431:19 162.67982:19 163.0401:56 168.51224:19 173.06303:9 187.03868:46 197.07909:19 203.06877:28 209.65469:9 213.05299:9 225.04994:37 228.03711:19 229.05074:46 243.06801:46 253.05414:37 270.22406:37 271.06003:3862 271.23669:42 271.47153:37	3068	4198	4502	6488	5635	19583	17320	17983	16720	17117	14386	20155	17796	19544	16302	15362	14763	15091	14009	14109	11798	13803	11919
16927	9.795	623.158	5,7-dihydroxy-2-(4-hydroxy-3-methoxyphenyl)-3-[3,4,5-trihydroxy-6-[[(2R,3R,4R,5R,6S)-3,4,5-trihydroxy-6-methyloxan-2-yl]oxymethyl]oxan-2-yl]oxychromen-4-one	[M-H]-	TRUE	623.162	C28H32O16	TRUE	TRUE	TRUE	89.3	75.5	86.2	623.15967:3204 624.16302:717 625.16638:476	314.03412:19 315.05542:111 443.09711:56 551.00012:19 623.14709:188 623.19995:130	1036	889	1083	1185	1330	3259	3872	3920	3759	3204	2529	3541	3430	3314	2894	3263	2859	3790	2971	2927	3130	2972	2667
1056	15.377	287.092	5,7,4'-Trihydroxy-8-methylflavanone	[M+H]+	TRUE	287.09	C16H14O5	TRUE	TRUE	TRUE	90.7	78.5	91.7	287.08871:1362 288.09206:291 289.09542:130	111.12381:19 141.09259:19 147.03725:56 147.04239:111 167.03256:260 167.05627:56 172.86183:74 287.09381:93	1265	1232	1344	1367	1362	20	18	31	30	22	19	19	19	30	23	19	11	18	14	19	16	16	21
2695	12.23	181.05	4-O-Methylphloracetophenone	[M-H]-	TRUE	181.051	C9H10O4	TRUE	TRUE	TRUE	84.2	74.8	72.2	181.04988:719 182.05323:318 183.05659:319	62.00238:12 89.00936:6 93.0517:6 110.47737:6 123.00678:12 138.032:49 138.04195:12 149.99423:6 151.91563:6 165.01624:12 166.02222:37	634	679	365	581	719	186	190	234	275	144	111	403	229	192	228	259	108	176	119	182	263	202	171
1822	25.323	138.018	4-Nitrophenol	[M-H]-	TRUE	138.019	C6H5NO3	TRUE	TRUE	TRUE	92.3	77.7	87.5	138.01772:4250 139.02107:520 140.02443:520	91.02209:19 94.05518:19 108.02277:93 138.01909:130	1555	1275	1233	1295	1588	3478	3501	4250	3473	3054	1608	3562	4026	3739	3402	1760	1441	4674	3373	3781	2524	2785	1316
2730	11.478	469.111	4''-methyloxy-Genistin	[M+Na]+	TRUE	469.11	C22H22O10	TRUE	TRUE	TRUE	80.2	72.1	80.5	469.10803:3028 470.11138:1155 471.11474:155	315.04279:37 400.57526:19 423.06848:56 428.02451:19 445.24631:38 468.91638:38 469.10898:574	633	934	1045	1087	1152	3027	3409	2921	2423	2644	2172	3436	3270	2367	2556	1934	2195	3028	2574	3000	2304	2030	1960
1957	10.572	144.04	4-Hydroxyquinoline	[M-H]-	TRUE	144.045	C9H7NO	TRUE	TRUE	TRUE	90.5	85.4	85.8	144.04195:622 145.0453:202 146.04866:0	115.04629:19 142.0294:9 144.04488:83	544	703	402	622	595	301	267	341	271	371	348	469	336	357	280	346	141	385	442	352	330	526	249
1802	6.092	137.027	4-Hydroxybenzoic acid	[M-H]-	TRUE	137.024	C7H6O3	TRUE	TRUE	TRUE	93.7	83	87.9	137.02359:3974 138.02694:231 139.0303:386	65.04171:59 65.05309:31 75.02425:12 92.7467:19 93.03509:702 94.03701:9 137.02812:12	4095	4123	3974	3888	4075	2875	2497	3206	1804	2782	2170	3126	3404	2634	3510	2416	2541	4038	3280	3408	2716	3256	2773
2361	3.168	163.039	3-Hydroxycinnamic acid	[M-H]-	TRUE	163.04	C9H8O3	TRUE	TRUE	TRUE	91	92.3	79.4	163.03888:774 164.04223:0 165.04559:433	61.99133:7 91.0164:7 93.03239:7 93.04736:7 117.04576:11 119.05001:152 135.04457:4	774	523	555	614	528	181	275	236	181	204	102	363	307	220	126	146	136	251	199	142	138	253	197
17516	9.874	639.168	3-{[(2S,3R,4S,5R,6R)-3-{[(2S,3S,4R,5R,6S)-3,5-dihydroxy-4-methoxy-6-methyloxan-2-yl]oxy}-4,5-dihydroxy-6-methyloxan-2-yl]oxy}-8-hydroxy-15-methyl-11,18-dioxapentacyclo[10.6.2.0?,?.0?,??.0??,??]icosa-1,3,5,7,9(19),12(20),13,15-octaene-10,17-dione	[M-H]-	TRUE	639.171	C32H32O14	TRUE	TRUE	TRUE	86.7	75.1	83	639.1701:777 640.17345:282 641.17681:282	475.16049:9 639.16974:149 639.50879:19	777	655	574	599	621	1283	1323	1036	1079	965	1424	1582	1754	1629	1519	1153	1086	1534	1320	1020	863	1266	950
16415	8.422	609.146	3-[4,5-dihydroxy-6-(hydroxymethyl)-3-[3,4,5-trihydroxy-6-(hydroxymethyl)oxan-2-yl]oxyoxan-2-yl]oxy-5,7-dihydroxy-2-(4-hydroxyphenyl)chromen-4-one	[M-H]-	TRUE	609.146	C27H30O16	TRUE	TRUE	TRUE	87.6	70.1	81.2	609.14441:91329 610.14776:37364 611.15112:9476	83.09351:9 99.28894:9 113.02698:28 119.03483:56 284.03195:37 285.04379:111 295.57892:9 297.0415:56 297.10962:38 298.047:285 299.05905:28 308.07394:29 309.03836:679 311.04391:28 325.02774:37 326.04126:111 326.0744:38 327.04871:342 338.03592:84 339.04871:225 341.06842:28 351.04538:84 353.0607:37 356.05585:56 357.06058:452 369.06802:176 371.07724:56 381.05362:56 385.05627:28 387.06961:28 393.05438:3…	47380	45347	45229	45042	49438	108821	94620	102526	84791	90885	81309	108669	112987	103503	98515	99627	91329	168166	134614	117084	116240	127604	114086
12539	13.91	497.16	3,5-dihydroxy-4-[3,4,5-trihydroxy-6-[[4-(2-hydroxypropan-2-yl)cyclohexene-1-carbonyl]oxymethyl]oxan-2-yl]oxybenzoic acid	[M-H]-	TRUE	497.166	C23H30O12	TRUE	TRUE	TRUE	85.9	75.4	77.7	497.16541:941 498.16876:344 499.17212:172	171.97578:5 171.98134:27 172.98973:8 417.21143:16 497.16873:164	1148	826	859	1292	1092	1100	1020	988	1236	1024	991	1101	1071	992	1026	1210	1147	1085	1004	1186	996	1185	941
1076	6.309	289.092	2-methyl-3-[(2S,3R,4S,5S,6R)-3,4,5-trihydroxy-6-(hydroxymethyl)oxan-2-yl]oxypyran-4-one	[M+H]+	TRUE	289.092	C12H16O8	TRUE	TRUE	TRUE	87	84.7	75.5	289.08984:2515 290.09319:446 291.09655:112	53.0794:3 57.03685:3 61.03288:3 69.03497:4 81.035:6 85.02978:17 97.02961:6 109.02536:4 126.6544:4 127.03913:357 127.41329:3 128.04024:7 145.04413:3 204.86397:1 256.05264:1	836	1016	1057	1039	1162	2381	2394	2515	2544	2262	1909	2186	2450	2059	1754	1624	1569	1998	2135	2054	1835	1745	1712
2577	9.709	449.107	2'-Hydroxygenistein-7-O-glucoside	[M+H]+	TRUE	449.103	C21H20O11	TRUE	TRUE	TRUE	83.2	81.9	76.6	449.10257:2925 450.10592:550 451.10928:184	135.04004:19 207.05753:38 240.85423:19 287.05289:708	2146	2925	2687	2883	3019	7336	7104	5679	6455	6922	5564	8046	7401	5907	5758	6625	6847	8684	7928	7981	6670	6876	6819
3198	18.448	537.303	2-hydroxy-3-{[3,4,5-trihydroxy-6-(hydroxymethyl)oxan-2-yl]oxy}propyl (9Z,12Z,15Z)-octadeca-9,12,15-trienoate	[M+Na]+	TRUE	537.3	C27H46O9	TRUE	TRUE	TRUE	84.4	84.6	78.3	537.30096:9004 538.30431:2934 539.30767:677	281.05472:28 282.05423:46 301.19794:9 341.01633:19 362.78723:9 375.27075:19 535.58838:19 535.6145:38 536.87292:21 537.30798:2384	6685	7184	9148	9004	10884	20910	28839	23411	19682	17200	13015	11210	14737	10566	6738	4520	5640	11134	10742	10909	12945	9691	11149
4302	6.055	266.084	N-(1-Carboxyethyl)-2'-deoxyguanosine	[M-H2O-H]-	TRUE	266.09	C10H15N5O5	TRUE	TRUE	TRUE	92.2	84.7	84.5	266.08911:442 267.09246:69 268.09582:0	108.01761:8 133.00542:5 133.01518:21 150.04192:80 176.05824:11 266.08768:16	594	478	503	648	561	552	487	402	442	569	600	505	460	476	485	268	503	490	606	299	311	448	314
435	6.476	155.033	2,5-Dihydroxybenzoate	[M+H]+	TRUE	155.034	C7H6O4	TRUE	TRUE	TRUE	82	84.3	83.4	155.02991:1523 156.03326:139 157.03662:78	53.04473:23 55.93693:9 56.95179:5 65.04228:9 67.05662:9 69.00198:14 71.05842:5 72.93756:28 75.00128:5 81.03321:70 85.95576:5 100.93092:5 109.02538:32 109.04454:9 111.04942:9 137.02121:116	1140	1554	1523	1529	1790	1139	1102	1176	949	1131	1038	1380	1497	1285	1504	1161	1287	1191	1295	1008	1201	1410	1113
434	7.198	155.033	2,3-Dihydroxybenzoate	[M+H]+	TRUE	155.034	C7H6O4	TRUE	TRUE	TRUE	88.2	91.9	83.2	155.03284:1935 156.03619:181 157.03955:105	53.0404:16 53.13605:3 55.02209:16 55.04827:3 68.99756:3 69.00108:4 72.93675:7 79.02235:3 81.03388:37 81.07073:3 104.95223:1 107.01427:17 109.03002:10 109.04034:4 125.03953:1 127.81223:1 137.02402:251 138.04872:3 155.03166:3	470	546	618	750	699	1927	1948	1935	2036	1958	1979	1917	1922	2003	2050	1773	1806	1634	1677	1795	1647	1678	1510
1171	16.47	302.303	2,2'-(Tetradecylimino)diethanol	[M+H]+	TRUE	302.305	C18H39NO2	TRUE	TRUE	TRUE	91.6	86.5	86.5	302.30511:18945 303.30846:4529 304.31182:569	57.07381:51 58.06769:14 70.06783:70 71.08526:23 85.10413:19 88.07774:172 102.09377:65 106.08844:130 240.26469:23 256.26697:14 258.27969:46 284.29236:332 301.35791:32 301.54416:23 302.30447:2600	20984	18540	19599	18945	18451	1971	2116	2030	2570	2415	2112	3005	3357	4271	3882	3024	8270	1907	1730	2122	2366	1542	2586
2254	8.377	409.182	2-(5-methoxy-4,8,8-trimethyl-2-oxo-2,8,9,10-tetrahydropyrano[2,3-f]chromen-3-yl)-N-(pyridin-2-yl)acetamide	[M+H]+	TRUE	409.18	C23H24N2O5	TRUE	TRUE	TRUE	88.2	85.9	85.9	409.18271:1843 410.18606:693 411.18942:403	409.18365:186 409.21509:37	1559	2037	1901	1292	1488	2174	1935	1953	1800	1288	1640	2483	1938	1794	1845	1702	1652	2159	1917	1843	1392	1463	1706
4059	11.848	683.357	2-((7-acetamido-1,2,3-trimethoxy-9-oxo-5,6,7,9-tetrahydrobenzo[a]heptalen-10-yl)amino)-N-(3-(5-isopropyl-1H-1,2,4-triazol-3-yl)phenyl)-4-methylpentanamide	[M+H]+	TRUE	683.36	C38H46N6O6	TRUE	TRUE	TRUE	85.2	86	74.7	683.36053:3826 684.36388:2145 685.36724:670	110.0732:9 177.05383:19 331.08716:19 503.29108:19 503.32593:19 672.7832:9 681.59167:37 683.25104:22 683.36169:2744	1994	2123	2800	2995	2670	5802	5304	4984	3391	4858	3122	5688	4138	4198	3826	3290	2755	5624	4407	4174	3902	3804	3411
11798	17.654	476.295	1-Hydroxy-2-(9Z,12Z-octadecadienoyl)-sn-glycero-3-phosphoethanolamine	[M]-	TRUE	476.277	C23H43NO7P	TRUE	TRUE	TRUE	84.8	76	71.7	476.27951:1334 477.28286:119 478.28622:238	140.00427:6 214.0488:37 279.21906:31 279.23322:439 476.27081:25	1661	1546	1472	1675	1334	652	751	440	643	960	692	720	712	835	454	684	593	360	762	505	367	589	538
5311	17.53	299.255	12-Hydroxyoctadecanoic acid	[M-H]-	TRUE	299.259	C18H36O3	TRUE	TRUE	TRUE	93.4	83.4	85.9	299.2576:9364 300.26095:1448 301.26431:132	78.79336:4 113.09671:15 126.02957:7 127.10933:7 167.13773:11 169.16011:22 213.15173:7 239.23564:7 253.25404:45 253.27652:19 281.24176:82 284.12976:7 287.26929:4 297.23895:63 298.32278:15 299.1449:15 299.21326:19 299.25964:1378	9478	10400	9138	10629	9009	10111	6759	6025	4419	3122	2587	7438	9364	7364	5561	4532	2718	2568	3685	2852	2758	1900	2274
23249	9.816	769.231	[6-[2-(3,4-dihydroxyphenyl)ethoxy]-2-(hydroxymethyl)-4-(3,4,5-trihydroxy-6-methyloxan-2-yl)oxy-5-(3,4,5-trihydroxyoxan-2-yl)oxyoxan-3-yl] (E)-3-(4-hydroxy-3-methoxyphenyl)prop-2-enoate	[M-H]-	TRUE	769.256	C35H46O19	TRUE	TRUE	TRUE	84.8	71.2	86.6	769.2478:15088 770.25115:8106 771.25451:4209	119.05008:37 160.02263:19 193.04973:56 194.1239:19 205.04581:37 233.06963:19 235.0562:111 235.0865:37 265.07779:93 281.05478:19 293.04401:241 293.07303:56 295.0795:93 308.02963:19 311.05914:56 323.05142:111 323.07678:37 341.06879:74 353.0611:56 371.07773:38 383.07355:38 411.80301:38 413.0929:733 420.99908:19 436.99197:19 443.09702:260 519.80542:19 557.15344:37 584.09351:19 591.29596:38 593.1507:3…	11390	12598	11801	9755	13902	40585	41292	45148	30415	36745	33851	31922	28449	15088	27763	16675	26626	31551	27345	27720	29712	28607	32283
22548	9.174	755.233	[6-[2-(3,4-dihydroxyphenyl)ethoxy]-2-(hydroxymethyl)-4-(3,4,5-trihydroxy-6-methyloxan-2-yl)oxy-5-(3,4,5-trihydroxyoxan-2-yl)oxyoxan-3-yl] (E)-3-(3,4-dihydroxyphenyl)prop-2-enoate	[M-H]-	TRUE	755.24	C34H44O19	TRUE	TRUE	TRUE	87	80.5	83.1	755.2334:9037 756.23675:4800 757.24011:1878	161.0638:37 307.05099:19 309.04269:74 338.0329:19 355.06552:19 357.07901:37 399.06262:19 424.78357:19 429.08221:130 530.22552:19 609.14581:93 612.086:19 635.13605:130 695.51807:37 749.61066:19 752.81372:56 755.18945:2607	2278	2733	3116	3207	3409	7162	9037	8294	5963	4908	2524	5997	6581	6270	5790	7054	8275	8807	7957	7467	6239	6413	7634
6157	11.036	329.233	(Z)-5,8,11-trihydroxyoctadec-9-enoic acid	[M-H]-	TRUE	329.233	C18H34O5	TRUE	TRUE	TRUE	93.4	85	94.5	329.22931:7234 330.23266:1858 331.23602:186	57.04329:9 99.08243:22 124.06095:3 125.10858:12 127.11201:31 127.12952:15 129.09447:6 139.11365:19 155.14928:15 165.12694:15 167.14081:12 171.09621:37 171.10359:87 183.14062:68 185.11711:15 192.07141:3 193.12131:31 197.11757:6 199.13403:9 201.11272:6 209.04568:25 209.11711:31 210.4807:12 210.62201:6 211.13441:389 212.13641:9 225.14105:6 229.14436:281 230.14108:6 243.15422:6 291.22205:3 293.21494:…	7388	7687	6885	7120	7234	1074	1162	1407	1514	1119	1086	1240	1224	1091	860	1238	999	1135	1228	1112	1208	1224	962
3905	24.087	643.247	6-{[7-(acetylamino)-1,2,3-trimethoxy-9-oxo-5,6,7,9-tetrahydrobenzo[a]heptalen-10-yl]amino}-N-[(2E)-3,4,5,6-tetrahydro-2H-cyclopenta[d][1,3]thiazol-2-ylidene]hexanamide	[M+Na]+	TRUE	643.26	C33H40N4O6S	TRUE	TRUE	TRUE	84.2	72.1	75	643.25696:4381 644.26031:3369 645.26367:1020	175.16618:19 353.32498:9 387.28625:28 625.58124:9 641.22638:19 643.2511:2293 643.40863:19 643.48022:32 643.52679:43	6573	8924	6760	7077	7101	4080	2639	2717	2109	2048	1877	6937	6571	5337	4381	3763	2752	9624	8116	5994	4386	3518	2179
6137	12.879	329.065	(2Z)-4,6-dihydroxy-2-[(4-hydroxy-3,5-dimethoxyphenyl)methylidene]-1-benzofuran-3-one	[M-H]-	TRUE	329.067	C17H14O7	TRUE	TRUE	TRUE	95.3	86.7	92.1	329.06857:36372 330.07192:5937 331.07528:1556	139.81544:9 147.04614:9 155.07016:19 161.01933:56 161.04262:37 171.10347:19 183.03729:19 185.02473:28 187.00552:19 199.0441:46 201.02232:46 203.03246:28 212.90141:9 215.03822:37 227.03355:121 229.01138:37 241.21628:65 243.02814:56 253.01685:9 268.03497:46 269.05035:19 271.02643:1002 272.02182:28 284.02576:28 284.04004:46 285.04236:139 285.20441:19 296.03381:28 297.03519:56 298.06747:46 298.08209:…	34349	36604	37664	35816	36736	53420	47186	47709	44916	44122	38175	43903	42186	39504	44547	40466	36372	30447	29849	29443	23723	23429	18964
7874	7.551	371.096	(2S,3S,4S,5R,6R)-6-(3-benzoyloxy-2-hydroxypropoxy)-3,4,5-trihydroxyoxane-2-carboxylic acid	[M-H]-	TRUE	371.099	C16H20O10	TRUE	TRUE	TRUE	91.7	88.3	92.6	371.09573:25327 372.09908:5791 373.10244:1025	59.01745:68 59.02396:31 67.02:6 69.04205:19 71.01562:49 71.67847:6 75.00832:87 77.03632:12 77.04003:80 85.02533:31 85.03054:74 87.00713:31 89.02507:37 91.88689:6 95.0181:56 99.00343:12 99.00764:37 101.33275:6 113.02366:173 115.00542:31 117.01968:43 121.02921:855 127.58588:6 129.02151:25 151.04076:6 157.00832:19 160.43297:6 175.01974:19 189.03801:31 231.04941:161 237.39114:6 249.06094:1107 311.074…	27489	26441	25327	24250	27458	37294	31928	31670	29352	32492	33350	37832	42278	38103	36926	36231	35316	31354	30175	29393	27958	29067	27179
2428	24.678	431.31	(2'R,5'R,9S)-4-hydroxy-5',6a,8a,9-tetramethylicosahydrospiro[naphtho[2',1':4,5]indeno[2,1-b]furan-10,2'-pyran]-2(11aH)-one	[M+H]+	TRUE	431.31	C27H42O4	TRUE	TRUE	TRUE	90.4	87.8	75	431.31015:2351 432.3135:1112 433.31686:5448	431.315:299 431.35019:74	1860	2151	1652	1613	1384	2165	2148	1635	1780	1642	2351	1370	1358	1271	1222	1796	1520	1100	804	751	638	1744	1539
4018	9.951	677.165	(2R,3R,4S,5R,6R)-2-(acetoxymethyl)-6-((3-(benzo[d][1,3]dioxol-5-yl)-6-ethyl-2-methyl-4-oxo-4H-chromen-7-yl)oxy)tetrahydro-2H-pyran-3,4,5-triyl triacetate	[M+Na]+	TRUE	677.18	C33H34O14	TRUE	TRUE	TRUE	88.4	75.9	87.3	677.17719:1252 678.18054:1023 679.1839:292	177.0537:19 209.1539:56 303.08832:19 331.12109:19 347.10104:111 353.06461:37 623.27118:19 641.2804:38 677.17163:549	463	399	952	954	997	3042	2376	1718	3246	1252	2766	2535	3299	2170	2941	2745	1406	1921	1400	2220	1172	1200	1881
12128	18.32	485.317	(1R,2R,5S,8R,14R,15R,16S)-16-hydroxy-1,2,14,17,17-pentamethyl-8-(prop-1-en-2-yl)pentacyclo[11.7.0.0(2),(1).0,.0(1),(1)]icosane-5,15-dicarboxylic acid	[M-H]-	TRUE	485.326	C30H46O5	TRUE	TRUE	TRUE	84	72.6	63.1	485.32294:2215 486.32629:738 487.32965:985	470.0368:6 483.80829:13 485.28094:576	34395	31431	34597	32799	32939	3611	10000	2223	2215	2119	1957	3864	2358	1464	1569	1361	1381	9569	2460	1262	1487	2074	1369
